# Supplementary material for: The Costs of Dementia in Europe: An Updated Review and Meta-analysis
Source: PubMed Central journal article supplement — Pharmacoeconomics. 2022 Nov 15;41(1):59–75. doi: 10.1007/s40273-022-01212-z (PMC9813179; doi:10.1007/s40273-022-01212-z), 2022-11-15

## Electronic Supplementary Materials

**Manuscript title: The costs of dementia in Europe: an updated review and meta-analysis**

Linus Jönsson<sup>1</sup>, Ashley Tate<sup>1</sup>, Oskar Frisell<sup>2</sup>, Anders Wimo<sup>1</sup>

1. Department of Neurobiology, Care Sciences and Society, Karolinska Institutet, Solna, Sweden
2. Institute of Health Economics (IHE), Stockholm, Sweden

Email address for correspondence: [linus.jonsson@ki.se](mailto:linus.jonsson@ki.se)

**Supplement 1.**

Table S1. Detailed information on the included studies.

| <i>Study</i>                 | <i>Citation</i> | <i>Countries</i>                                                              | <i>Populations</i> | <i>Settings</i>                  | <i>Design</i>   | <i>Costing year</i> | <i>Costs</i>               | <i>Total N</i> |
|------------------------------|-----------------|-------------------------------------------------------------------------------|--------------------|----------------------------------|-----------------|---------------------|----------------------------|----------------|
| <i>Afonso-Argiles (2020)</i> | [18]            | Estonia, Finland, France, Germany, Netherlands, Spain, Sweden, United Kingdom | Dementia           | Institution, Community, Combined | Cross-sectional | 2019                | A1                         | 1600           |
| <i>Amador (2014)</i>         | [19]            | United Kingdom                                                                | Dementia           | Institution                      | Prospective     | 2010                | A2, A1, B1                 | 122            |
| <i>Banerjee (2013)</i>       | [20]            | United Kingdom                                                                | Dementia           | Community                        | Trial           | 2010                | C, AB, ABC                 | 84             |
| <i>Boada (1999)</i>          | [21]            | Spain                                                                         | AD                 | Community                        | Cross-sectional | 1996                | C, A, B, ABC               | 337            |
| <i>Braun (2020)</i>          | [22]            | Austria                                                                       | Dementia           | Combined                         | Retrospective   | 2018                | C, AB                      | 1341           |
| <i>Brilleman (2013)</i>      | [23]            | United Kingdom                                                                | Dementia           | Combined                         | Retrospective   | 2008                | A2, A3, A                  | 415            |
| <i>Bruggenjurgen (2015)</i>  | [25]            | Germany                                                                       | AD                 | Combined                         | Retrospective   | 2008                | A2, A3, A1, B1, AB         | 20903          |
| <i>Bruno (2018)</i>          | [24]            | Italy                                                                         | AD                 | Community                        | Prospective     | 2013                | C, A, B, ABC               | 198            |
| <i>Caravau (2015)</i>        | [26]            | Portugal                                                                      | Dementia           | Institution                      | Retrospective   | 2012                | A1, A3, A2, B2, B1, AB     | 36             |
| <i>Cavallo (1997)</i>        | [27]            | Italy                                                                         | AD                 | Community                        | Cross-sectional | 1995                | C, B1, B2                  | 423            |
| <i>Charlesworth (2008)</i>   | [28]            | United Kingdom                                                                | Dementia           | Combined                         | Trial           | 2005                | C, A3, A1, A2, B2          | 116            |
| <i>Chiatti (2015)</i>        | [29]            | Italy                                                                         | AD                 | Community                        | Trial           | 2013                | C, A2, A3, A1, B2          | 438            |
| <i>Coduras (2010)</i>        | [30]            | Spain                                                                         | AD                 | Combined                         | Prospective     | 2006                | C, A2, A1, A3, B1, B2, ABC | 520            |
| <i>D'Amico (2015)</i>        | [31]            | United Kingdom                                                                | Dementia           | Combined                         | Trial           | 2011                | A3, A1, B2                 | 104            |
| <i>D'Amico (2016)</i>        | [32]            | United Kingdom                                                                | Dementia           | Combined                         | Trial           | 2011                | C, A3, A1, B2, B1, AB, ABC | 22             |
| <i>Dahlrup (2014)</i>        | [33]            | Sweden                                                                        | Dementia           | Combined                         | Prospective     | 2010                | B                          | 155            |
| <i>Darba (2015)</i>          | [34]            | Spain                                                                         | AD                 | Combined                         | Cross-sectional | 2013                | C1, C2, A, B, ABC          | 339            |

|                                |      |                                                  |          |                                  |                 |      |                              |       |
|--------------------------------|------|--------------------------------------------------|----------|----------------------------------|-----------------|------|------------------------------|-------|
| <i>Dodel (2015)</i>            | [35] | France, United Kingdom, Germany                  | AD       | Community                        | Cross-sectional | 2010 | C, A2, A1, A3, A, B2, B1     | 1497  |
| <i>Ersek (2010)</i>            | [36] | Hungary                                          | Dementia | Community                        | Cross-sectional | 2007 | A2, A3, A1, B2, C2, C1, A    | 74    |
| <i>Farre (2016)</i>            | [37] | Spain                                            | Dementia | Community                        | Cross-sectional | 2010 | C, A3, A1, A2, B2, B, ABC    | 136   |
| <i>Farre (2018)</i>            | [38] | Spain                                            | Dementia | Combined, Community, Institution | Cross-sectional | 2013 | C1                           | 287   |
| <i>Ferry (2018)</i>            | [39] | United Kingdom                                   | Dementia | Community                        | Trial           | 2016 | A2, A1, B2                   | 30    |
| <i>Frahm-Falkenberg (2016)</i> | [40] | Denmark                                          | Dementia | Combined                         | Retrospective   | 2009 | A2, A1, A3                   | 78715 |
| <i>Francois (2004)</i>         | [41] | Finland                                          | Dementia | Community, Institution           | Cross-sectional | 2001 | ABC                          | 137   |
| <i>Garcia-Garcia (2021)</i>    | [42] | Spain                                            | Dementia | Institution                      | Prospective     | 2021 | A3                           | 43    |
| <i>Gerves (2014)</i>           | [43] | France                                           | AD       | Community                        | Cross-sectional | 2009 | C, A, B, ABC                 | 54    |
| <i>Gillespie (2013)</i>        | [44] | Ireland                                          | AD       | Community                        | Cross-sectional | 2008 | C, A1, A2, B2, AB, ABC       | 100   |
| <i>Gola (2020)</i>             | [45] | United Kingdom                                   | Dementia | Institution                      | Prospective     | 2012 | AB                           | 43    |
| <i>Graff (2008)</i>            | [46] | Netherlands                                      | Dementia | Community                        | Trial           | 2004 | C, A2, A1, B2, B1, ABC       | 65    |
| <i>Gustavsson (2010)</i>       | [2]  | Northern Europe, Western Europe, Southern Europe | AD       | Community                        | Prospective     | 2006 | C, A1, A, A3, B2, B1, B, ABC | 1642  |
| <i>Gustavsson (2011)</i>       | [47] | United Kingdom, Sweden, Spain                    | AD       | Community, Institution           | Cross-sectional | 2007 | C1, C, A1, A2, A3, B1, B2    | 862   |
| <i>Gustavsson (2012)</i>       | [48] | Sweden                                           | AD       | Community, Institution, Combined | Prospective     | 2005 | ABC                          | 870   |
| <i>Handels (2013)</i>          | [49] | Netherlands                                      | Dementia | Community                        | Trial           | 2005 | C, A2, A3, A1, B2, B1, AB    | 219   |

|                                 |      |                                                                                |                    |                        |                 |      |                                  |      |
|---------------------------------|------|--------------------------------------------------------------------------------|--------------------|------------------------|-----------------|------|----------------------------------|------|
| <i>Handels (2018)</i>           | [50] | Portugal, Germany, United Kingdom, Norway, Netherlands, Italy, Sweden, Ireland | Dementia           | Community              | Cross-sectional | 2015 | C1, C, C2, A1, A2, B1, B2        | 453  |
| <i>Happich (2016)</i>           | [51] | United Kingdom                                                                 | VaD, prior AD, VaD | Combined               | Retrospective   | 2013 | A2, A3, A1, A                    | 2049 |
| <i>Henderson (2019)</i>         | [52] | United Kingdom                                                                 | Dementia           | Combined               | Prospective     | 2015 | C1, C2, A3, A2, A1, B2, AB       | 1547 |
| <i>Holmerova (2017)</i>         | [53] | Czechia                                                                        | Dementia           | Combined               | Cross-sectional | 2015 | C, A2, A1, A3, B2, B1            | 119  |
| <i>Howard (2021)</i>            | [54] | United Kingdom                                                                 | Dementia           | Community              | Trial           | 2016 | C, A3, A2, A1, B2, AB, ABC       | 223  |
| <i>Jakobsen (2011)</i>          | [55] | Denmark                                                                        | Dementia           | Combined               | Cross-sectional | 2010 | C                                | 297  |
| <i>Jetsonen (2021)</i>          | [56] | Finland                                                                        | AD                 | Community              | Trial           | 2016 | C, AB, ABC                       | 231  |
| <i>Joling (2015)</i>            | [57] | Netherlands                                                                    | Dementia           | Community              | Prospective     | 2009 | C1, C2, A3, A2, A1, B2           | 192  |
| <i>Jones (2015)</i>             | [58] | United Kingdom                                                                 | AD                 | Combined               | Cross-sectional | 2010 | A, B                             | 249  |
| <i>Jönsson (1999)</i>           | [60] | Sweden                                                                         | Dementia           | Combined               | Prospective     | 1998 | A3, B1, B2                       | 206  |
| <i>Jönsson (2006)</i>           | [59] | Nordics                                                                        | AD                 | Combined               | Prospective     | 2003 | C1, C2, A3, A1, A2, B1, B2, ABC  | 270  |
| <i>Khan (2019)</i>              | [61] | United Kingdom                                                                 | Dementia           | Combined               | Trial           | 2015 | C1, A2, A3, A1, B2, B1, ABC      | 136  |
| <i>Kiencke (2011)</i>           | [62] | Germany                                                                        | AD                 | Combined               | Retrospective   | 2005 | A2, A3, A1, A, B2, AB            | 1581 |
| <i>Knapp (2016)</i>             | [63] | United Kingdom                                                                 | Dementia           | Combined               | Retrospective   | 2011 | A1, B1                           | 3075 |
| <i>Knapp (2017)</i>             | [64] | United Kingdom                                                                 | AD                 | Community              | Trial           | 2014 | C, A1, B2, AB, ABC               | 72   |
| <i>König (2014)</i>             | [65] | Germany                                                                        | Dementia           | Institution, Community | Cross-sectional | 2008 | C, A2, A3, A1, A, B2, B1, B, ABC | 301  |
| <i>Kronborg Andersen (1999)</i> | [66] | Denmark                                                                        | Dementia           | Combined               | Prospective     | 1997 | A2, A1, B2, AB                   | 245  |

|                               |      |                |          |                                        |                 |      |                                                   |     |
|-------------------------------|------|----------------|----------|----------------------------------------|-----------------|------|---------------------------------------------------|-----|
| <i>Leicht (2011)</i>          | [67] | Germany        | Dementia | Combined                               | Cross-sectional | 2008 | C, A2, A3,<br>A1, A, B1,<br>B2, B, ABC            | 176 |
| <i>Lenox-Smith (2016)</i>     | [68] | United Kingdom | AD       | Community                              | Prospective     | 2010 | C, A, B, ABC                                      | 408 |
| <i>Livingston (2004)</i>      | [70] | United Kingdom | AD       | Combined                               | Prospective     | 2003 | ABC                                               | 224 |
| <i>Livingston (2014)</i>      | [69] | United Kingdom | Dementia | Community                              | Trial           | 2009 | A2, A1, B2,<br>B1, AB                             | 67  |
| <i>Longo (2019)</i>           | [71] | United Kingdom | Dementia | Community                              | Cross-sectional | 2016 | C, A2, A, A1,<br>B2, B                            | 323 |
| <i>Lopez-Bastida (2006)</i>   | [72] | Spain          | AD       | Combined                               | Cross-sectional | 2001 | C, C1, A1,<br>A2, A3, B2,<br>B1                   | 237 |
| <i>Luz Pires (2020)</i>       | [73] | Portugal       | Dementia | Community                              | Prospective     | 2016 | C                                                 | 123 |
| <i>MacNeil Vroomen (2016)</i> | [74] | Netherlands    | Dementia | Community                              | Trial           | 2010 | C, A2, A3,<br>A1, B2, B1,<br>ABC                  | 73  |
| <i>Meeuwssen (2013)</i>       | [75] | Netherlands    | Dementia | Community                              | Trial           | 2009 | C1, C2, A2,<br>A3, A1, B2,<br>B1, ABC             | 83  |
| <i>Menn (2012)</i>            | [76] | Germany        | Dementia | Community                              | Trial           | 2008 | C, A1, A3,<br>A2, B1, B2,<br>ABC                  | 171 |
| <i>Mesterton (2010)</i>       | [77] | Sweden         | AD       | Combined,<br>Community,<br>Institution | Cross-sectional | 2007 | B1, B2, A3,<br>A1, C2, A2,<br>C1, C, A, B,<br>ABC | 233 |
| <i>Michalowsky (2014)</i>     | [78] | Germany        | Dementia | Community                              | Trial           | 2013 | A3                                                | 205 |
| <i>Michalowsky (2018)</i>     | [79] | Germany        | Dementia | Community                              | Trial           | 2015 | C1, C2, C, A2,<br>A3, A1, A,<br>B1, B2, B,<br>ABC | 425 |
| <i>Morris (2015)</i>          | [80] | United Kingdom | AD       | Community                              | Prospective     | 2011 | AB                                                | 695 |
| <i>Mostardt (2012)</i>        | [81] | Germany        | Dementia | Community                              | Trial           | 2008 | A3, A2, A1,<br>B2, AB                             | 76  |
| <i>Mueller (2018)</i>         | [82] | United Kingdom | AD, DLB  | Community                              | Retrospective   | 2013 | A1                                                | 970 |
| <i>Neubert (2021)</i>         | [83] | Germany        | Dementia | Combined                               | Prospective     | 2015 | C2, A2, A3,<br>A1, B2, B1                         | 154 |

|                               |       |                |          |                           |                 |      |                                     |       |
|-------------------------------|-------|----------------|----------|---------------------------|-----------------|------|-------------------------------------|-------|
| <i>O'Shea (2017)</i>          | [84]  | Ireland        | Dementia | Community                 | Prospective     | 2013 | C, A2, B2, B1                       | 181   |
| <i>Oberfrank (2014)</i>       | [85]  | Hungary        | Dementia | Combined                  | Retrospective   | 2010 | A1, A3, AB                          | 60702 |
| <i>Olazaran (2017)</i>        | [86]  | Spain          | AD       | Combined                  | Prospective     | 2013 | C1, C, A1,<br>A2, A3, B1,<br>B2     | 380   |
| <i>Panca (2019)</i>           | [87]  | United Kingdom | AD       | Institution               | Cross-sectional | 2015 | A1, A2, A3,<br>B2                   | 1421  |
| <i>Paraponaris (2015)</i>     | [88]  | France         | Dementia | Community                 | Cross-sectional | 2008 | C, AB                               | 513   |
| <i>Pena-Longobardo (2015)</i> | [89]  | Spain          | AD       | Combined                  | Cross-sectional | 2008 | C                                   | 904   |
| <i>Rapp (2012)</i>            | [91]  | France         | AD       | Community                 | Trial           | 2007 | C, A, B, ABC                        | 815   |
| <i>Rapp (2018)</i>            | [90]  | France         | AD       | Community                 | Prospective     | 2010 | C, A, B                             | 414   |
| <i>Reed (2017)</i>            | [92]  | Germany        | AD       | Community                 | Prospective     | 2010 | ABC                                 | 552   |
| <i>Reese (2011)</i>           | [93]  | Germany        | Dementia | Community,<br>Institution | Cross-sectional | 2009 | A2, A3, A1,<br>A, B2, C1, C,<br>ABC | 395   |
| <i>Reina (2019)</i>           | [97]  | Spain          | Dementia | Combined                  | Cross-sectional | 2012 | C, AB                               | 778   |
| <i>Rigaud (2003)</i>          | [16]  | France         | AD       | Community                 | Cross-sectional | 1996 | C, A, B                             | 50    |
| <i>Romeo (2017)</i>           | [94]  | United Kingdom | Dementia | Institution               | Trial           | 2012 | A2, A3, A1,<br>A, B2, B1            | 277   |
| <i>Rosenvall (2020)</i>       | [95]  | Finland        | AD       | Combined                  | Retrospective   | 2011 | A1, B2, B1                          | 924   |
| <i>Rubinsztein (2015)</i>     | [96]  | United Kingdom | Dementia | Community                 | Retrospective   | 2011 | A2, A3, A, B2                       | 66    |
| <i>Schulenberg (1998)</i>     | [98]  | Germany        | AD       | Combined                  | Cross-sectional | 1995 | A2, A1, A3                          | 158   |
| <i>Schwarzkopf (2011)</i>     | [99]  | Germany        | Dementia | Community                 | Trial           | 2008 | C, A2, A3,<br>A1, B1, AB,<br>ABC    | 382   |
| <i>Schwarzkopf (2012)</i>     | [101] | Germany        | Dementia | Combined                  | Retrospective   | 2006 | A, A2, A3,<br>A1, B1, AB            | 9147  |
| <i>Schwarzkopf (2013)</i>     | [100] | Germany        | Dementia | Community,<br>Institution | Retrospective   | 2006 | A, A2, A3,<br>A1, B1, AB            | 5093  |
| <i>Scuvee-Moreau (2002)</i>   | [102] | Belgium        | Dementia | Community,<br>Institution | Prospective     | 2002 | A2, A1, A3                          | 386   |
| <i>Sögaard (2014)</i>         | [108] | Denmark        | AD       | Community                 | Trial           | 2008 | C1, C, A2,<br>A1, B1, ABC           | 167   |
| <i>Sopina (2019)</i>          | [103] | Denmark        | AD       | Combined                  | Retrospective   | 2016 | A2, A3, A1                          | 26951 |

|                             |       |                |          |                                        |                 |      |                                  |       |
|-----------------------------|-------|----------------|----------|----------------------------------------|-----------------|------|----------------------------------|-------|
| <i>Soto-Gordoa (2014)</i>   | [104] | Spain          | Dementia | Institution,<br>Community              | Retrospective   | 2008 | B                                | 2957  |
| <i>Souetre (1995)</i>       | [106] | France         | AD       | Community                              | Cross-sectional | 1991 | C, A2, A3,<br>A1, B2             | 51    |
| <i>Souetre (1999)</i>       | [105] | United Kingdom | AD       | Community                              | Cross-sectional | 1999 | C2, A1, A2,<br>A3, B1, B2        | 128   |
| <i>Steinbeisser (2020)</i>  | [107] | Germany        | Dementia | Community                              | Trial           | 2014 | C1, C2, C, B2,<br>AB, ABC        | 171   |
| <i>Taipale (2016)</i>       | [109] | Finland        | AD       | Combined                               | Retrospective   | 2011 | A1, A3                           | 70718 |
| <i>Trabucchi (1999)</i>     | [110] | Italy          | AD       | Community                              | Prospective     | 1996 | C, A1, A3,<br>B2, B1             | 103   |
| <i>Turro-Garriga (2010)</i> | [113] | Spain          | Dementia | Community                              | Prospective     | 2006 | C                                | 169   |
| <i>Turro-Garriga (2015)</i> | [111] | Spain          | Dementia | Community,<br>Combined,<br>Institution | Retrospective   | 2008 | A3                               | 1459  |
| <i>Turro-Garriga (2016)</i> | [112] | Spain          | Dementia | Combined                               | Prospective     | 2010 | C, B2, B,<br>ABC                 | 514   |
| <i>Turro-Garriga (2020)</i> | [114] | Spain          | AD       | Community                              | Cross-sectional | 2019 | C, A2, A1, B2                    | 147   |
| <i>van de Ven (2014)</i>    | [115] | Netherlands    | Dementia | Institution                            | Trial           | 2010 | A3, A2, A1,<br>A, B2             | 164   |
| <i>van Santen (2021)</i>    | [116] | Netherlands    | Dementia | Community                              | Trial           | 2016 | ABC                              | 39    |
| <i>Vandepitte (2020)</i>    | [117] | Belgium        | Dementia | Community                              | Cross-sectional | 2018 | C, A1, A2,<br>B2, B1, ABC        | 355   |
| <i>Vossius (2014)</i>       | [118] | Norway         | Dementia | Community                              | Prospective     | 2010 | B1, B2, AB                       | 109   |
| <i>Vossius (2019)</i>       | [119] | Norway         | Dementia | Community                              | Prospective     | 2017 | C, AB, ABC                       | 181   |
| <i>Vroomen (2016)</i>       | [120] | Netherlands    | Dementia | Community                              | Trial           | 2010 | C, A2, A1,<br>A3, B2, B1,<br>ABC | 73    |
| <i>Walsh (2019)</i>         | [121] | Ireland        | Dementia | Community                              | Prospective     | 2015 | C, A2, A1,<br>B2, ABC            | 253   |
| <i>Wimo (2009)</i>          | [122] | Sweden         | Dementia | Combined                               | Prospective     | 2005 | C, A, B1, B2,<br>ABC             | 178   |
| <i>Wimo (2003)</i>          | [123] | Sweden         | VaD, AD  | Combined                               | Prospective     | 2005 | C, ABC, AB                       | 183   |
| <i>Wohlgemuth (2020)</i>    | [124] | Germany        | Dementia | Community                              | Trial           | 2015 | A, B, AB                         | 424   |
| <i>Woods (2012)</i>         | [125] | United Kingdom | Dementia | Community                              | Trial           | 2010 | A2, A1, B2,<br>AB                | 140   |

|                            |       |                                                                                              |          |                           |                 |      |                           |      |
|----------------------------|-------|----------------------------------------------------------------------------------------------|----------|---------------------------|-----------------|------|---------------------------|------|
| <i>Wolstenholme (2002)</i> | [15]  | United Kingdom                                                                               | Dementia | Combined                  | Cross-sectional | 1998 | A2, A1, B1,<br>B2, AB     | 100  |
| <i>Wubker (2015)</i>       | [126] | Estonia,<br>Netherlands,<br>Finland, France,<br>Sweden, United<br>Kingdom, Spain,<br>Germany | Dementia | Community,<br>Institution | Prospective     | 2010 | C, A, B2, B1,<br>ABC      | 1678 |
| <i>Åkerborg (2016)</i>     | [127] | Sweden                                                                                       | Dementia | Combined                  | Prospective     | 2012 | C, A1, A2,<br>B2, B1, ABC | 170  |

Abbreviations: AD – Alzheimers Disease; VaD – Vascular dementia;

Costs: A1 – Inpatient care; A2 – Outpatient care; A3 – Pharmaceuticals; A – Direct medical care; B1– Institutional care; B2 – Community care; B – Direct non-medical care; C1 – Caregiver work loss; C2 – Caregiver time; C – Indirect care, ABC – Total direct and informal care

Citation refers to the reference number in the main publication.



# Supplement 2

Eastern Europe & Baltics, Community, Mild, Inpatient care

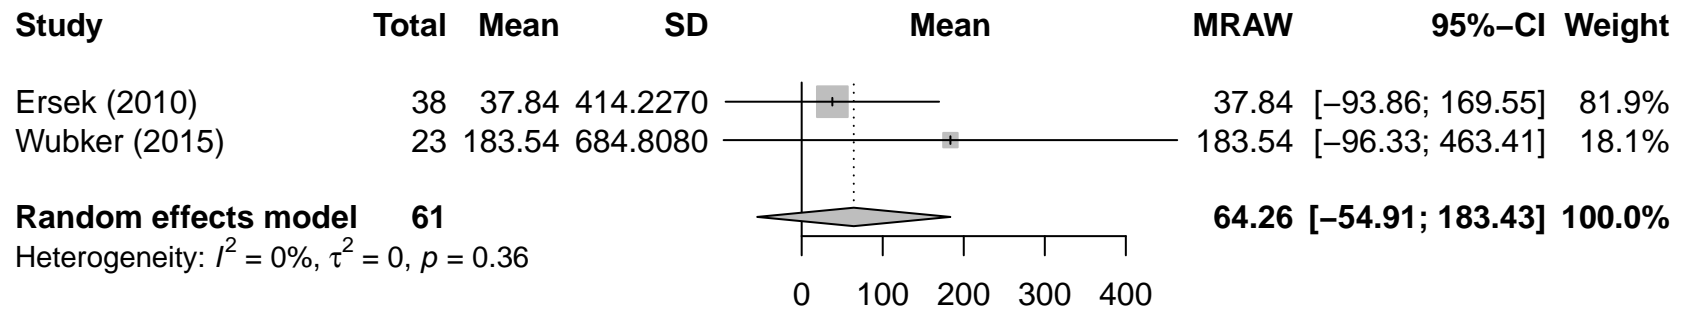

Eastern Europe & Baltics, Community, Mild, Outpatient care

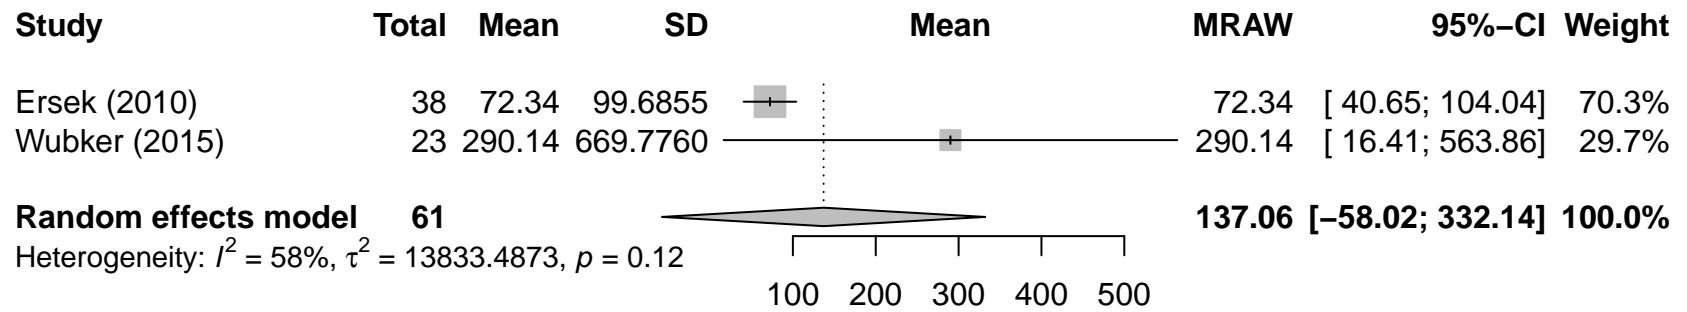

Eastern Europe & Baltics, Community, Mild, Pharmaceuticals

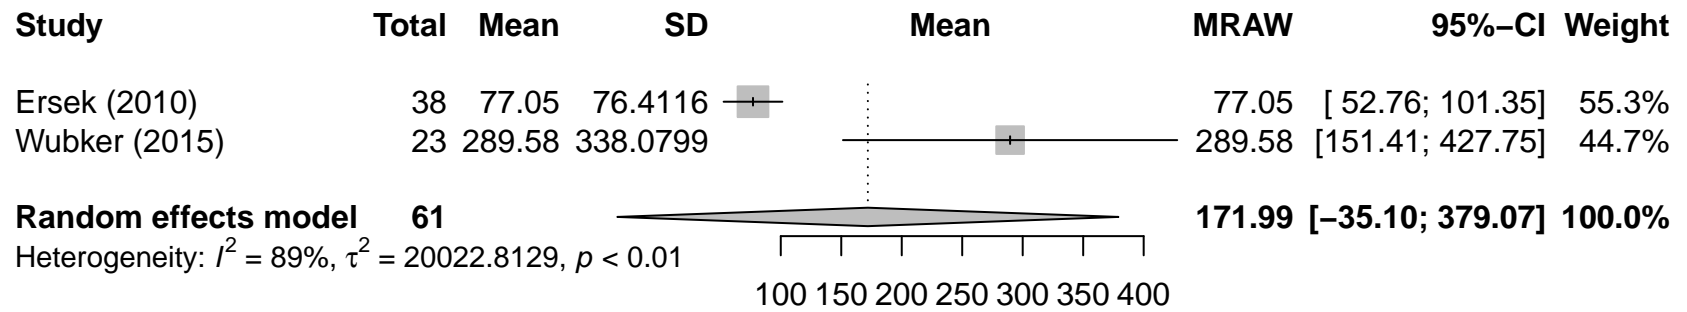

Eastern Europe & Baltics, Community, Mild, Institutional care

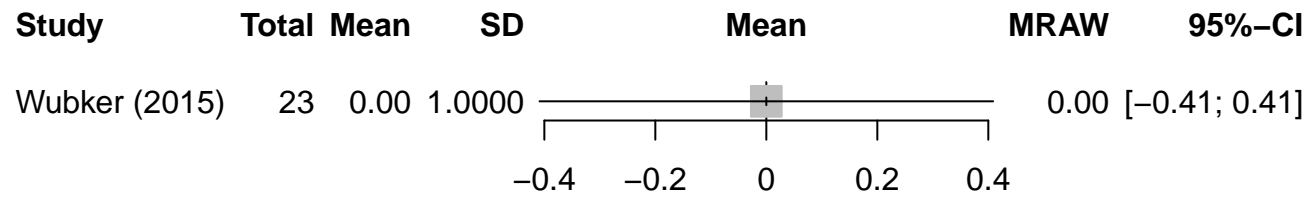

Eastern Europe & Baltics, Community, Mild, Community care

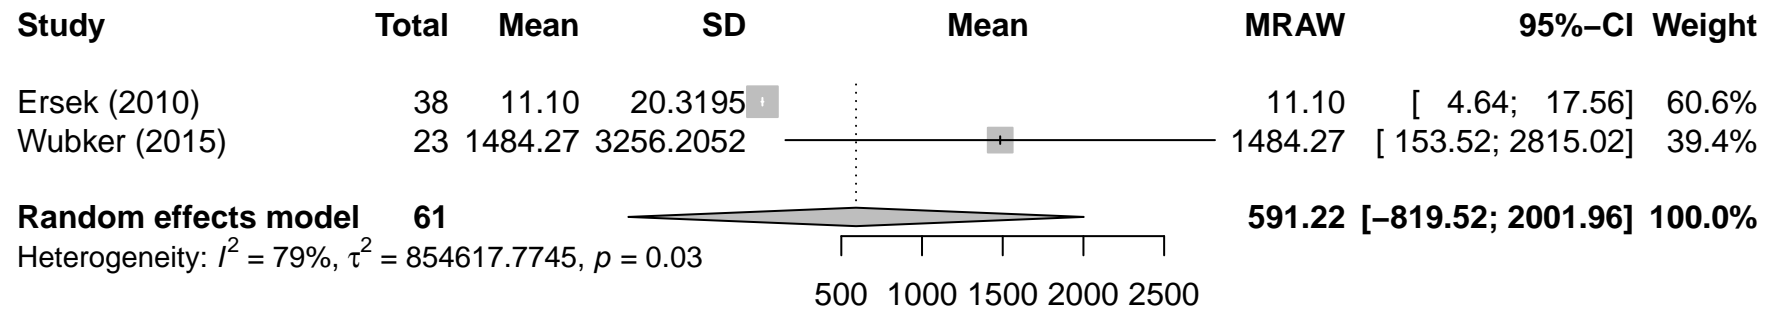

Eastern Europe & Baltics, Community, Mild, Caregiver work loss

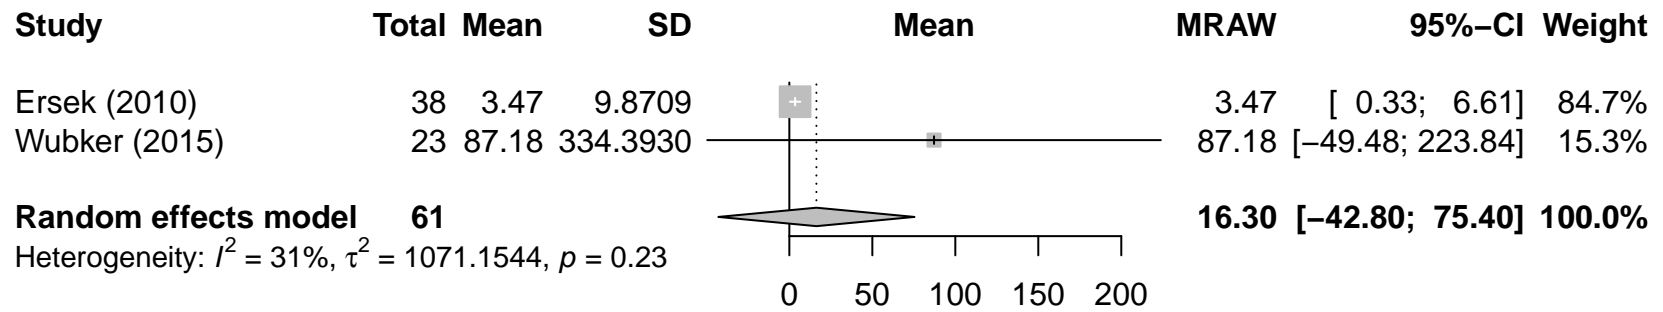

Eastern Europe & Baltics, Community, Mild, Caregiver time

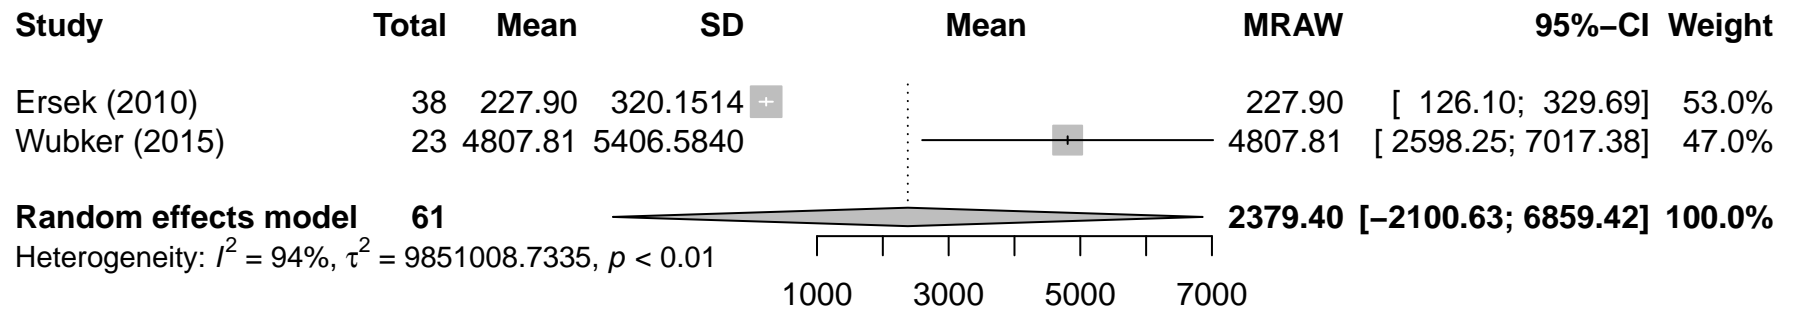

Eastern Europe & Baltics, Community, Moderate, Inpatient care

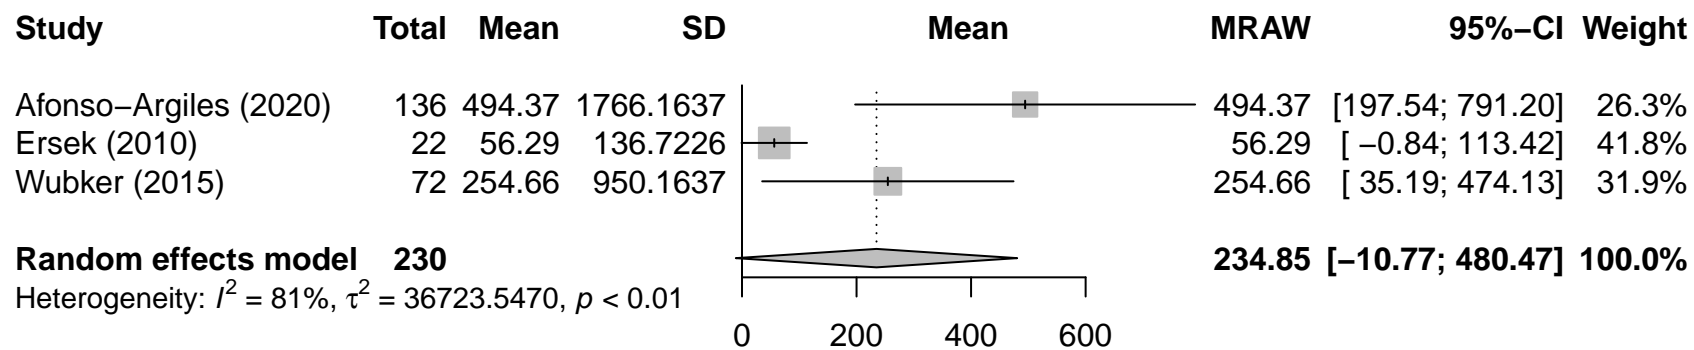



Eastern Europe & Baltics, Community, Moderate, Outpatient care

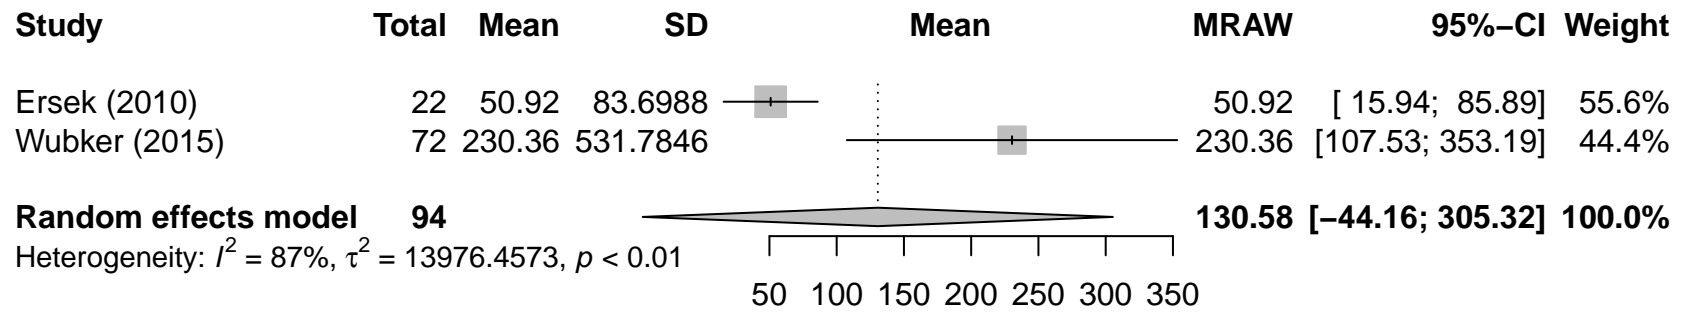

Eastern Europe & Baltics, Community, Moderate, Pharmaceuticals

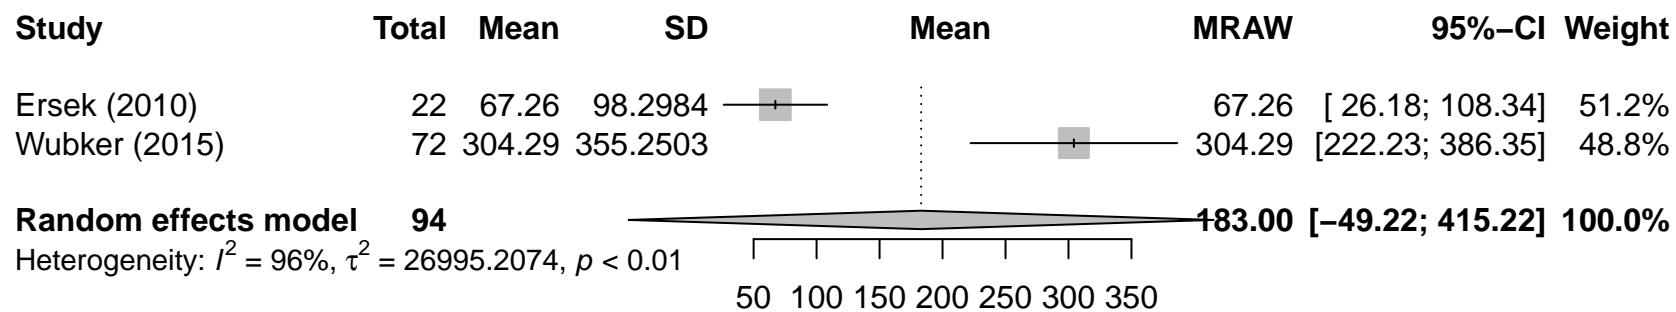

Eastern Europe & Baltics, Community, Moderate, Institutional care

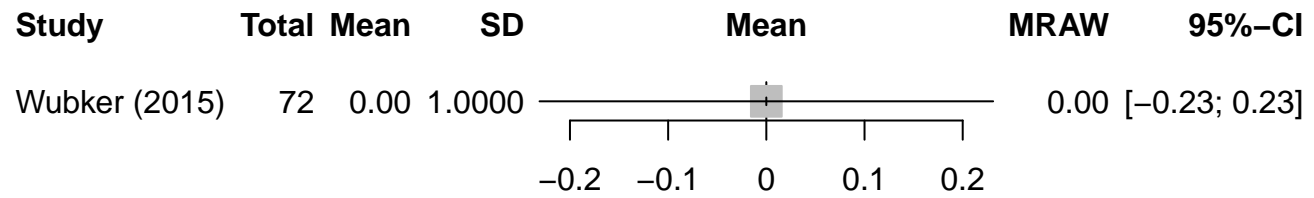

Eastern Europe & Baltics, Community, Moderate, Community care

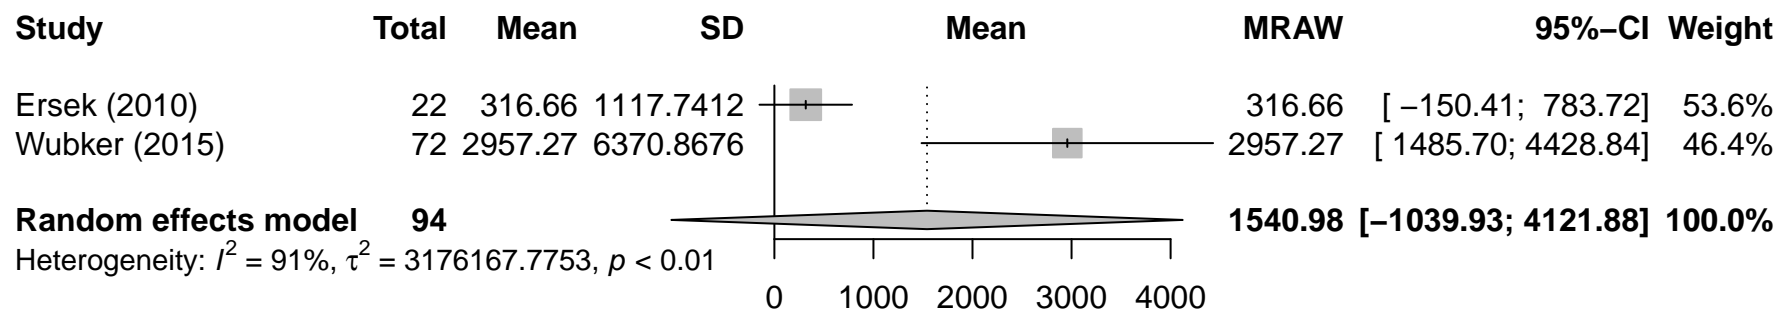

Eastern Europe & Baltics, Community, Moderate, Caregiver work loss

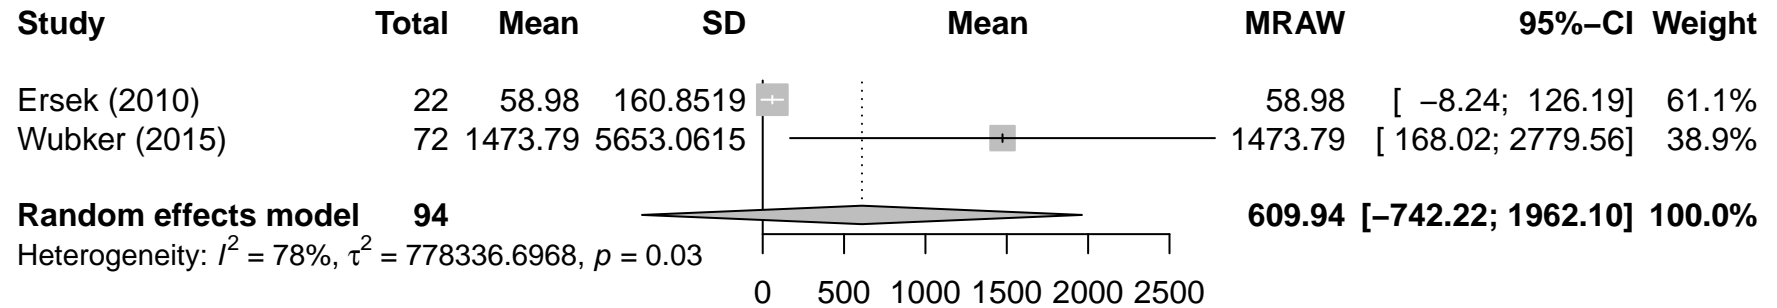

Eastern Europe & Baltics, Community, Moderate, Caregiver time

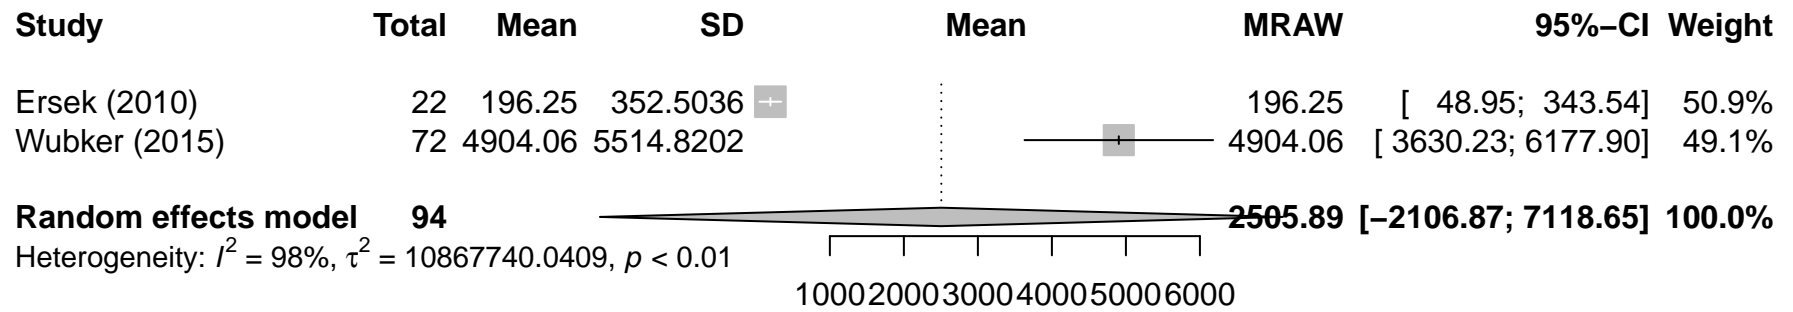

Eastern Europe & Baltics, Community, Severe, Inpatient care

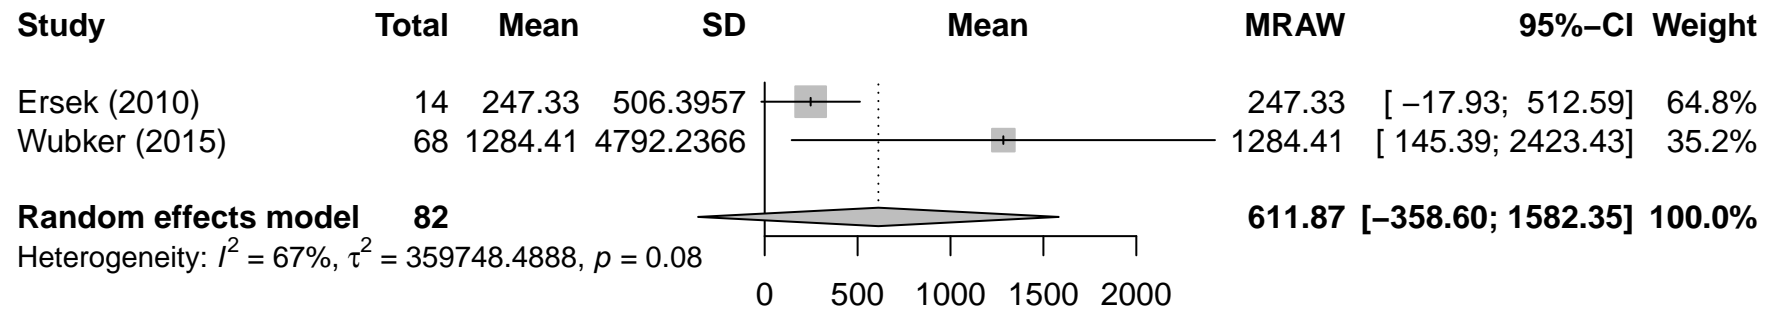

Eastern Europe & Baltics, Community, Severe, Outpatient care

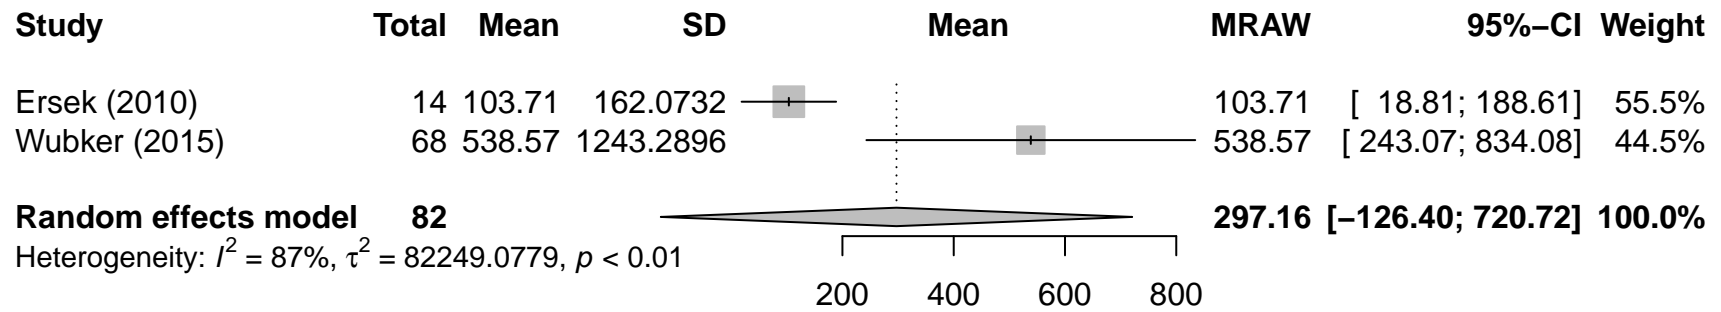



Eastern Europe & Baltics, Community, Severe, Pharmaceuticals

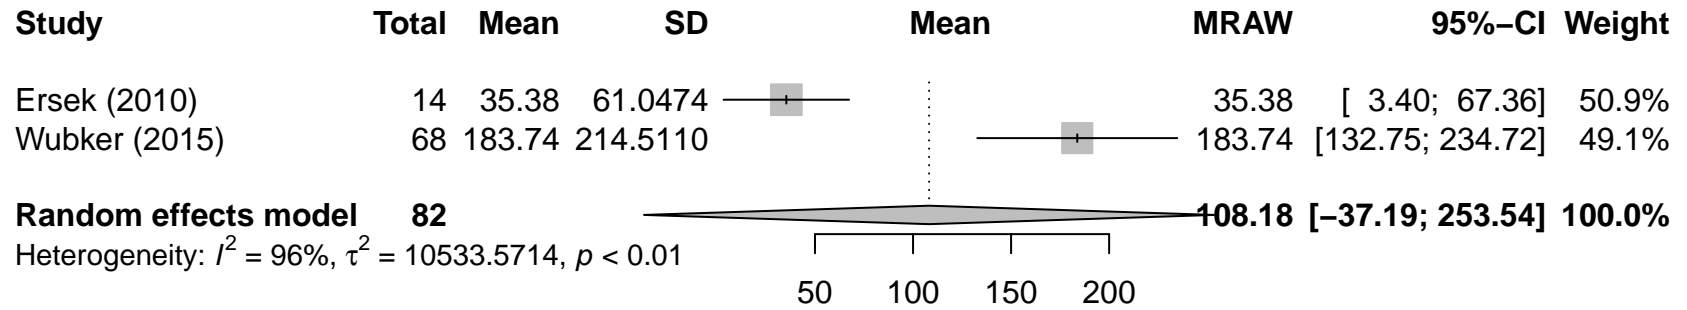

Eastern Europe & Baltics, Community, Severe, Institutional care

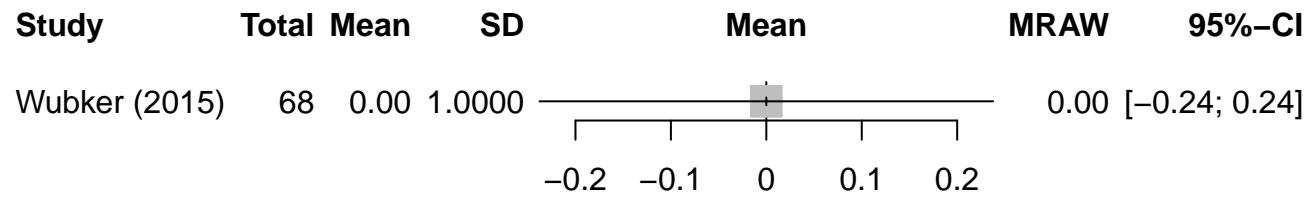

Eastern Europe & Baltics, Community, Severe, Community care

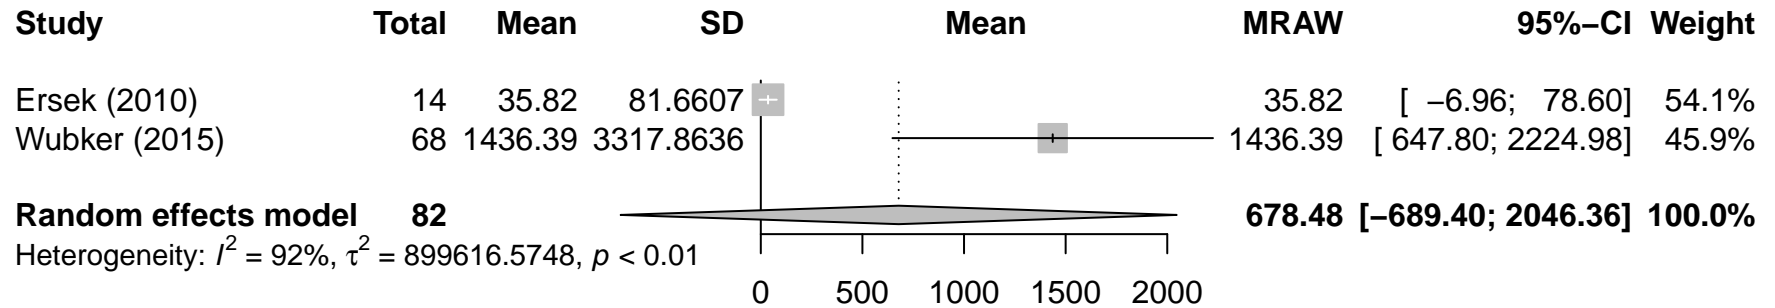

Eastern Europe & Baltics, Community, Severe, Caregiver work loss

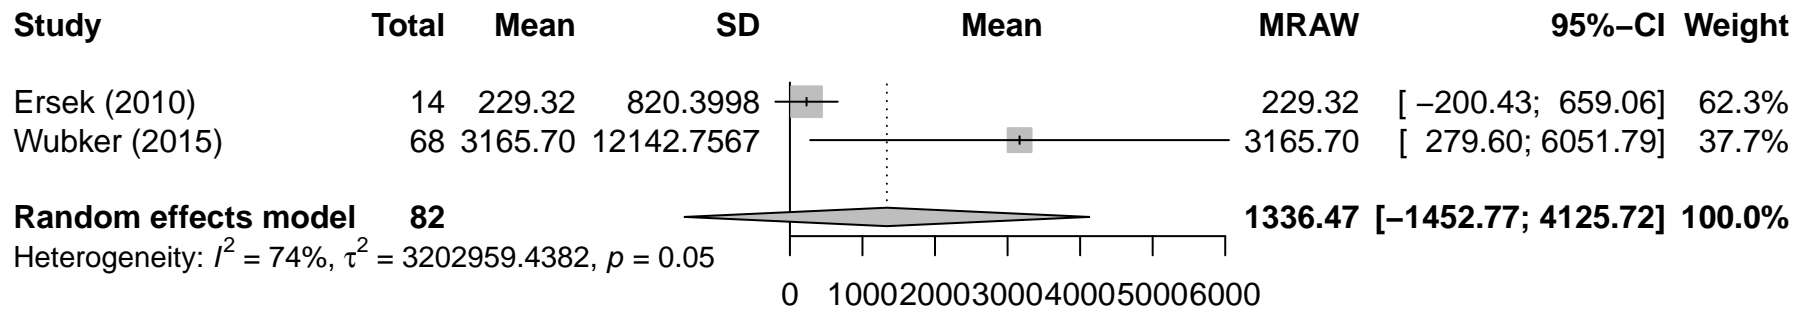

Eastern Europe & Baltics, Community, Severe, Caregiver time

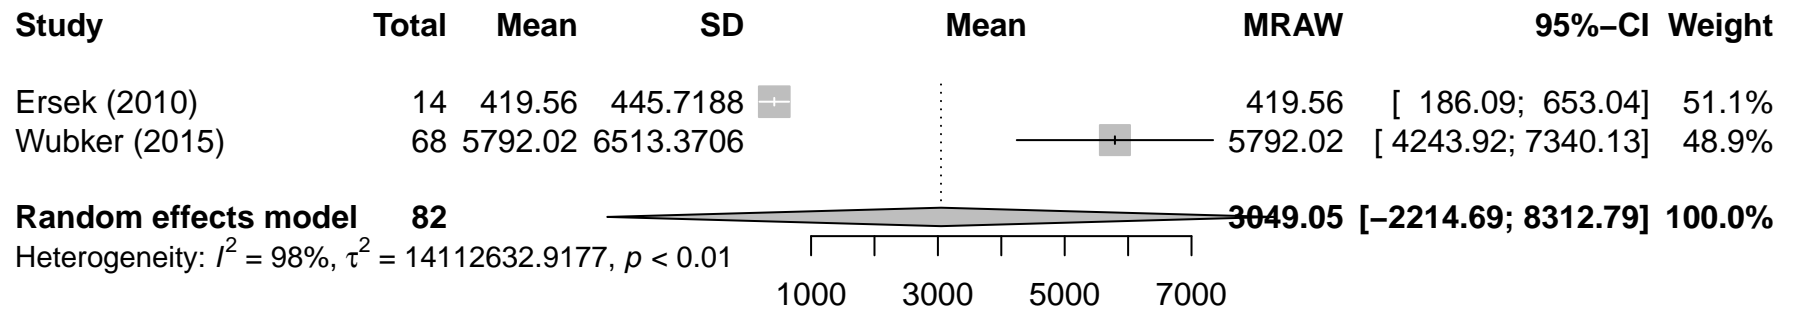

Eastern Europe & Baltics, Community, All, Inpatient care

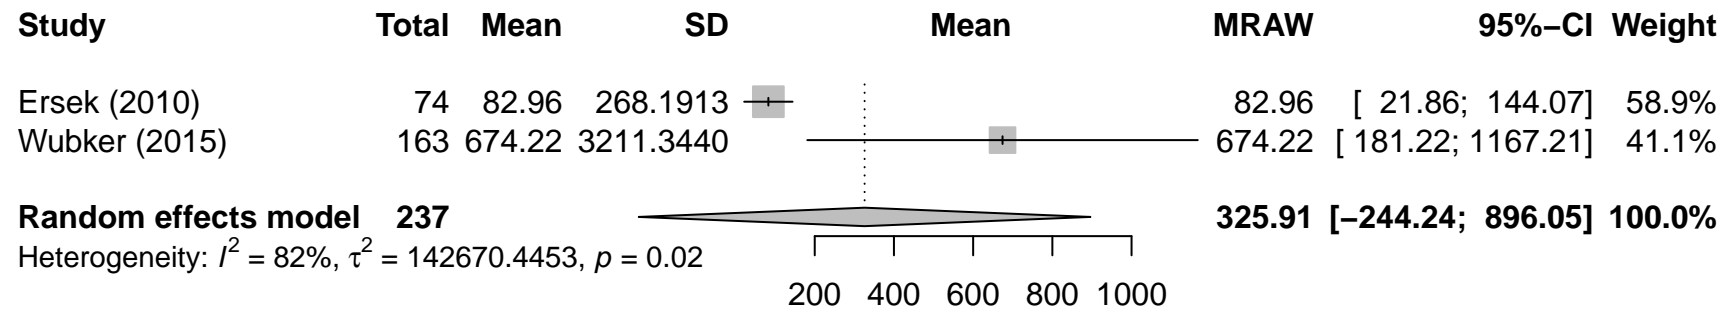

Eastern Europe & Baltics, Community, All, Outpatient care

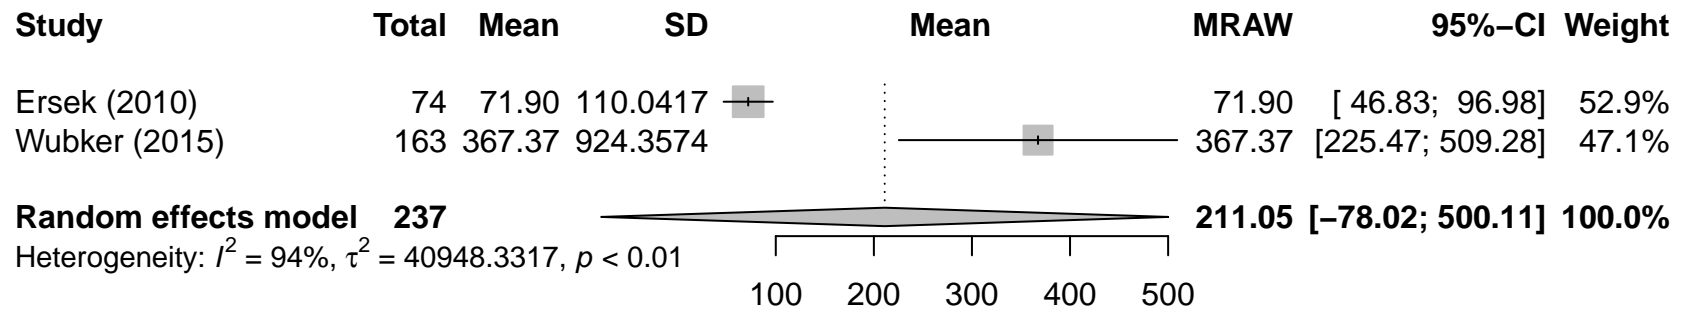

Eastern Europe & Baltics, Community, All, Pharmaceuticals

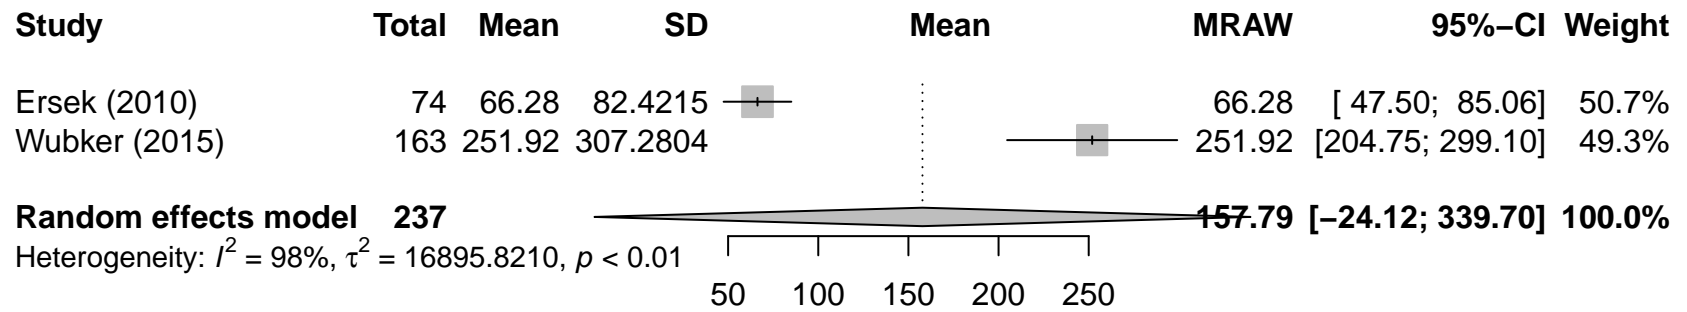



Eastern Europe & Baltics, Community, All, Institutional care

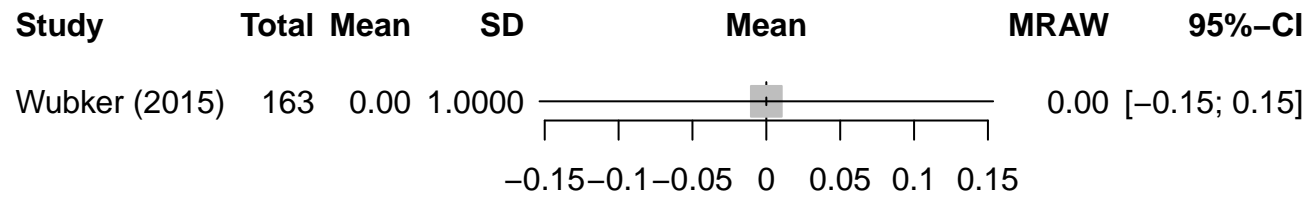

Eastern Europe & Baltics, Community, All, Community care

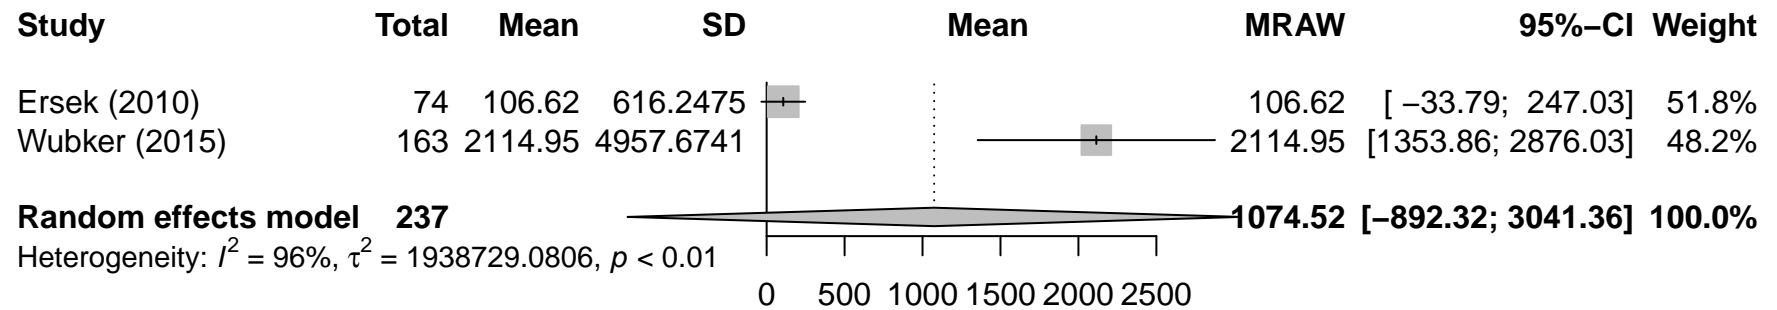

Eastern Europe & Baltics, Community, All, Caregiver work loss

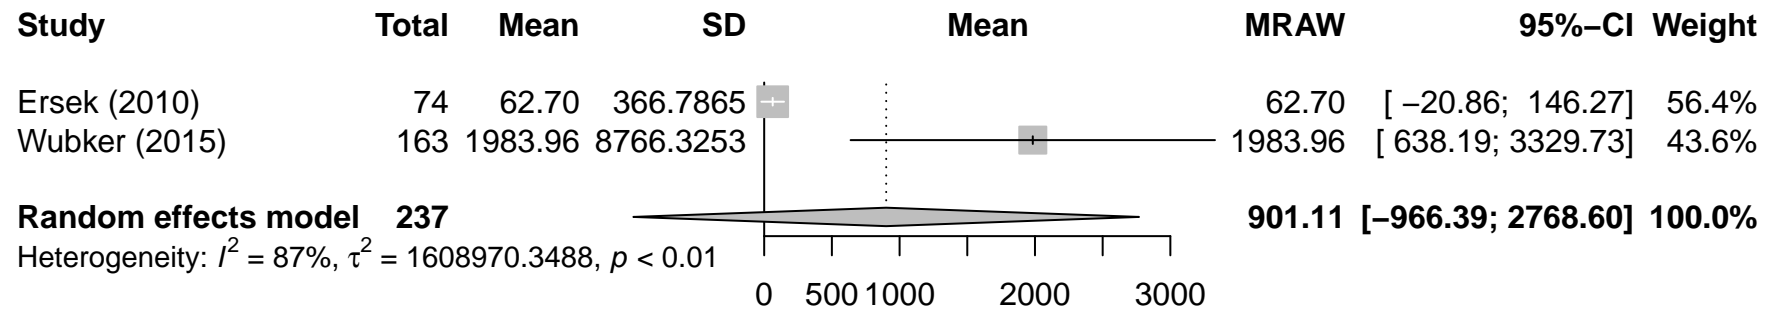

Eastern Europe & Baltics, Community, All, Caregiver time

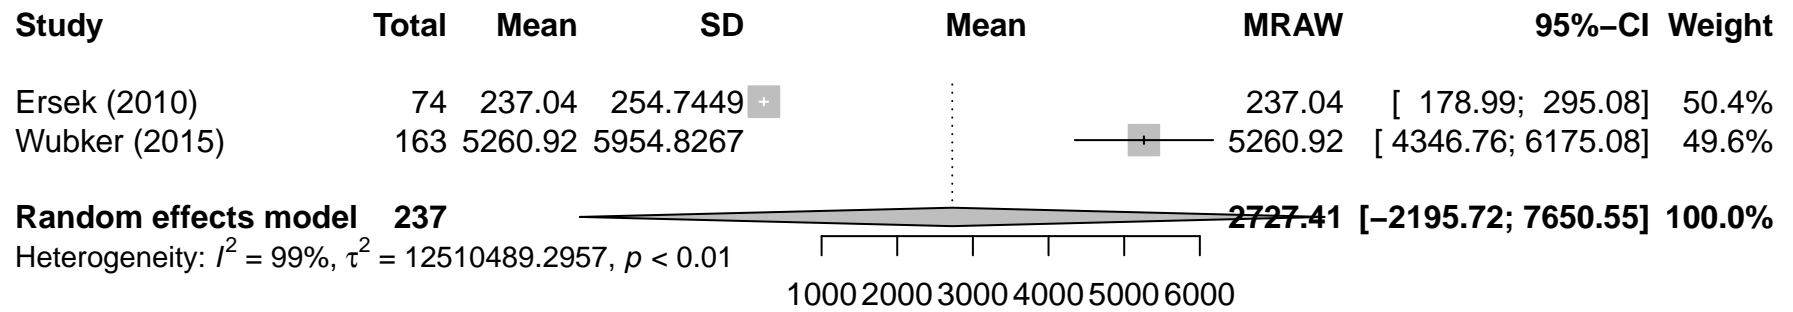

Eastern Europe & Baltics, Institution, Mild, Inpatient care

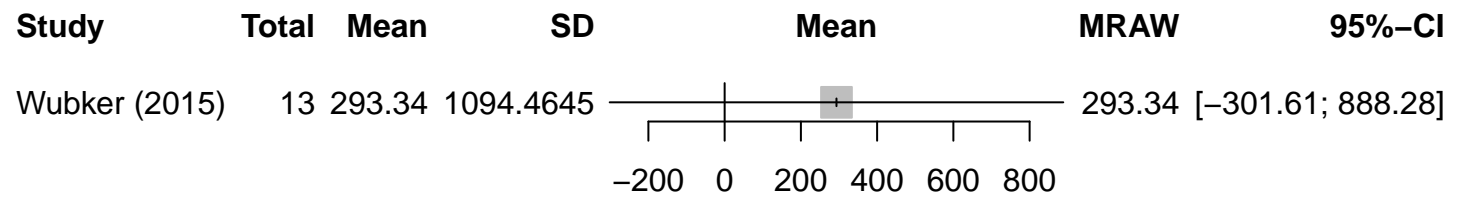

Eastern Europe & Baltics, Institution, Mild, Outpatient care

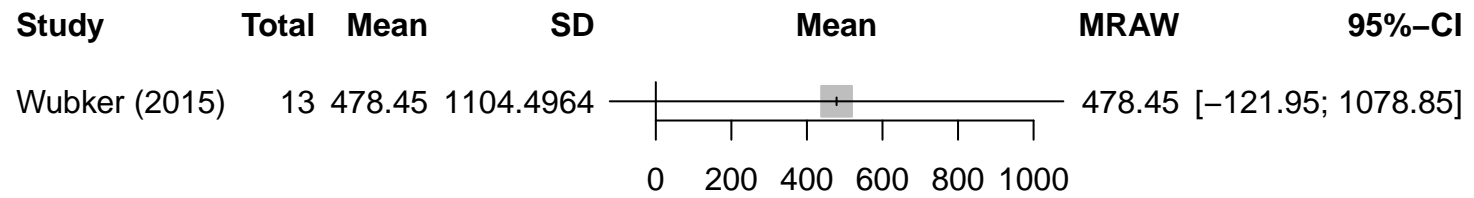

Eastern Europe & Baltics, Institution, Mild, Pharmaceuticals

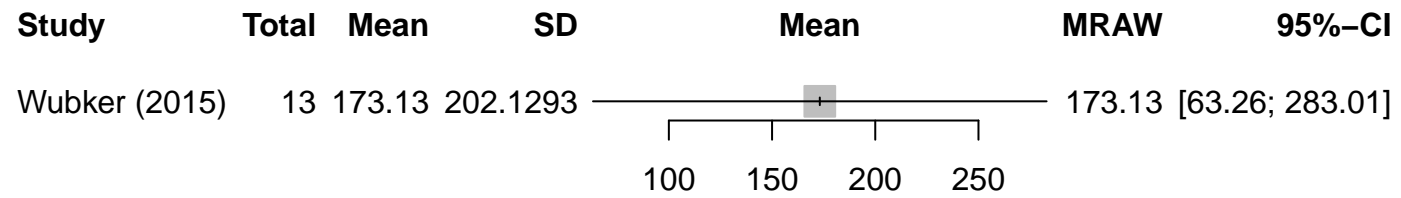

Eastern Europe & Baltics, Institution, Mild, Institutional care

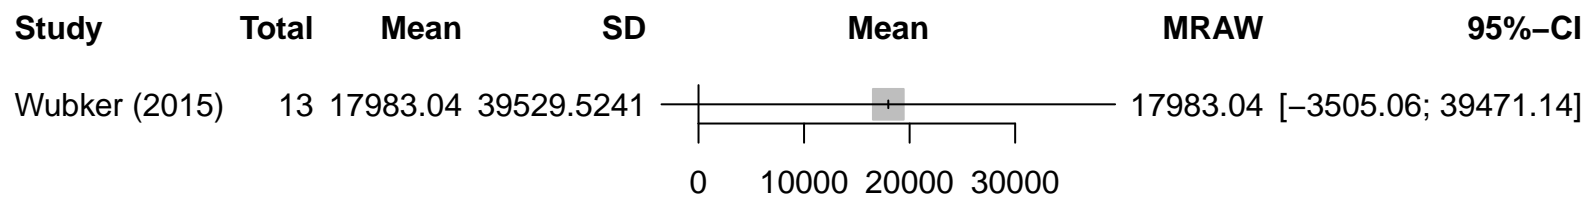



Eastern Europe & Baltics, Institution, Mild, Community care

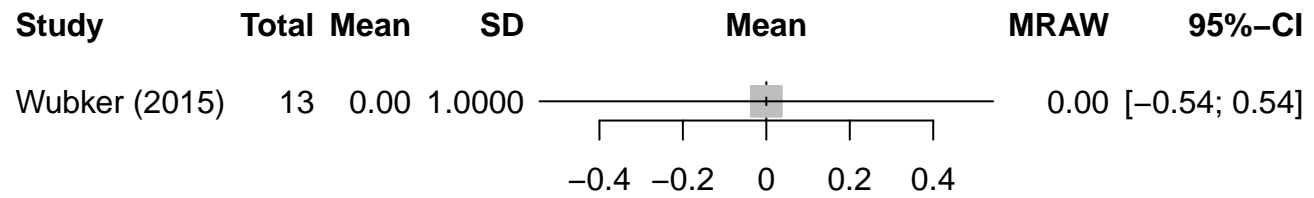

Eastern Europe & Baltics, Institution, Mild, Caregiver work loss



Eastern Europe & Baltics, Institution, Mild, Caregiver time



Eastern Europe & Baltics, Institution, Moderate, Inpatient care

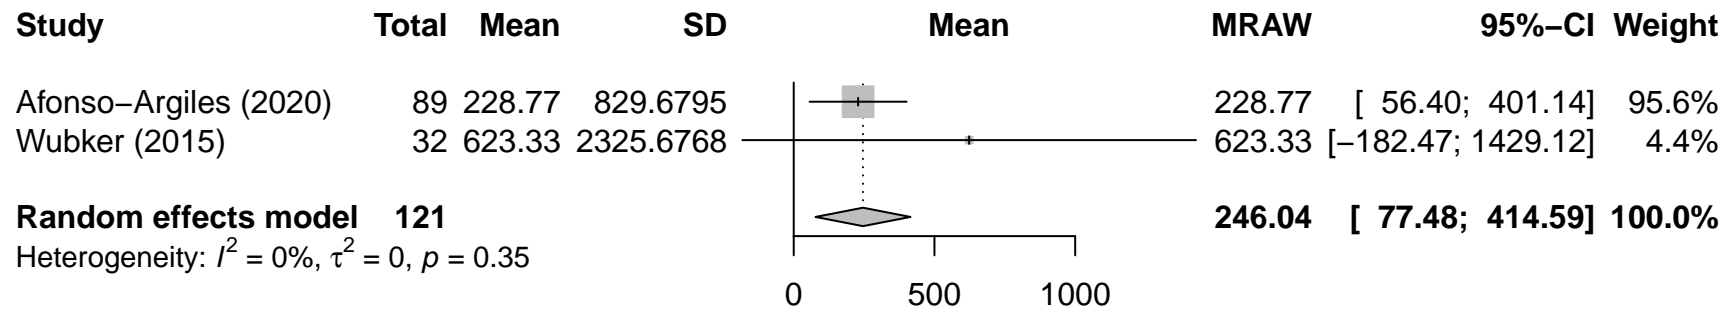

Eastern Europe & Baltics, Institution, Moderate, Outpatient care

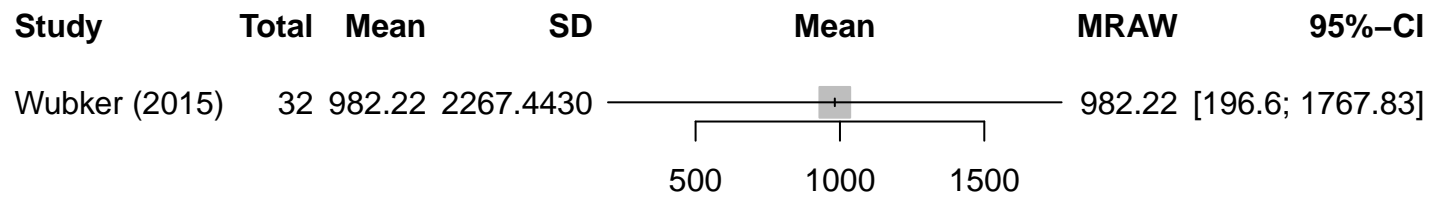

Eastern Europe & Baltics, Institution, Moderate, Pharmaceuticals

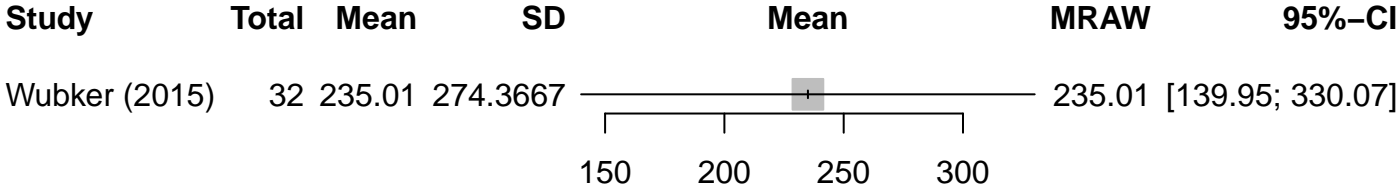

Eastern Europe & Baltics, Institution, Moderate, Institutional care

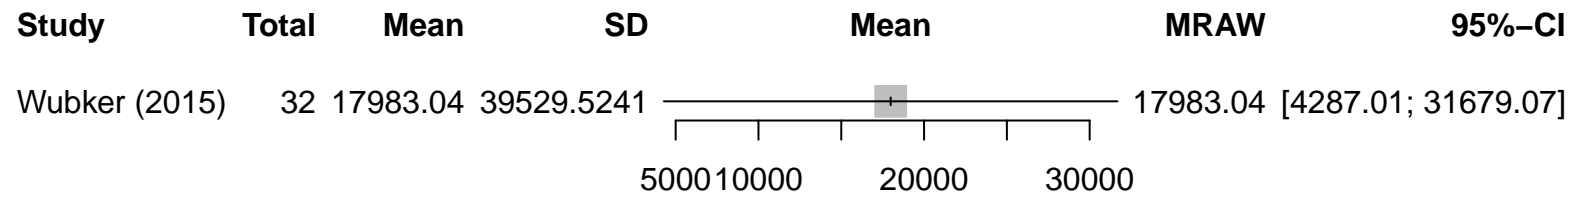

Eastern Europe & Baltics, Institution, Moderate, Community care

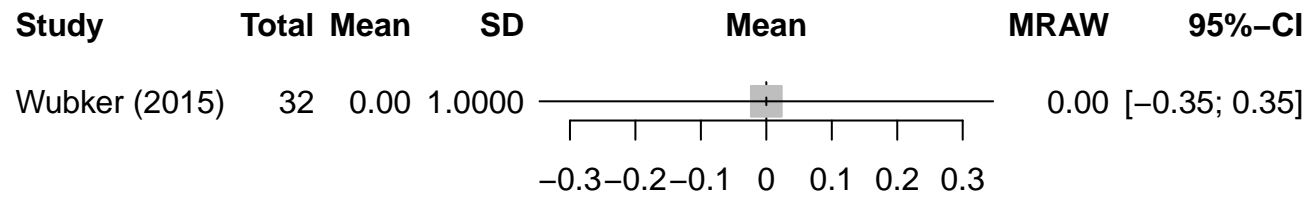



Eastern Europe & Baltics, Institution, Moderate, Caregiver work loss

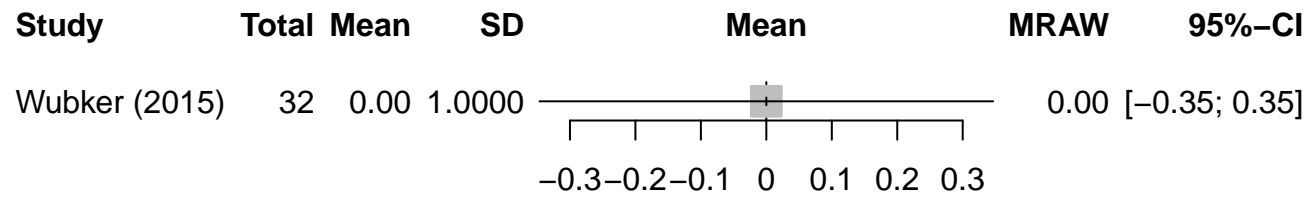

Eastern Europe & Baltics, Institution, Moderate, Caregiver time



Eastern Europe & Baltics, Institution, Severe, Inpatient care

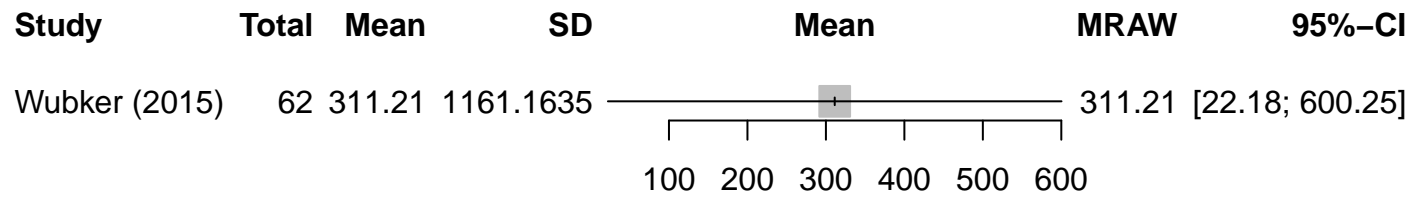

Eastern Europe & Baltics, Institution, Severe, Outpatient care

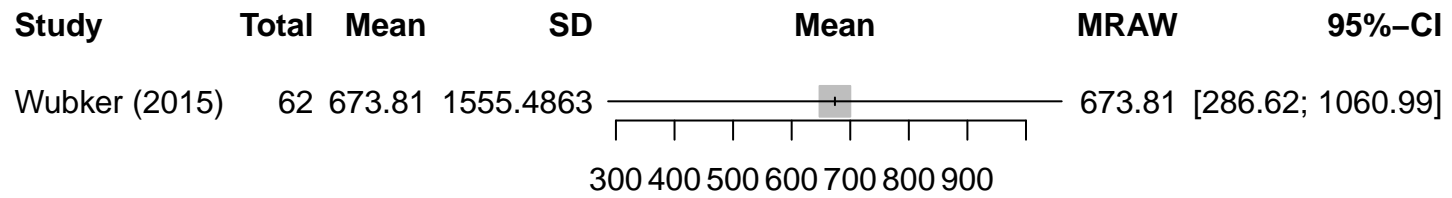

Eastern Europe & Baltics, Institution, Severe, Pharmaceuticals

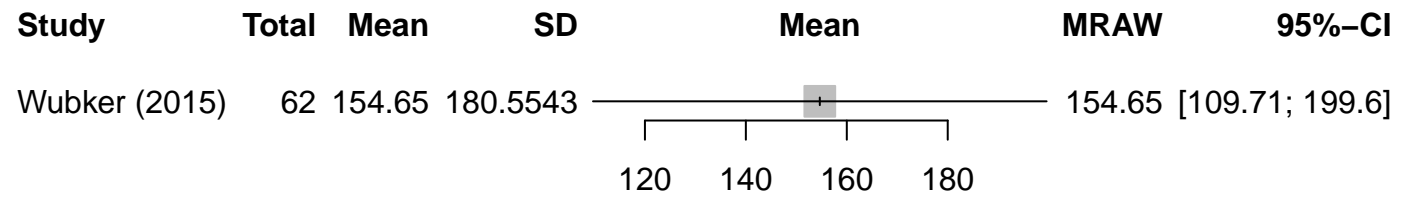

Eastern Europe & Baltics, Institution, Severe, Institutional care

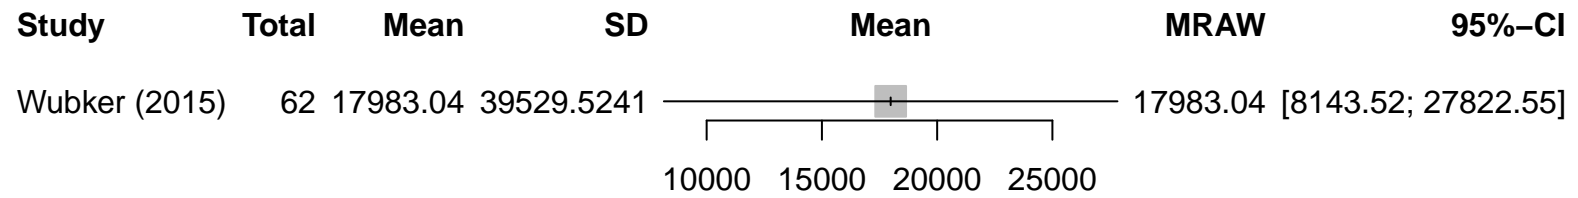

Eastern Europe & Baltics, Institution, Severe, Community care

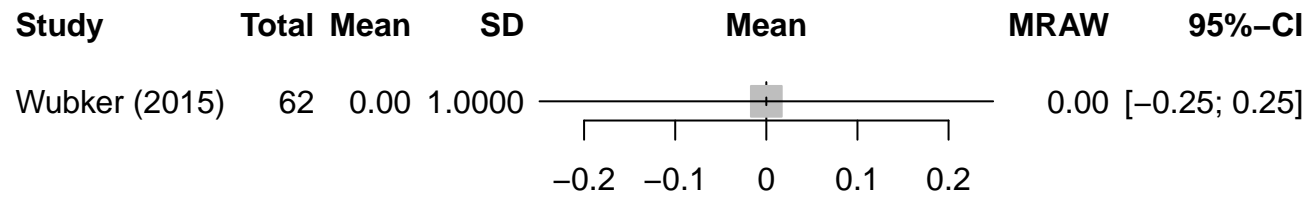

Eastern Europe & Baltics, Institution, Severe, Caregiver work loss





Eastern Europe & Baltics, Institution, Severe, Caregiver time

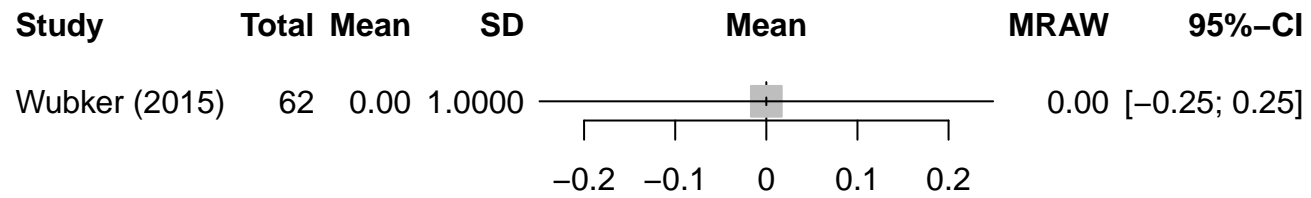

Eastern Europe & Baltics, Institution, All, Inpatient care

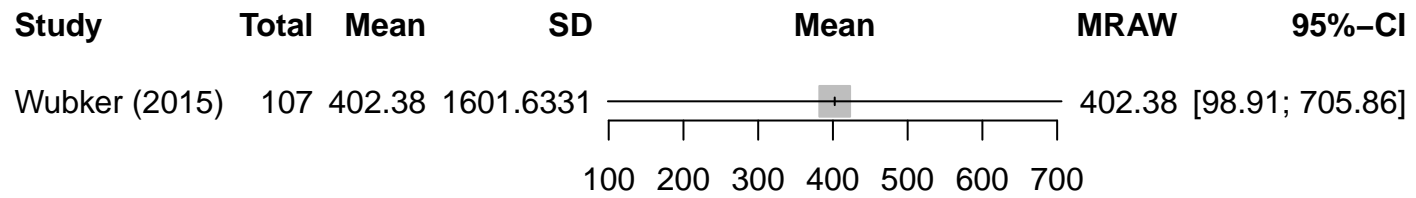

Eastern Europe & Baltics, Institution, All, Outpatient care

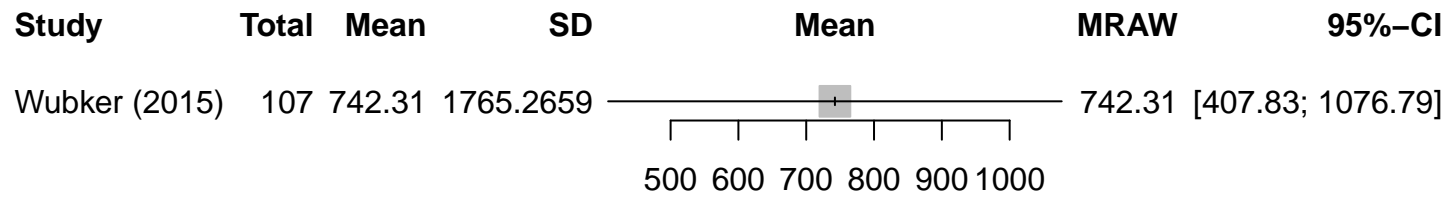

Eastern Europe & Baltics, Institution, All, Pharmaceuticals

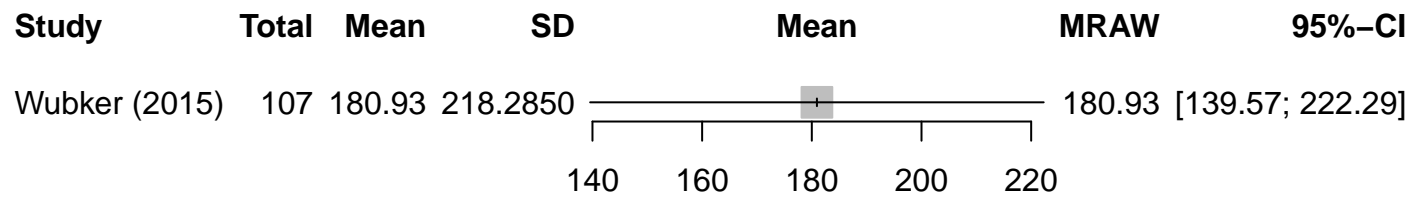

Eastern Europe & Baltics, Institution, All, Institutional care

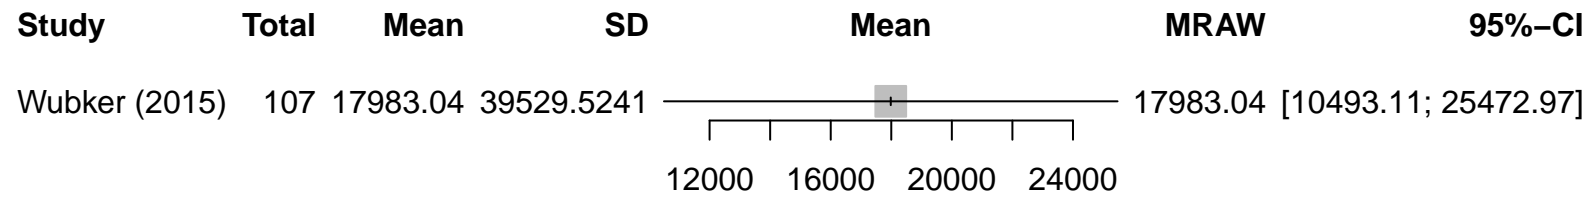

Eastern Europe & Baltics, Institution, All, Community care

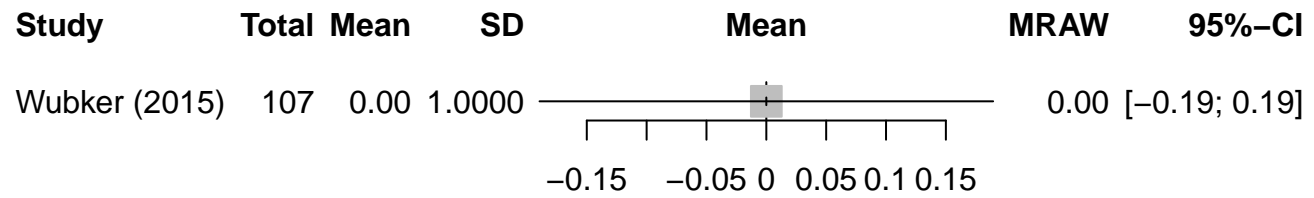

Eastern Europe & Baltics, Institution, All, Caregiver work loss



Eastern Europe & Baltics, Institution, All, Caregiver time





Eastern Europe & Baltics, All, Mild, Inpatient care

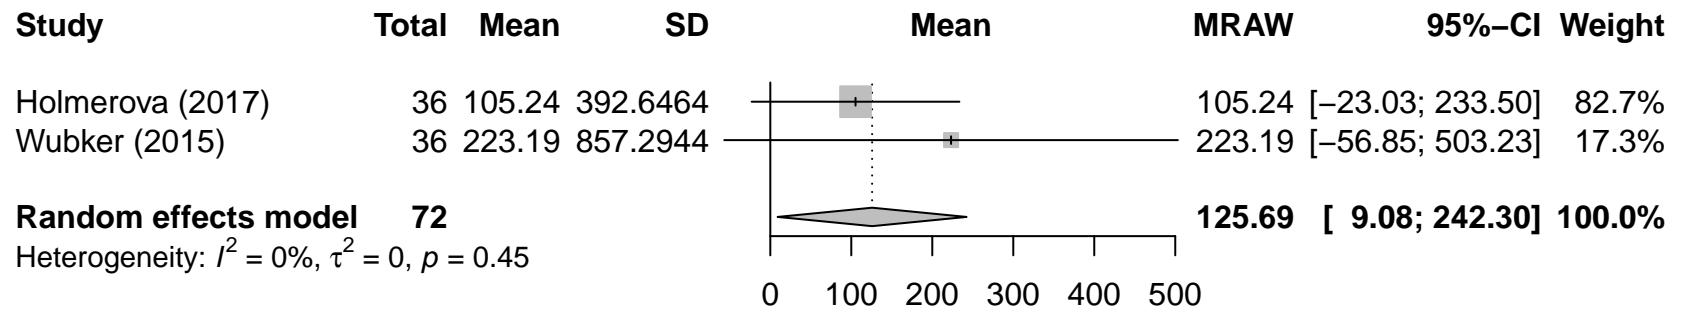

Eastern Europe & Baltics, All, Mild, Outpatient care

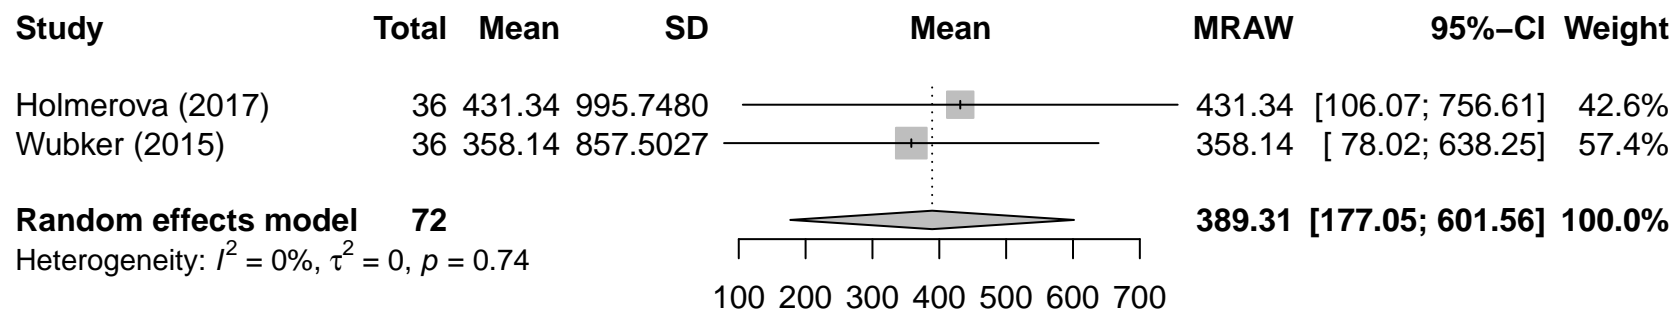

Eastern Europe & Baltics, All, Mild, Pharmaceuticals

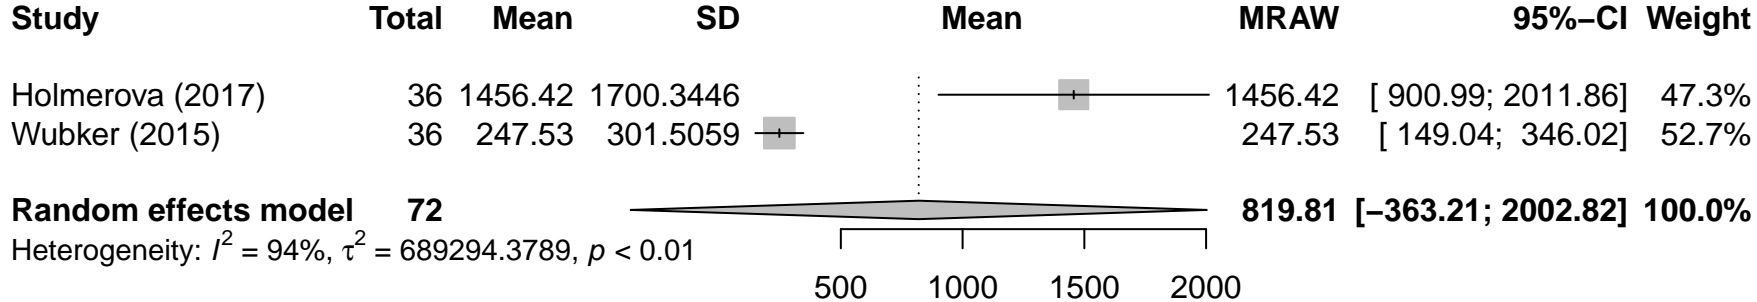

Eastern Europe & Baltics, All, Mild, Institutional care

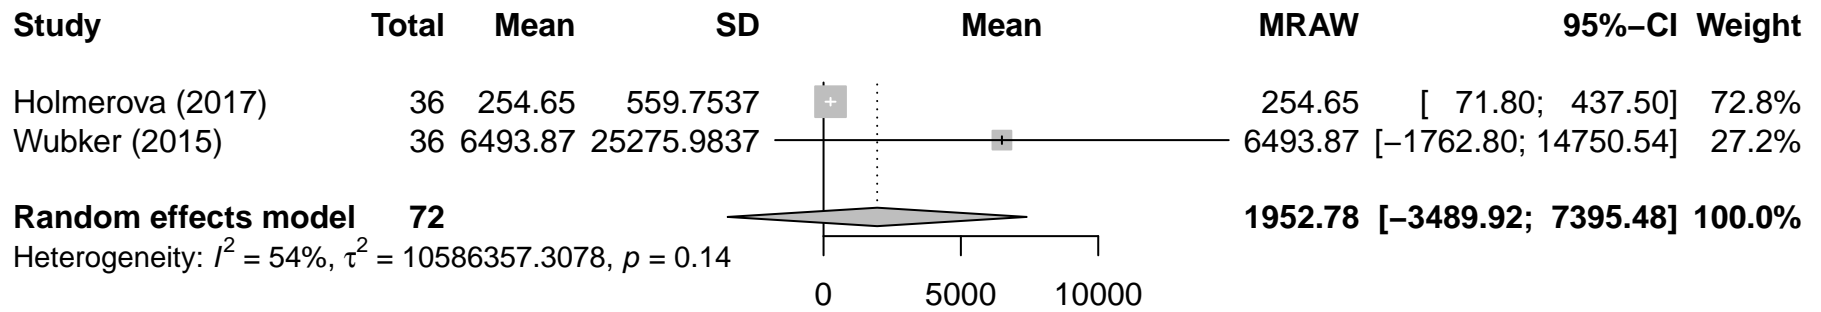

Eastern Europe & Baltics, All, Mild, Community care

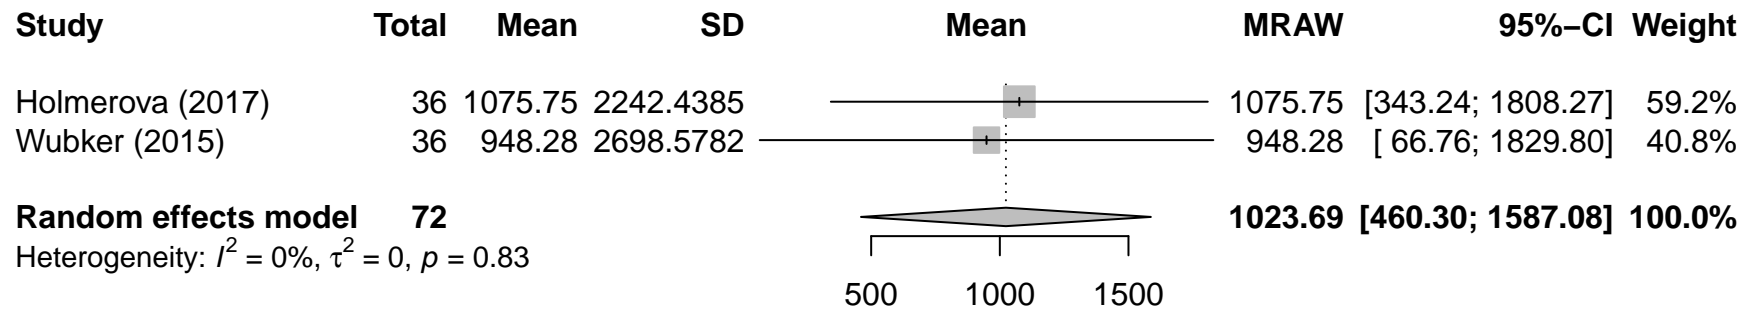

Eastern Europe & Baltics, All, Mild, Caregiver work loss

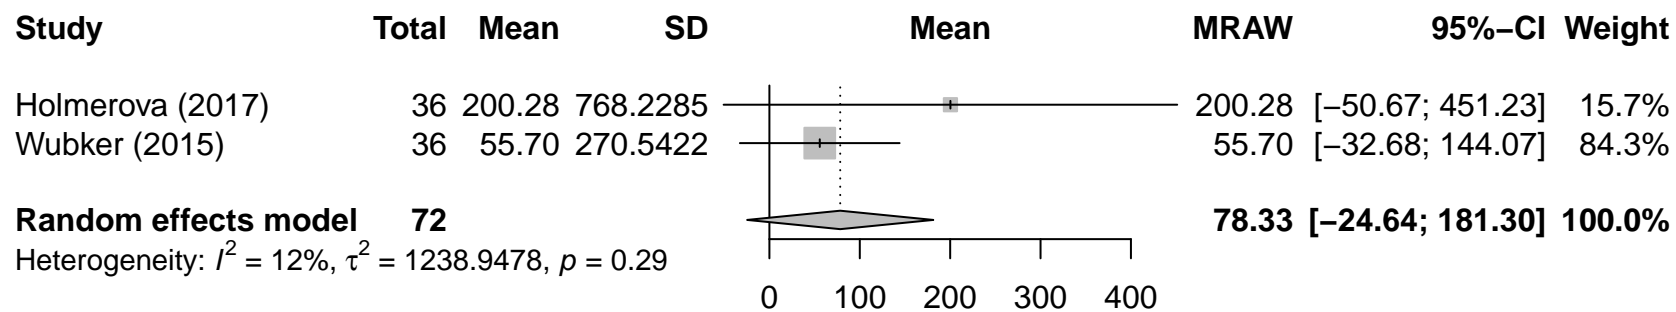

Eastern Europe & Baltics, All, Mild, Caregiver time

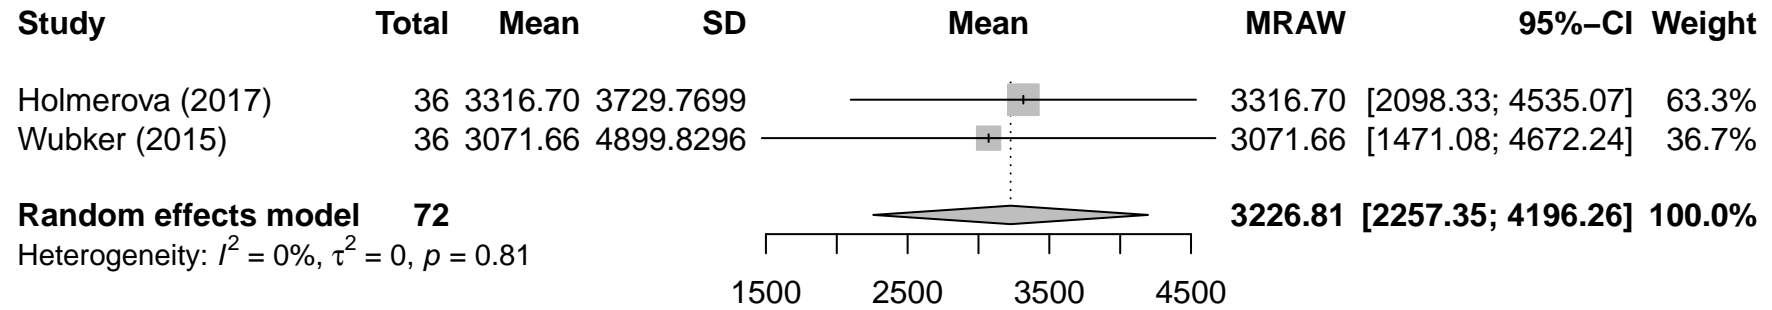

Eastern Europe & Baltics, All, Moderate, Inpatient care

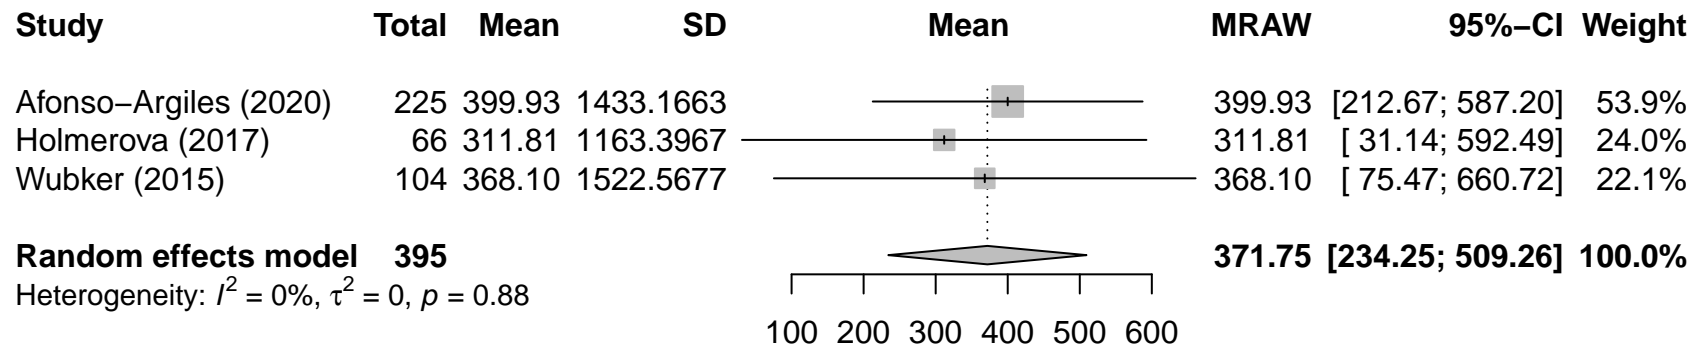



Eastern Europe & Baltics, All, Moderate, Outpatient care

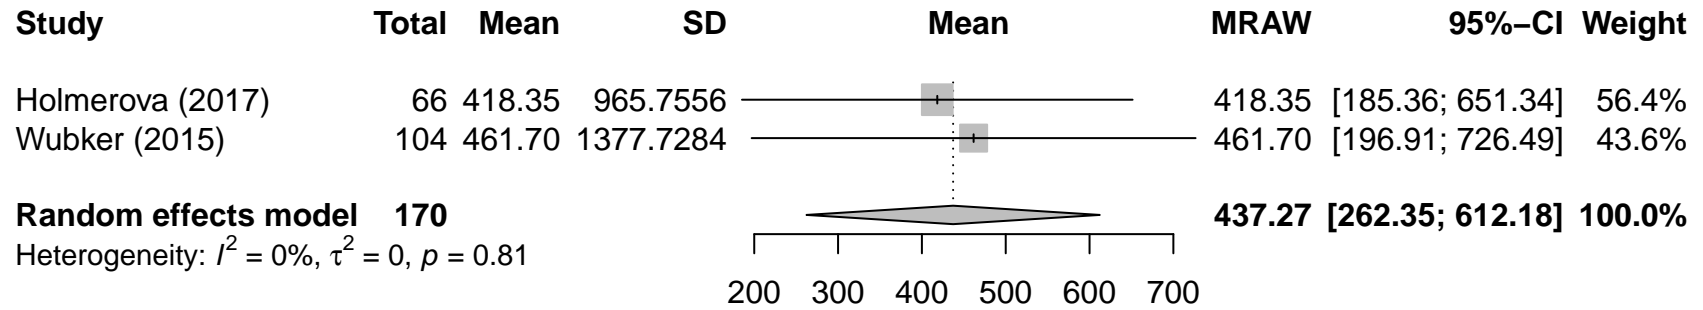

Eastern Europe & Baltics, All, Moderate, Pharmaceuticals

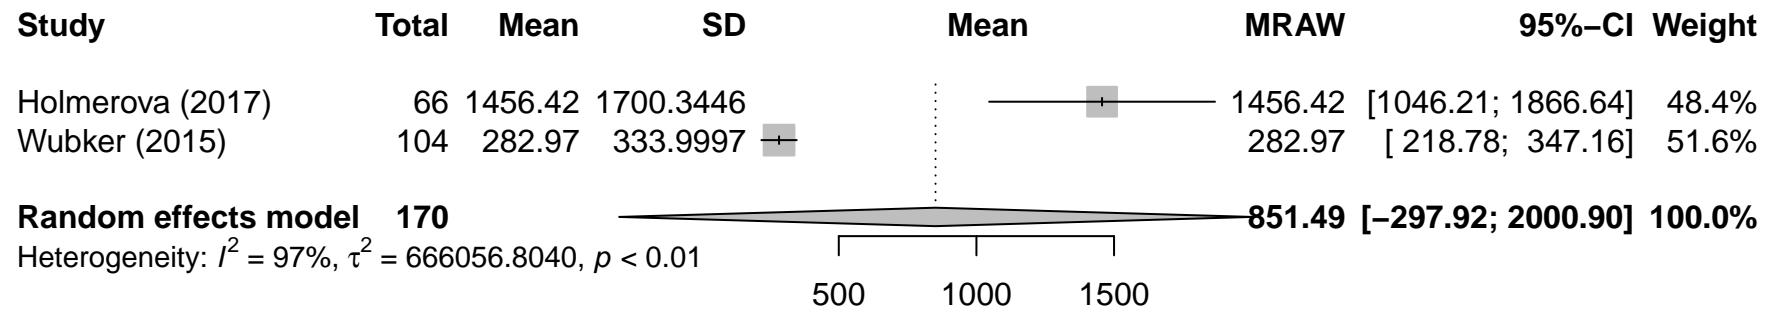

Eastern Europe & Baltics, All, Moderate, Institutional care

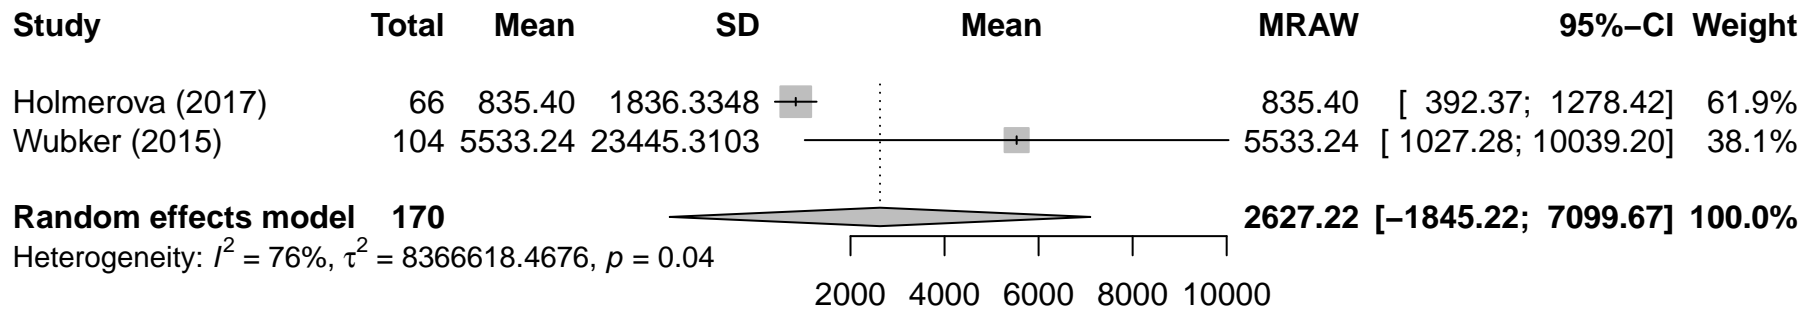

Eastern Europe & Baltics, All, Moderate, Community care

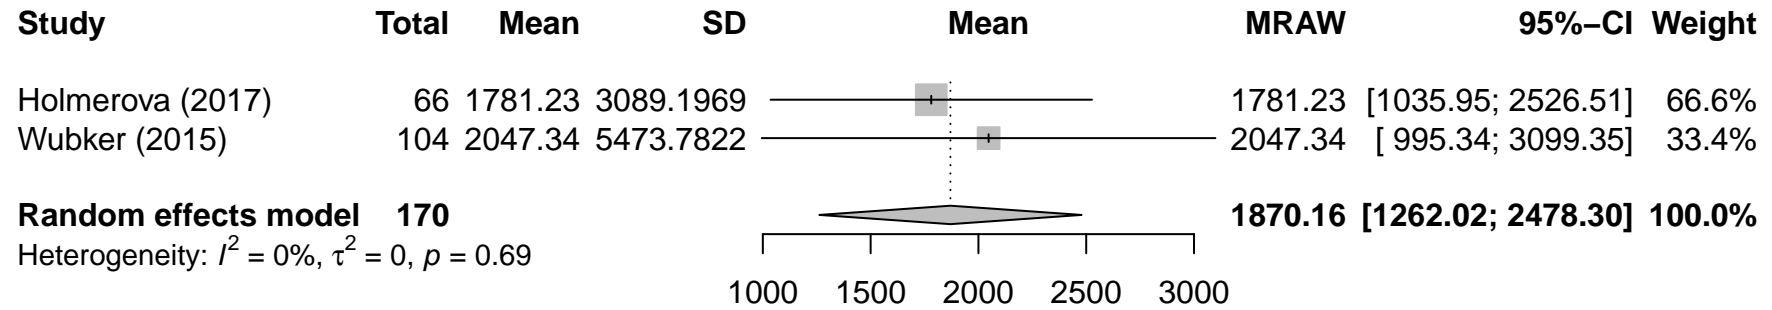

Eastern Europe & Baltics, All, Moderate, Caregiver work loss

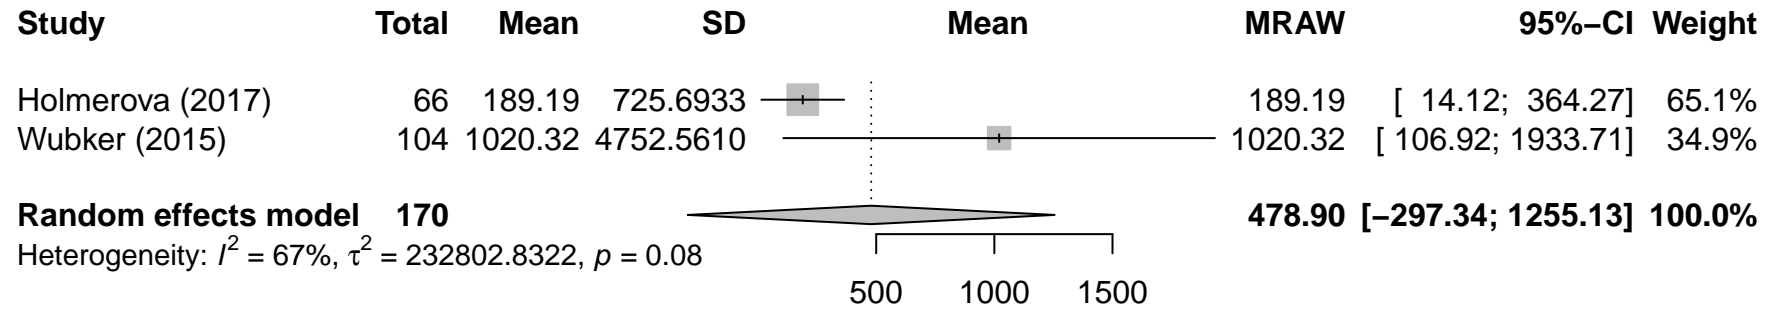

Eastern Europe & Baltics, All, Moderate, Caregiver time

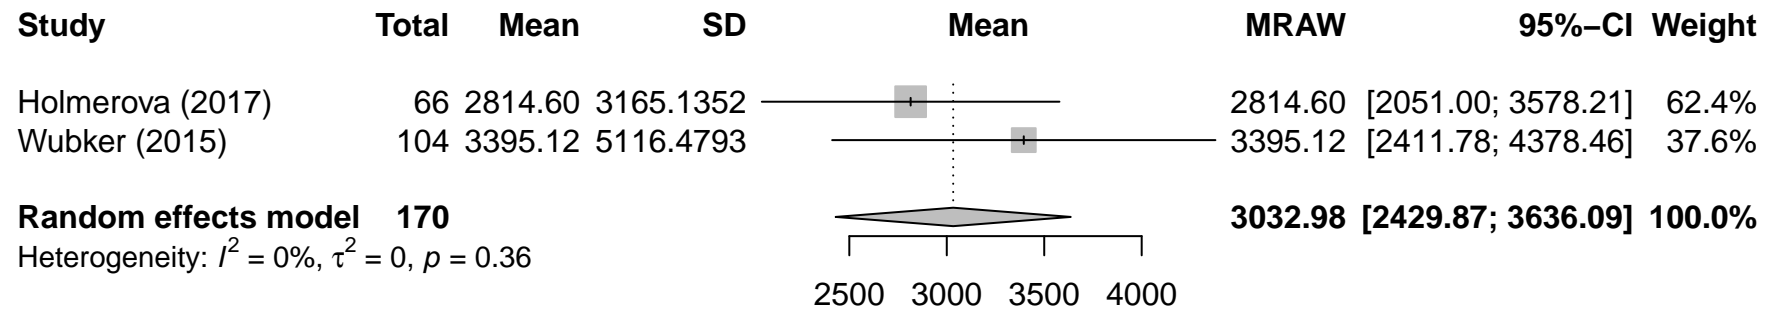

Eastern Europe & Baltics, All, Severe, Inpatient care

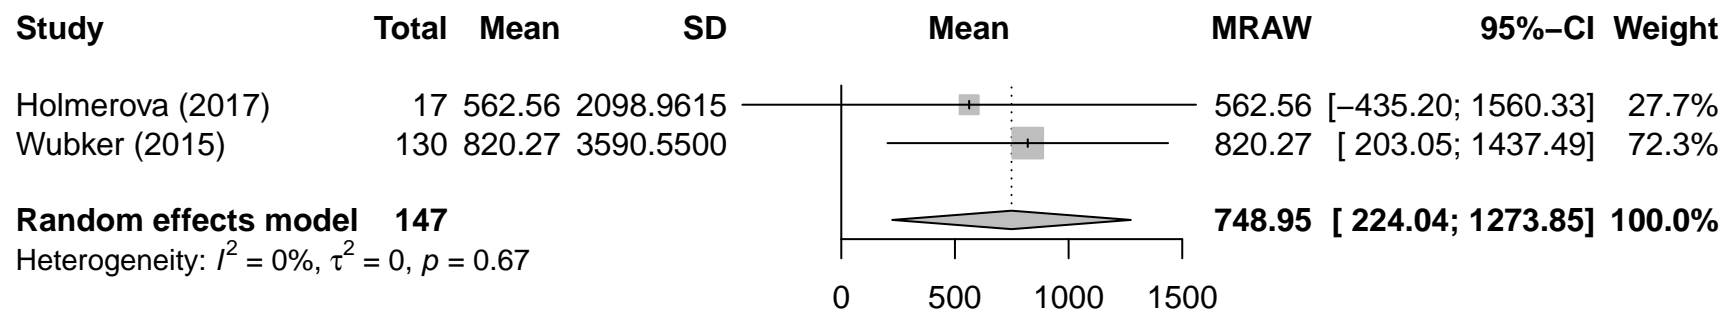

Eastern Europe & Baltics, All, Severe, Outpatient care

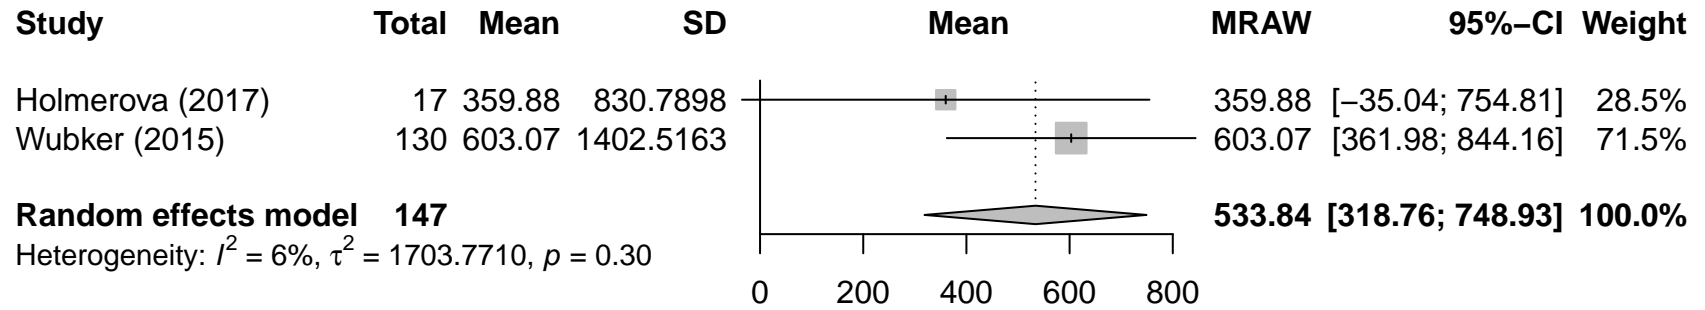



Eastern Europe & Baltics, All, Severe, Pharmaceuticals

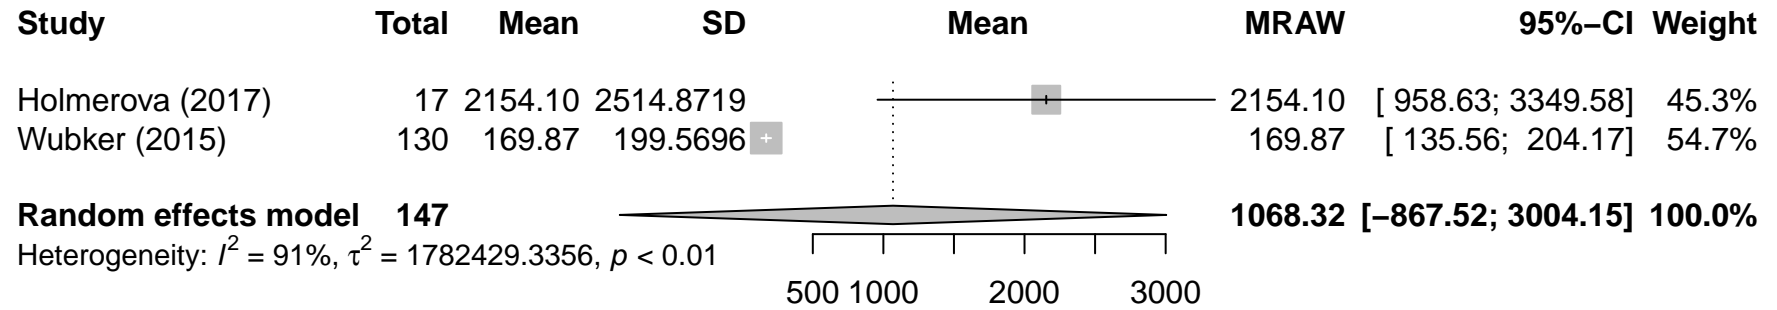

Eastern Europe & Baltics, All, Severe, Institutional care

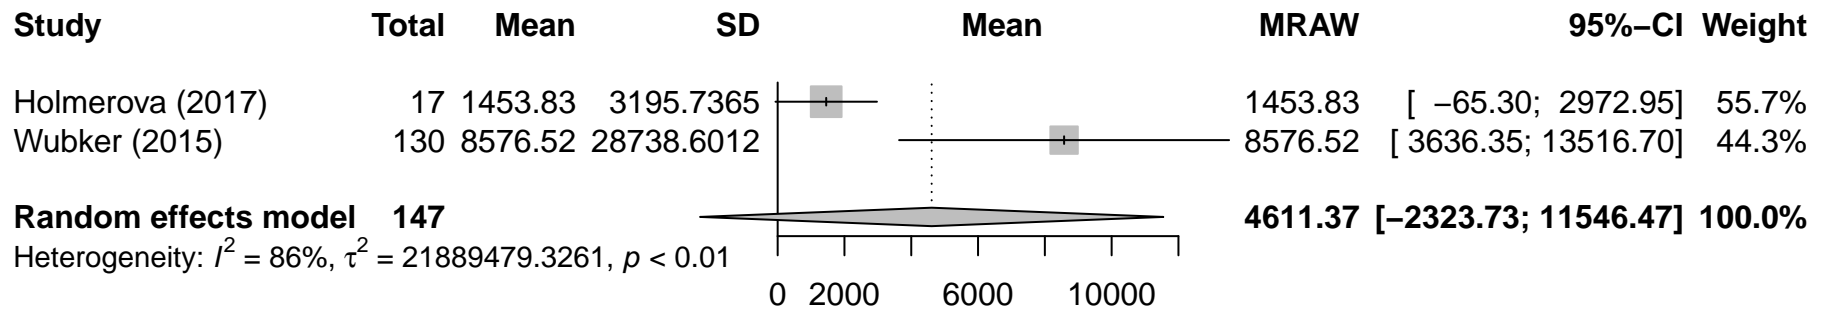

Eastern Europe & Baltics, All, Severe, Community care

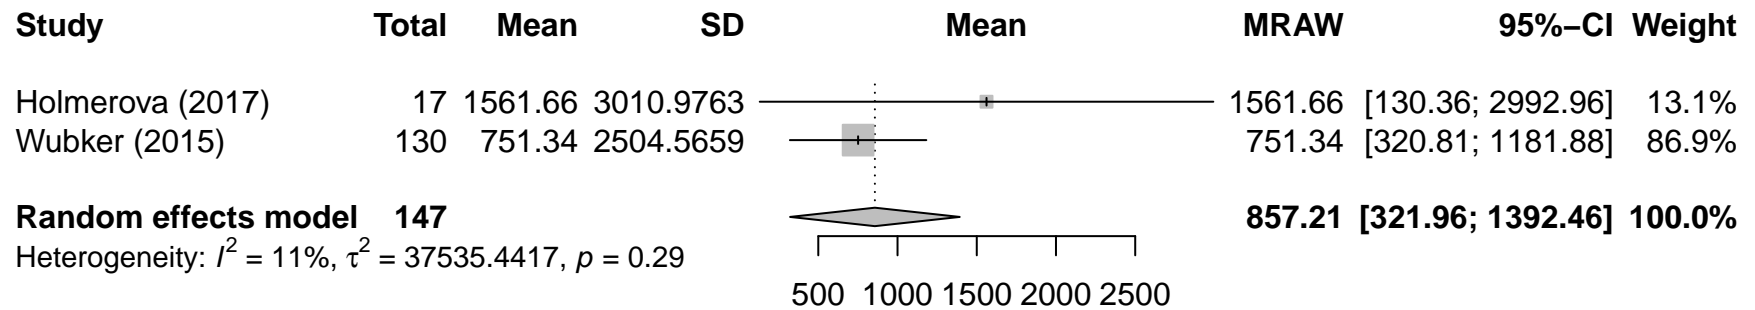

Eastern Europe & Baltics, All, Severe, Caregiver work loss

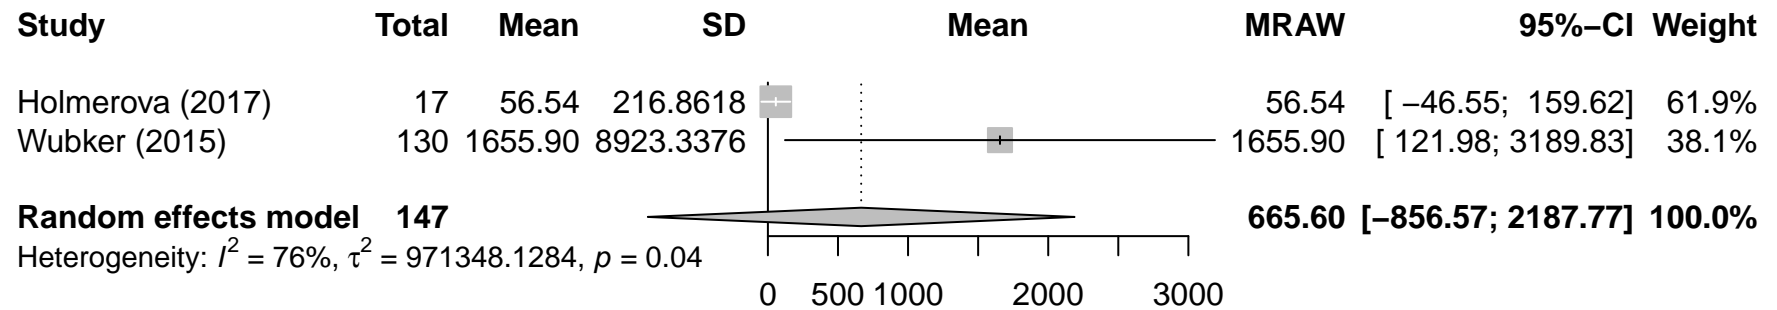

Eastern Europe & Baltics, All, Severe, Caregiver time

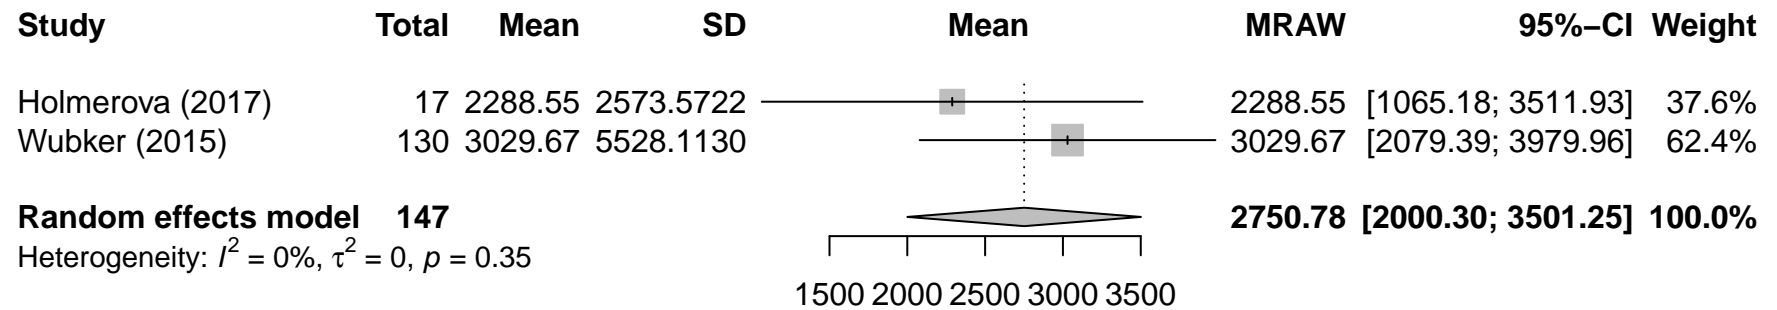

Eastern Europe & Baltics, All, All, Inpatient care

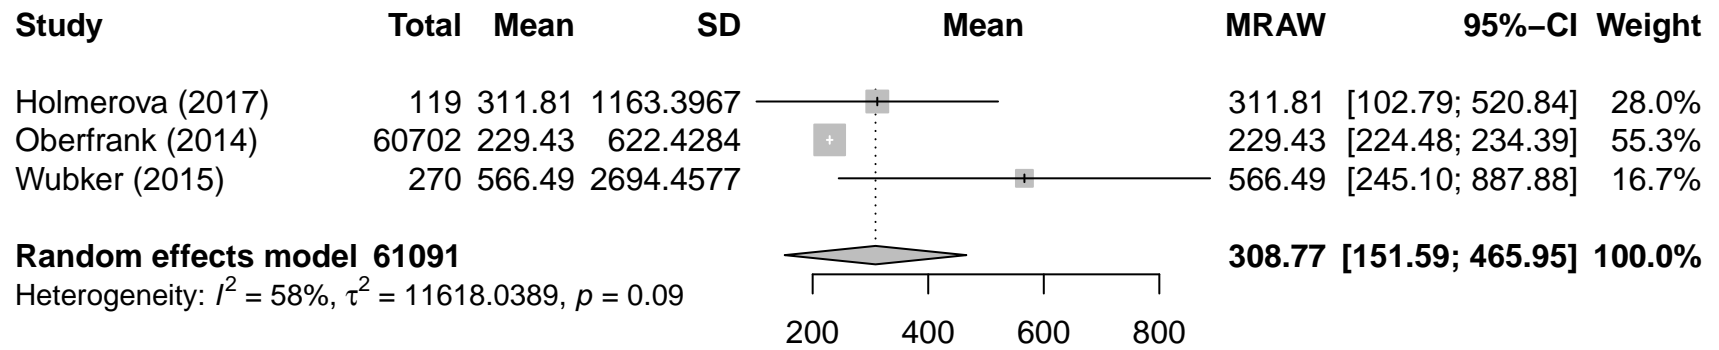

Eastern Europe & Baltics, All, All, Outpatient care

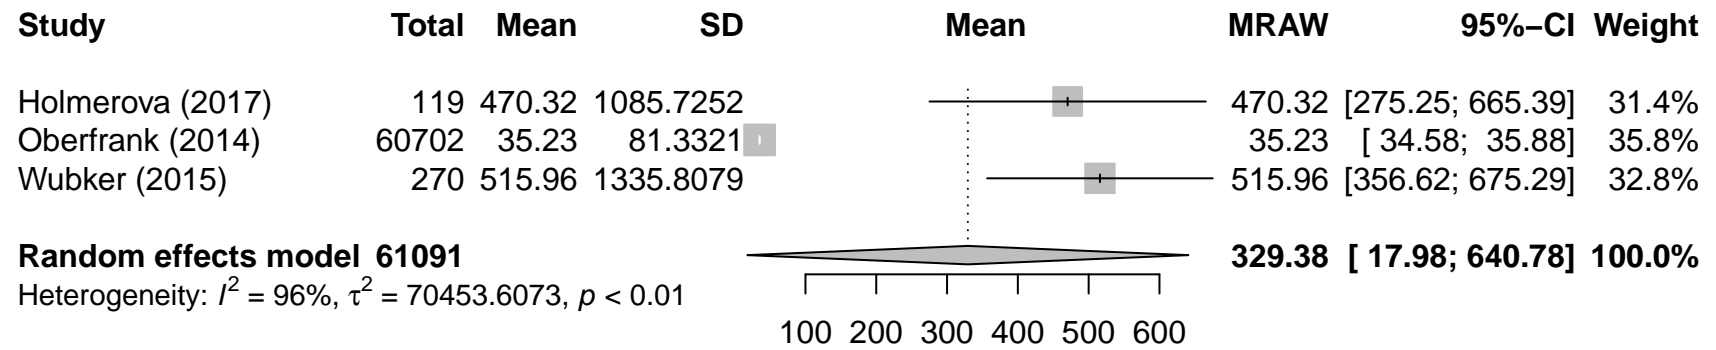

Eastern Europe & Baltics, All, All, Pharmaceuticals

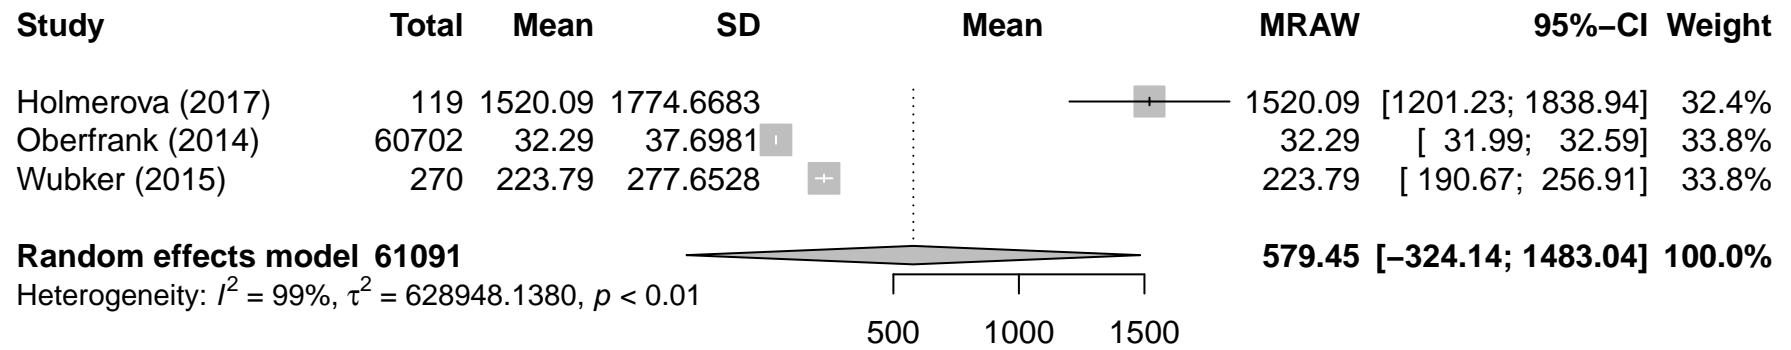



Eastern Europe & Baltics, All, All, Institutional care

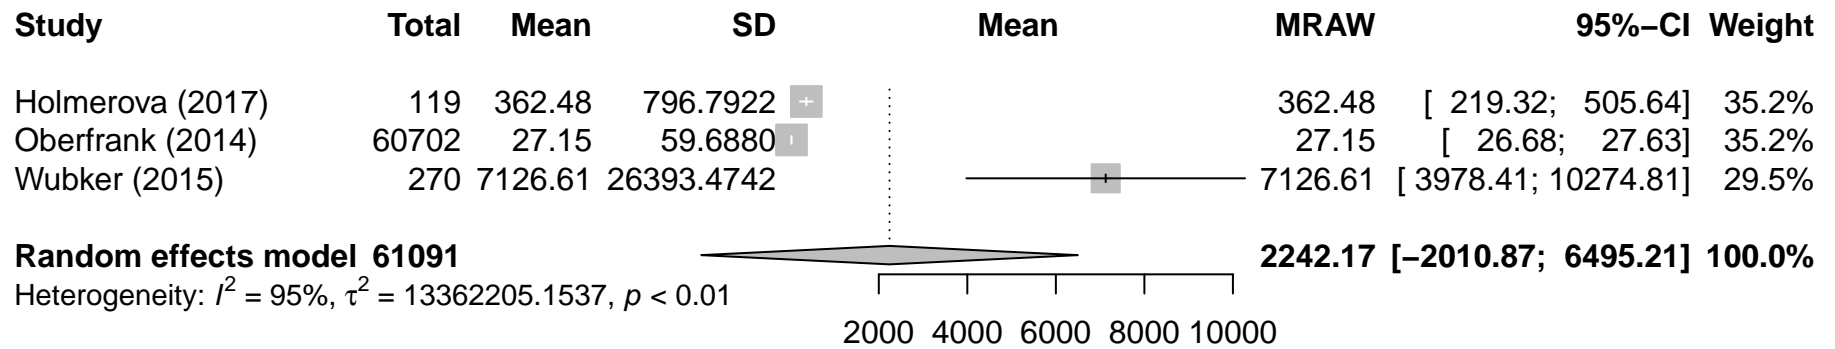

Eastern Europe & Baltics, All, All, Community care

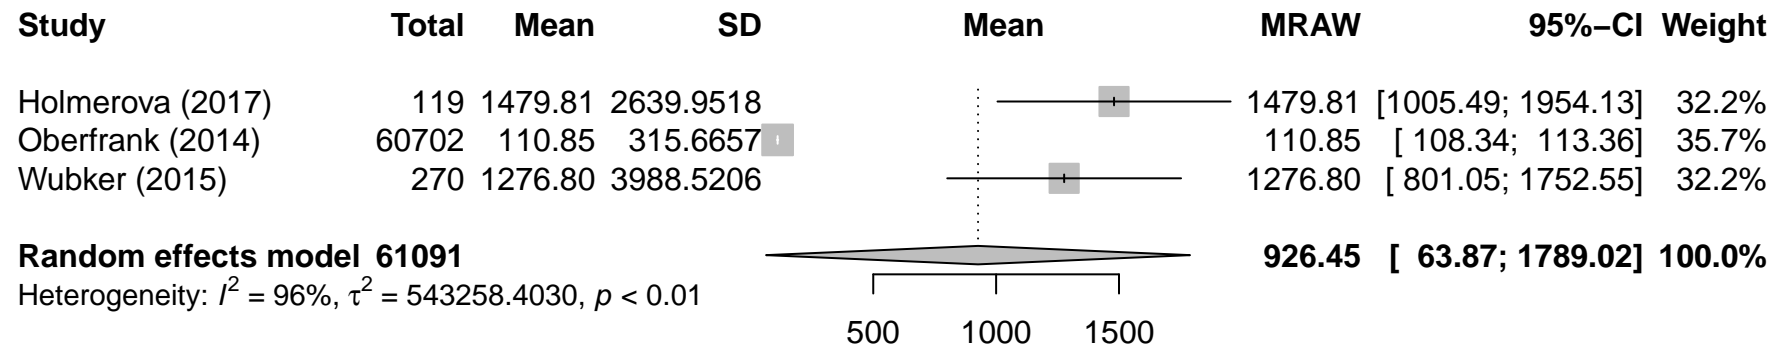

Eastern Europe & Baltics, All, All, Caregiver work loss

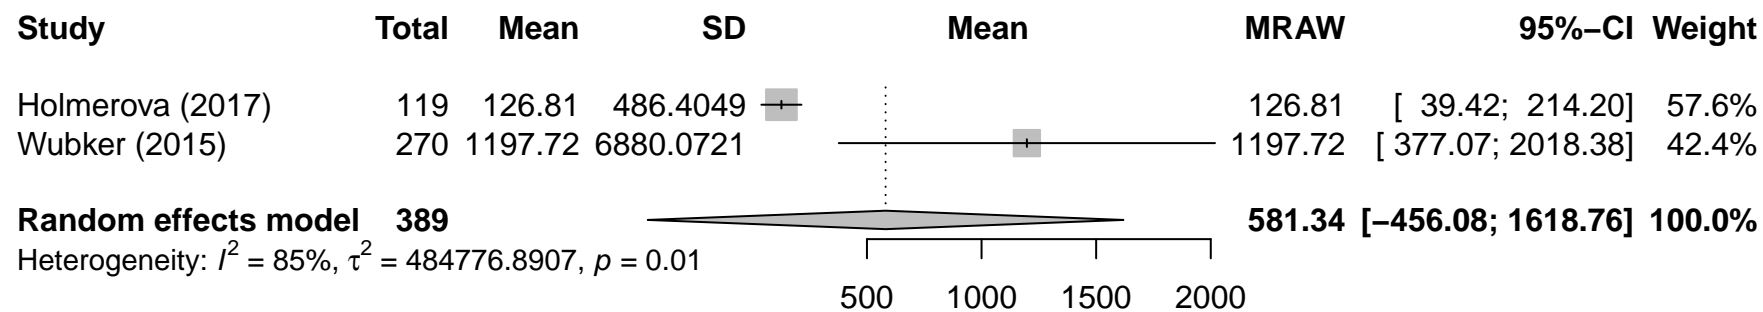

Eastern Europe & Baltics, All, All, Caregiver time

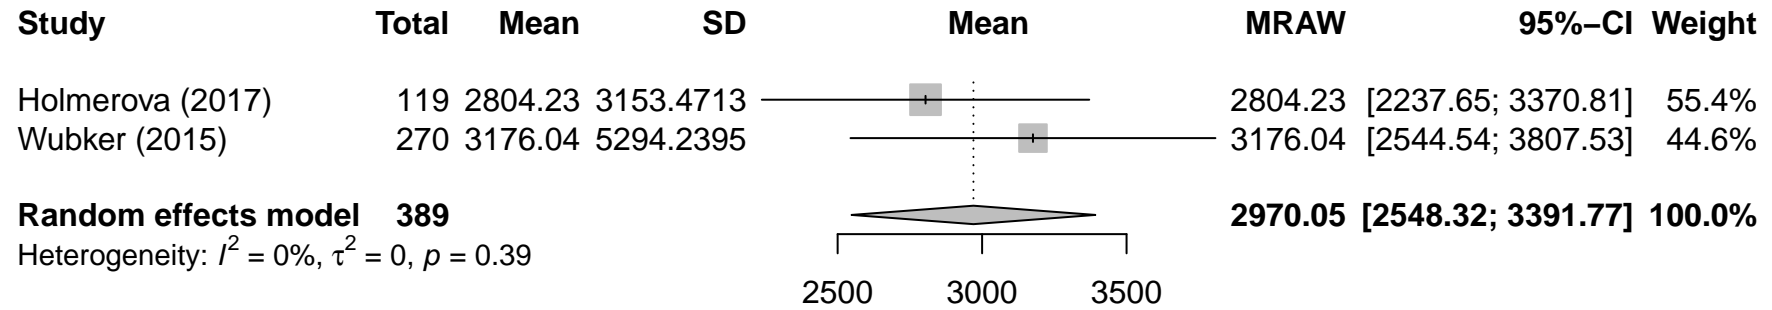

Nordics, Community, Mild, Inpatient care

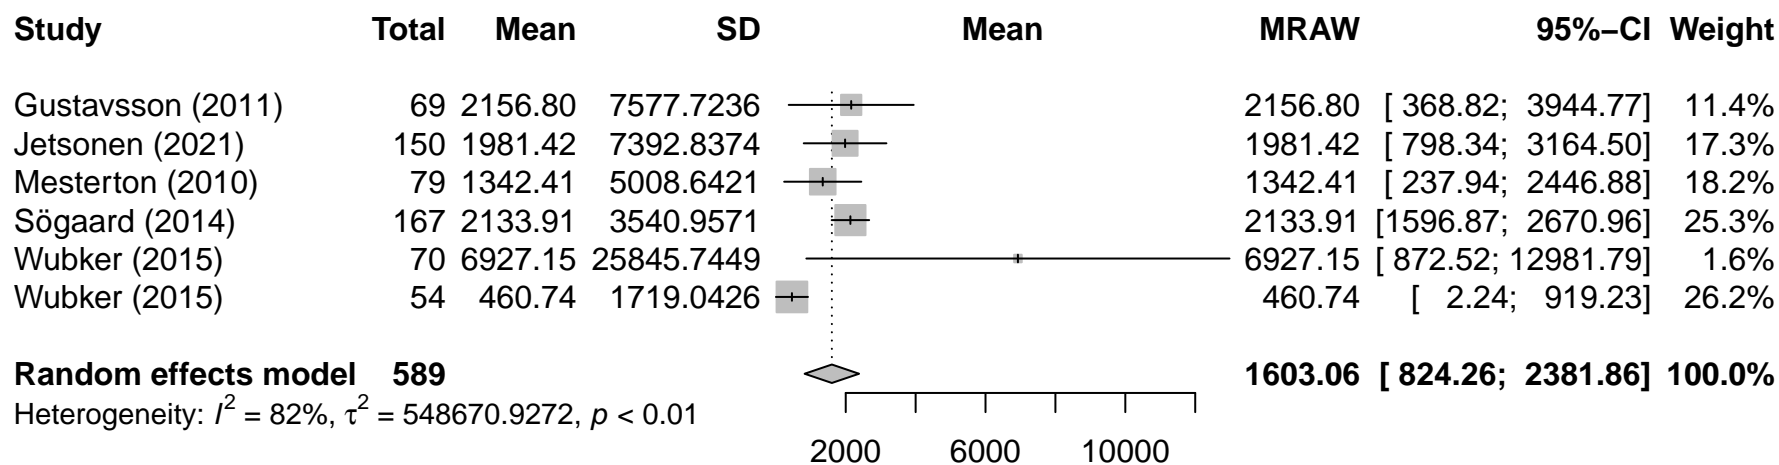

Nordics, Community, Mild, Outpatient care

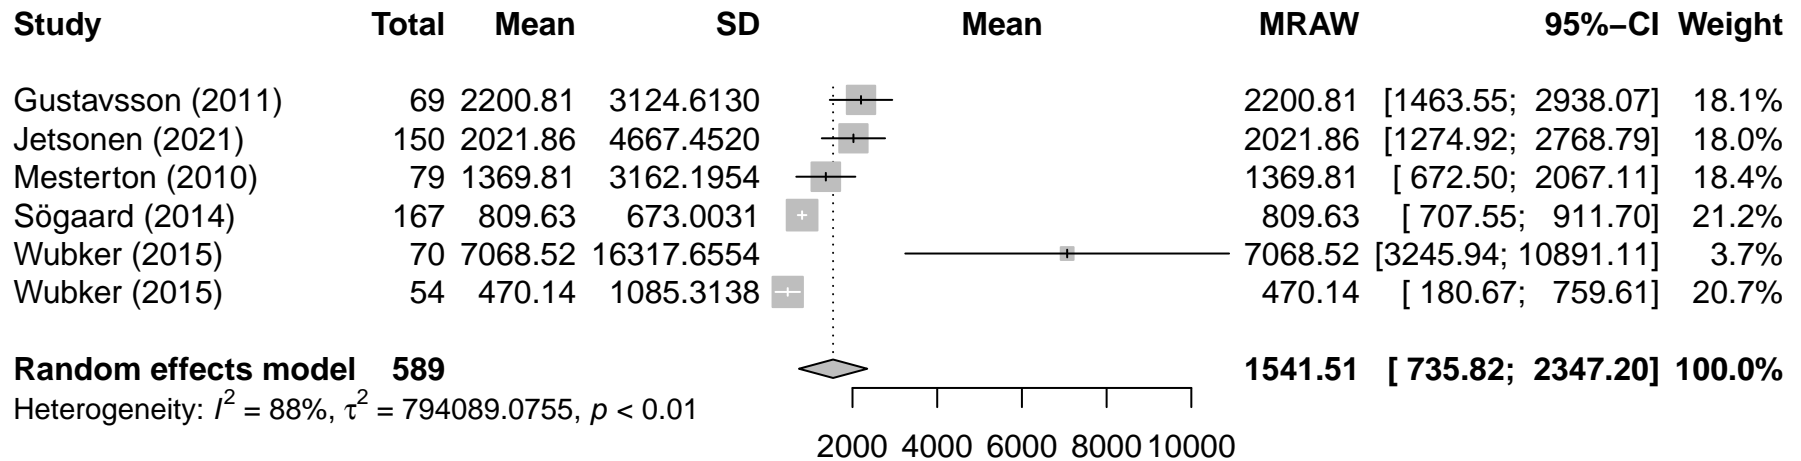

Nordics, Community, Mild, Pharmaceuticals

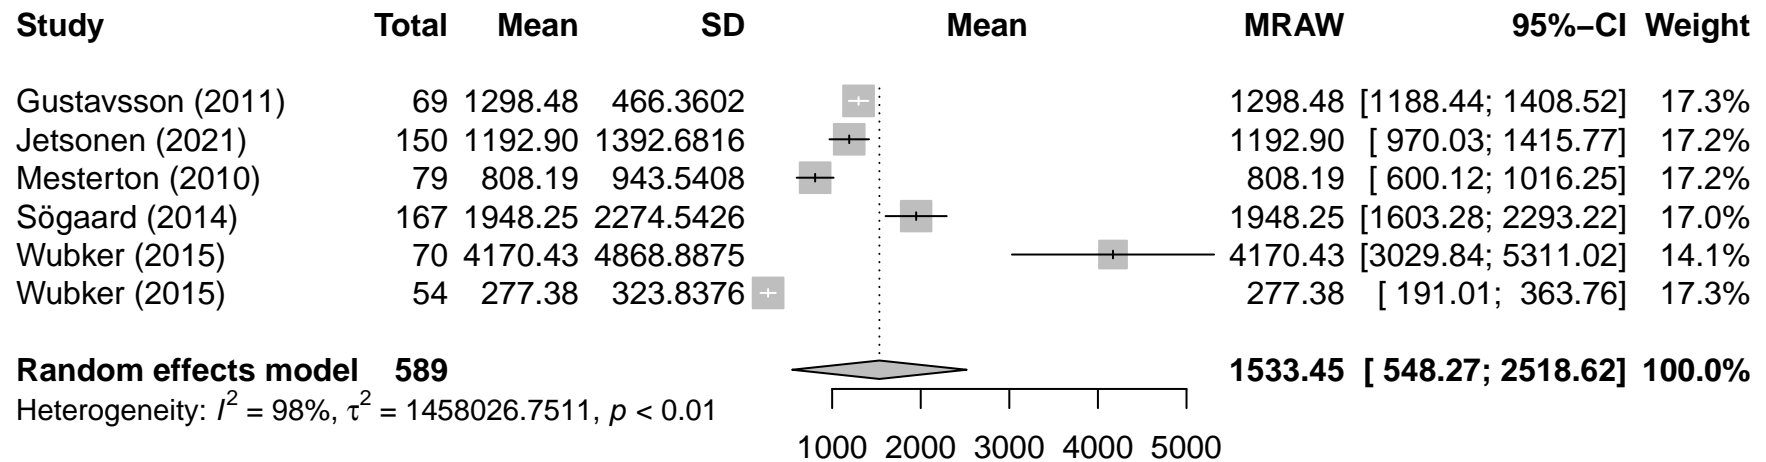

Nordics, Community, Mild, Institutional care

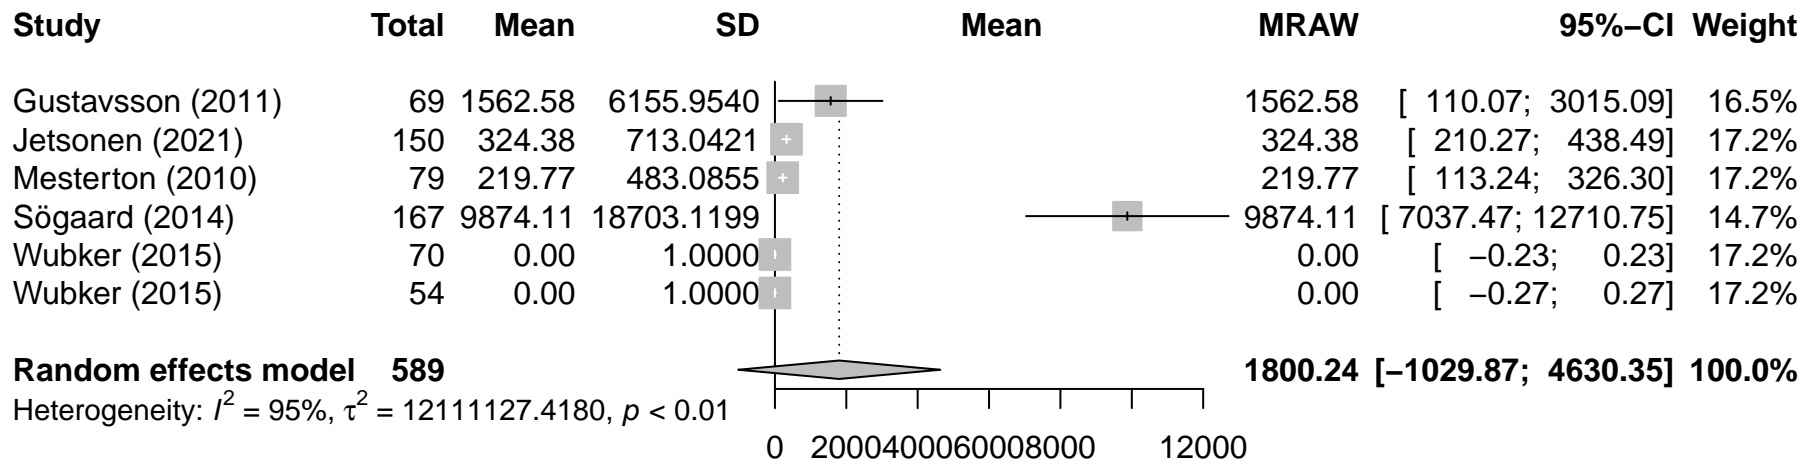



Nordics, Community, Mild, Community care

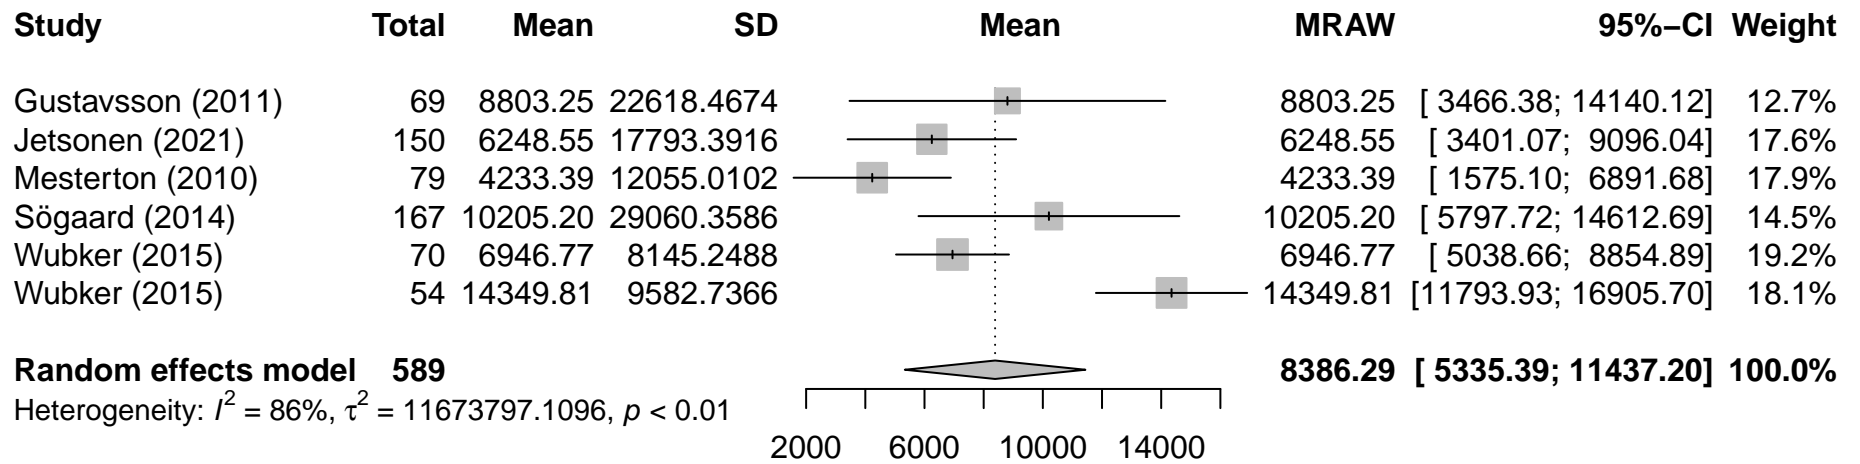

Nordics, Community, Mild, Caregiver work loss

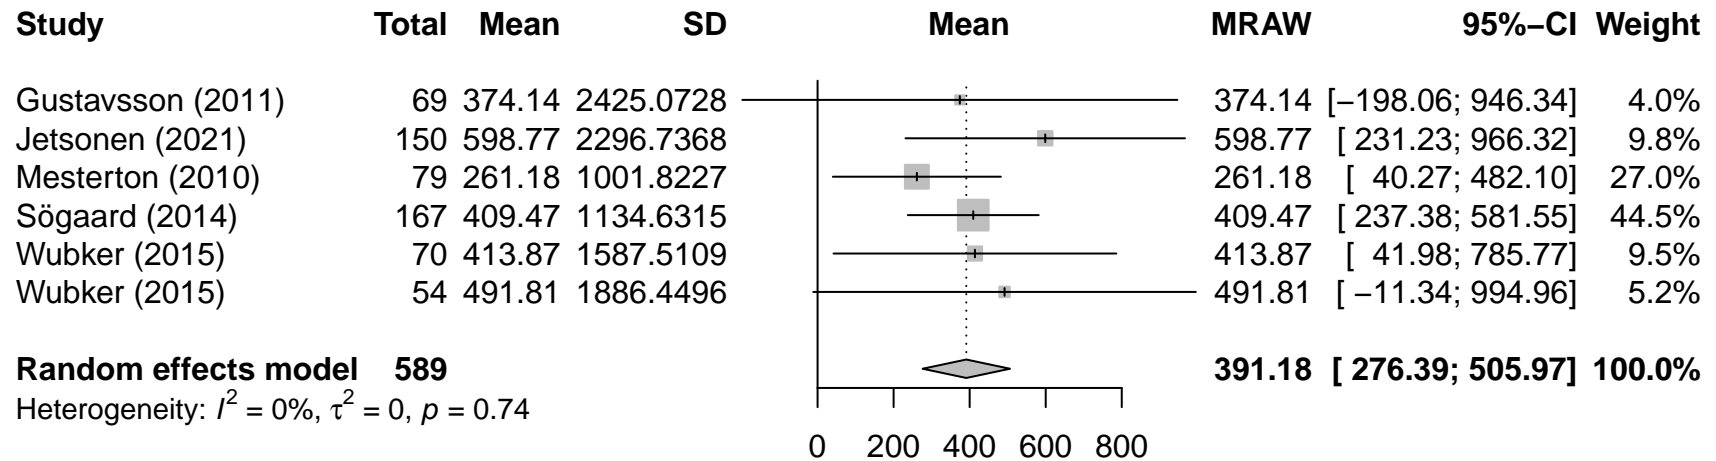

Nordics, Community, Mild, Caregiver time

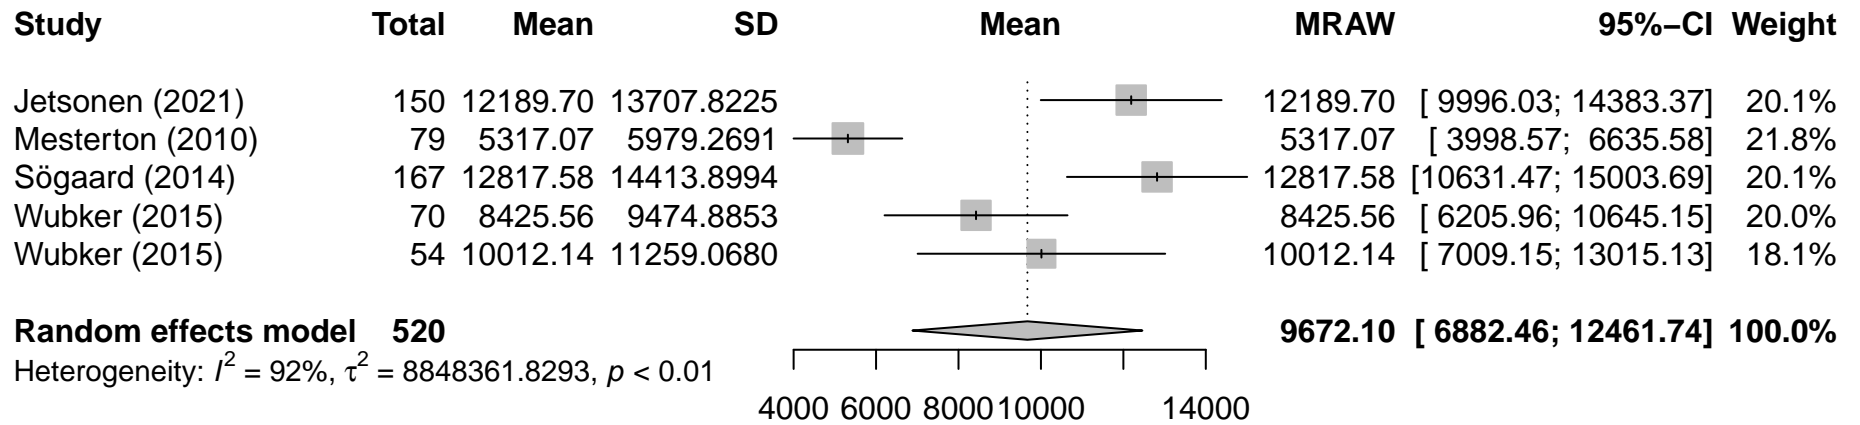

Nordics, Community, Moderate, Inpatient care

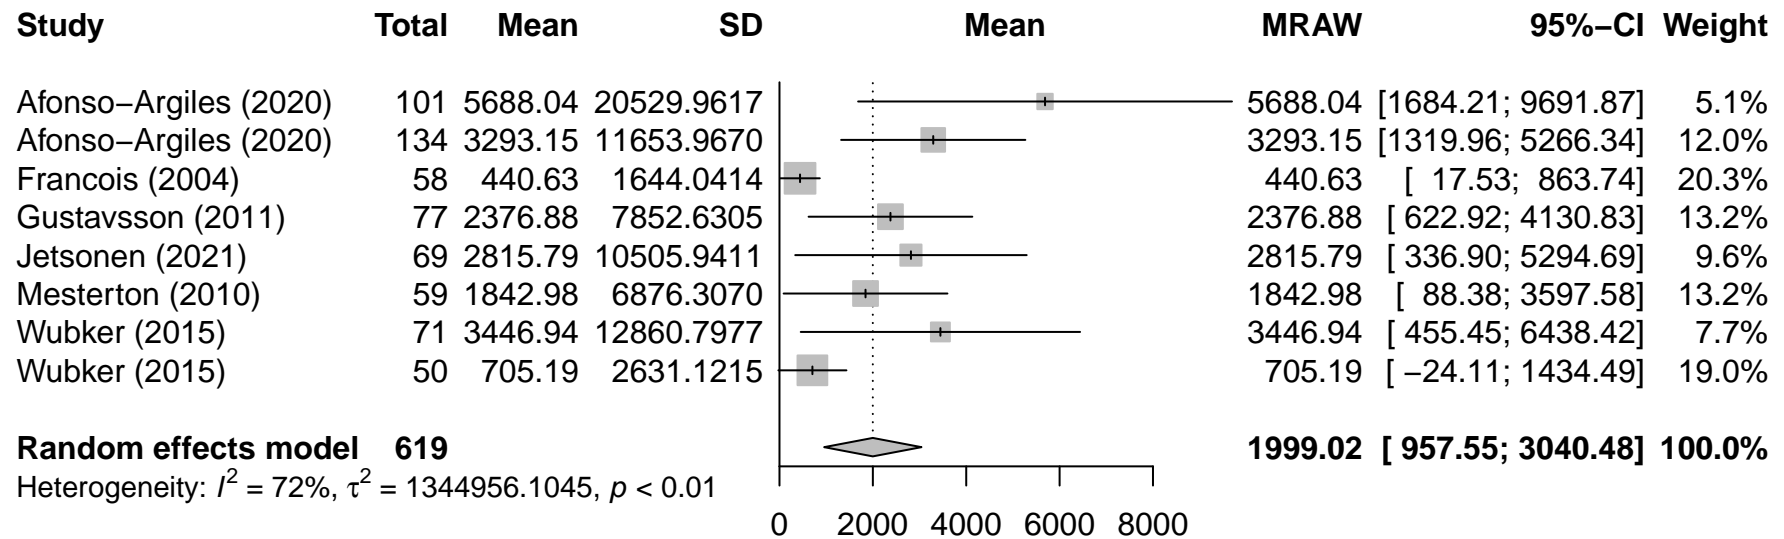

Nordics, Community, Moderate, Outpatient care

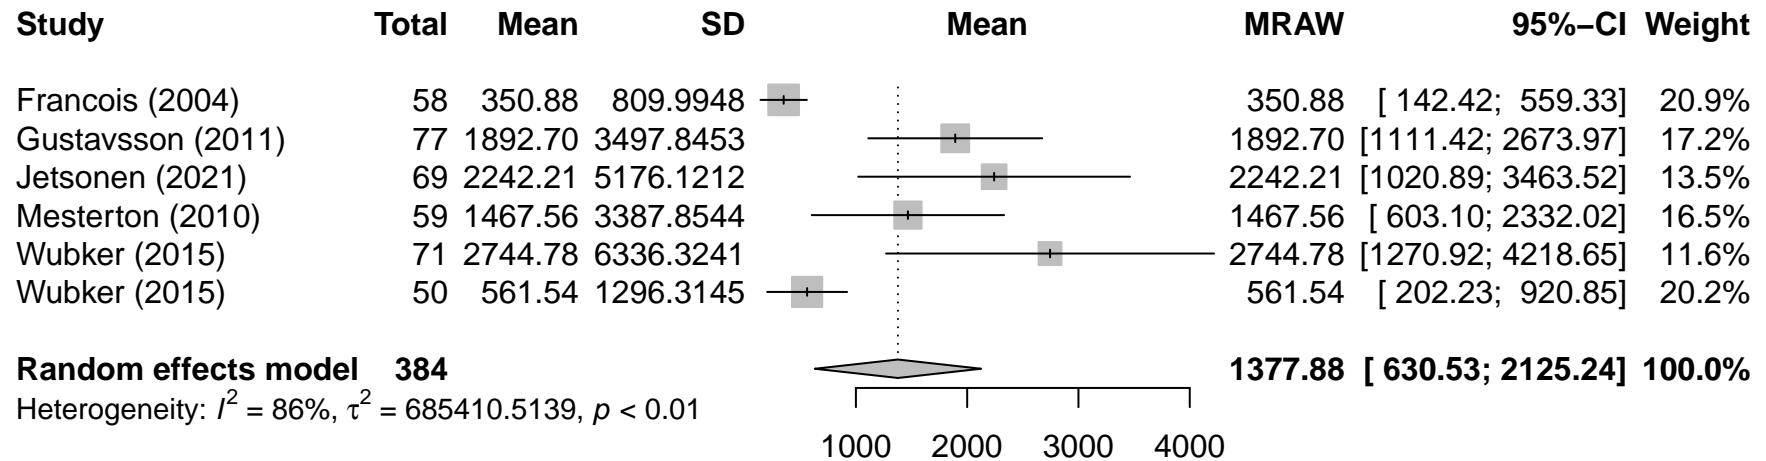

Nordics, Community, Moderate, Pharmaceuticals

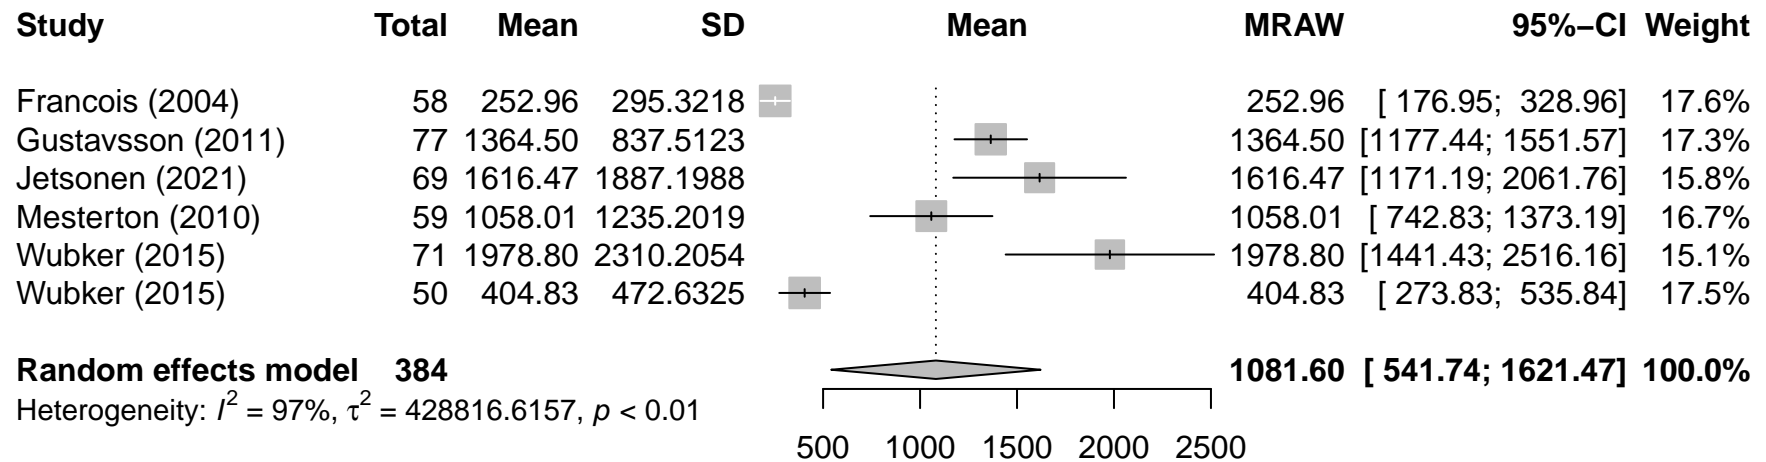

Nordics, Community, Moderate, Institutional care

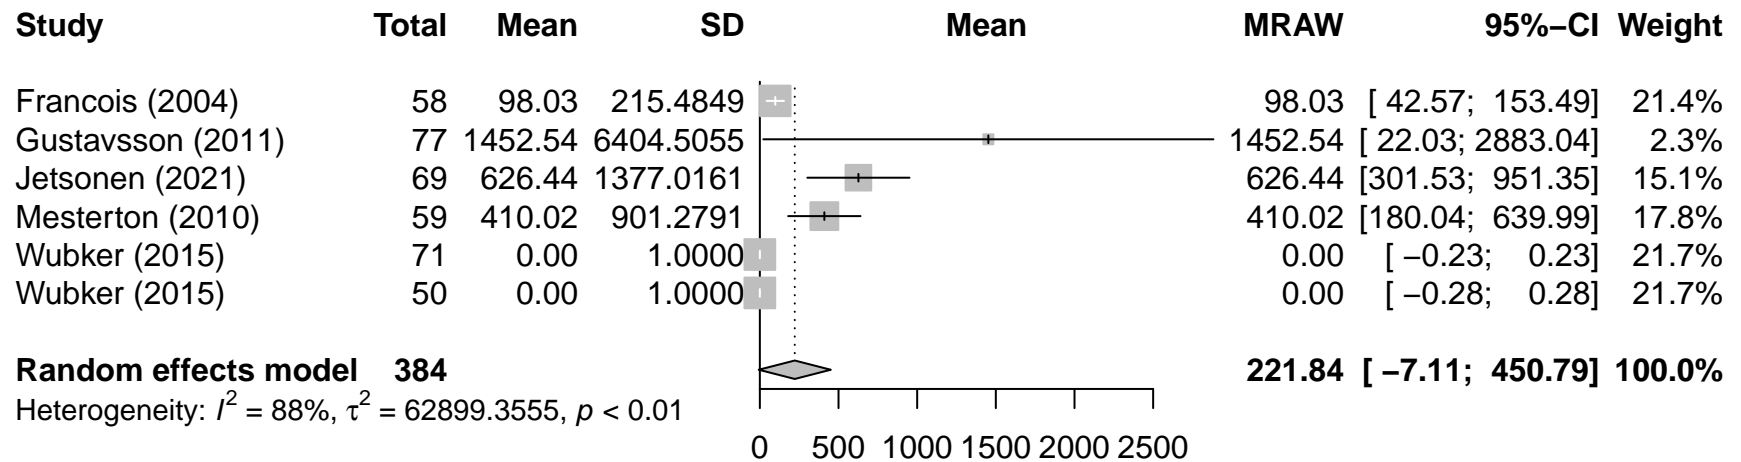

Nordics, Community, Moderate, Community care

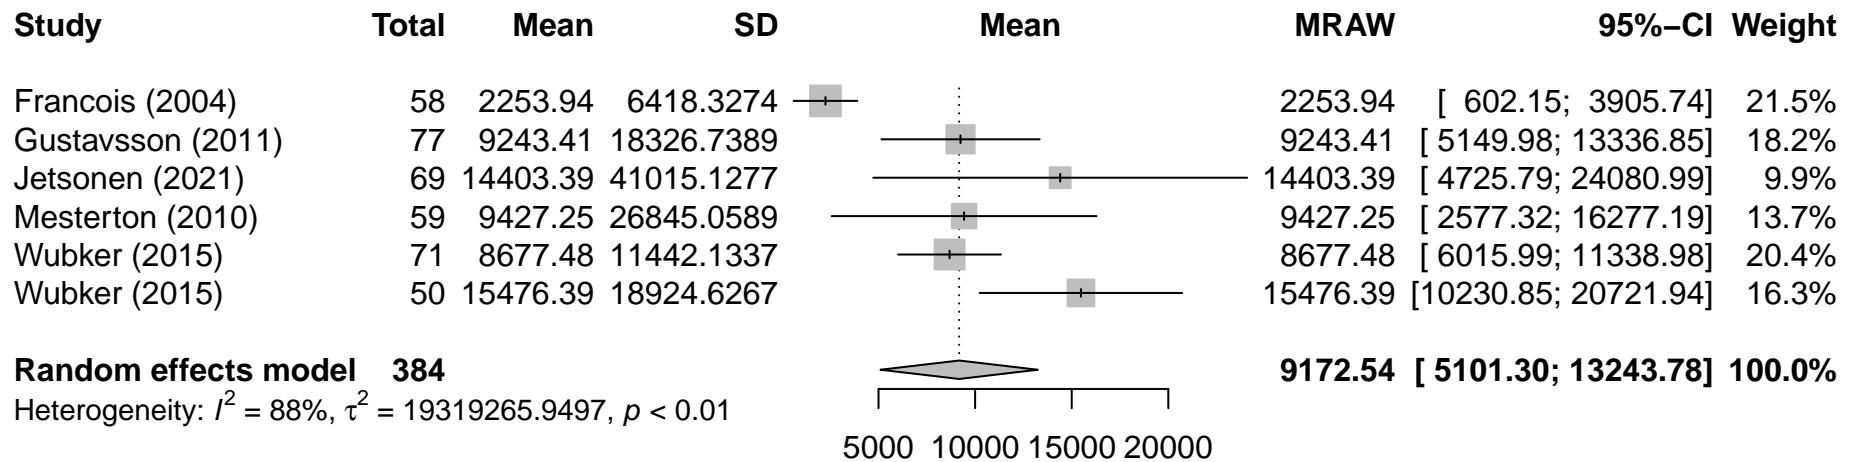



Nordics, Community, Moderate, Caregiver work loss

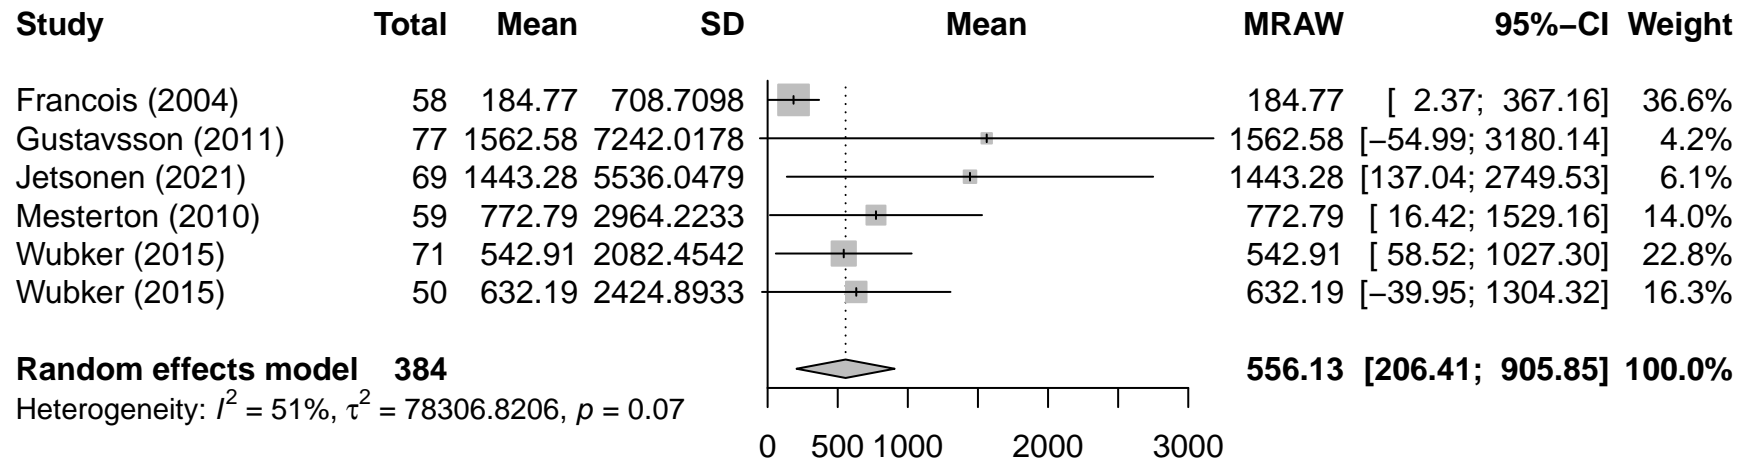

Nordics, Community, Moderate, Caregiver time

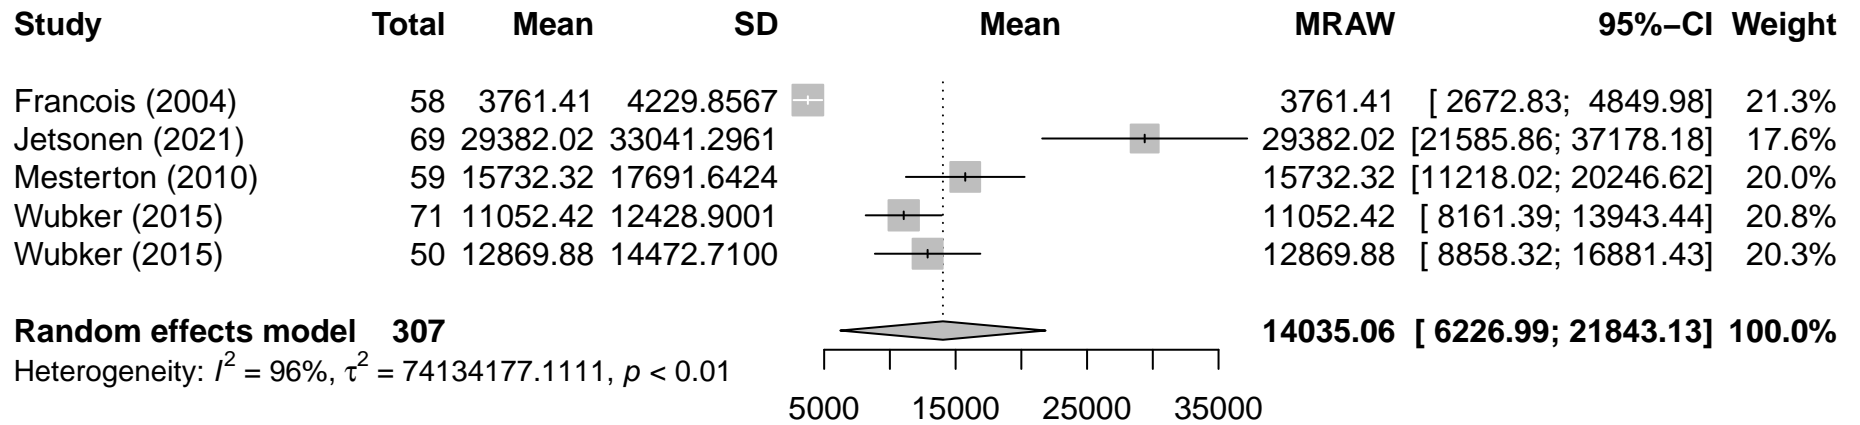

Nordics, Community, Severe, Inpatient care

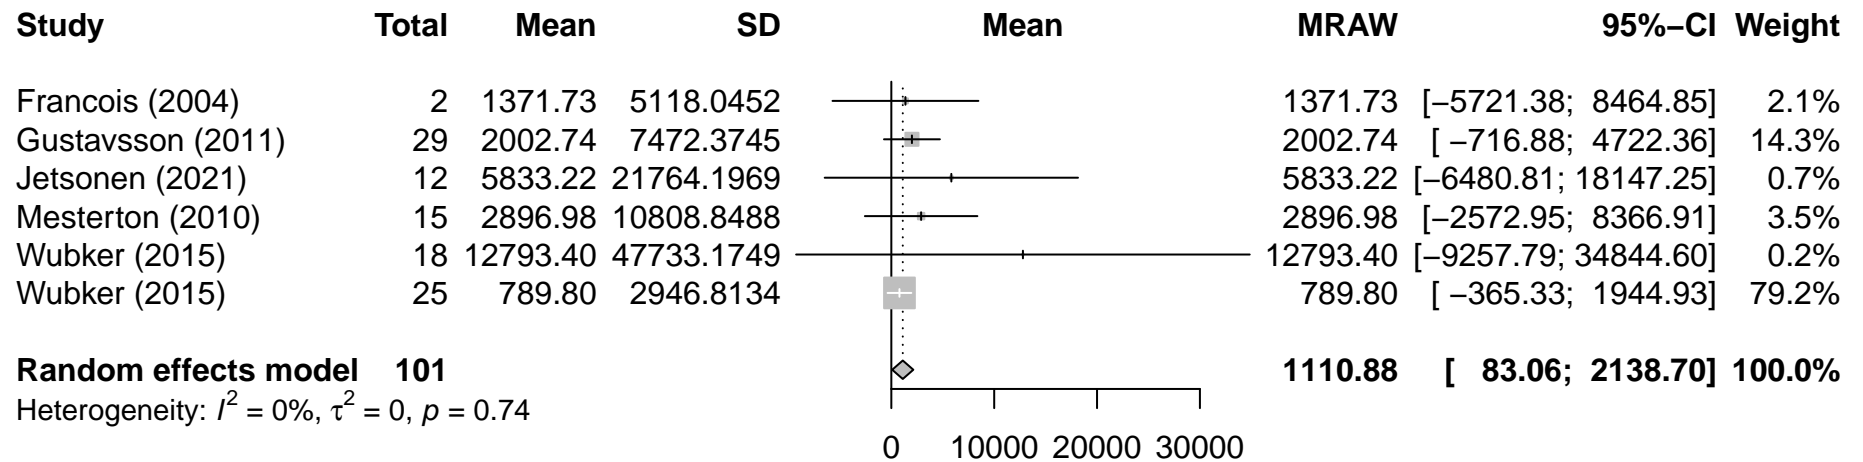

Nordics, Community, Severe, Outpatient care

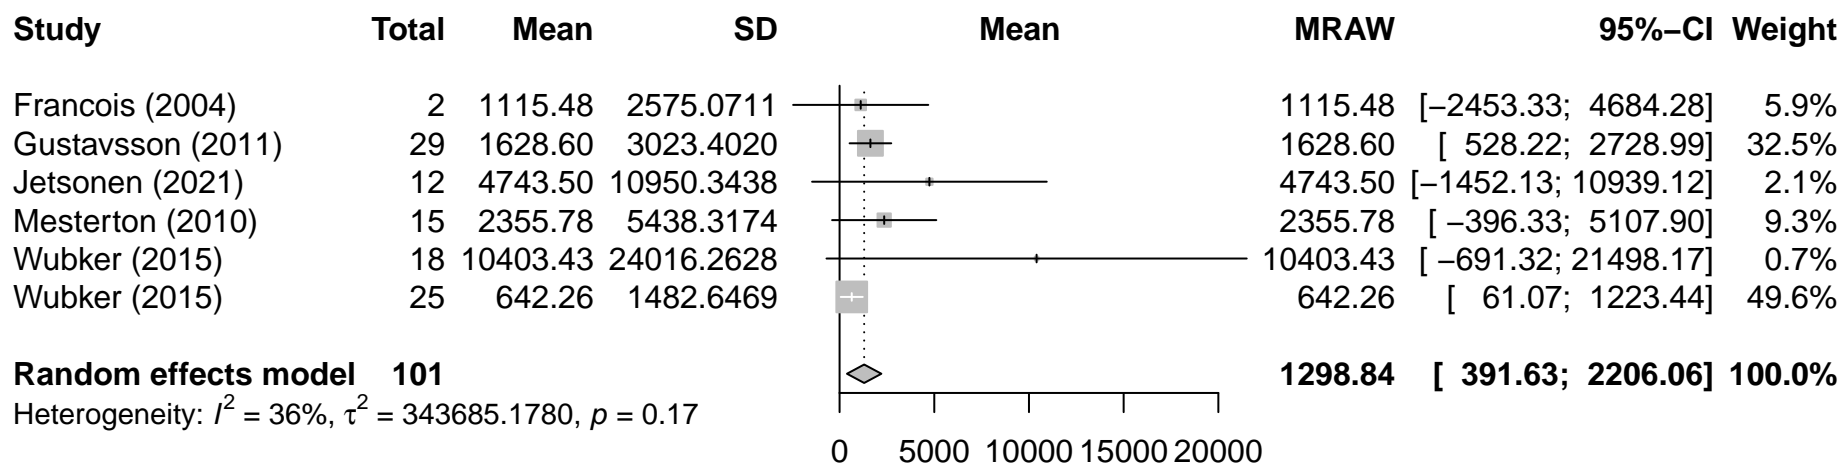

Nordics, Community, Severe, Pharmaceuticals

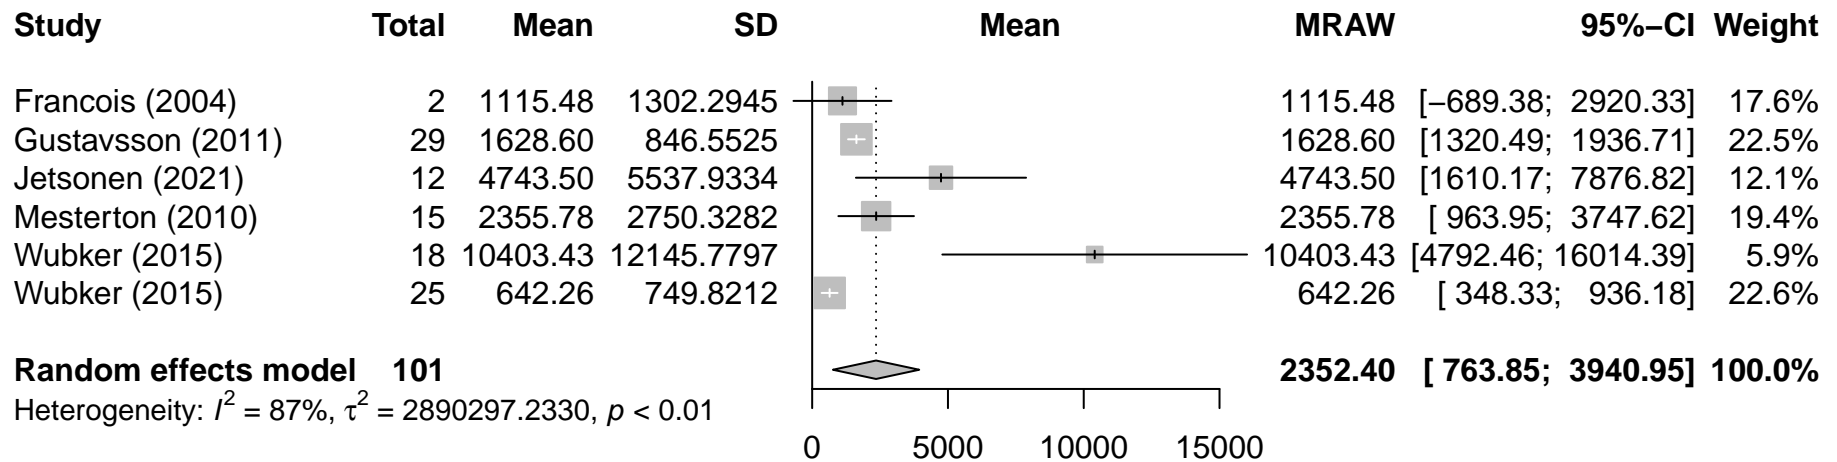

Nordics, Community, Severe, Institutional care

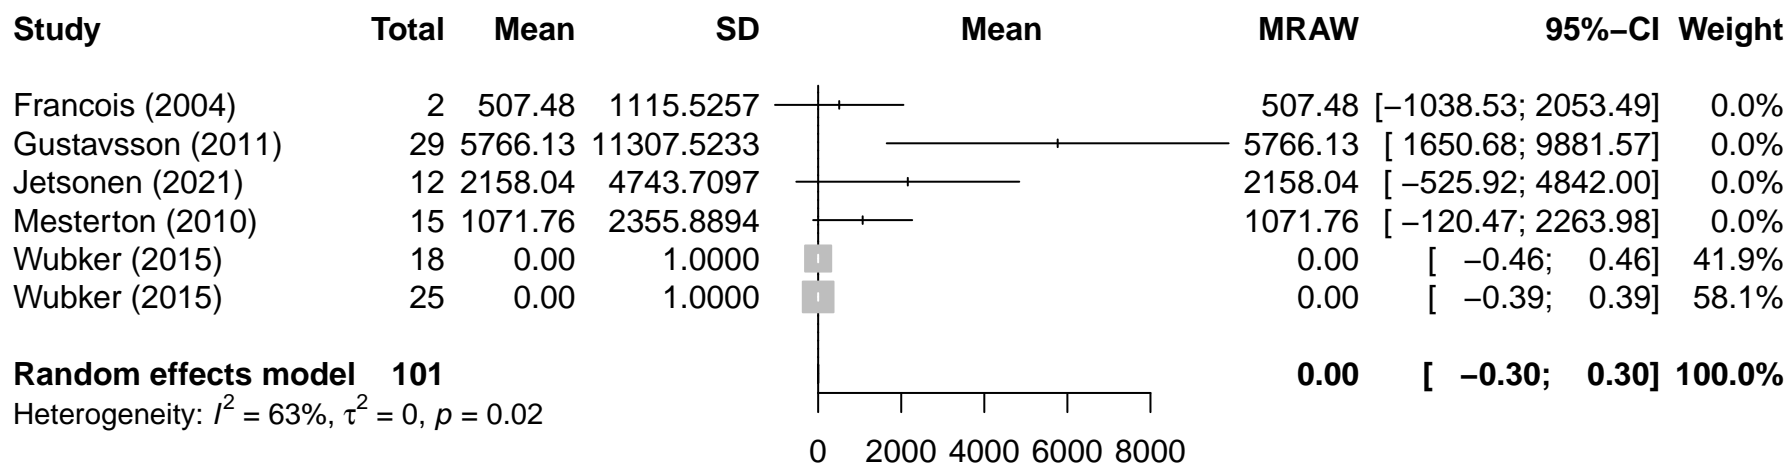

Nordics, Community, Severe, Community care

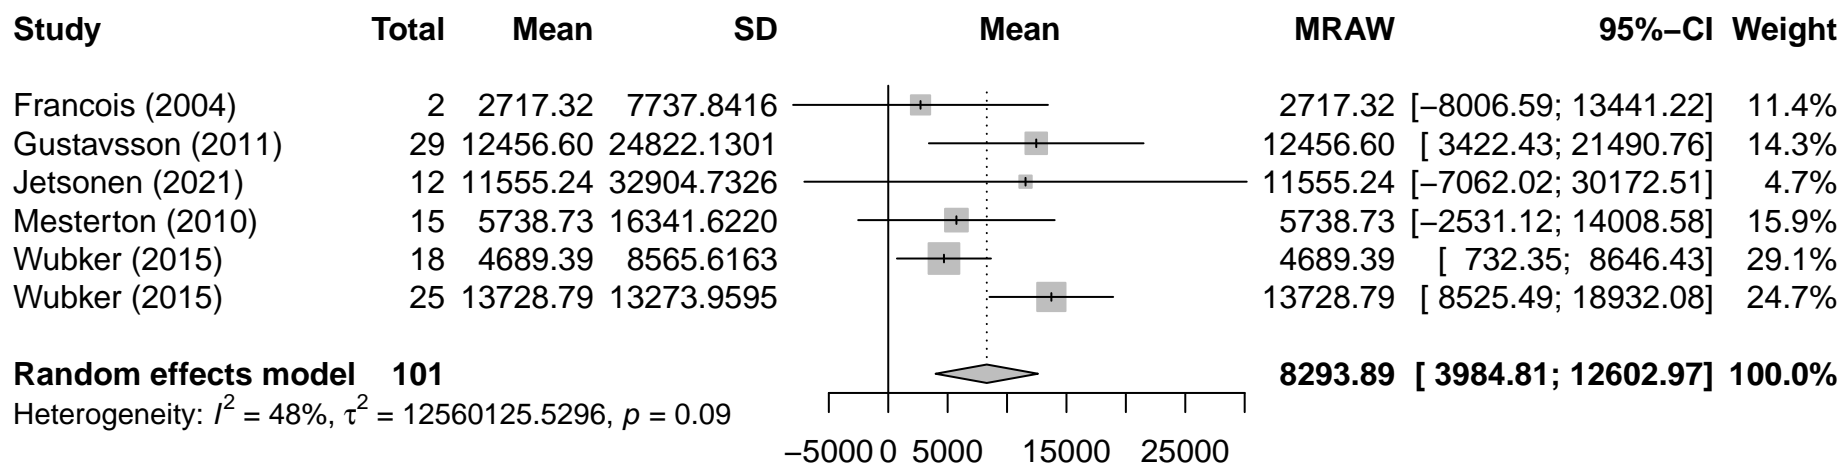

Nordics, Community, Severe, Caregiver work loss

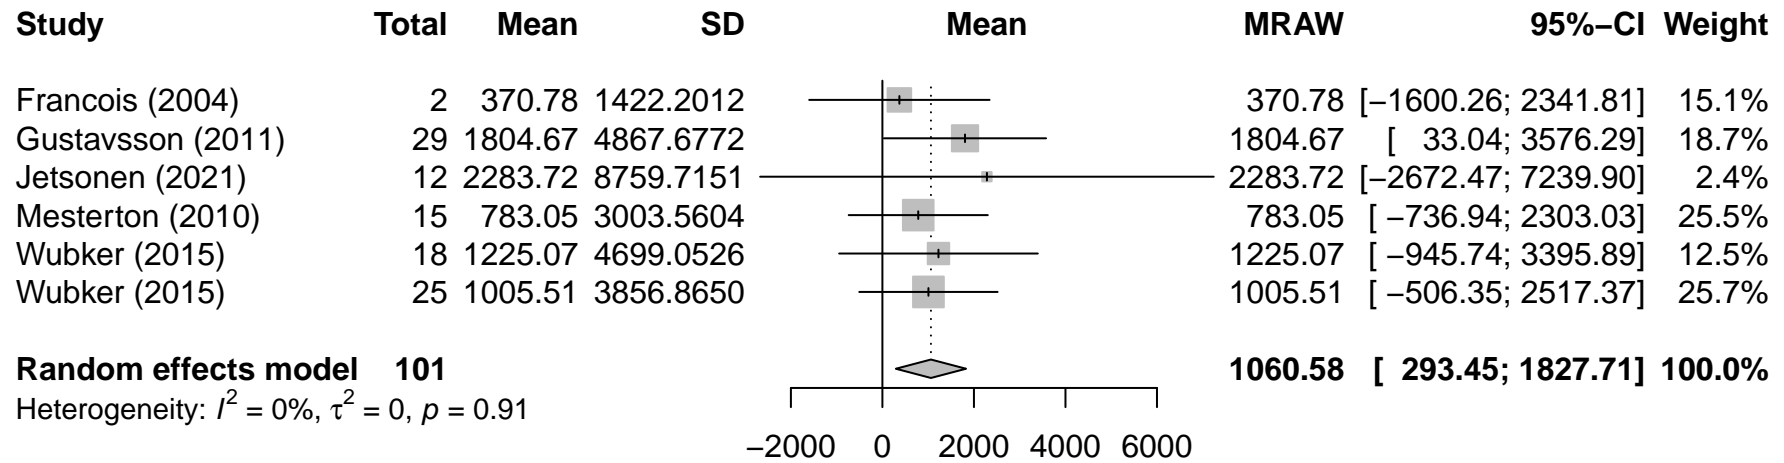



Nordics, Community, Severe, Caregiver time

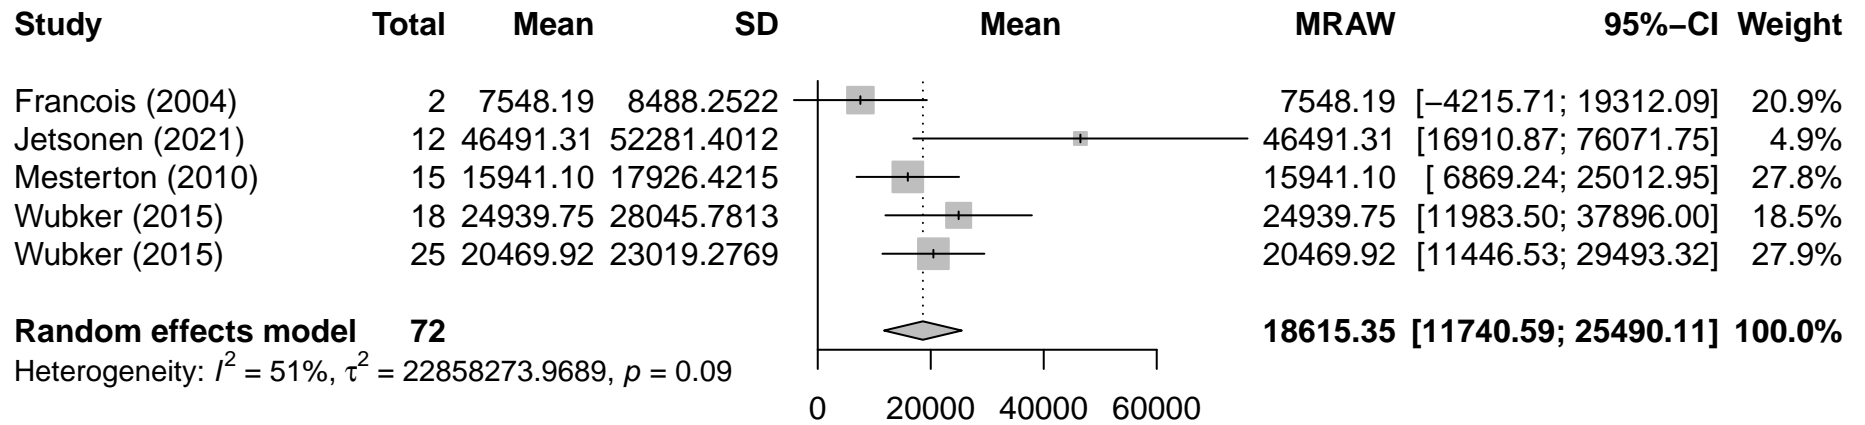

Nordics, Community, All, Inpatient care

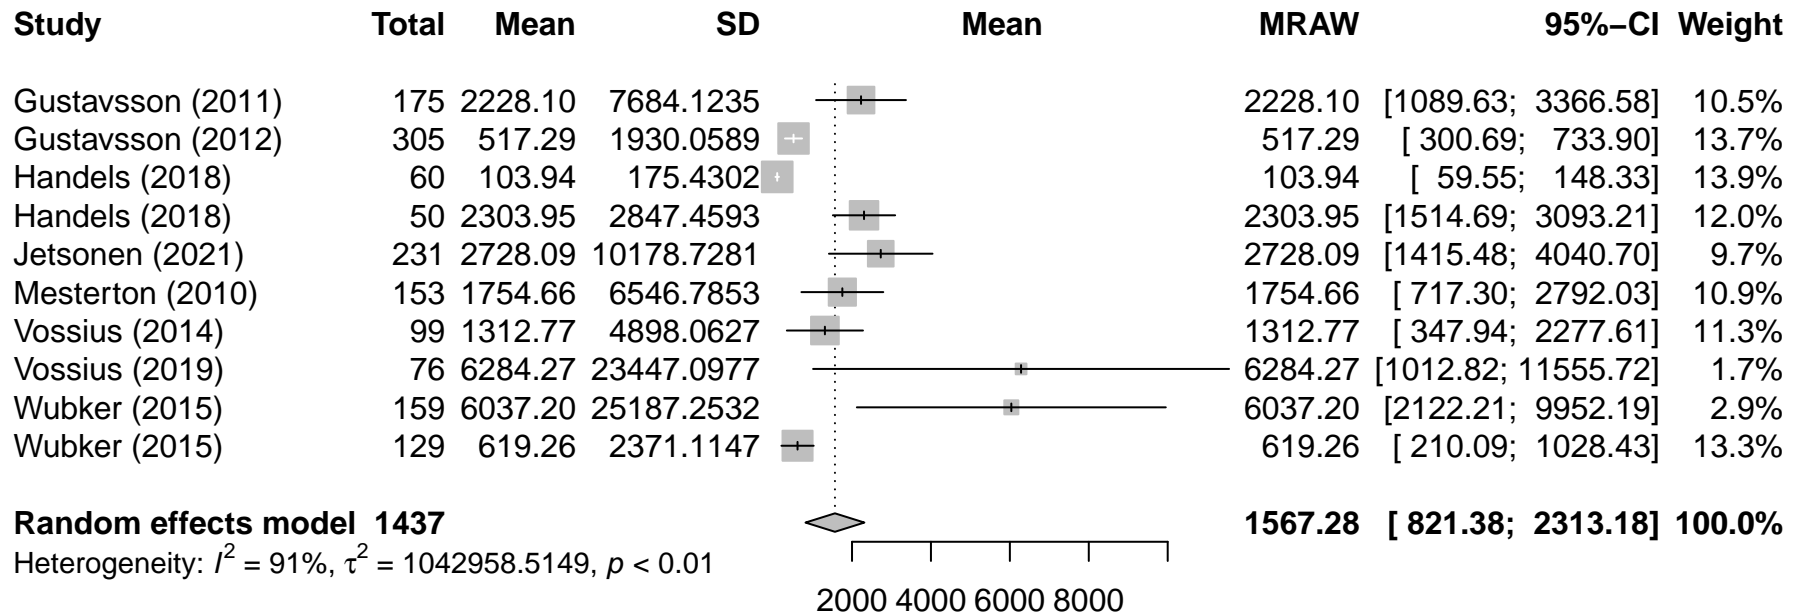

Nordics, Community, All, Outpatient care

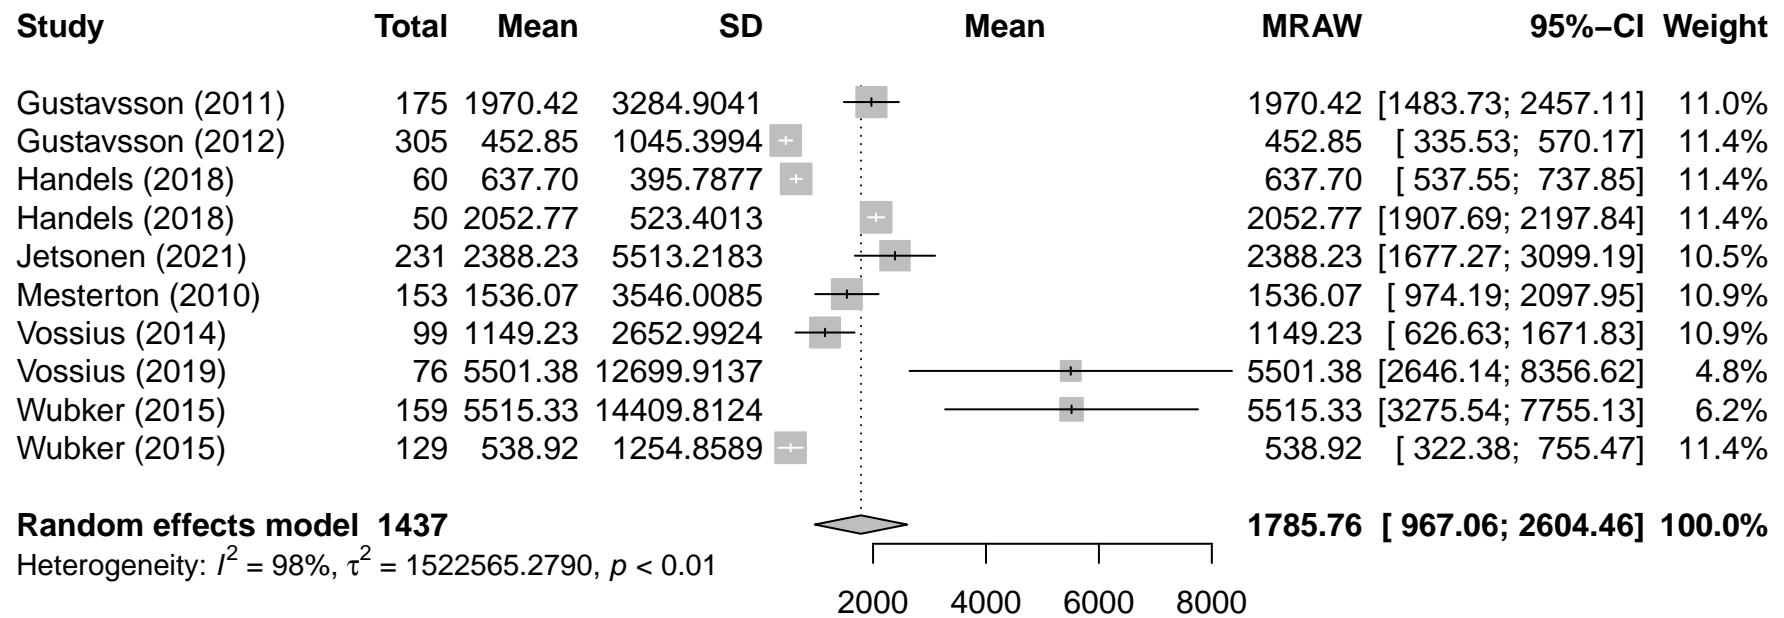

Nordics, Community, All, Pharmaceuticals

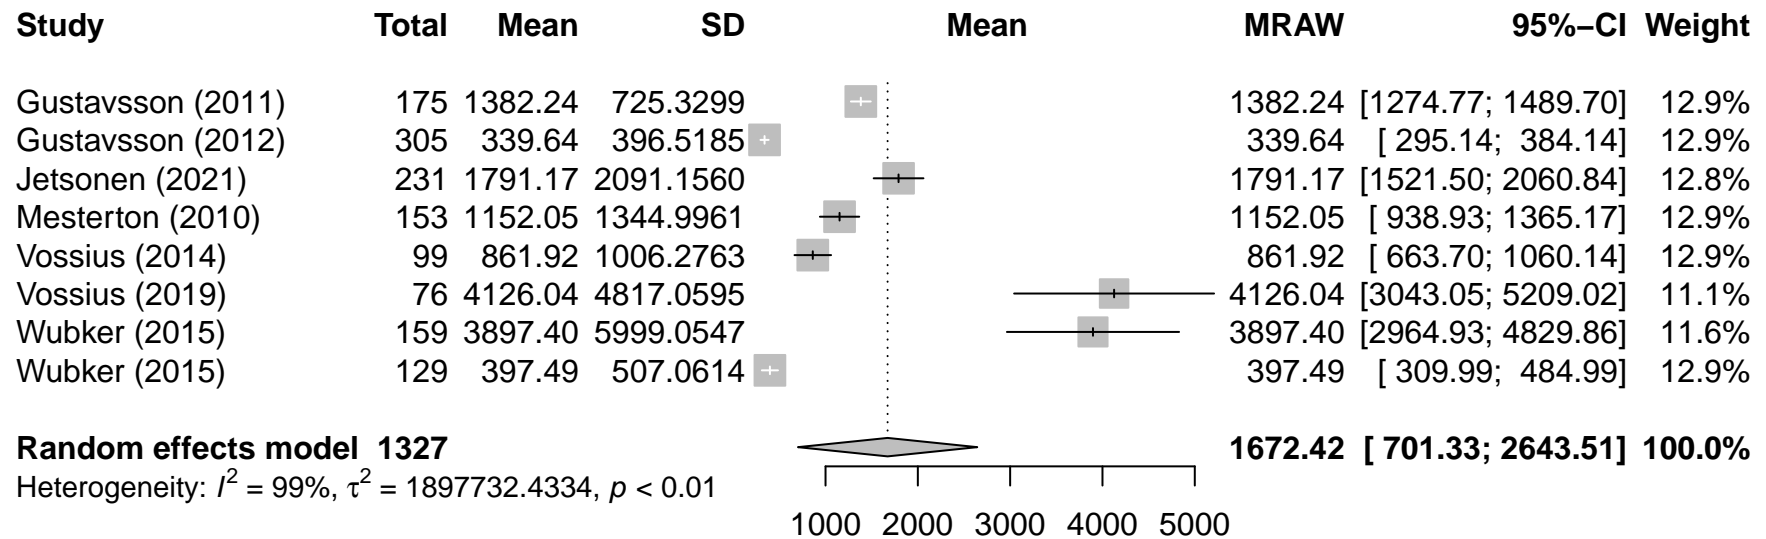

Nordics, Community, All, Institutional care

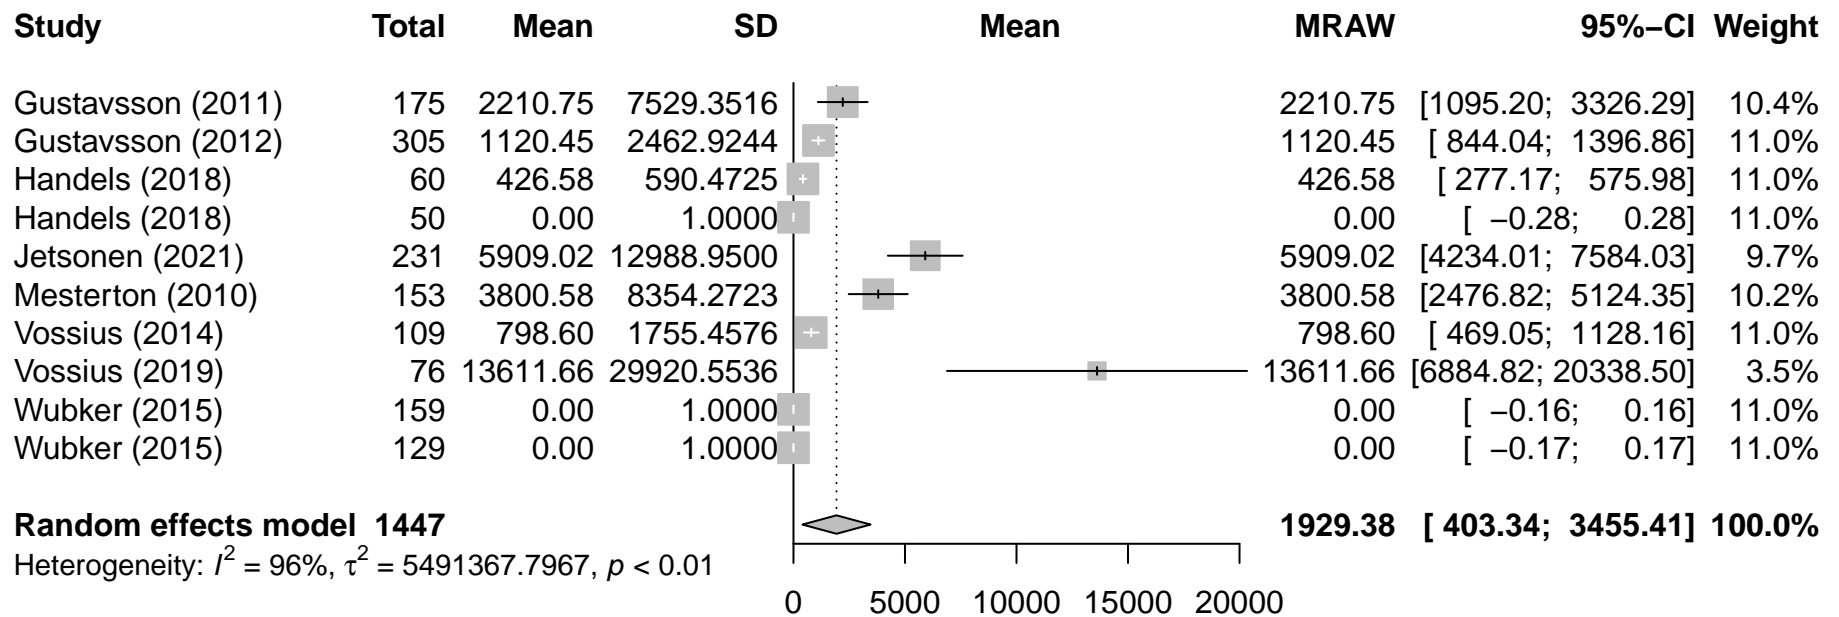

Nordics, Community, All, Community care

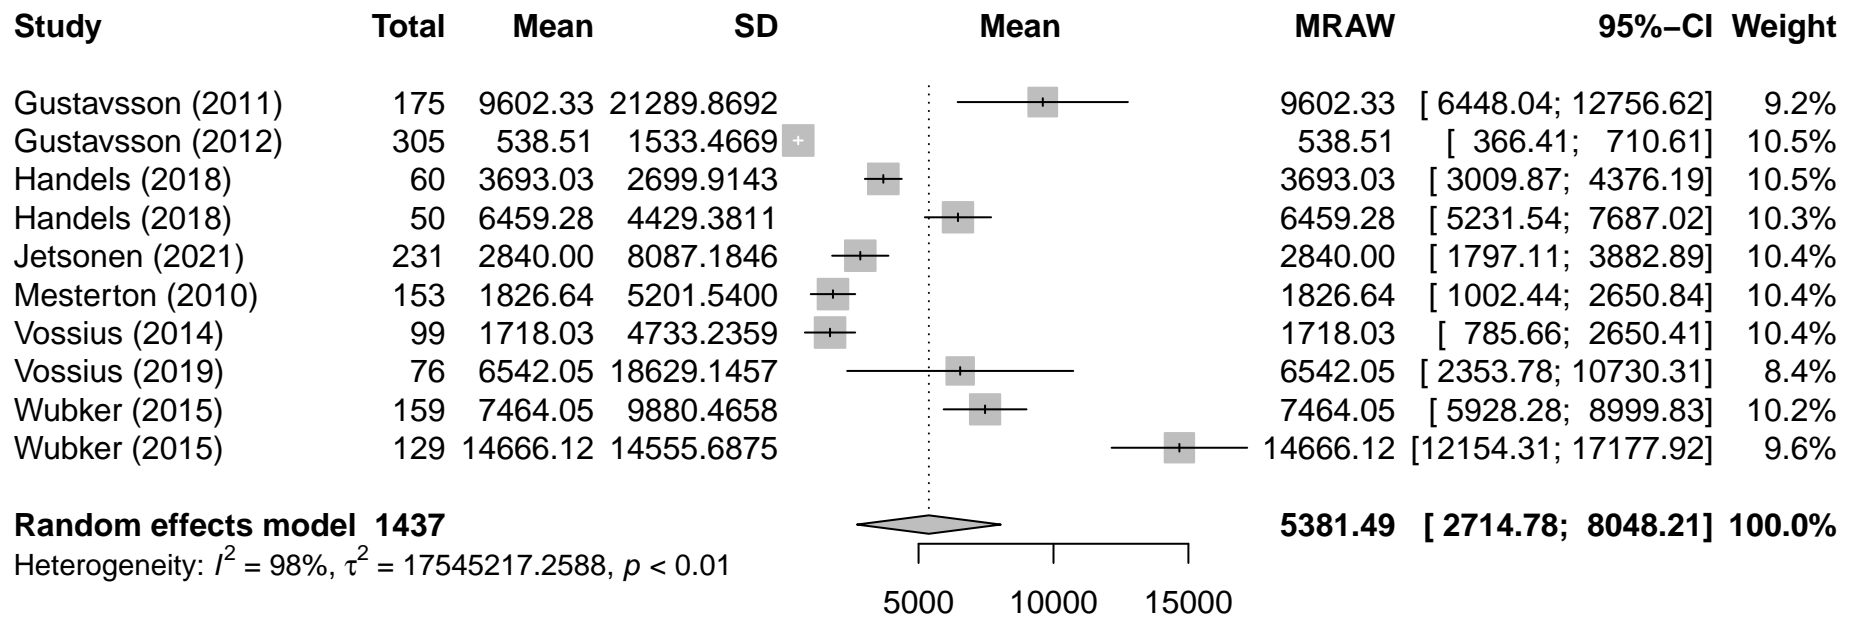

Nordics, Community, All, Caregiver work loss

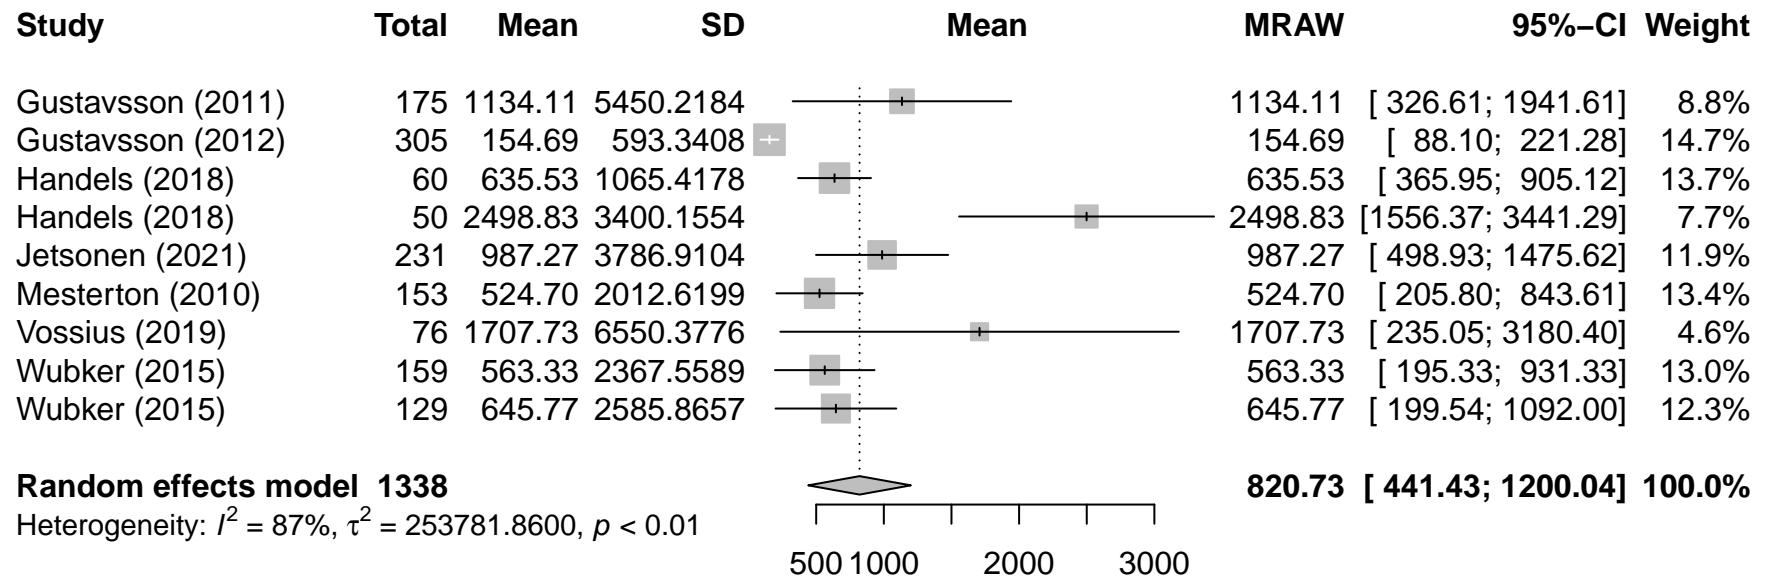

Nordics, Community, All, Caregiver time

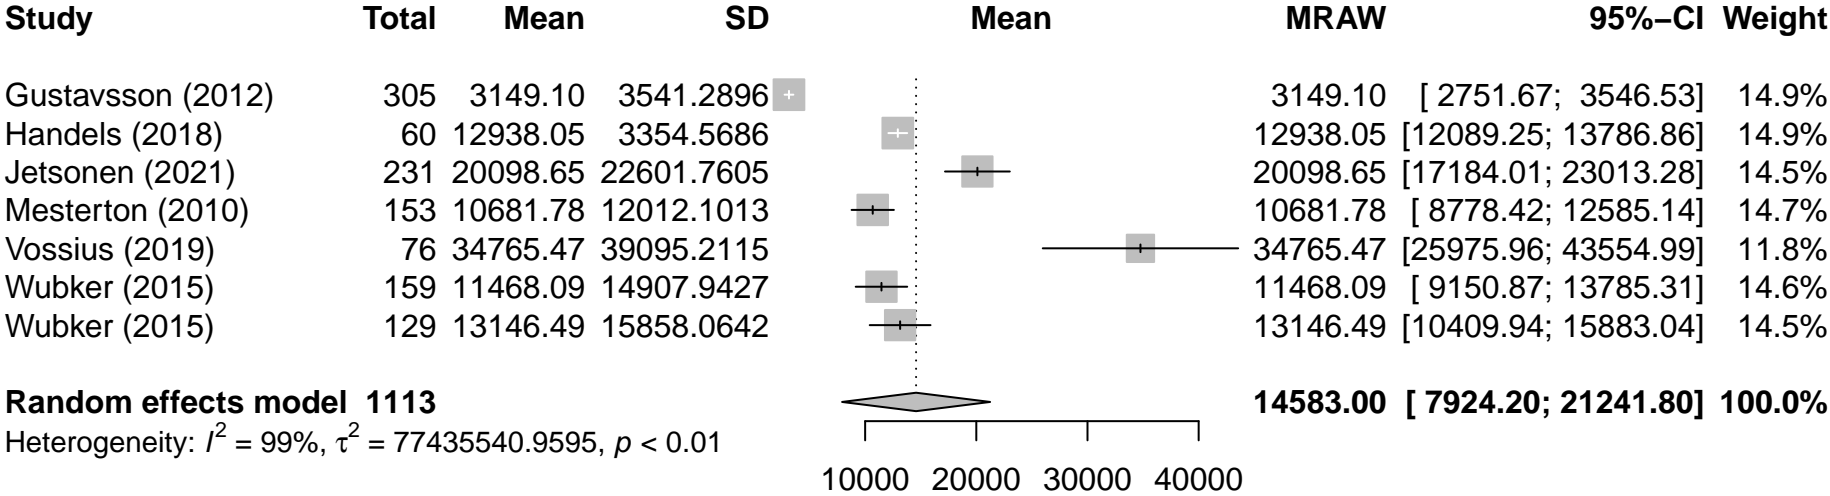



Nordics, Institution, Mild, Inpatient care

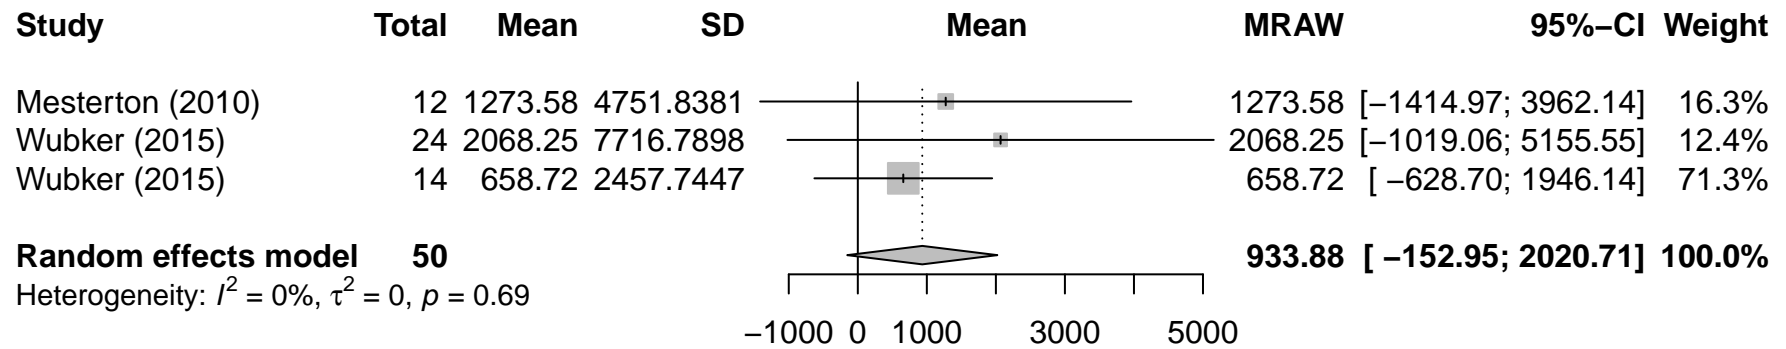

Nordics, Institution, Mild, Outpatient care

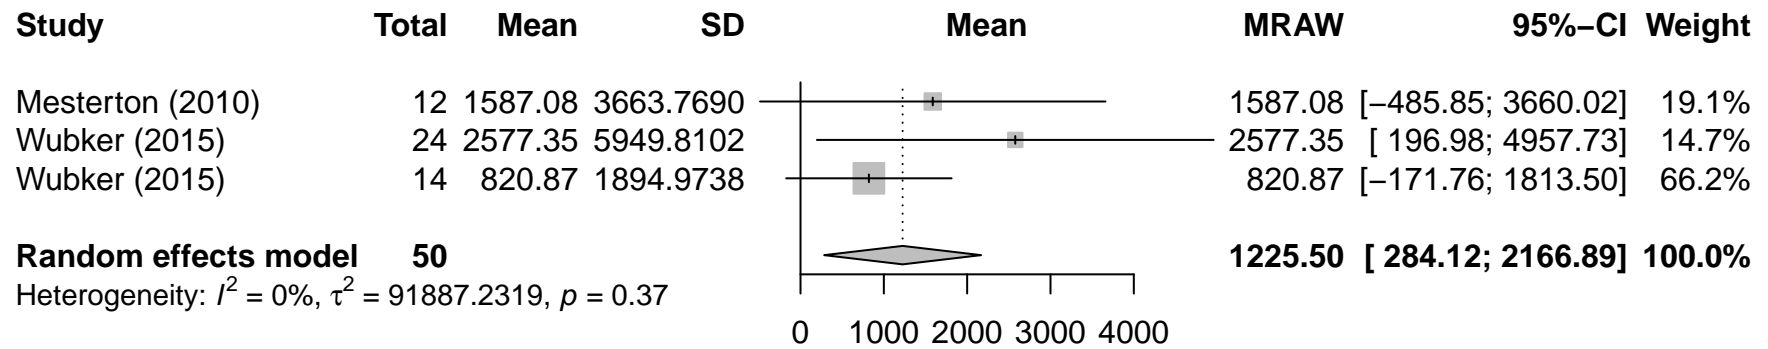

Nordics, Institution, Mild, Pharmaceuticals

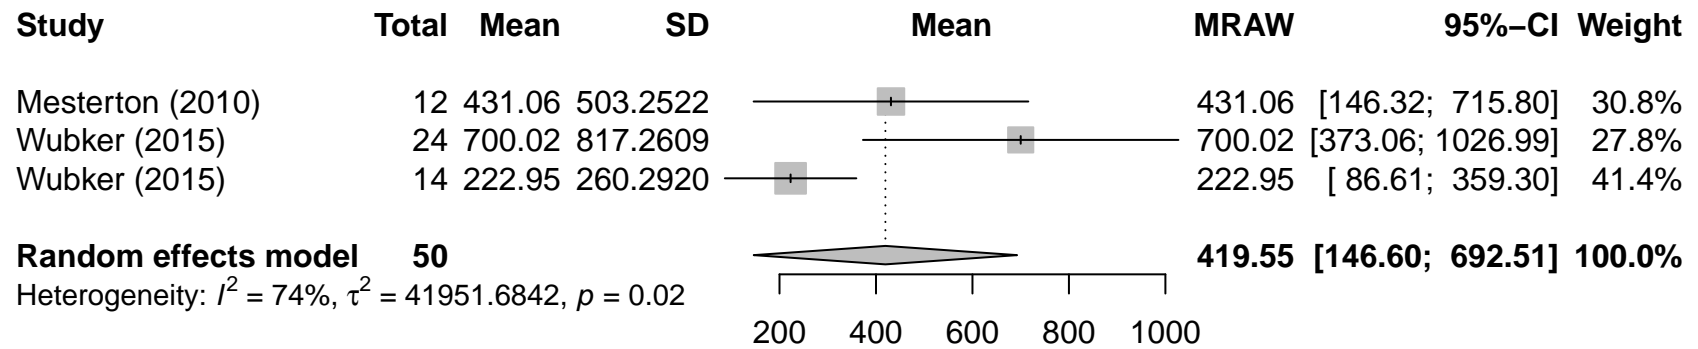

Nordics, Institution, Mild, Institutional care

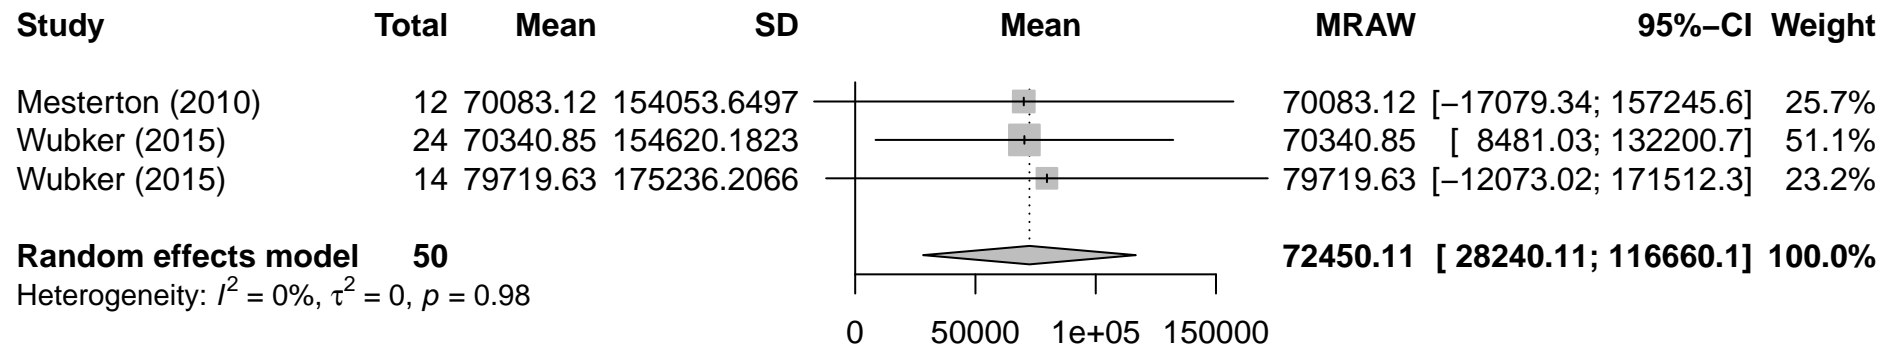

Nordics, Institution, Mild, Community care

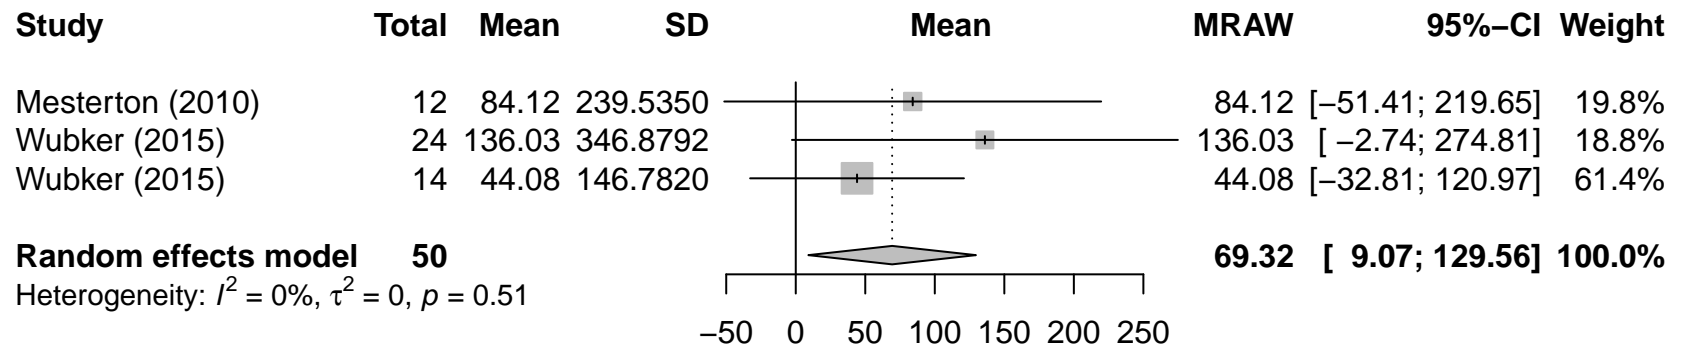

Nordics, Institution, Mild, Caregiver work loss

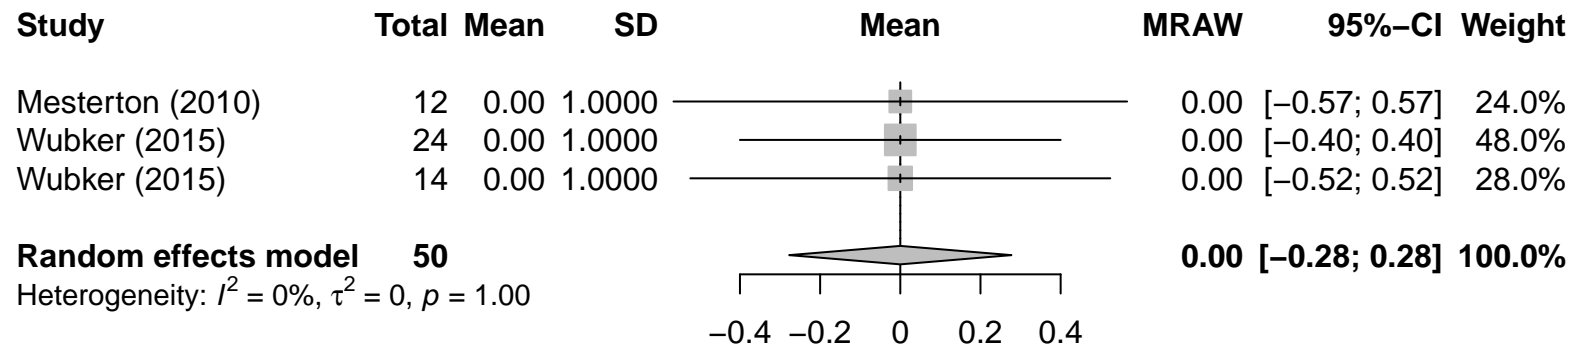

Nordics, Institution, Mild, Caregiver time

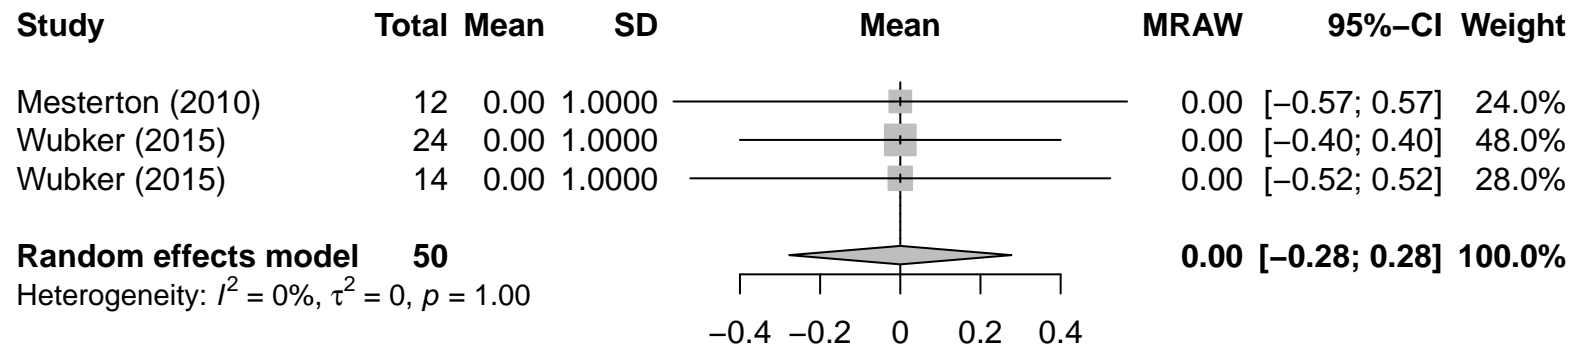

Nordics, Institution, Moderate, Inpatient care

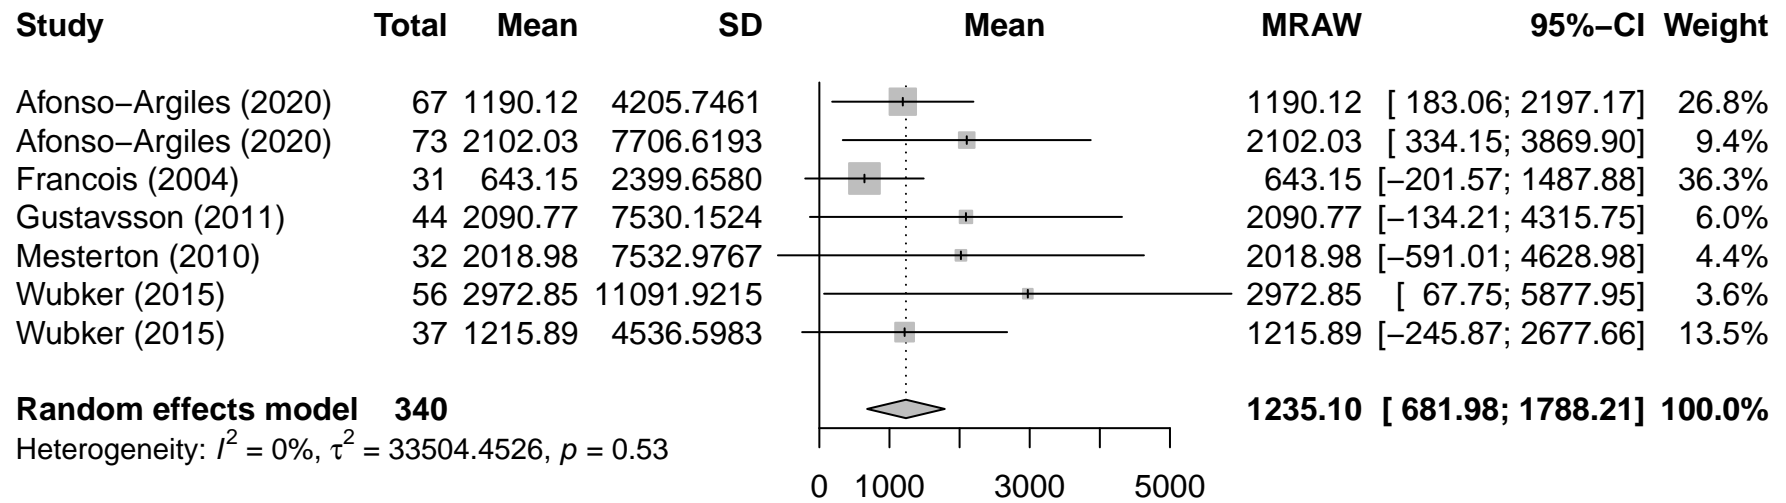



Nordics, Institution, Moderate, Outpatient care

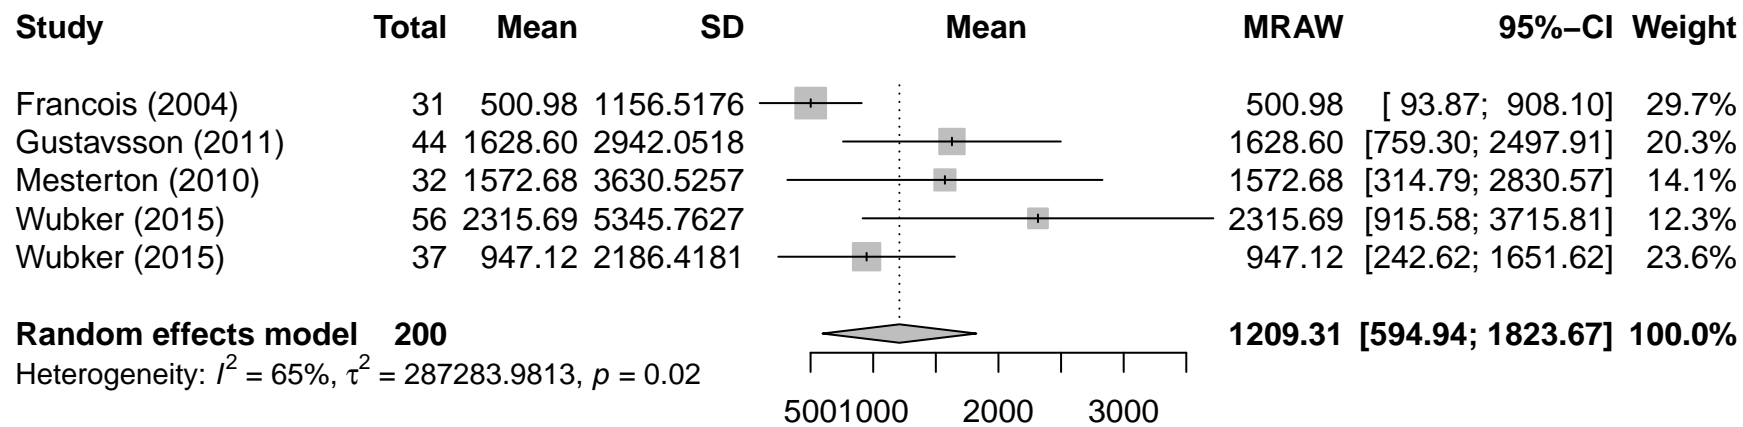

Nordics, Institution, Moderate, Pharmaceuticals

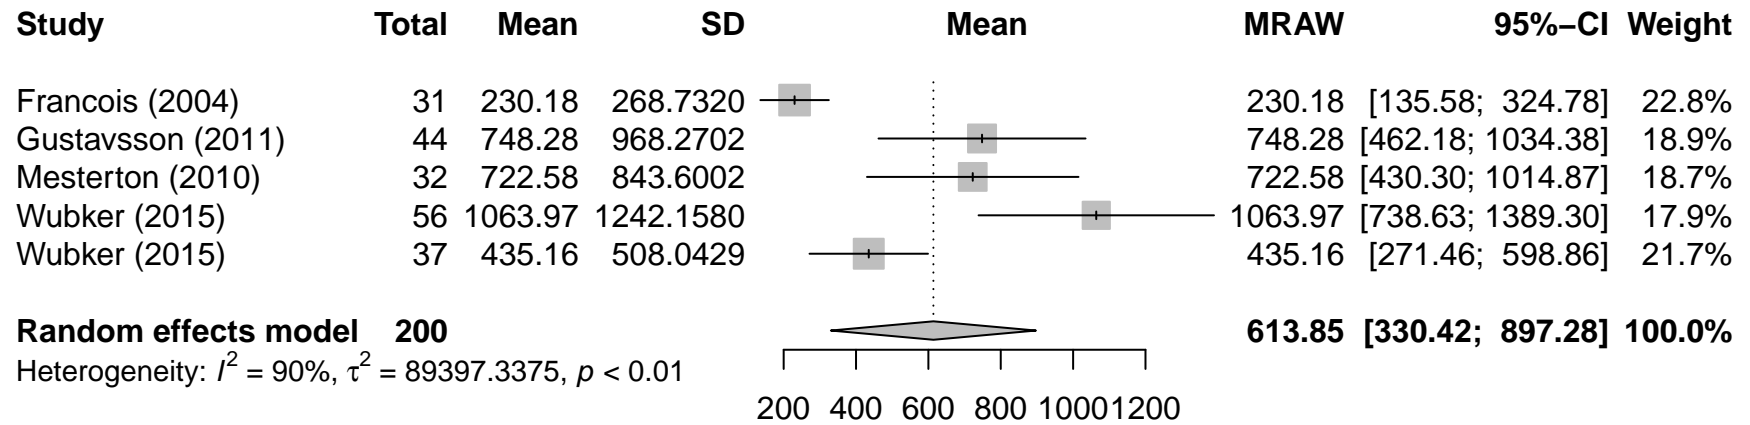

Nordics, Institution, Moderate, Institutional care

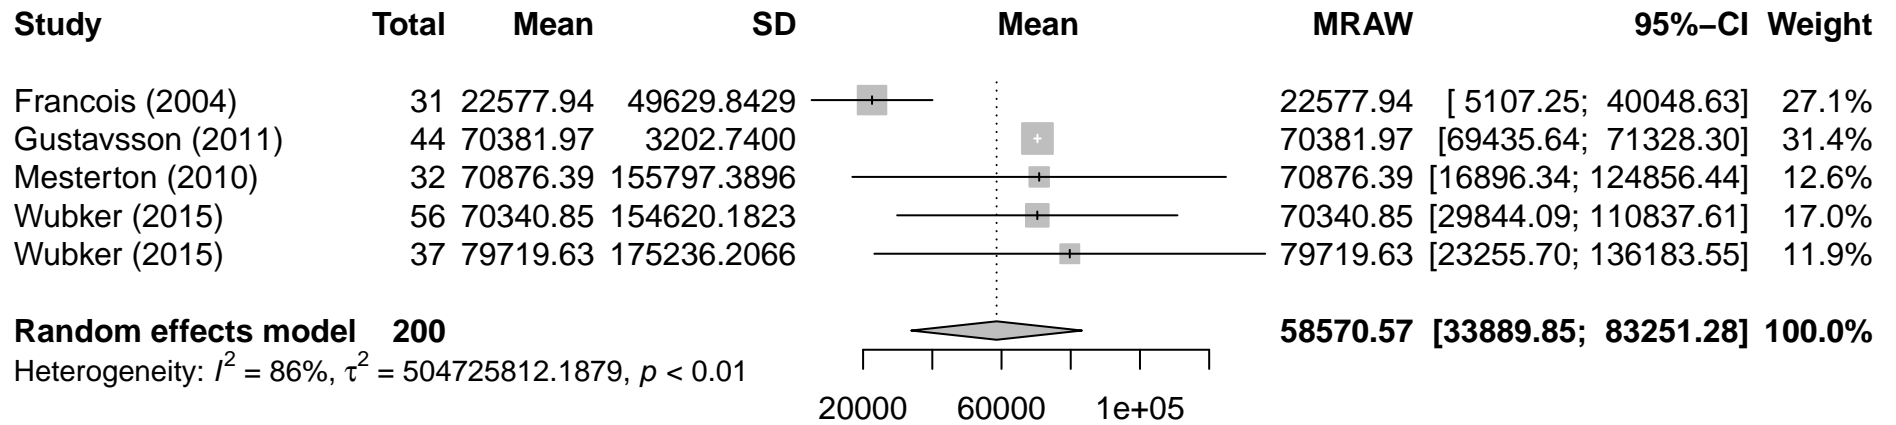

Nordics, Institution, Moderate, Community care

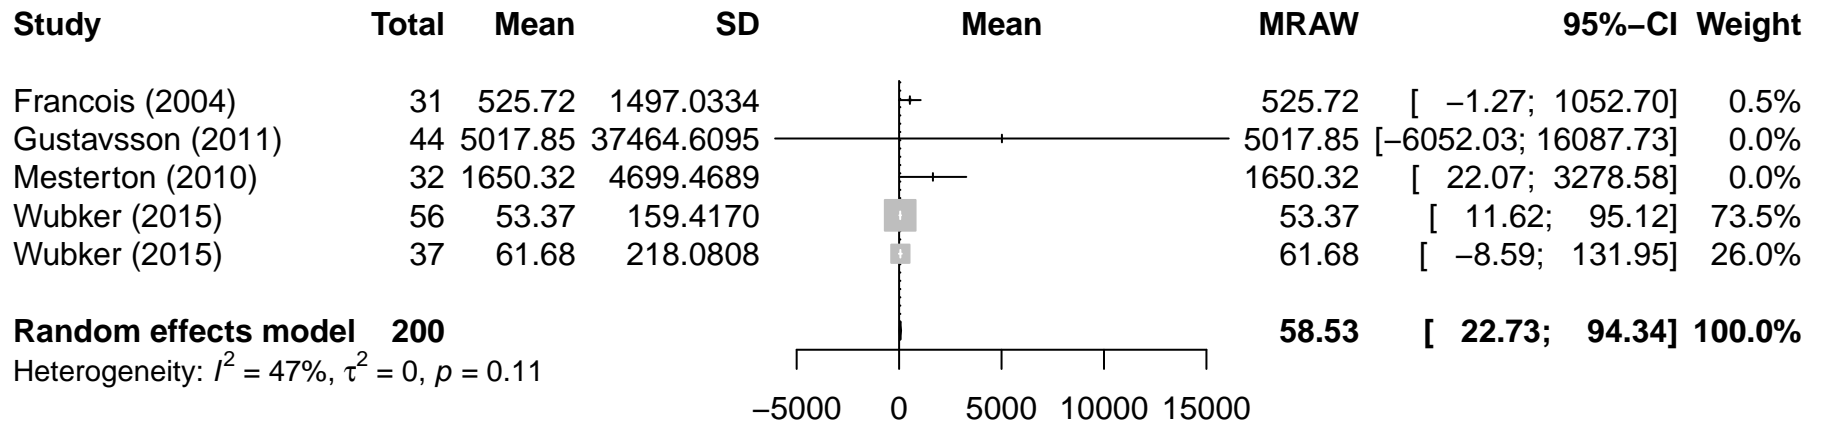

Nordics, Institution, Moderate, Caregiver work loss

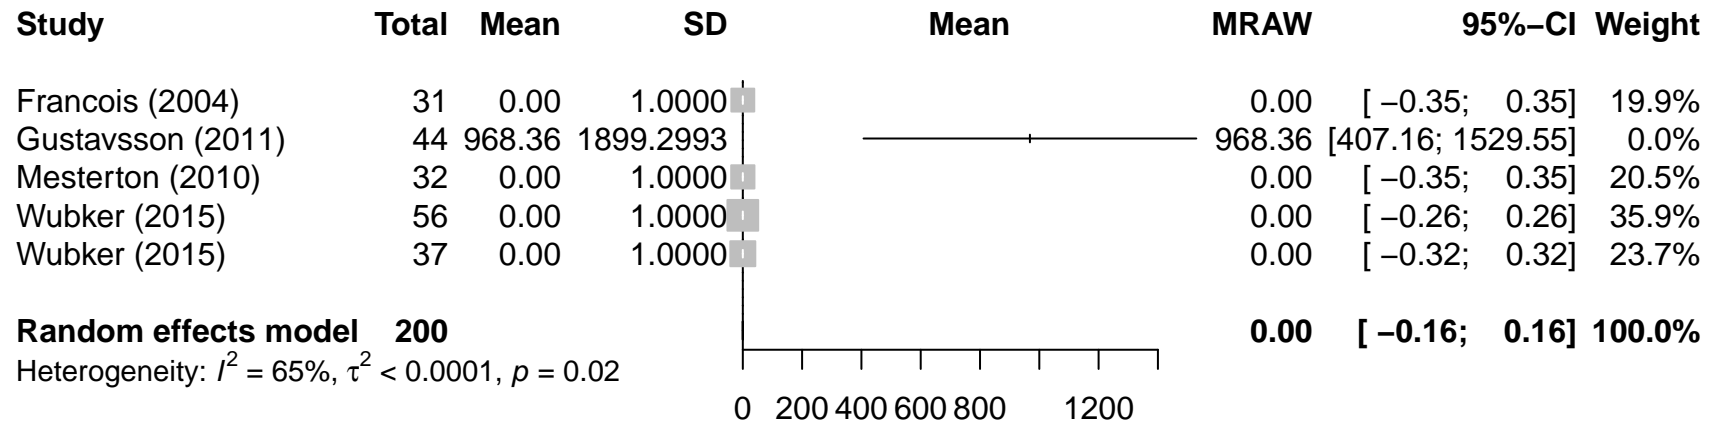

Nordics, Institution, Moderate, Caregiver time

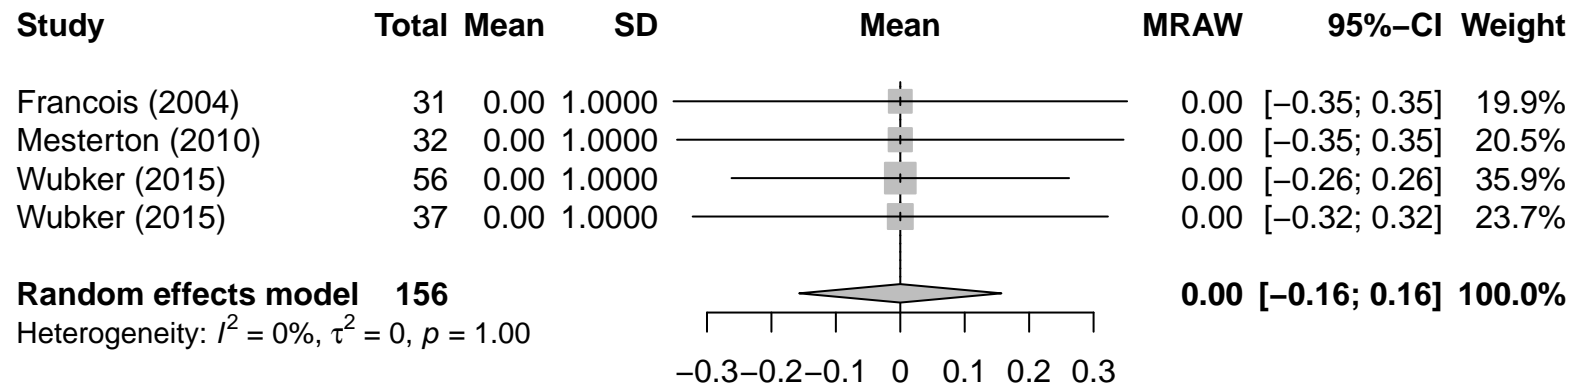

Nordics, Institution, Severe, Inpatient care

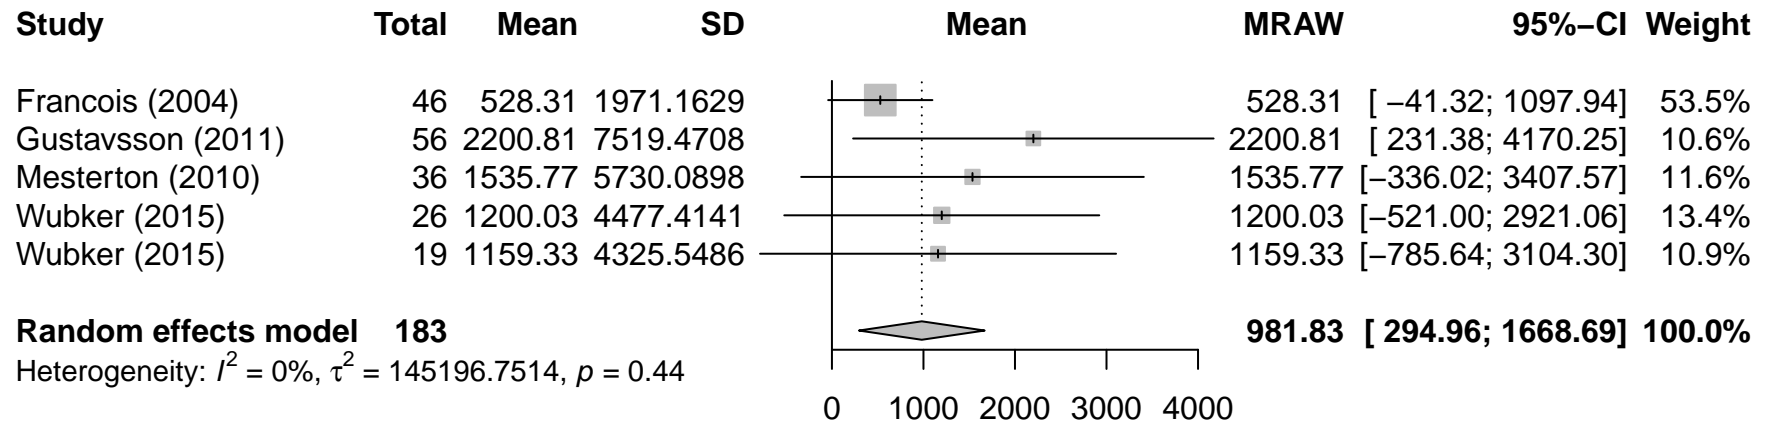

Nordics, Institution, Severe, Outpatient care

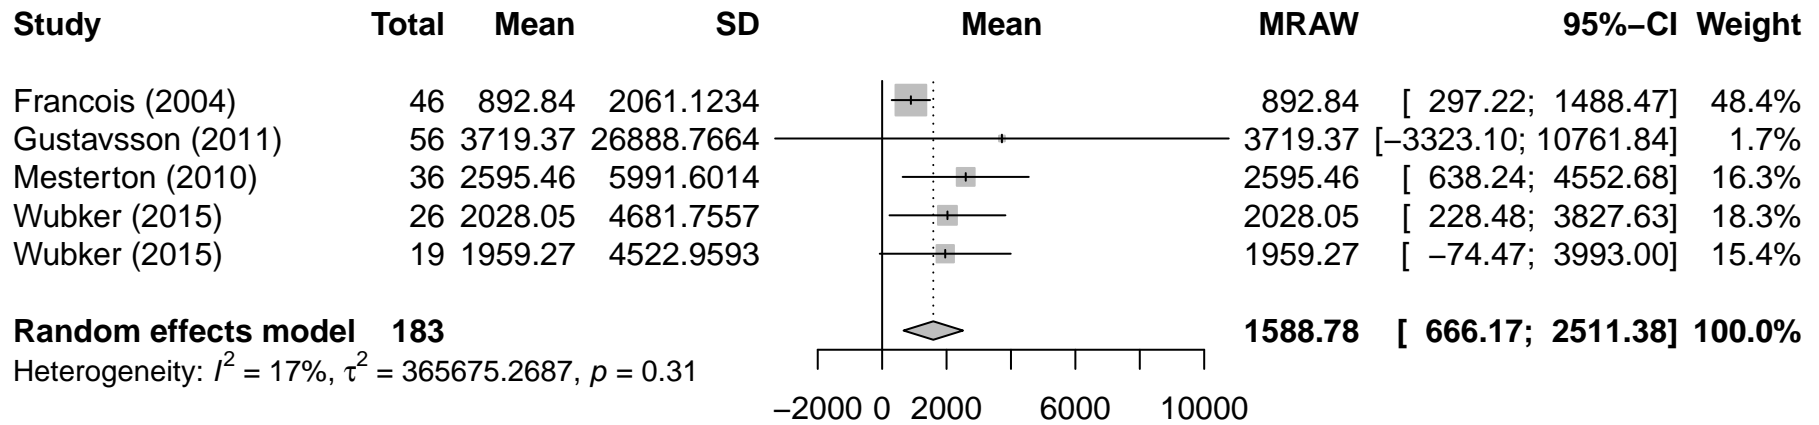



Nordics, Institution, Severe, Pharmaceuticals

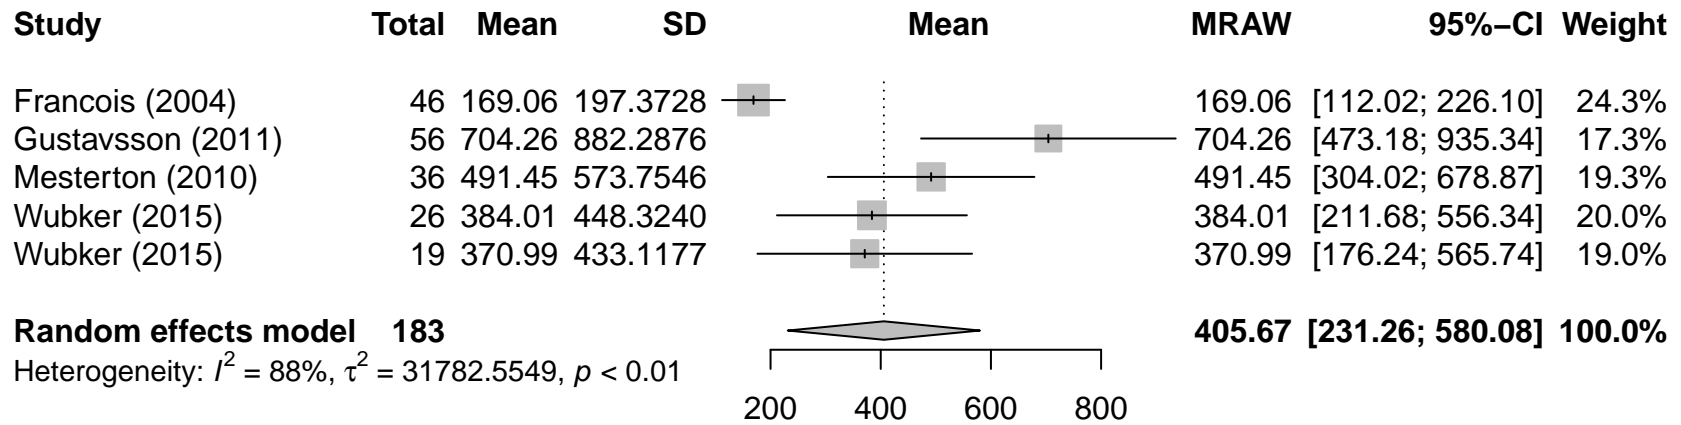

Nordics, Institution, Severe, Institutional care

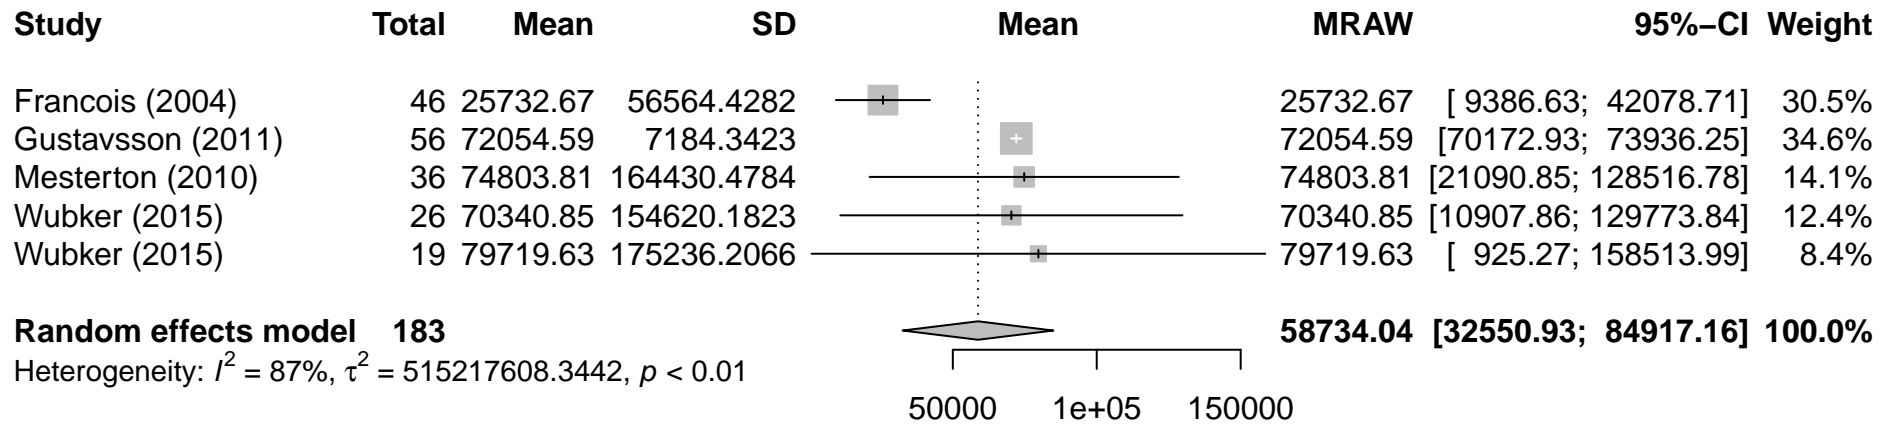

Nordics, Institution, Severe, Community care

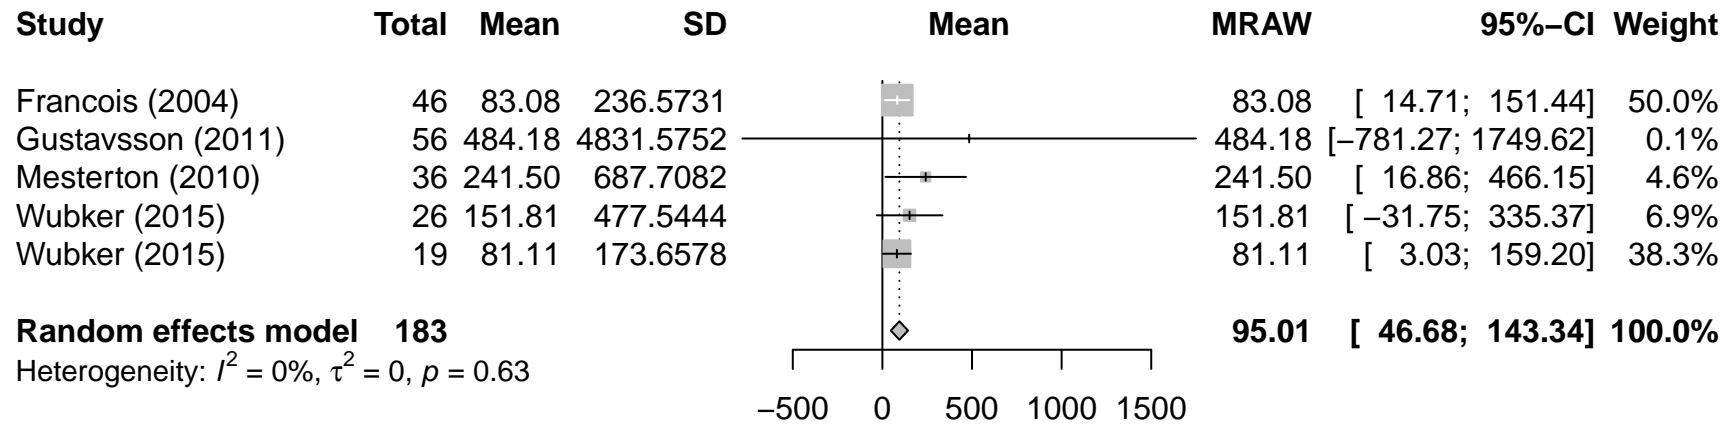

Nordics, Institution, Severe, Caregiver work loss

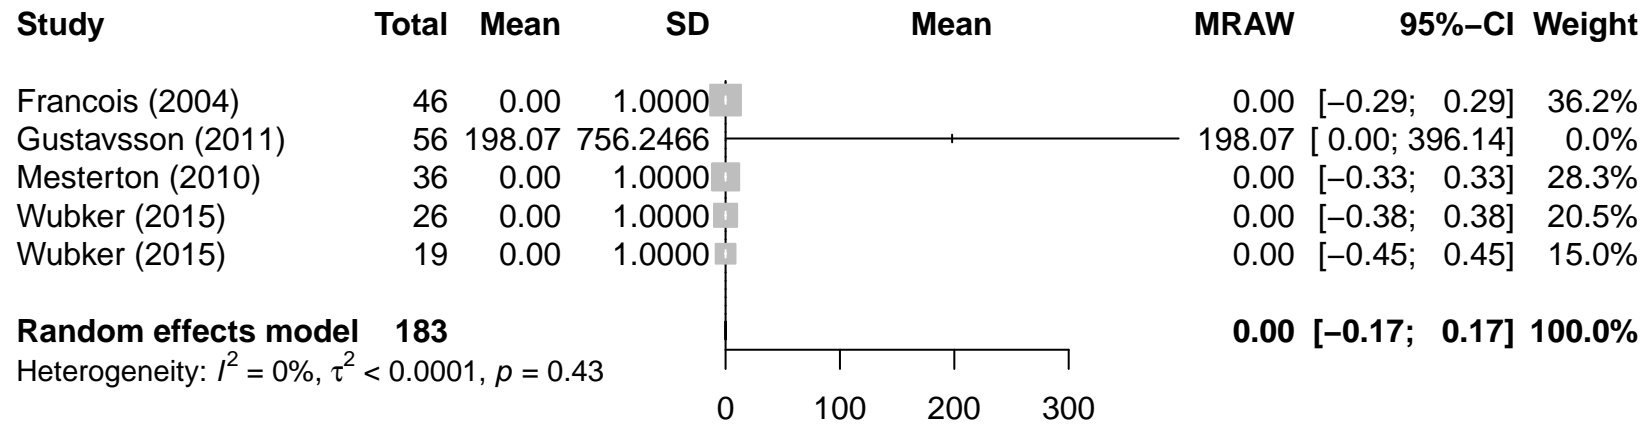

Nordics, Institution, Severe, Caregiver time

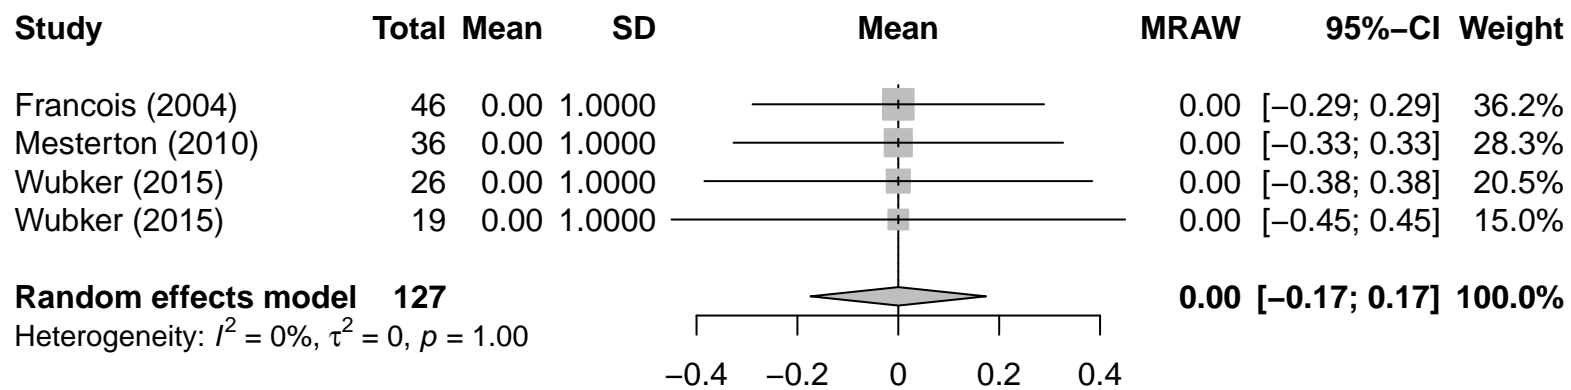

Nordics, Institution, All, Inpatient care

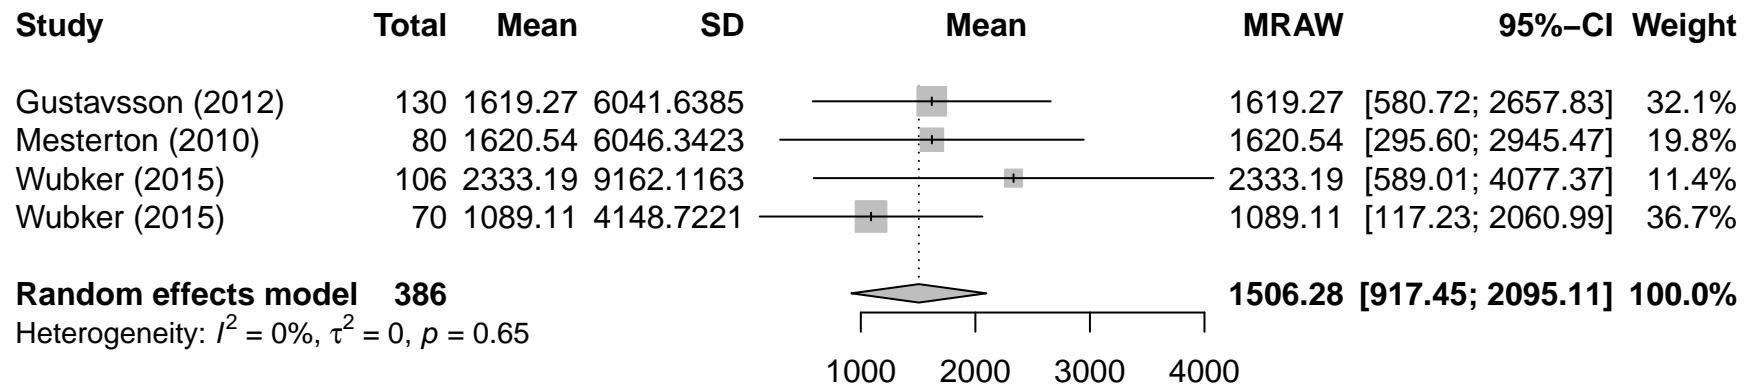

Nordics, Institution, All, Outpatient care

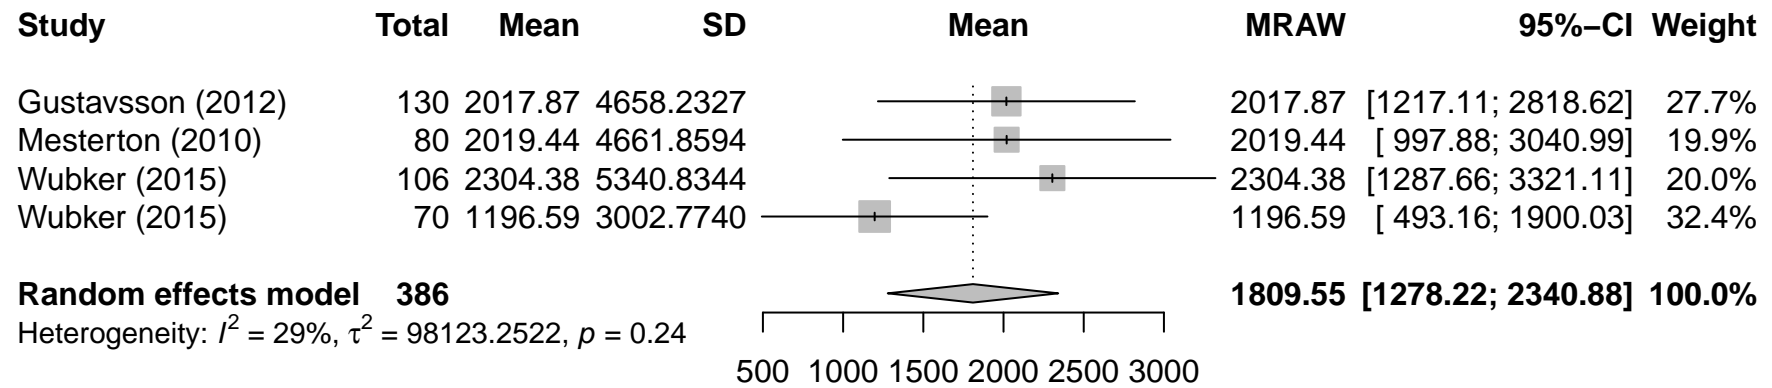

Nordics, Institution, All, Pharmaceuticals

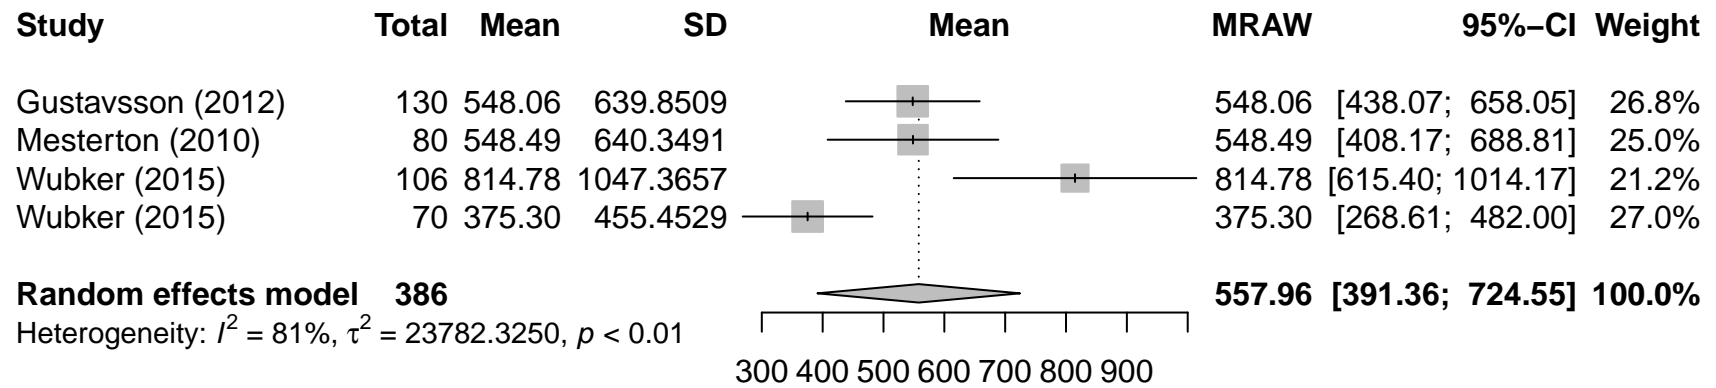



Nordics, Institution, All, Institutional care

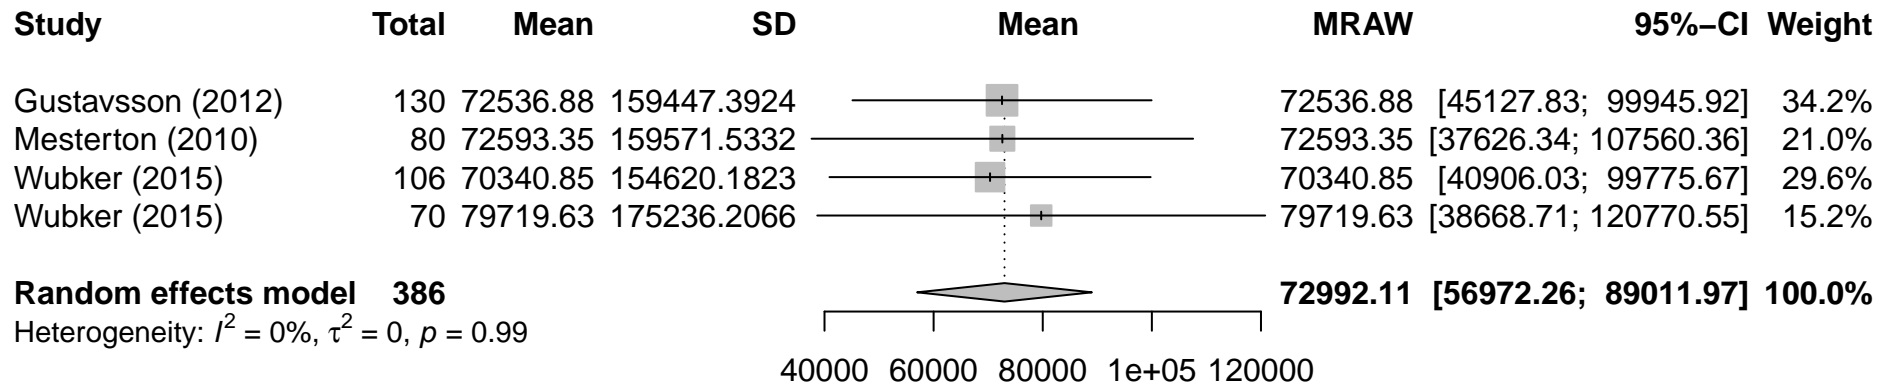

Nordics, Institution, All, Community care

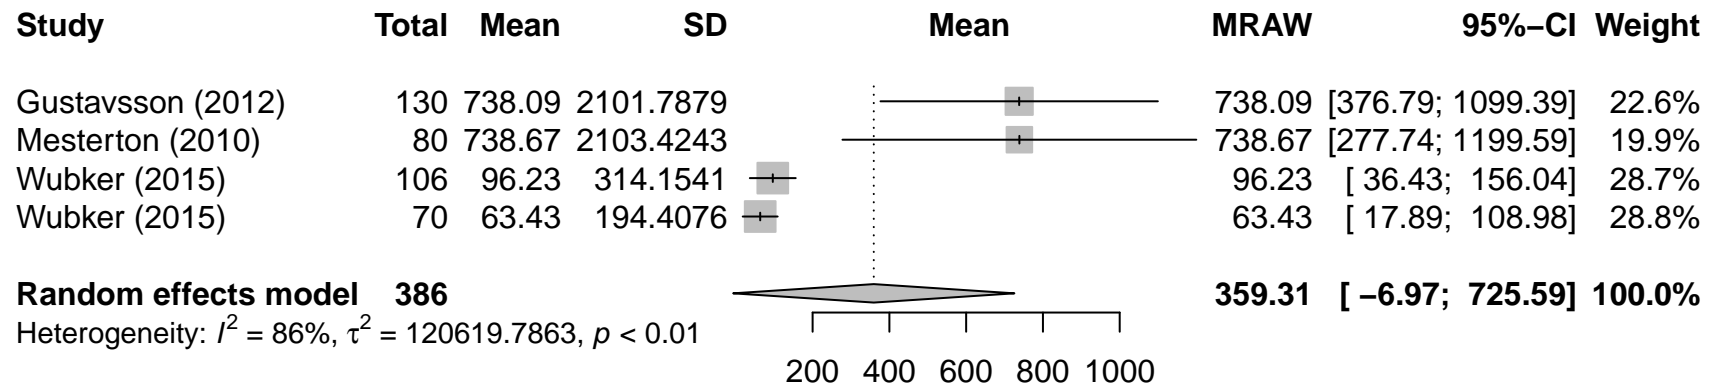

Nordics, Institution, All, Caregiver work loss

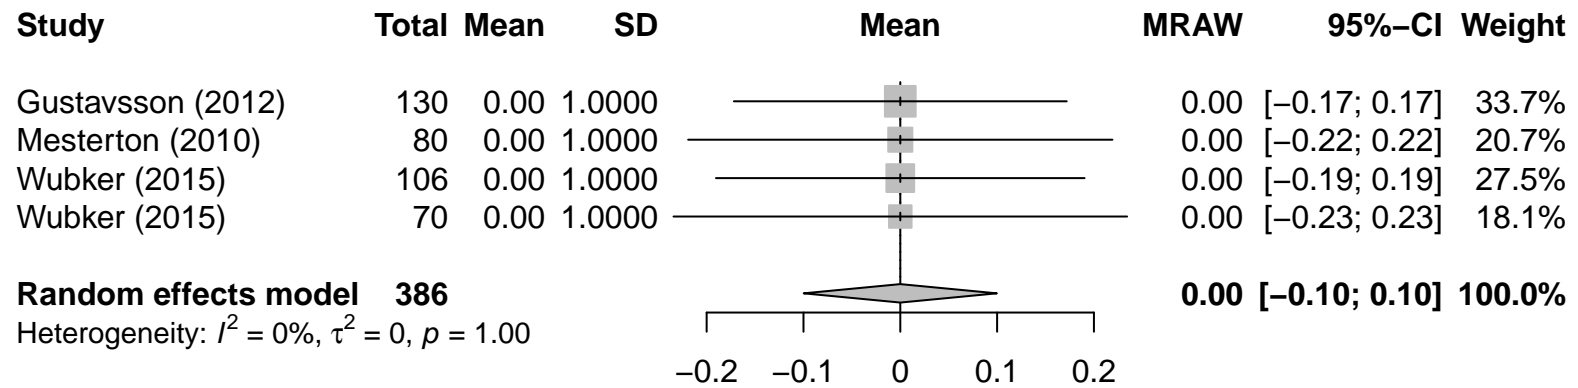

Nordics, Institution, All, Caregiver time

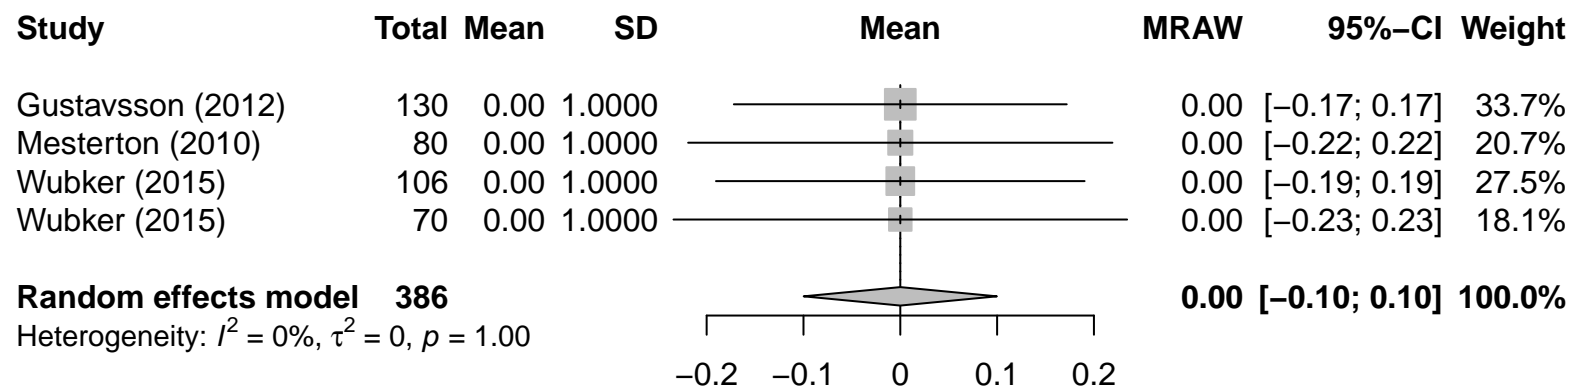

Nordics, All, Mild, Inpatient care

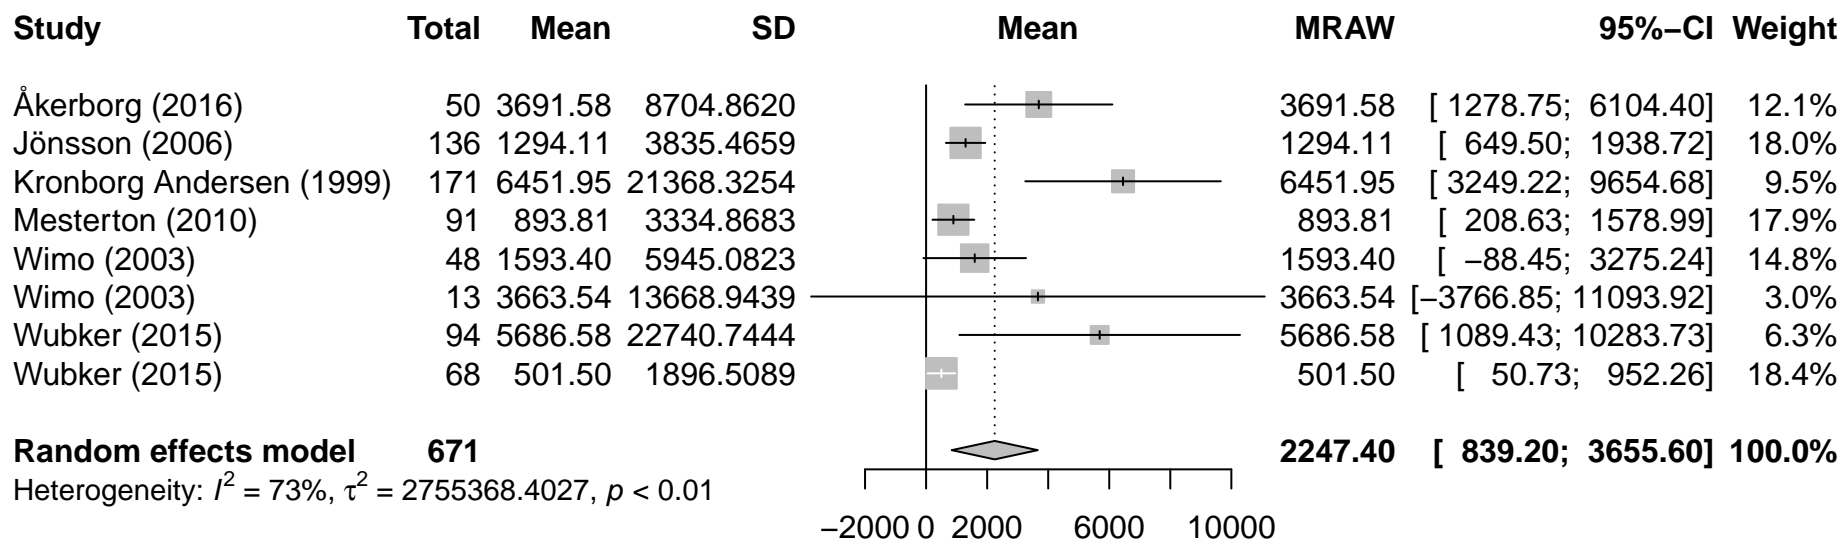

Nordics, All, Mild, Outpatient care

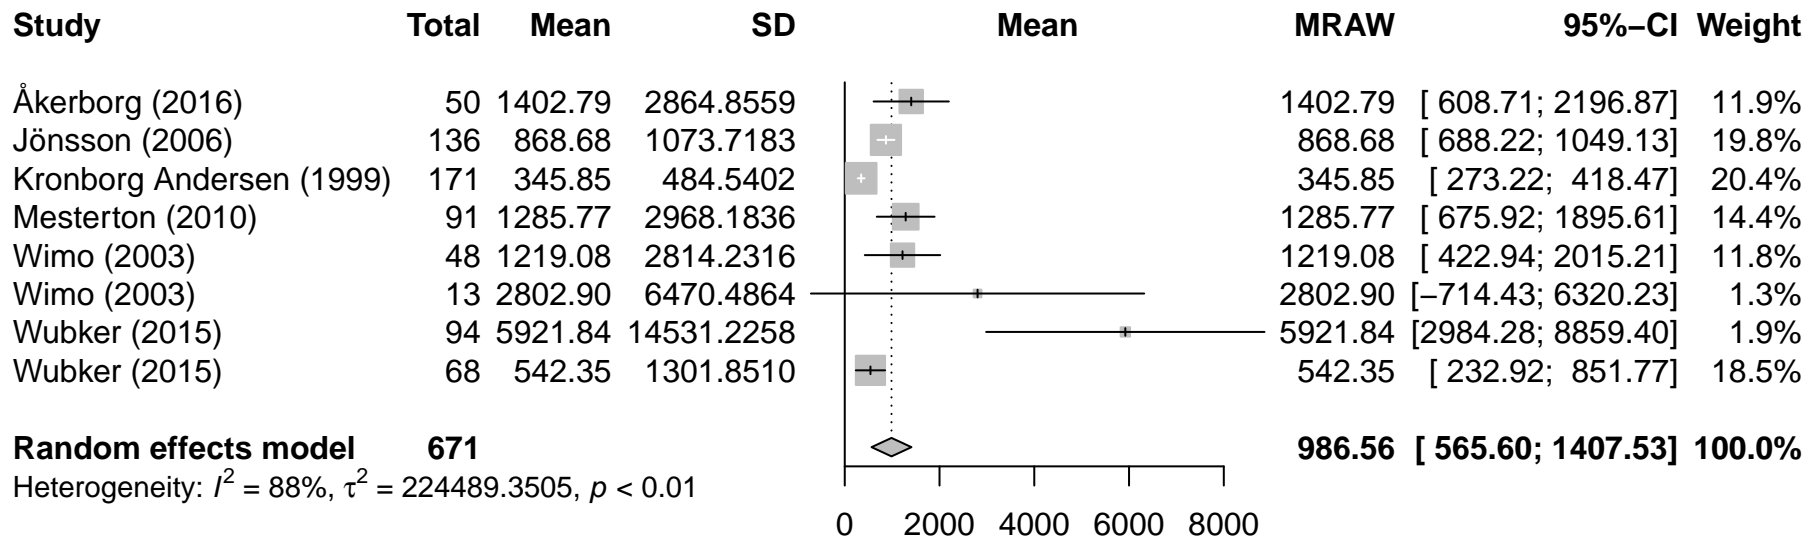

Nordics, All, Mild, Pharmaceuticals

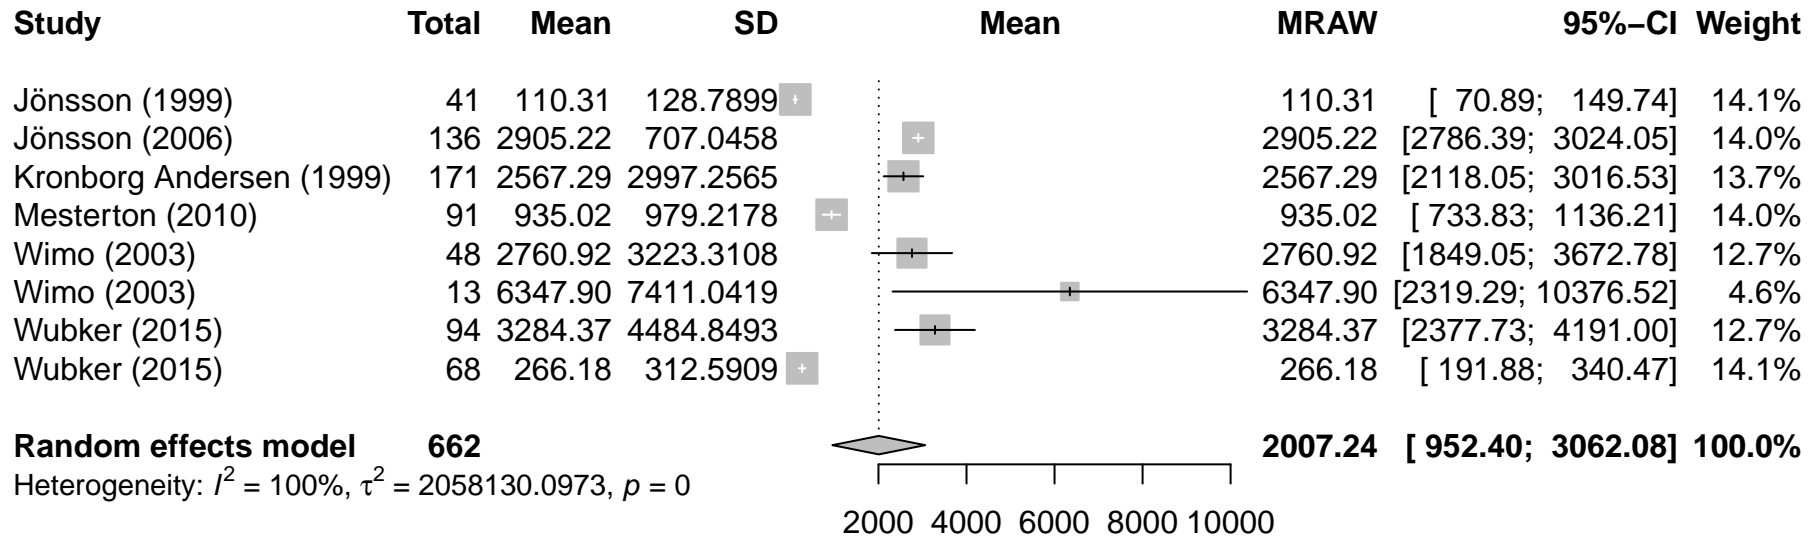

Nordics, All, Mild, Institutional care

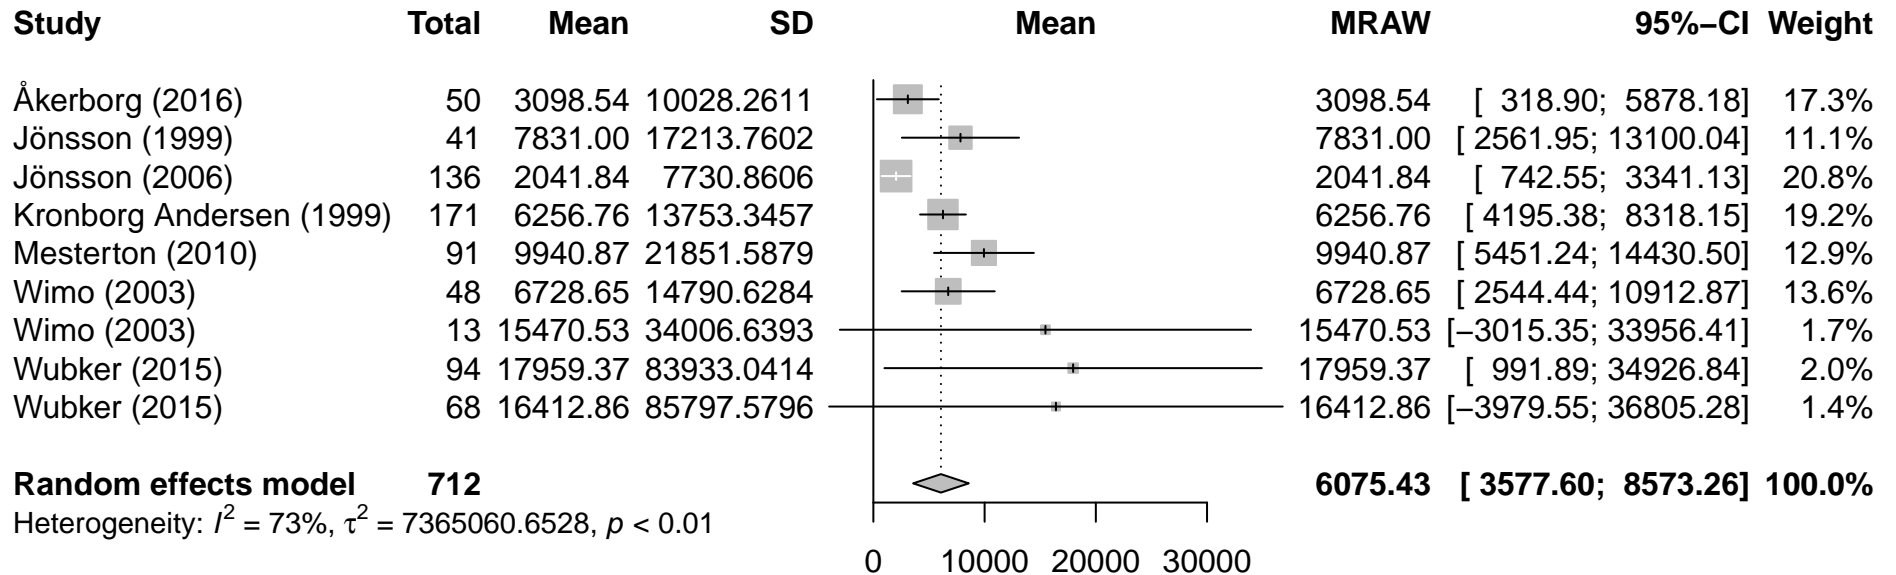



Nordics, All, Mild, Community care

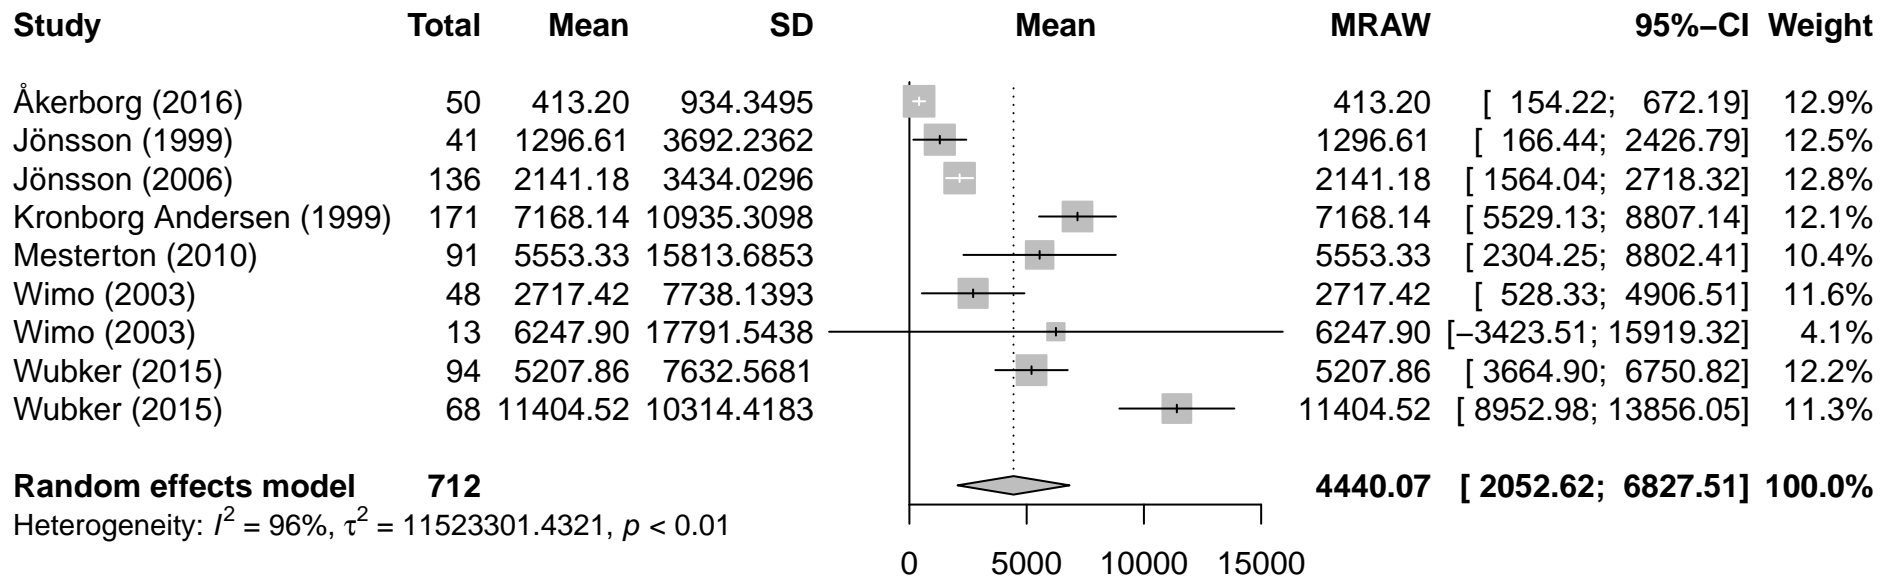

Nordics, All, Mild, Caregiver work loss

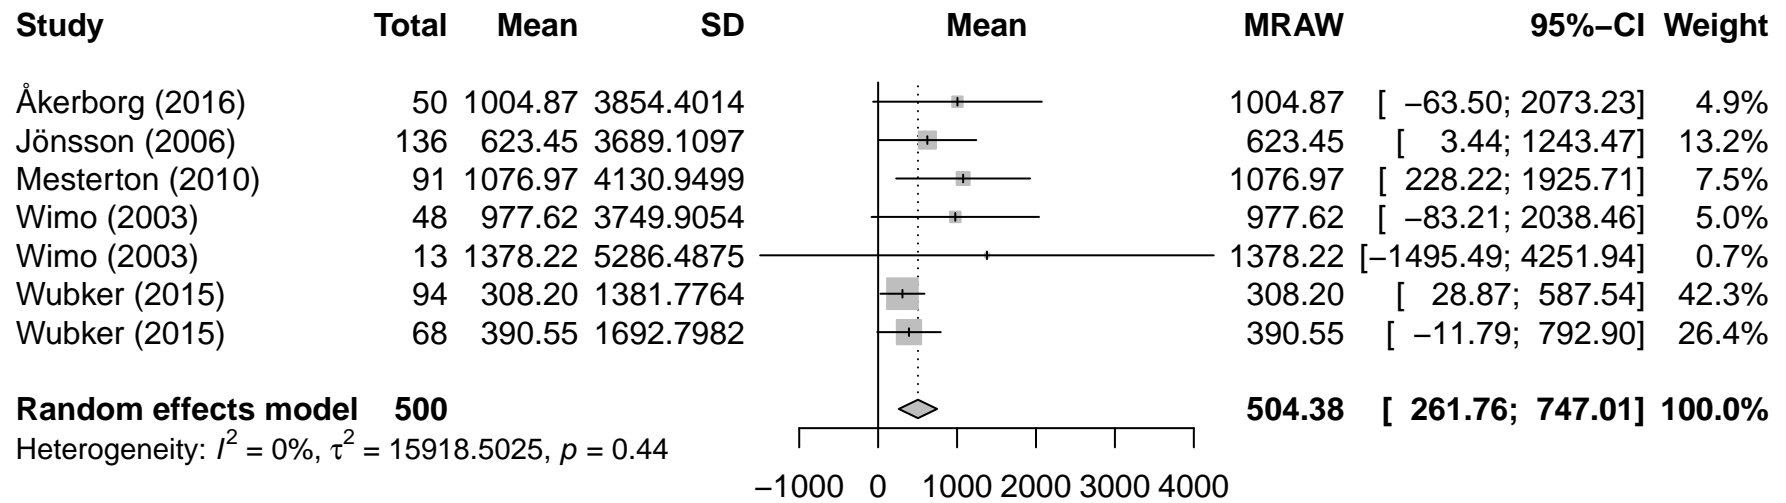

Nordics, All, Mild, Caregiver time

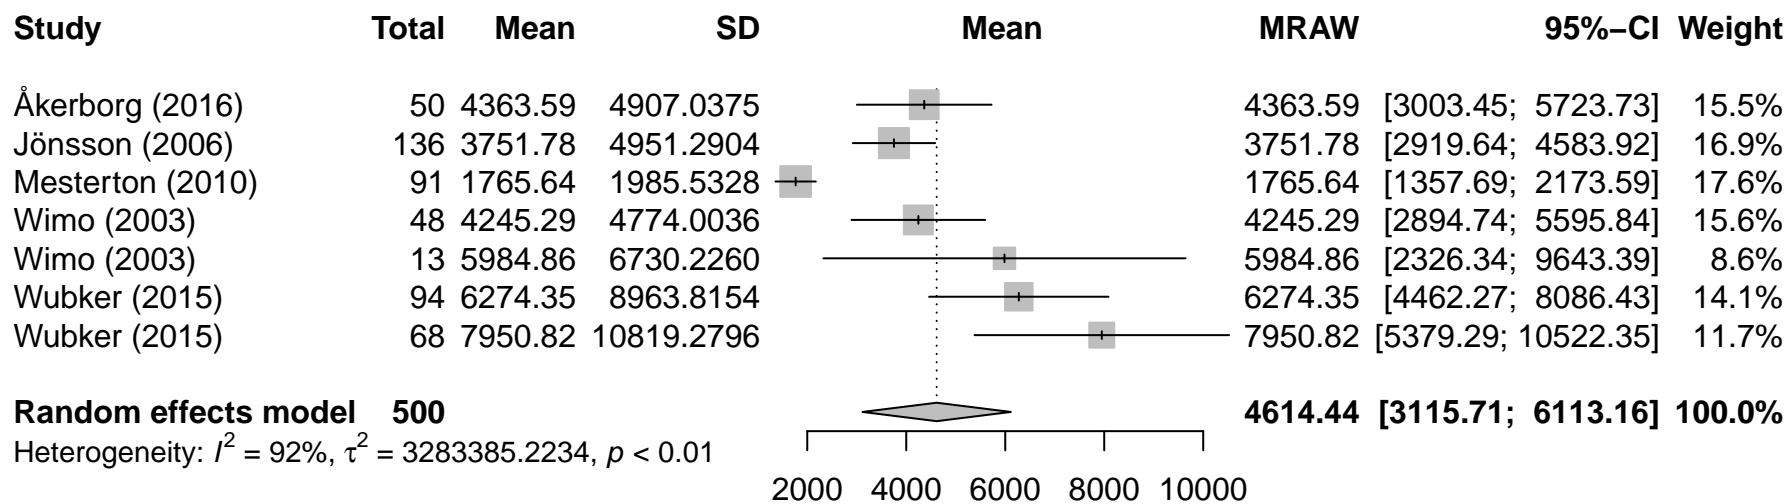

Nordics, All, Moderate, Inpatient care

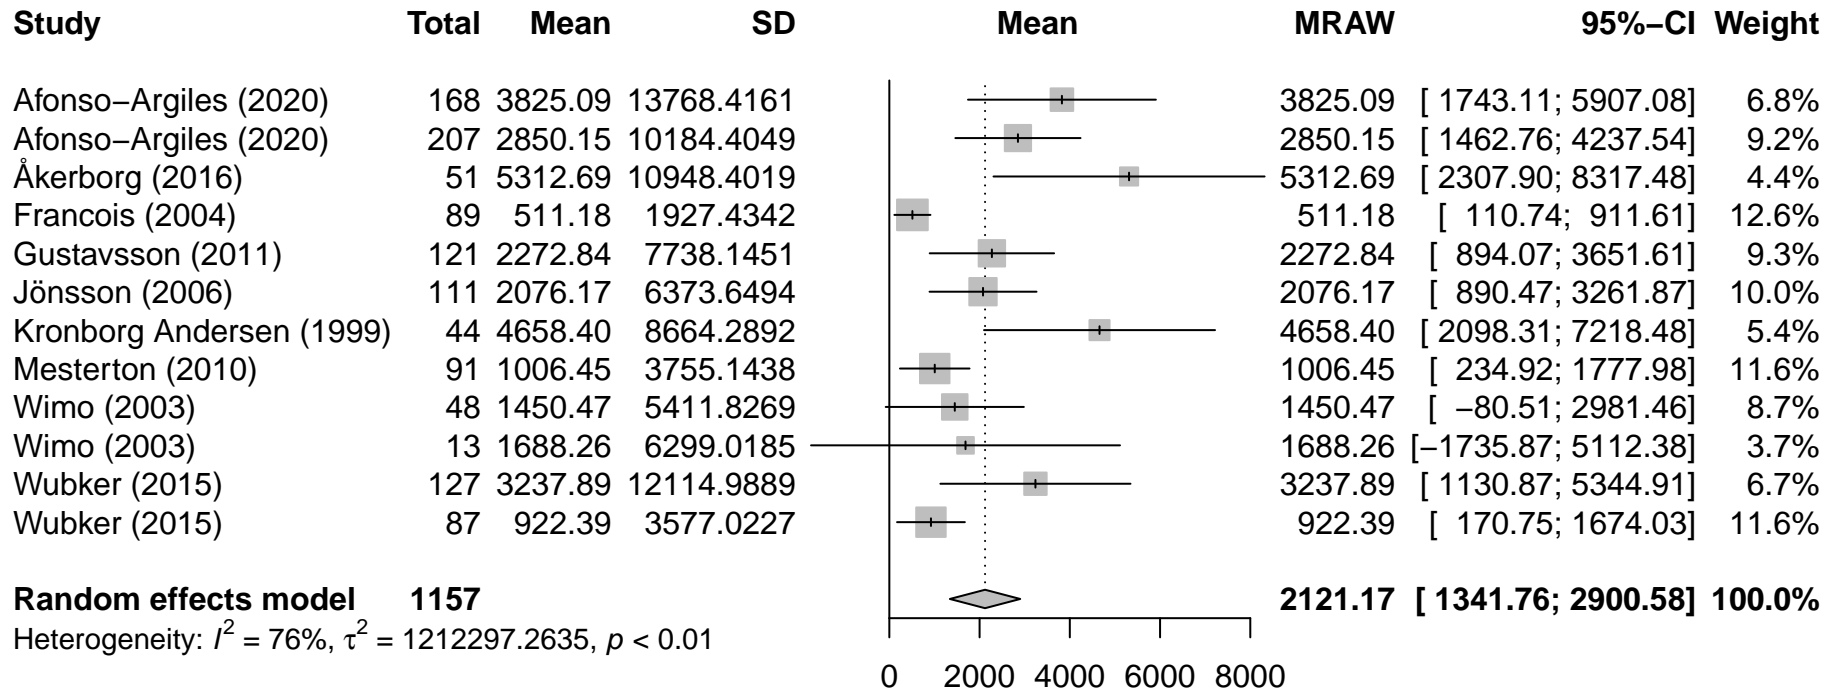

Nordics, All, Moderate, Outpatient care

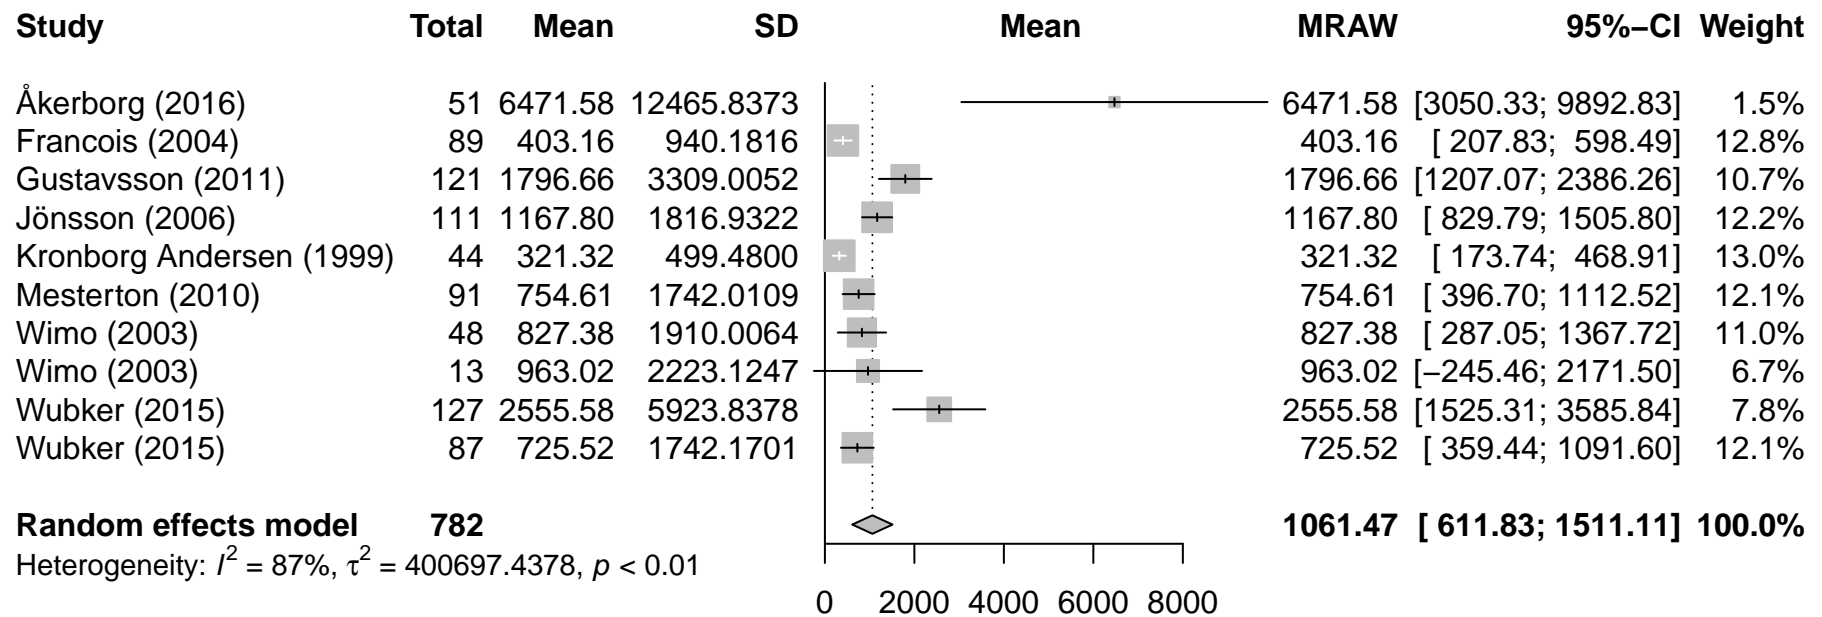

Nordics, All, Moderate, Pharmaceuticals

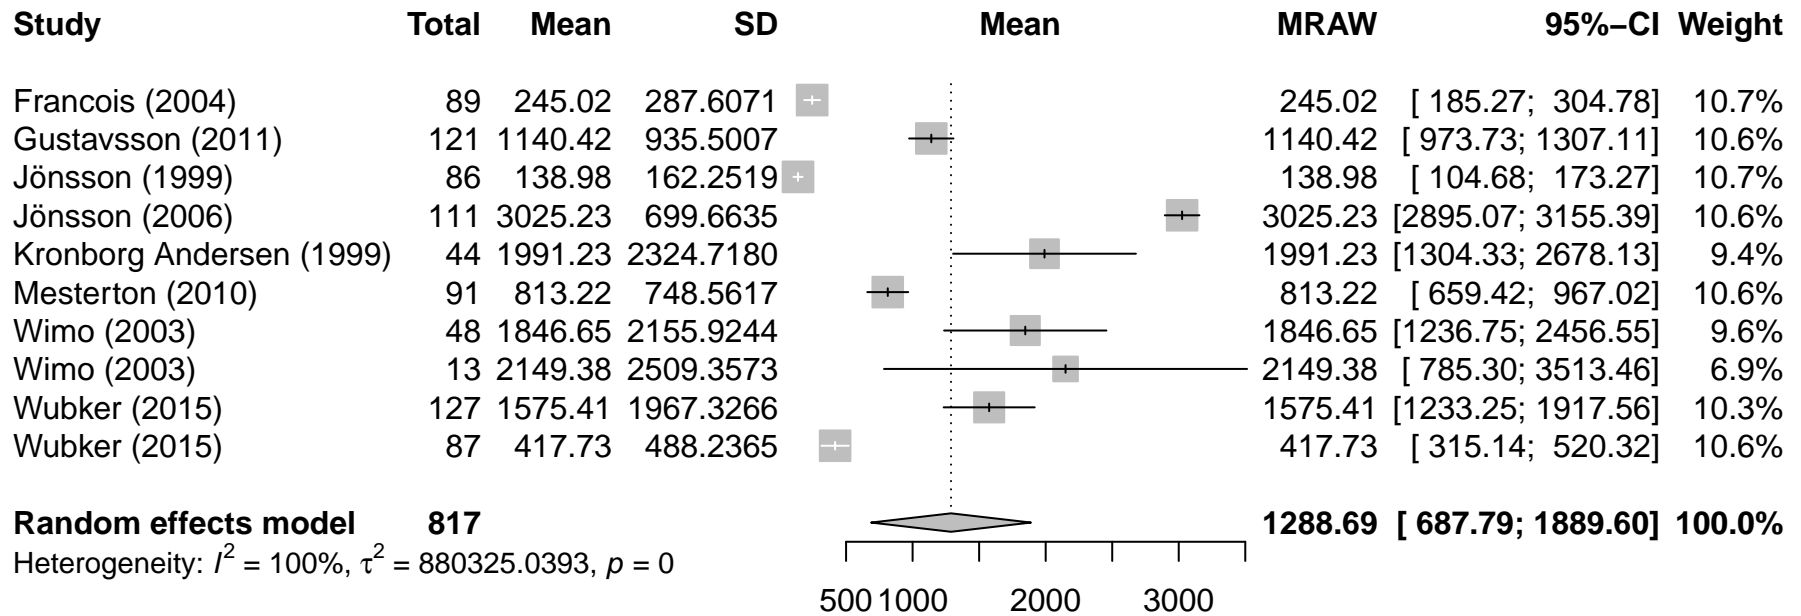

Nordics, All, Moderate, Institutional care

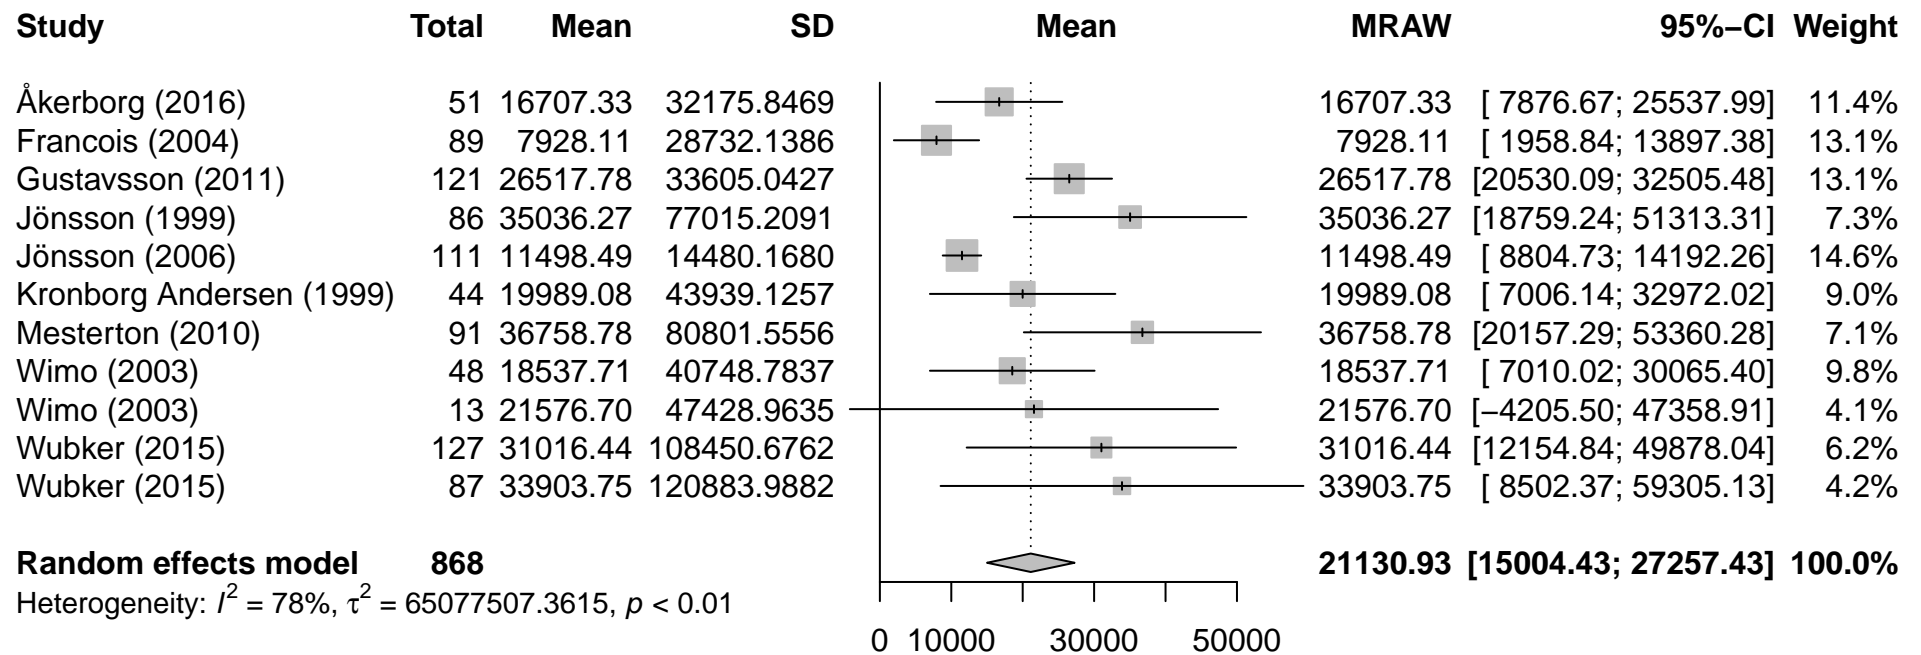

Nordics, All, Moderate, Community care

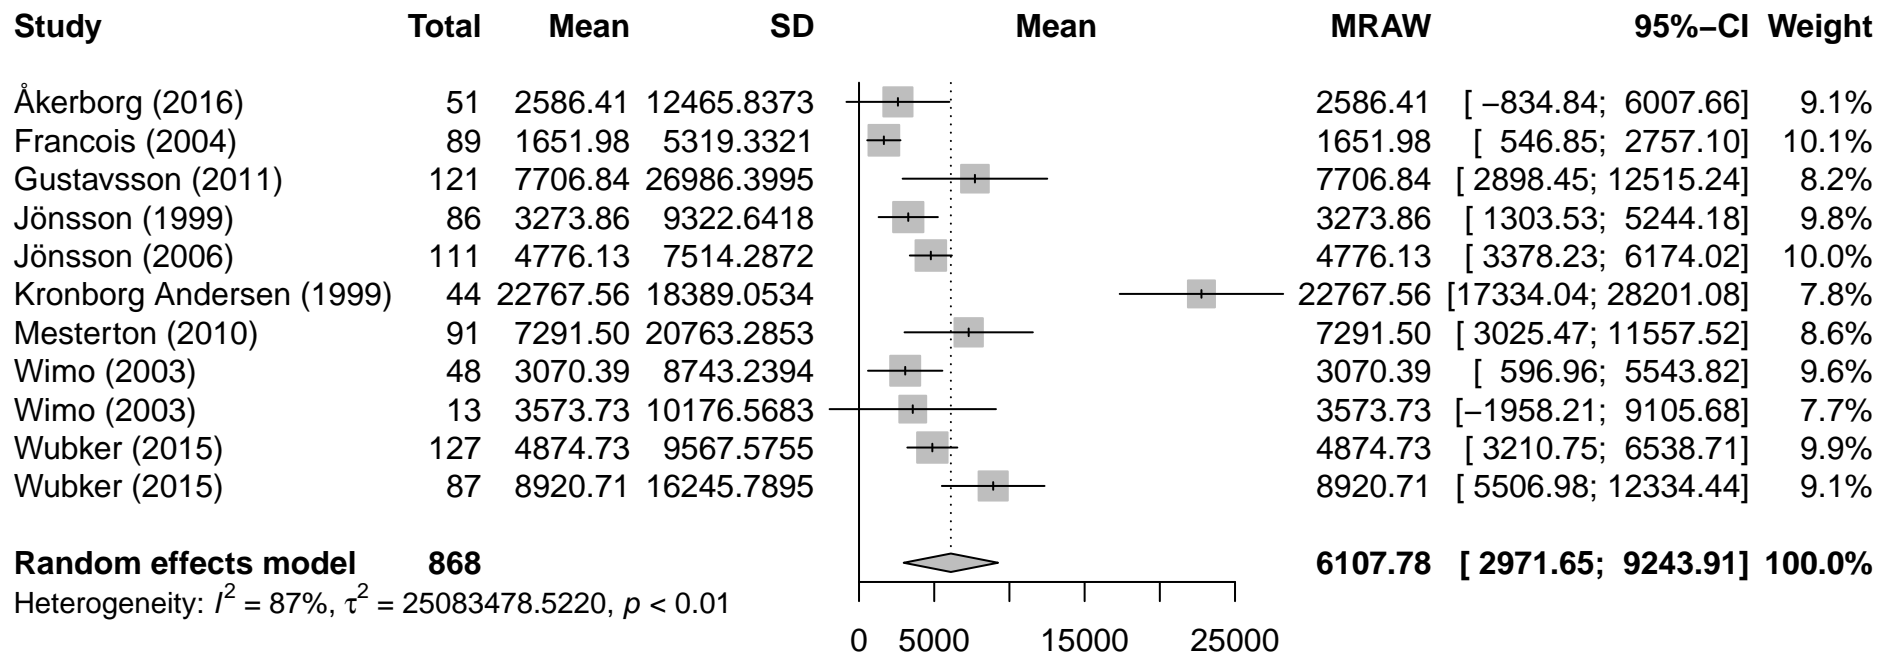



Nordics, All, Moderate, Caregiver work loss

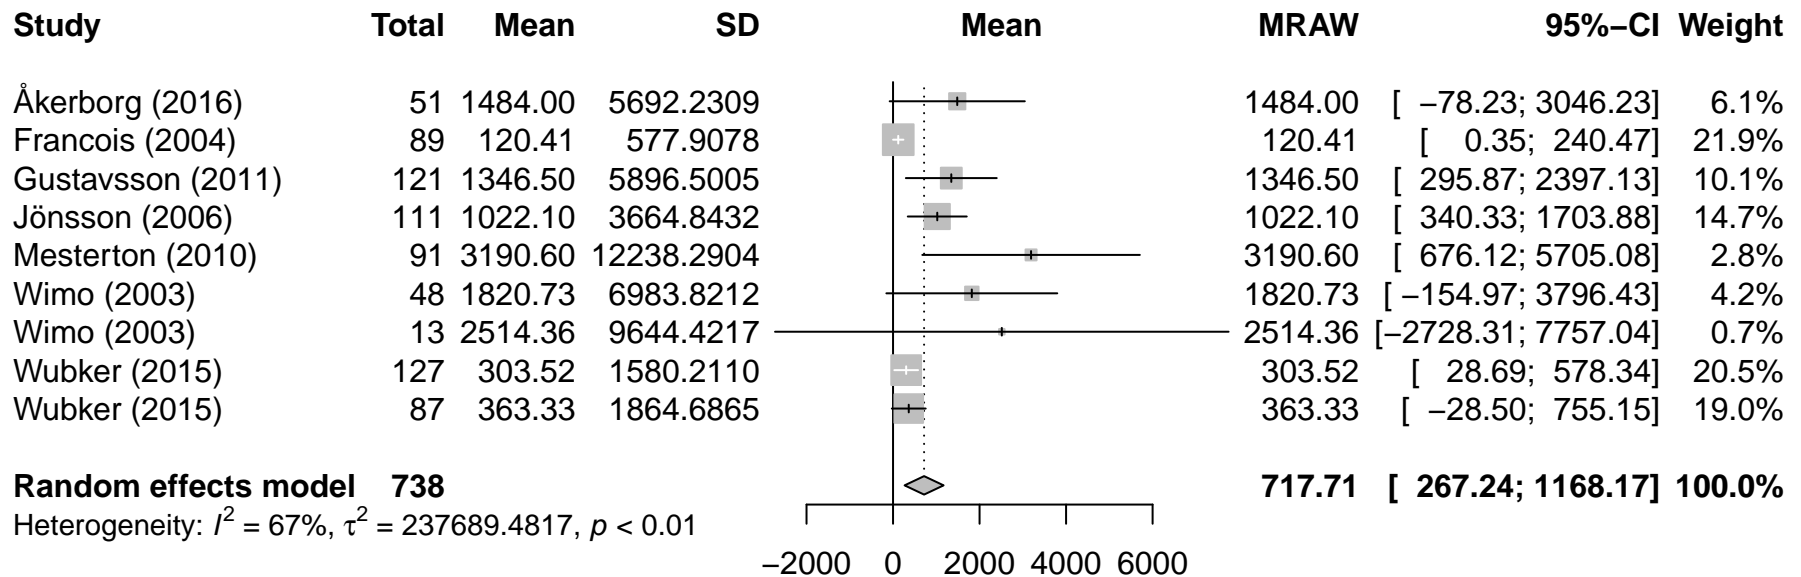

Nordics, All, Moderate, Caregiver time

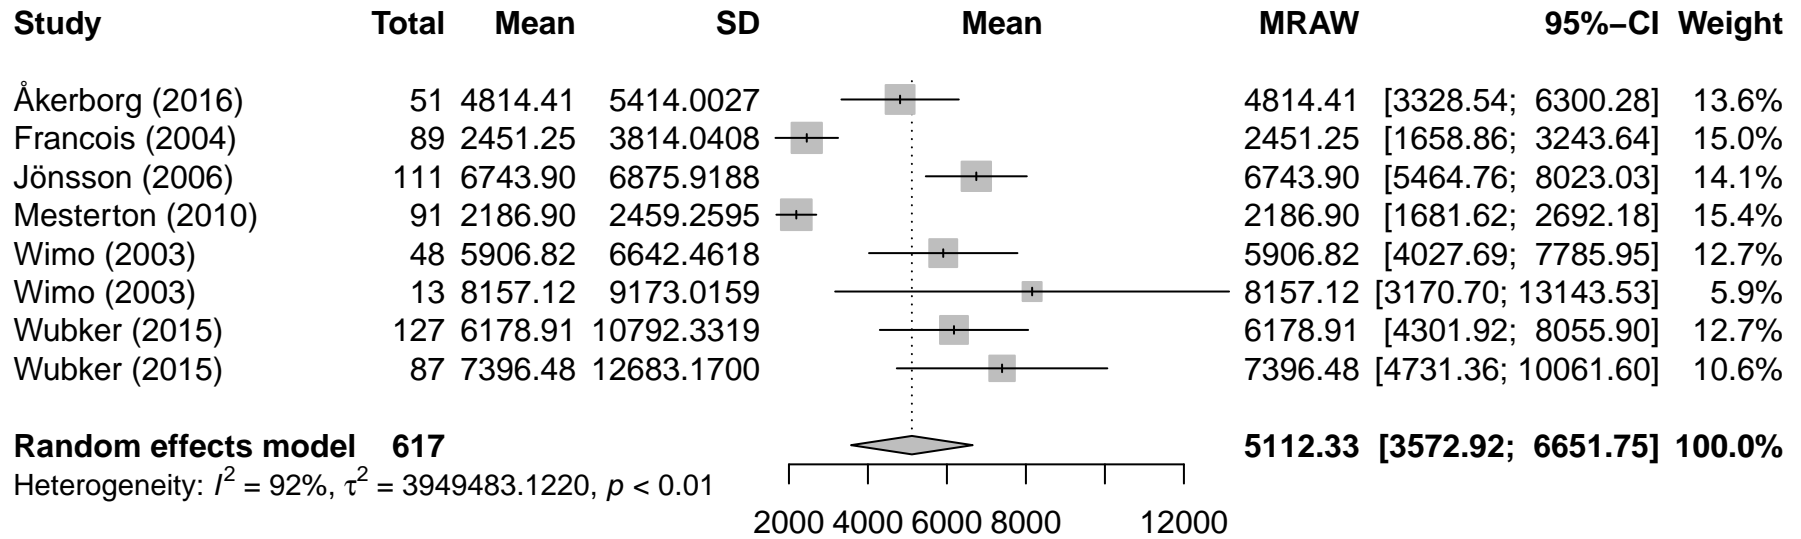

Nordics, All, Severe, Inpatient care

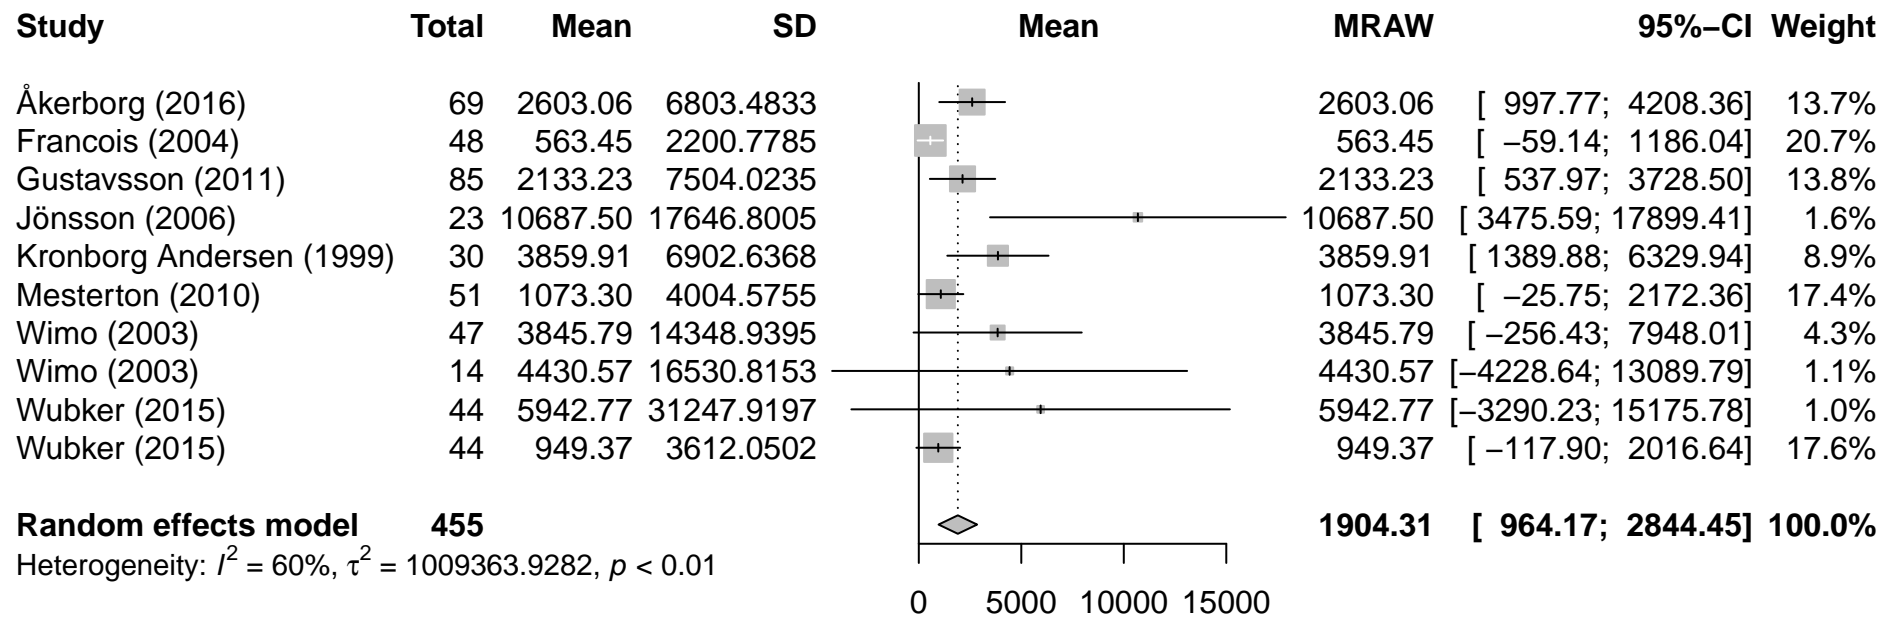

Nordics, All, Severe, Outpatient care

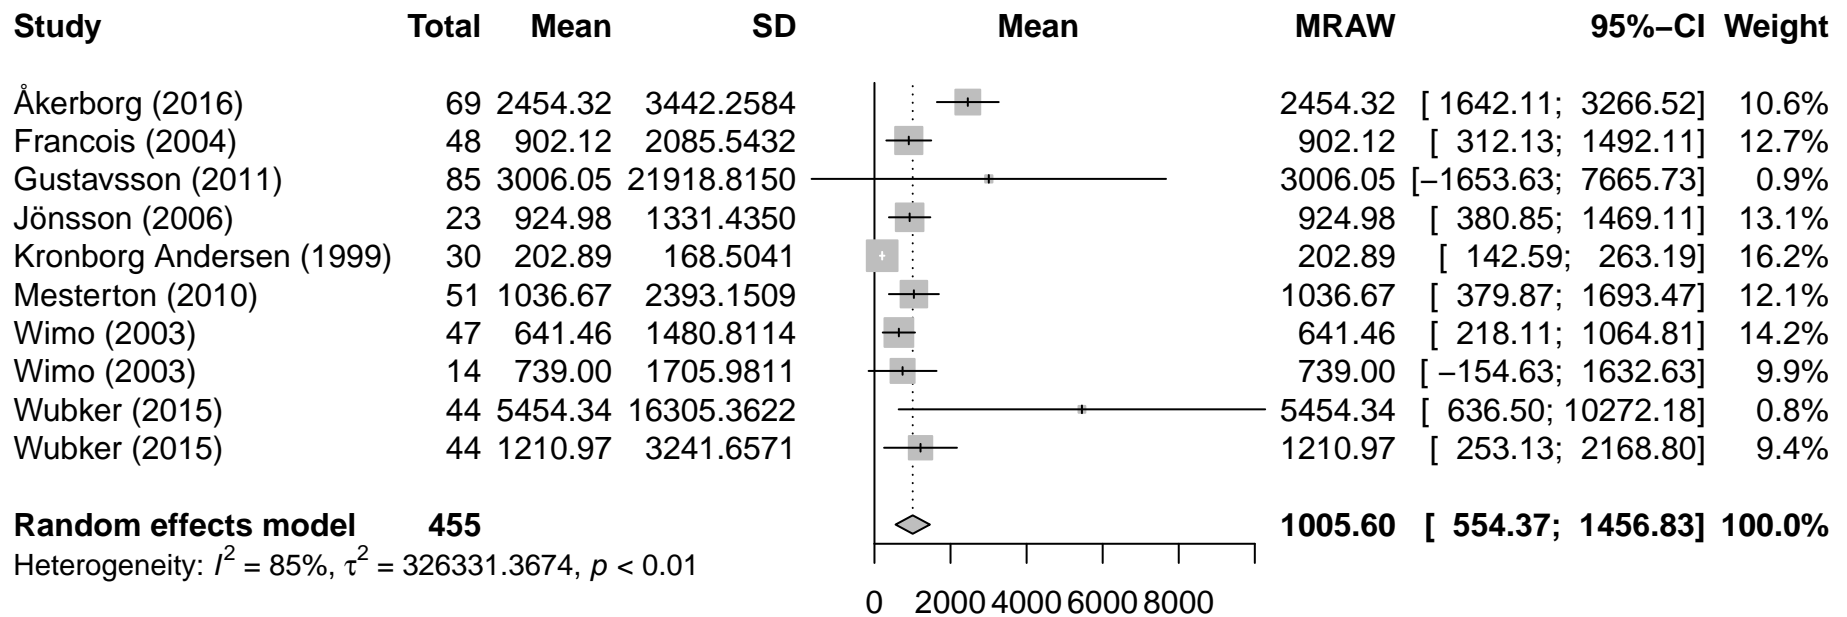

Nordics, All, Severe, Pharmaceuticals

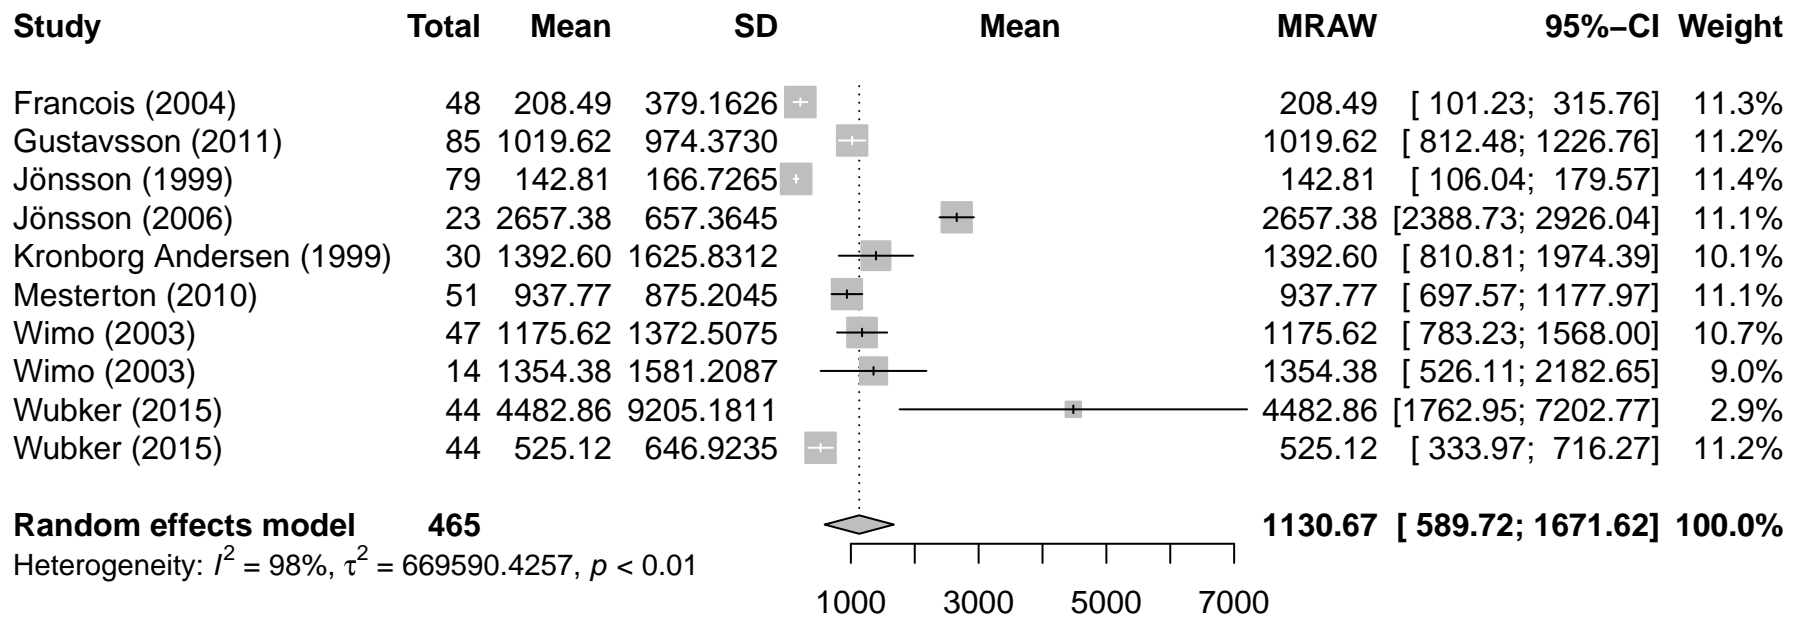

Nordics, All, Severe, Institutional care

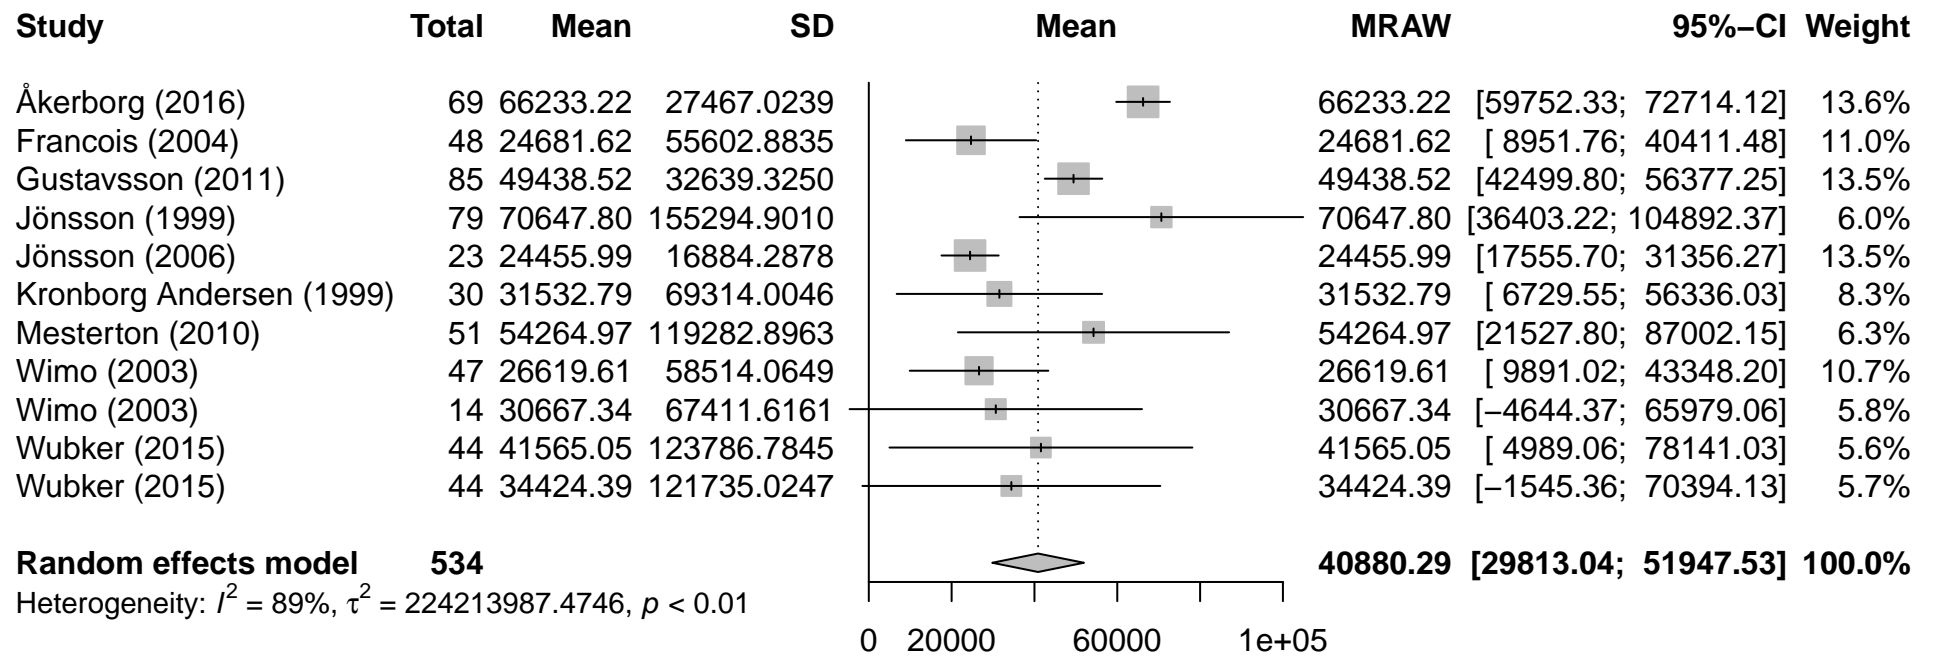

Nordics, All, Severe, Community care

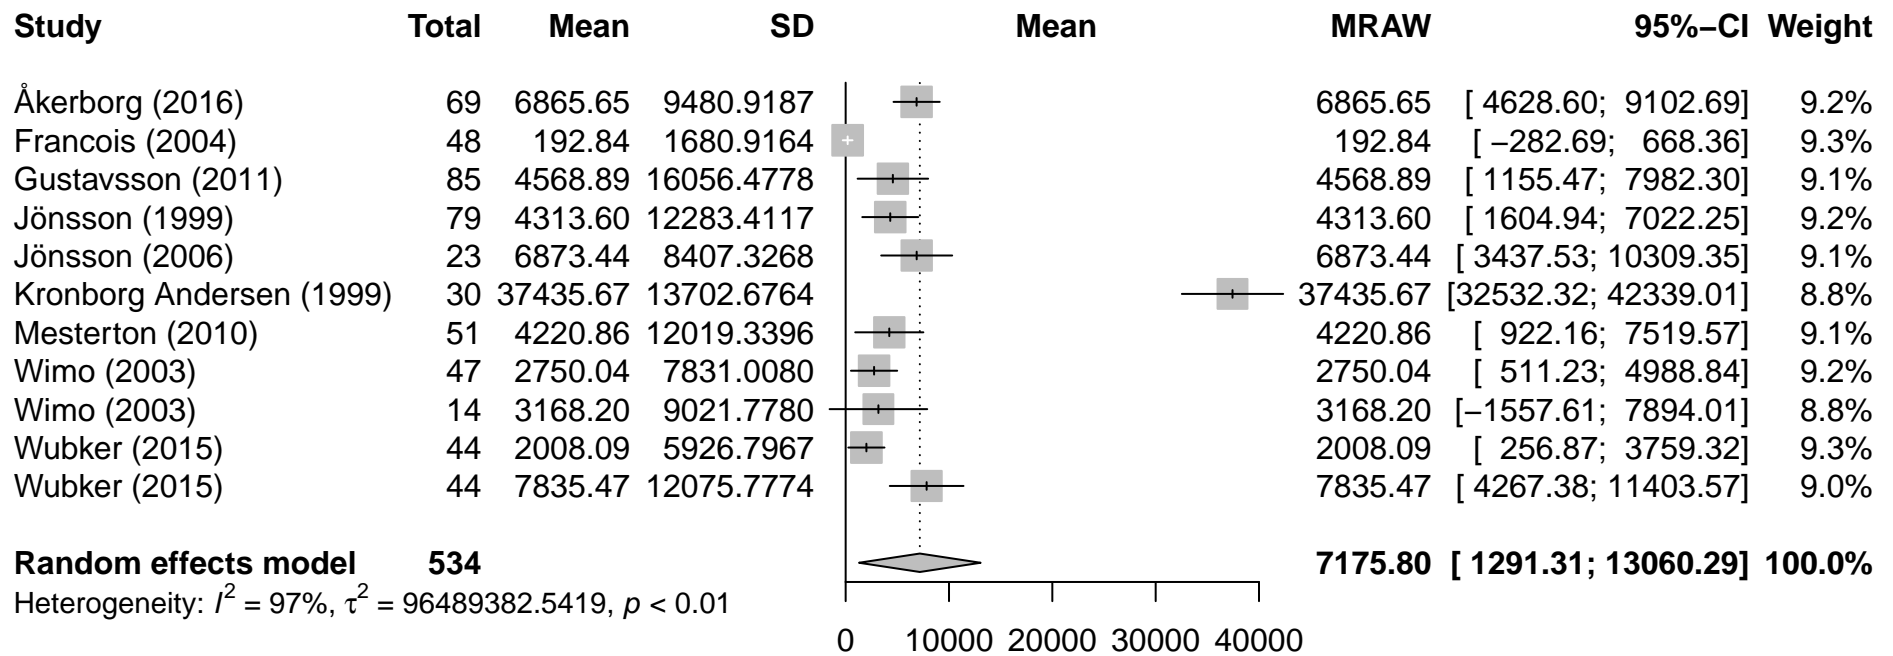

Nordics, All, Severe, Caregiver work loss

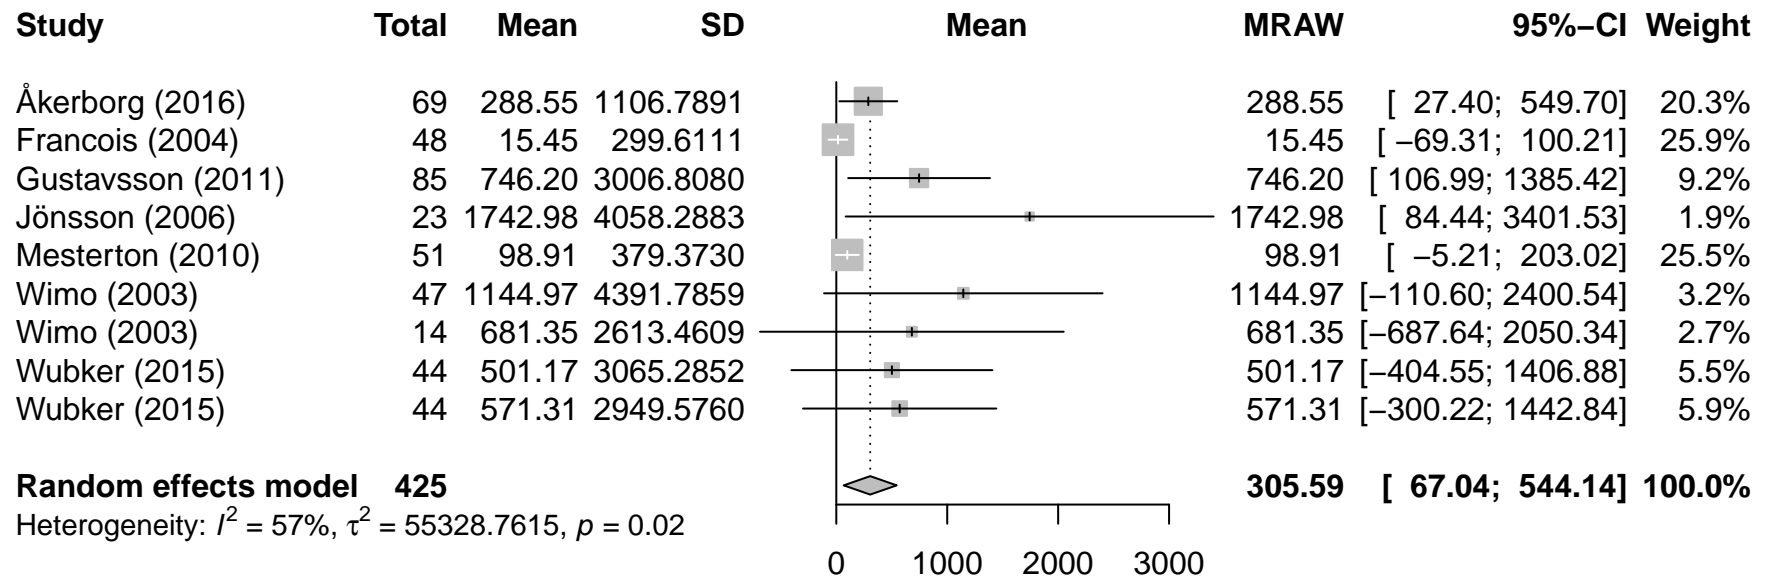



Nordics, All, Severe, Caregiver time

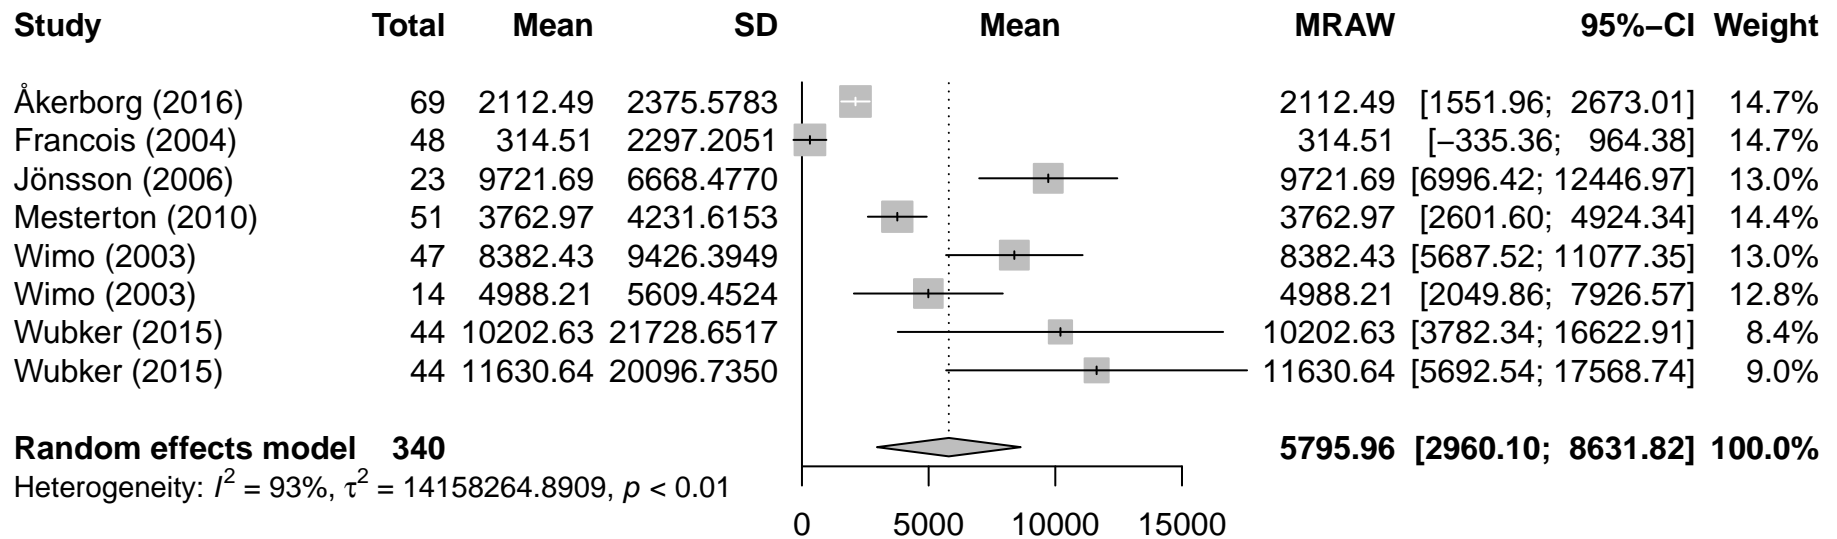

Nordics, All, All, Inpatient care

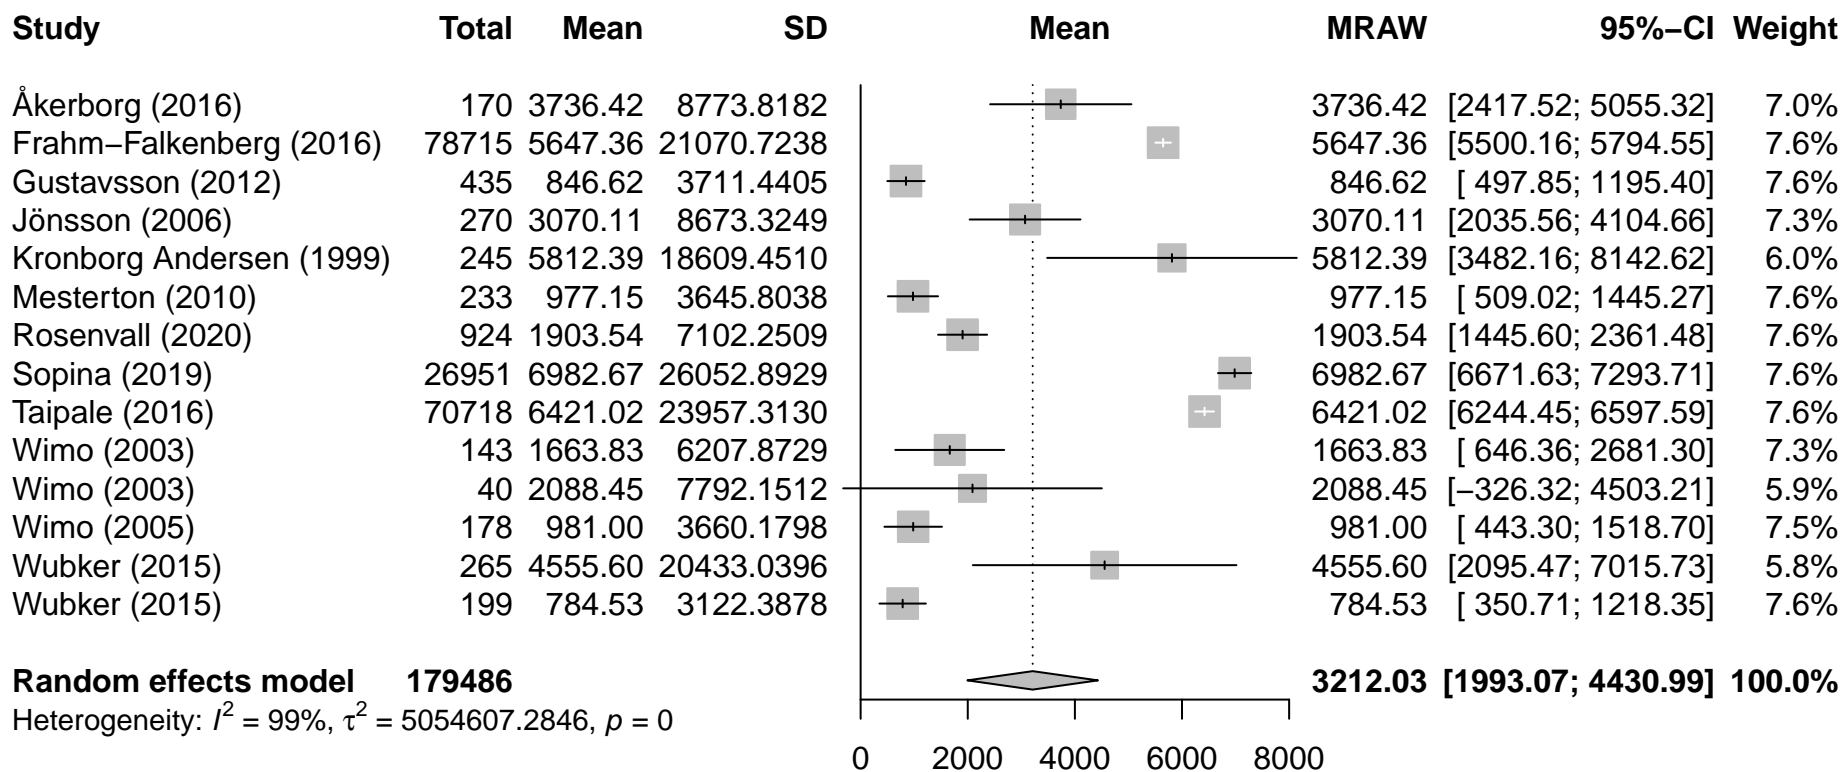

Nordics, All, All, Outpatient care

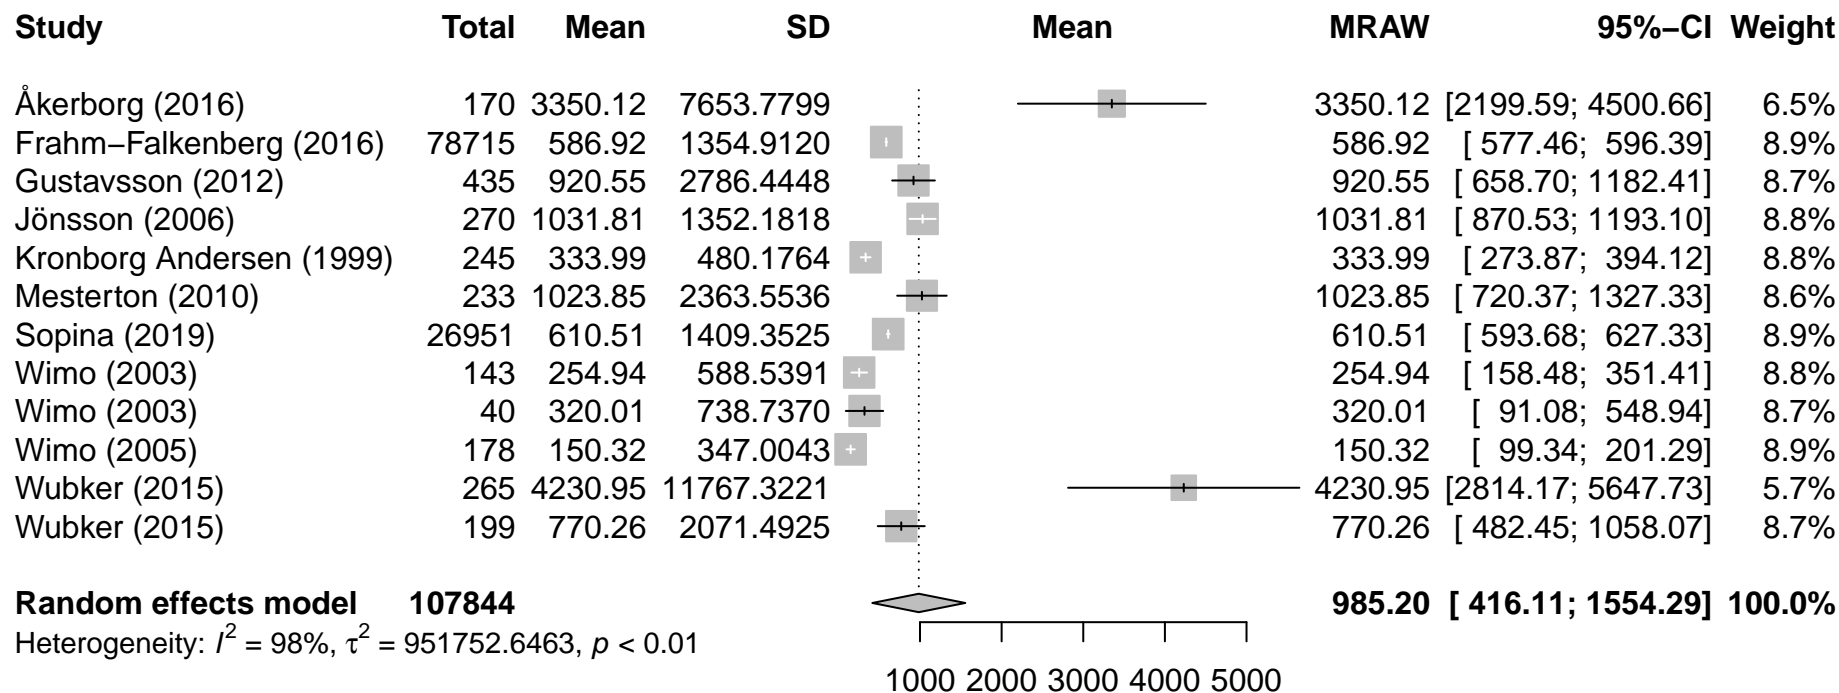

Nordics, All, All, Pharmaceuticals

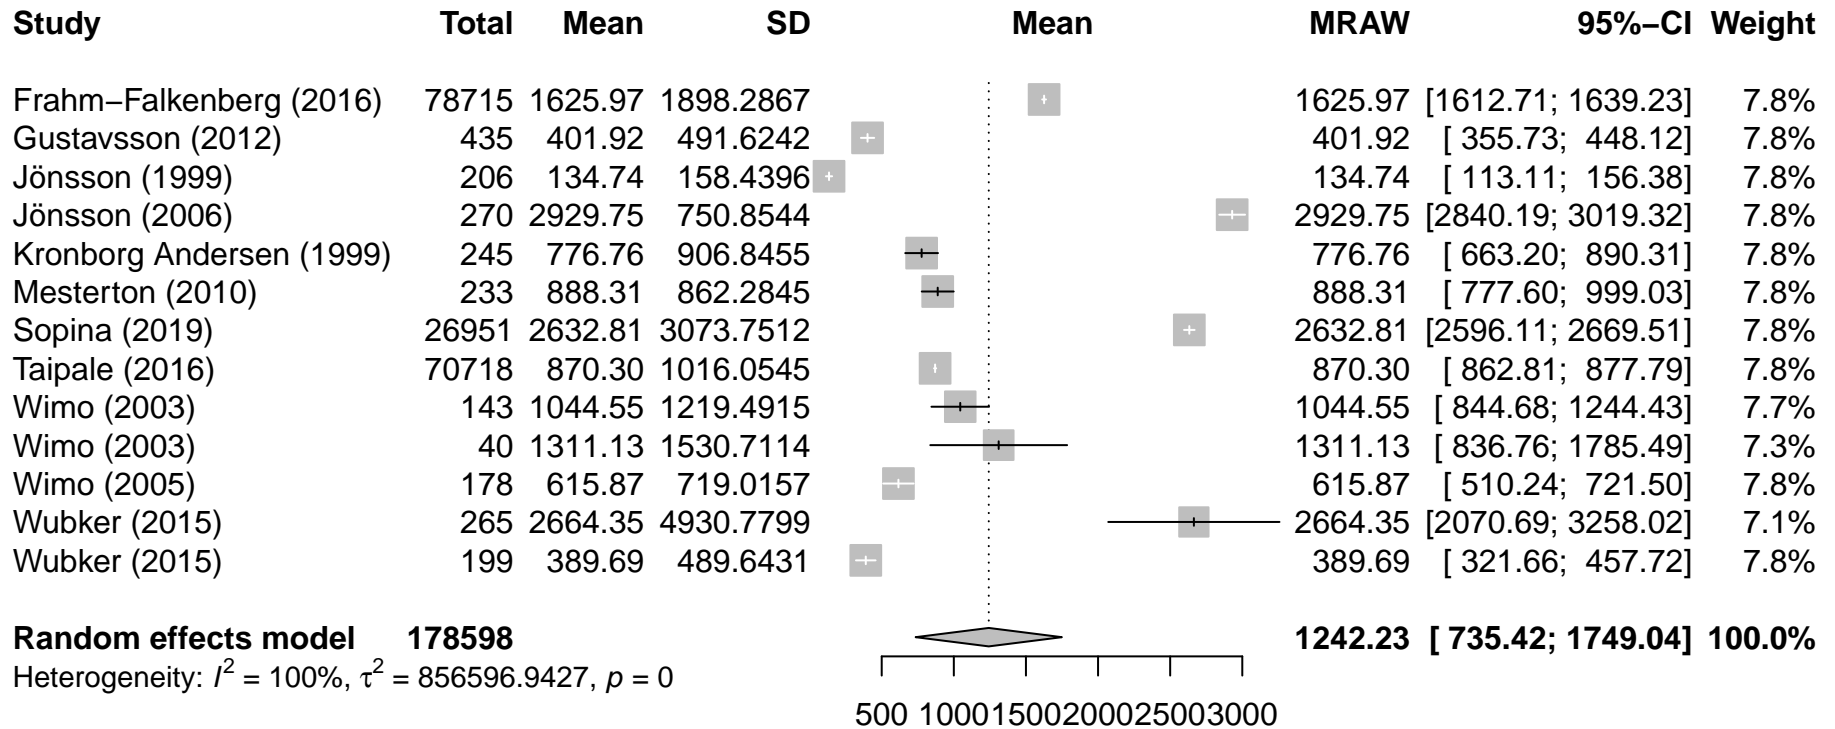

Nordics, All, All, Institutional care

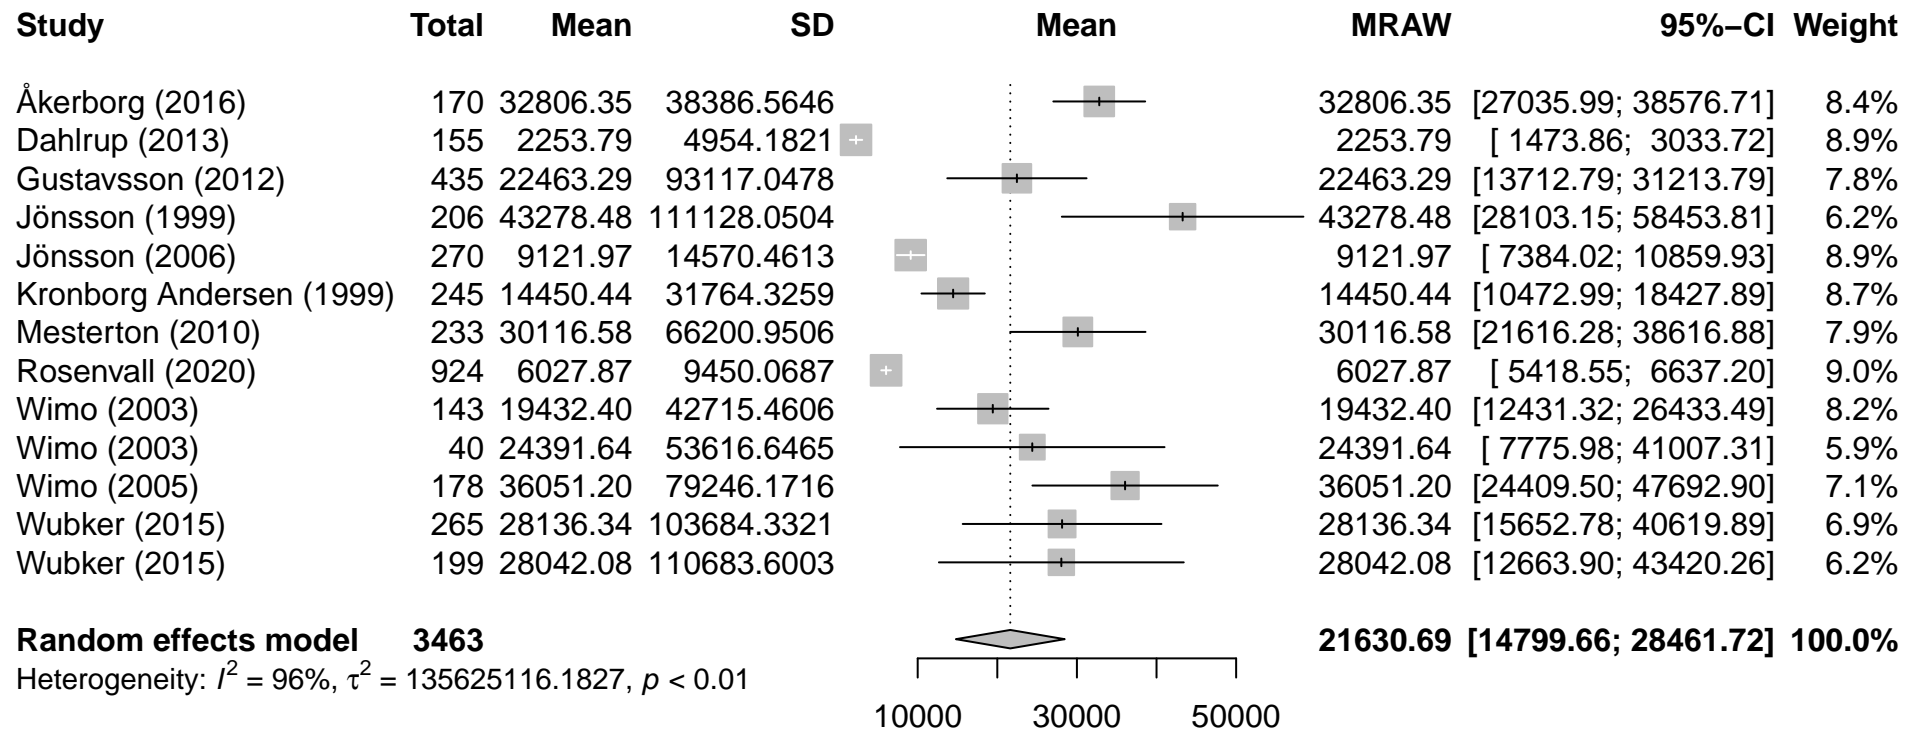

Nordics, All, All, Community care

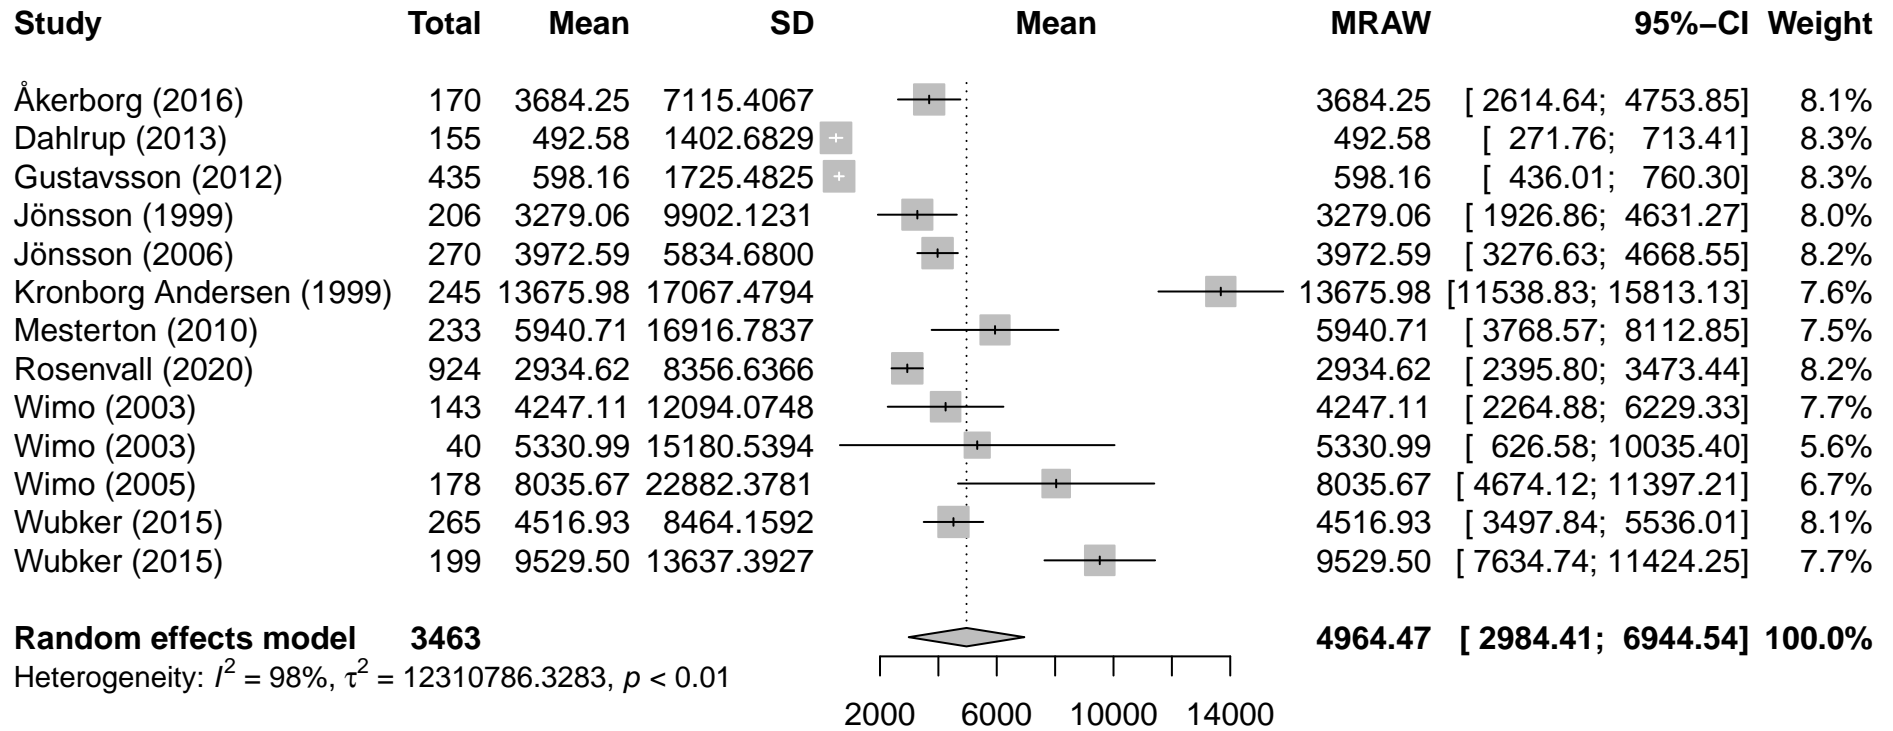

Nordics, All, All, Caregiver work loss

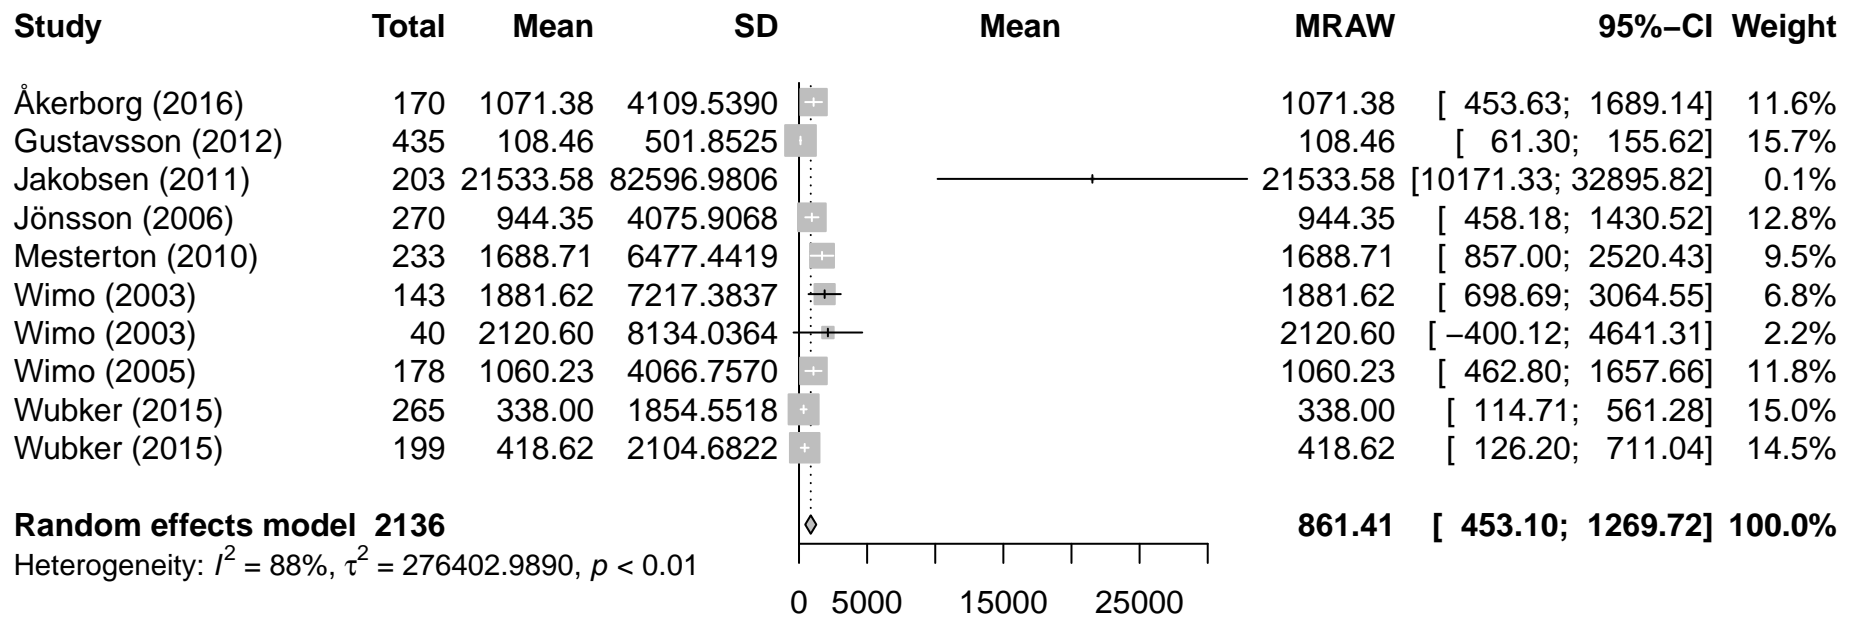

Nordics, All, All, Caregiver time

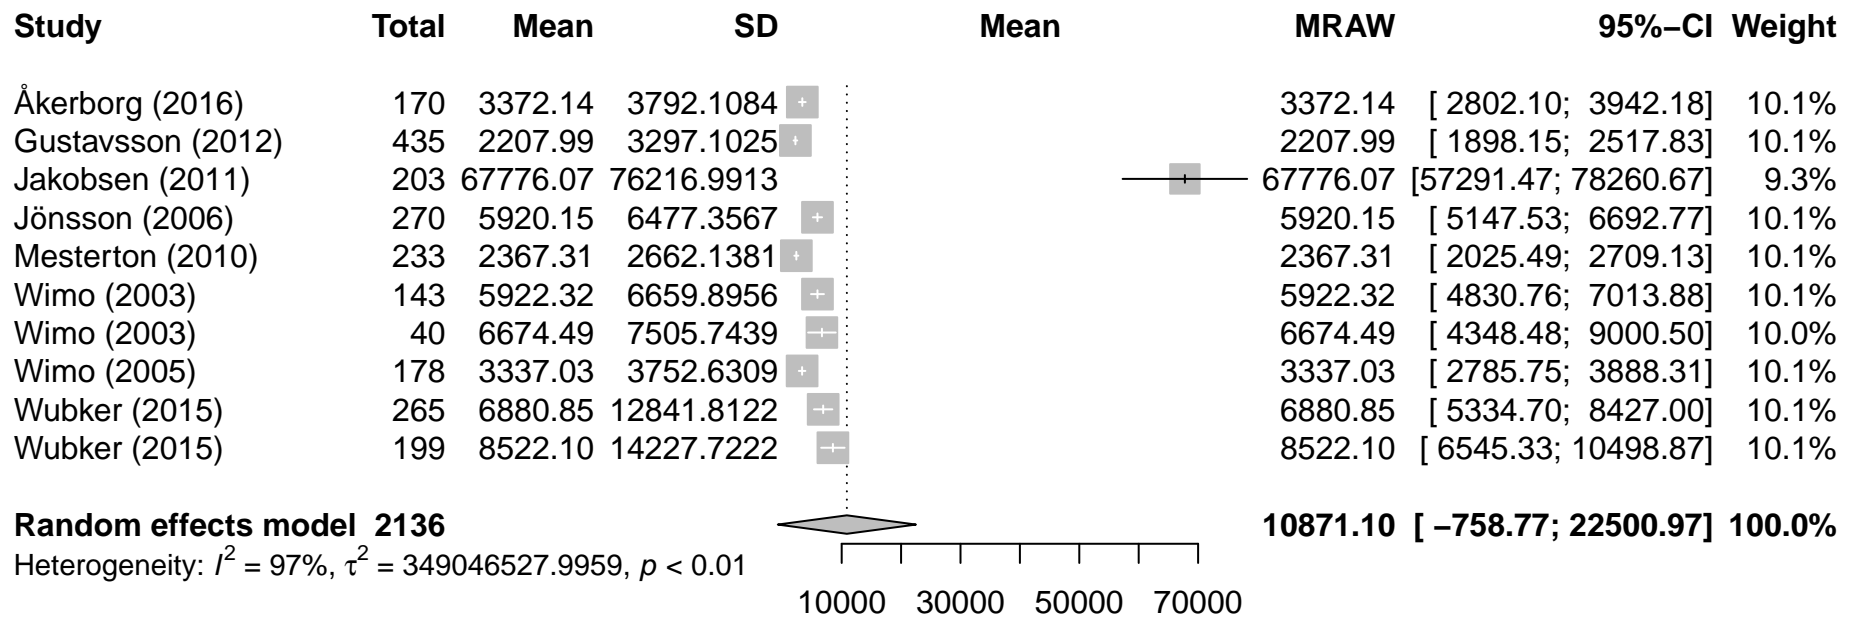



Western Europe, Community, Mild, Inpatient care

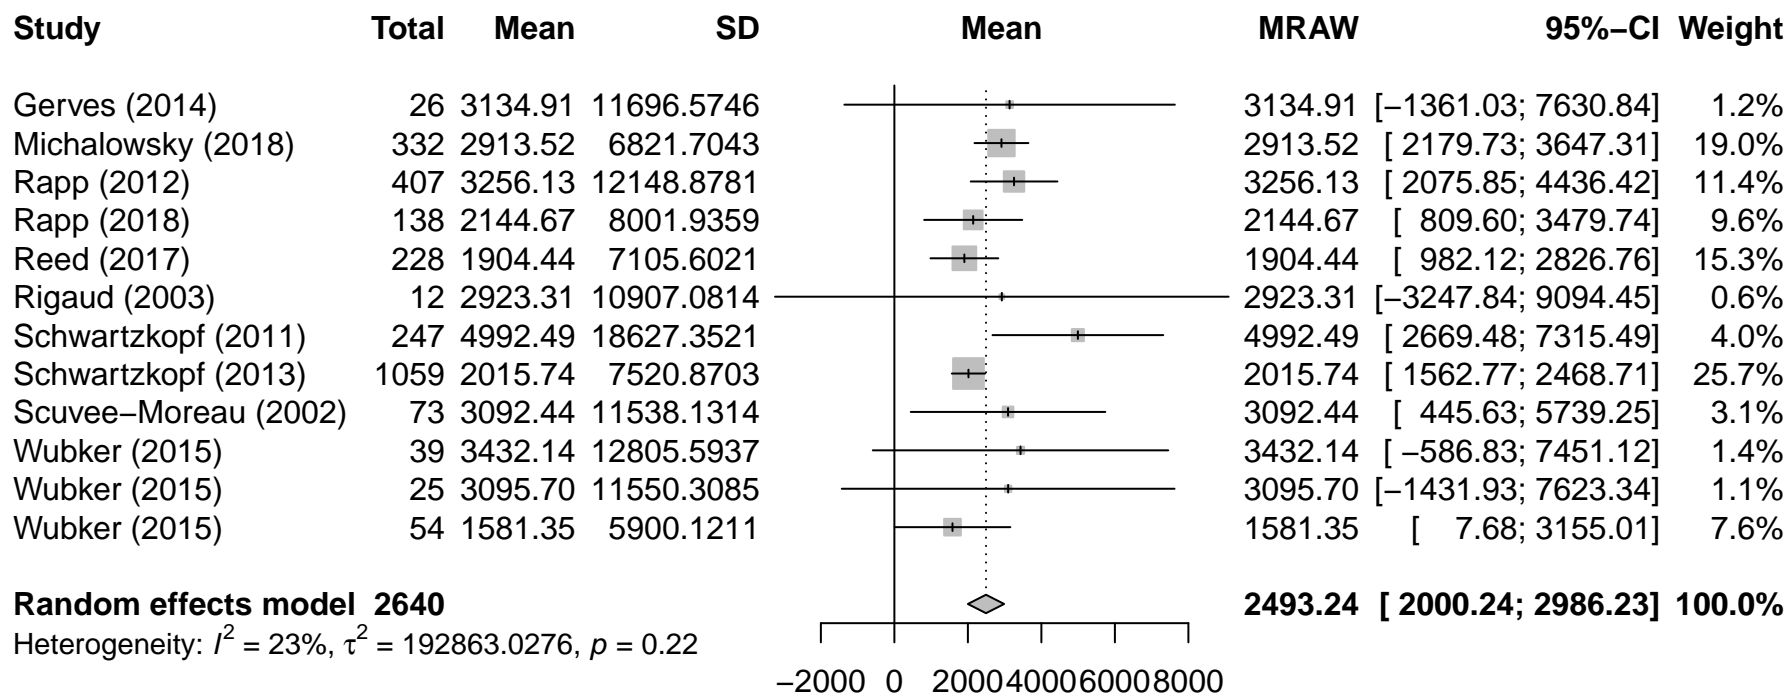

Western Europe, Community, Mild, Outpatient care

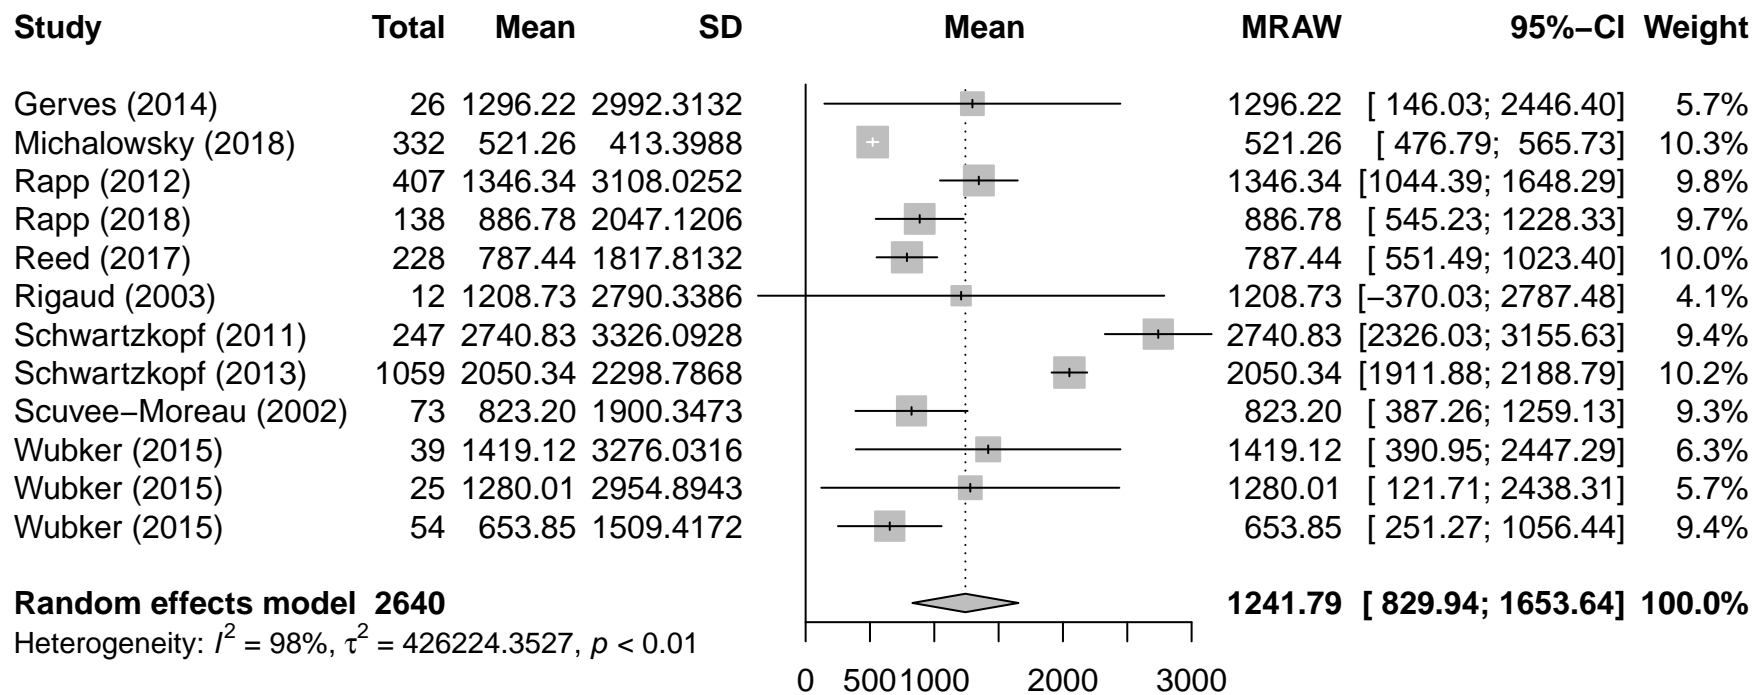

Western Europe, Community, Mild, Pharmaceuticals

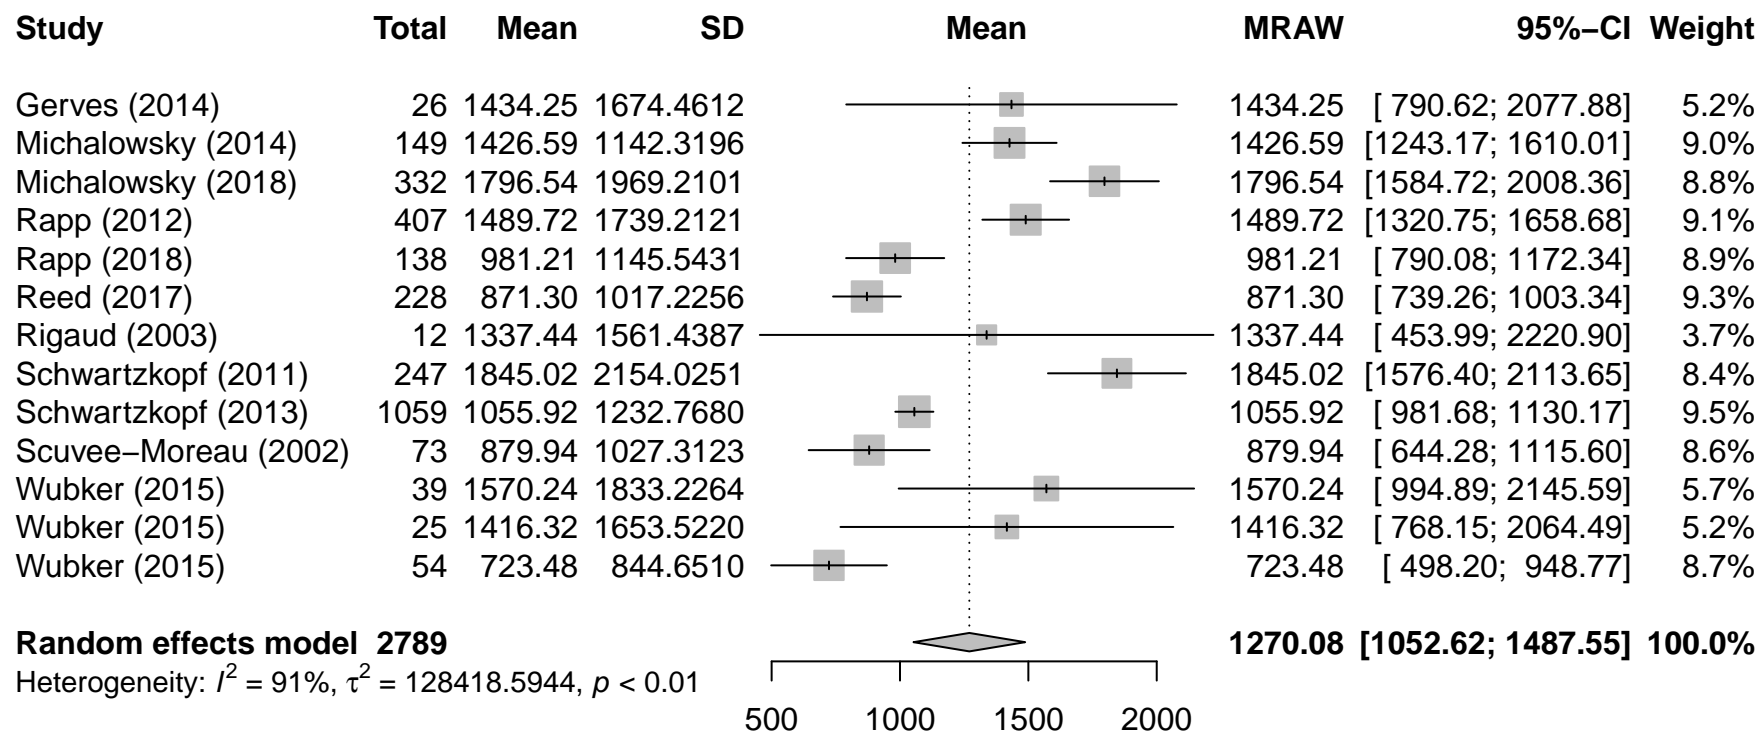

Western Europe, Community, Mild, Institutional care

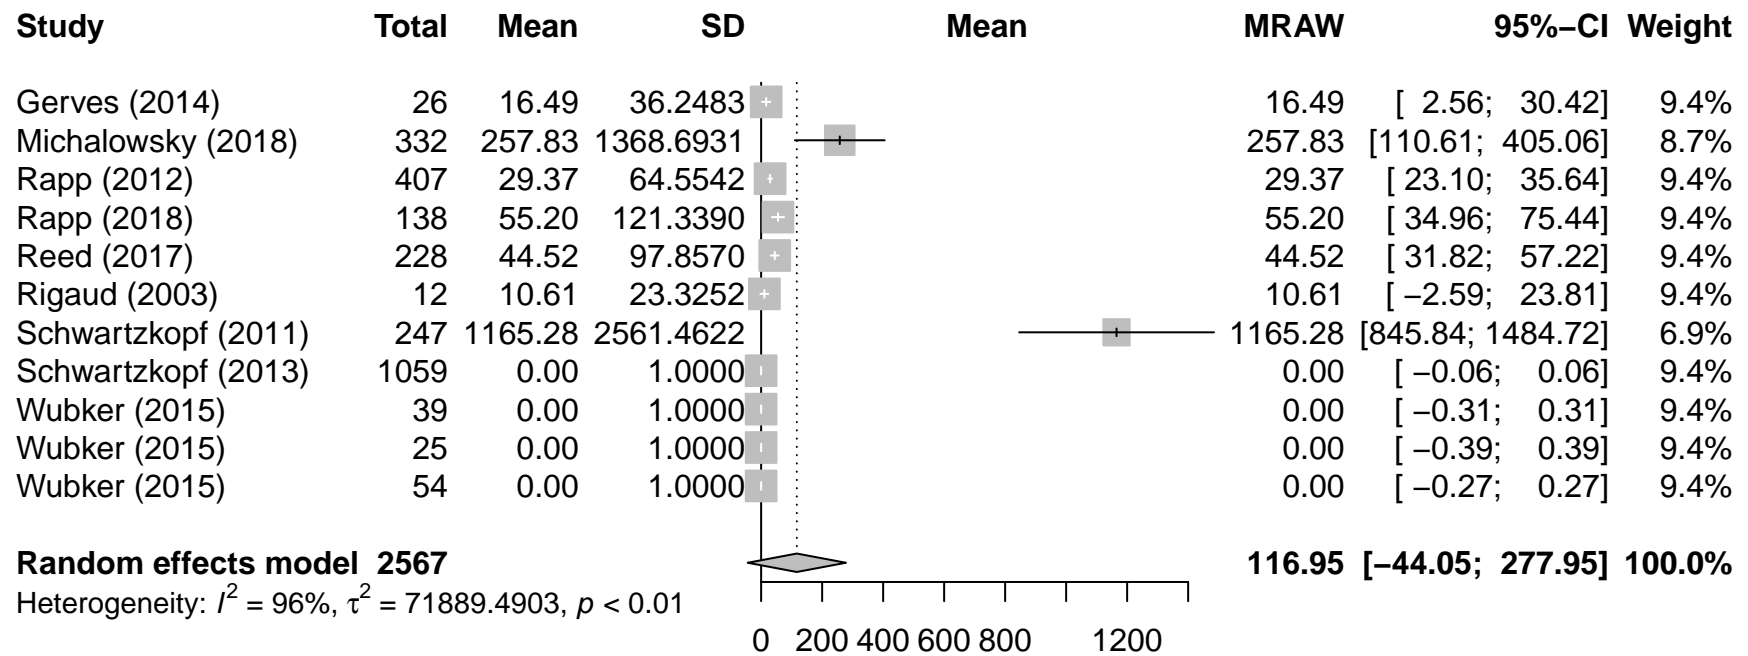

Western Europe, Community, Mild, Community care

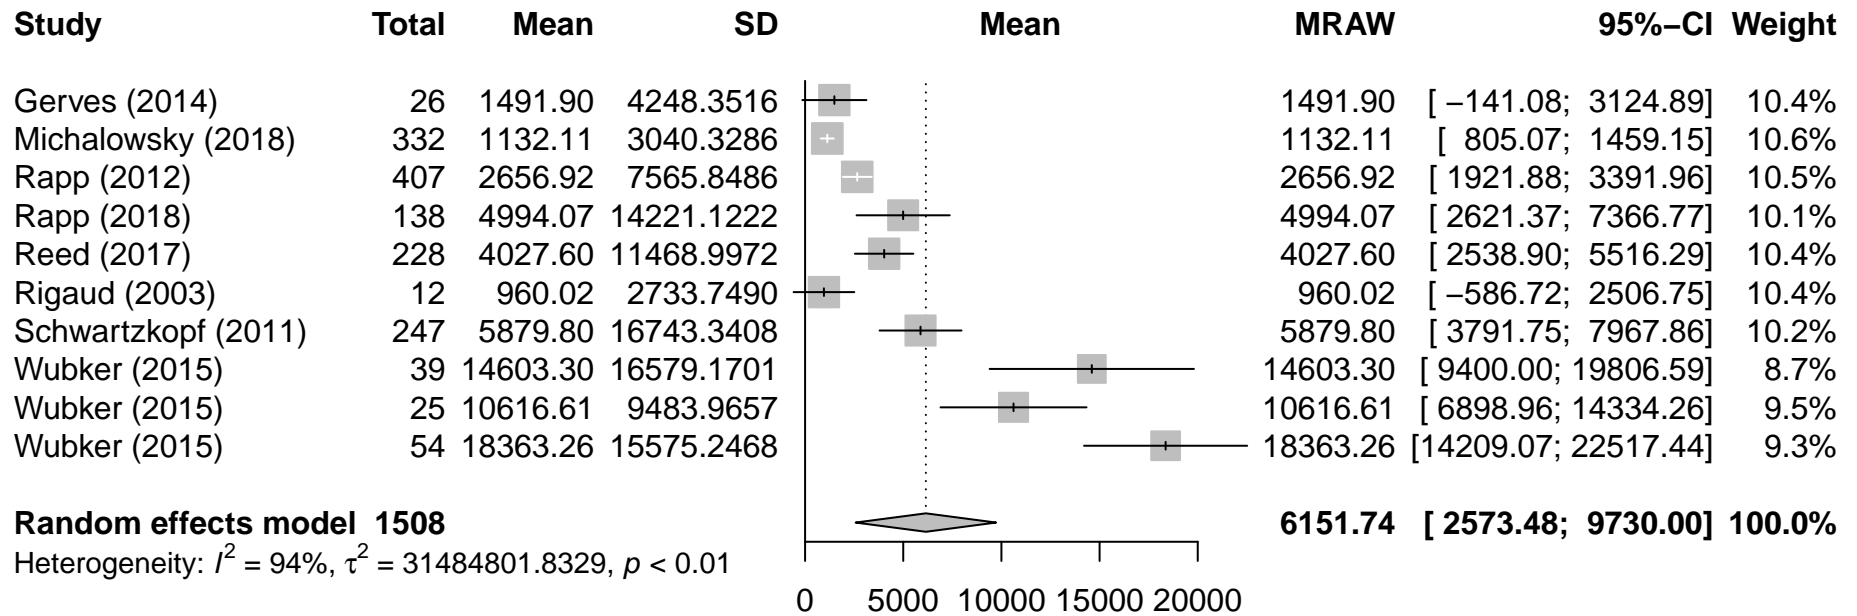

Western Europe, Community, Mild, Caregiver work loss

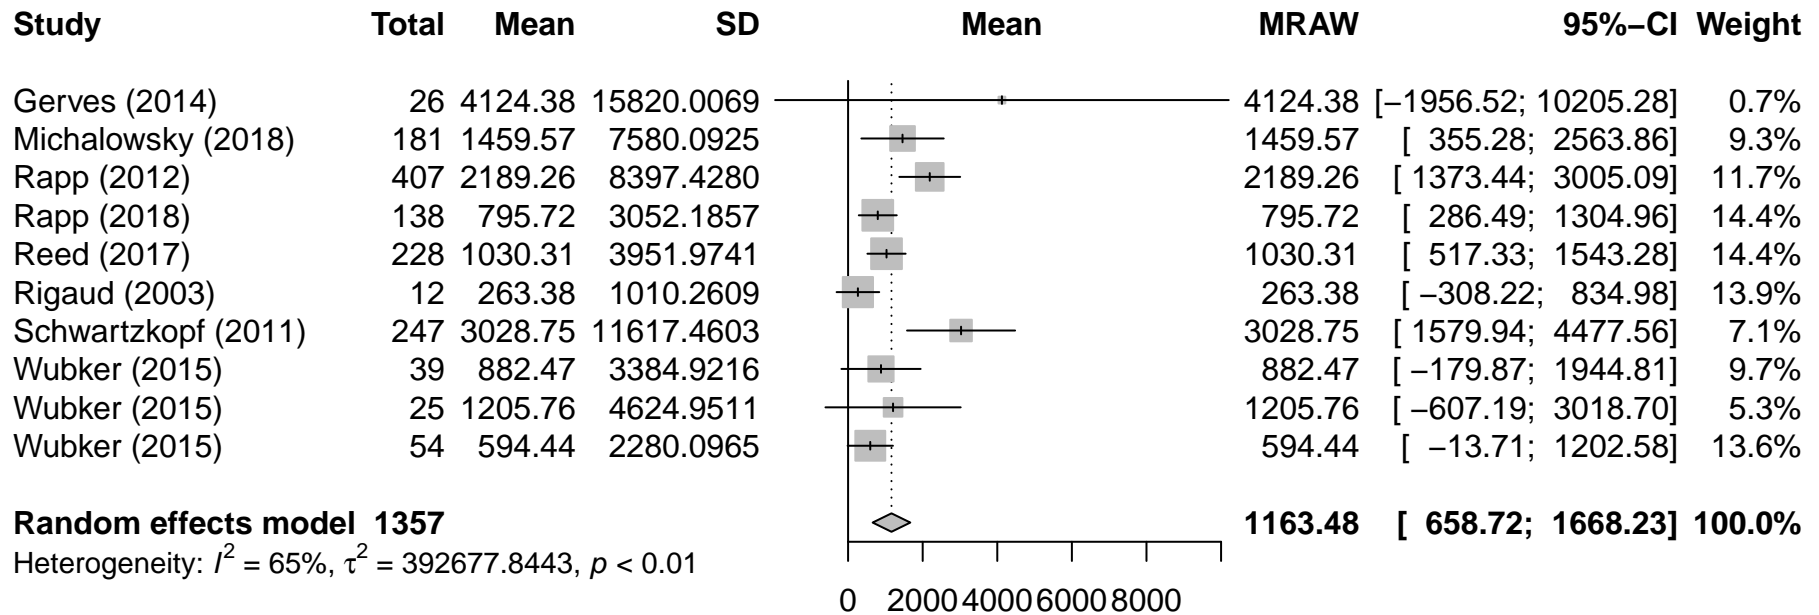

Western Europe, Community, Mild, Caregiver time

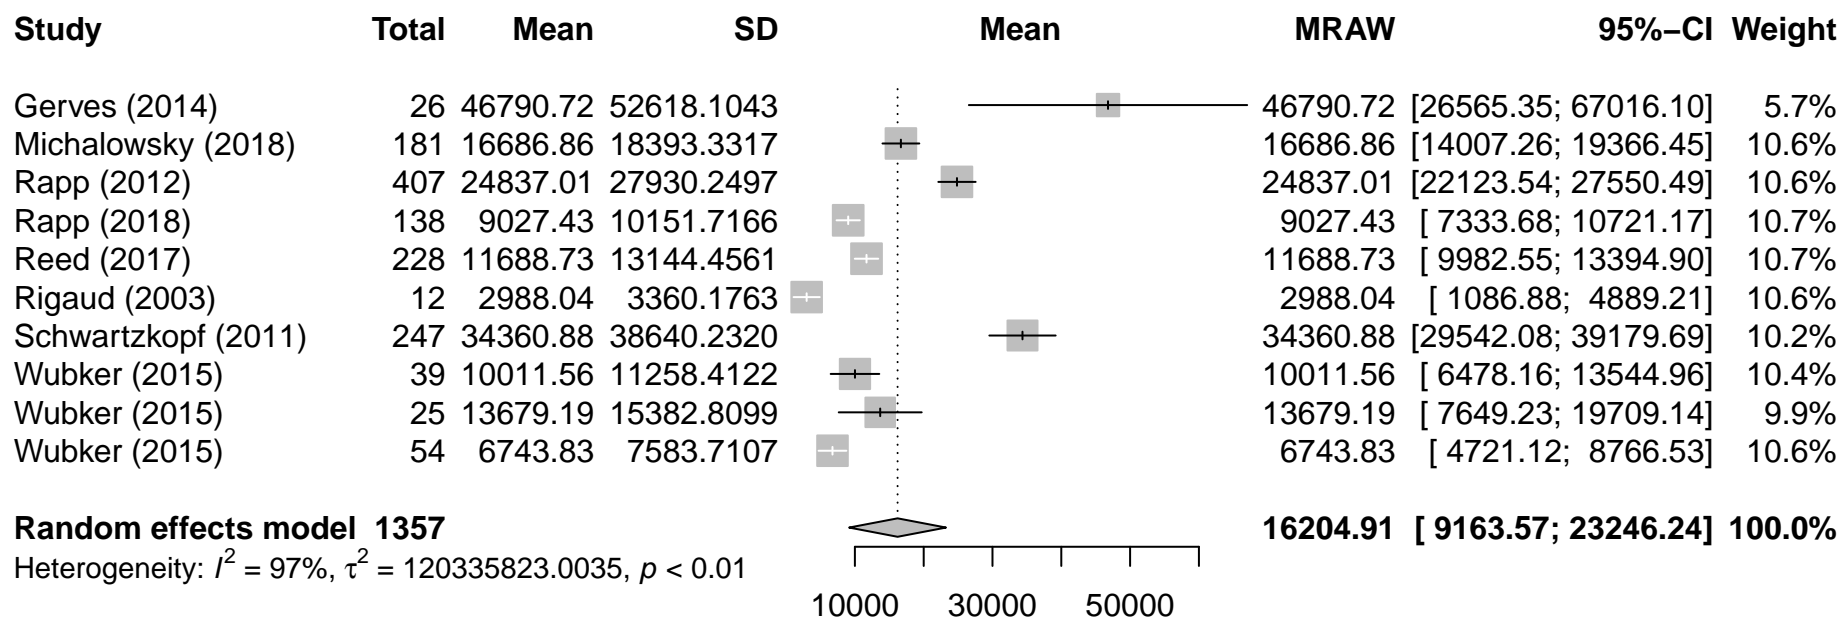

Western Europe, Community, Moderate, Inpatient care

| Study                       | Total       | Mean    | SD         | Mean | MRAW           | 95%-CI                     | Weight        |
|-----------------------------|-------------|---------|------------|------|----------------|----------------------------|---------------|
| Afonso–Argiles (2020)       | 148         | 3811.13 | 13959.6877 |      | 3811.13        | [ 1562.11; 6060.15]        | 5.4%          |
| Afonso–Argiles (2020)       | 106         | 2610.99 | 9343.6028  |      | 2610.99        | [ 832.27; 4389.72]         | 6.4%          |
| Afonso–Argiles (2020)       | 164         | 296.88  | 784.7645   |      | 296.88         | [ 176.77; 416.98]          | 9.8%          |
| Gerves (2014)               | 28          | 4271.66 | 15937.9030 |      | 4271.66        | [−1631.71; 10175.04]       | 1.5%          |
| Menn (2012)                 | 171         | 8801.49 | 32839.0300 |      | 8801.49        | [ 3879.50; 13723.47]       | 2.0%          |
| Michalowsky (2018)          | 93          | 2089.58 | 1991.0529  |      | 2089.58        | [ 1684.92; 2494.24]        | 9.5%          |
| Rapp (2012)                 | 408         | 2634.81 | 9830.6706  |      | 2634.81        | [ 1680.91; 3588.70]        | 8.5%          |
| Rapp (2018)                 | 276         | 2855.00 | 10652.2385 |      | 2855.00        | [ 1598.30; 4111.71]        | 7.8%          |
| Reed (2017)                 | 157         | 2350.08 | 8768.3454  |      | 2350.08        | [ 978.52; 3721.65]         | 7.5%          |
| Rigaud (2003)               | 25          | 3583.61 | 13370.7317 |      | 3583.61        | [−1657.62; 8824.84]        | 1.8%          |
| Schwartzkopf (2011)         | 135         | 4279.97 | 15968.8898 |      | 4279.97        | [ 1586.23; 6973.71]        | 4.5%          |
| Schwartzkopf (2013)         | 729         | 3107.54 | 11594.4759 |      | 3107.54        | [ 2265.88; 3949.20]        | 8.8%          |
| Scuvee–Moreau (2002)        | 113         | 2445.99 | 9126.1802  |      | 2445.99        | [ 763.32; 4128.66]         | 6.7%          |
| Souetre (1995)              | 23          | 0.00    | 1.0000     |      | 0.00           | [ −0.41; 0.41]             | 9.8%          |
| Wubker (2015)               | 79          | 6732.29 | 25118.6837 |      | 6732.29        | [ 1193.29; 12271.29]       | 1.6%          |
| Wubker (2015)               | 35          | 3474.16 | 12962.3692 |      | 3474.16        | [ −820.20; 7768.52]        | 2.4%          |
| Wubker (2015)               | 72          | 2238.69 | 8352.7432  |      | 2238.69        | [ 309.34; 4168.04]         | 6.1%          |
| <b>Random effects model</b> | <b>2762</b> |         |            |      | <b>2480.84</b> | <b>[ 1708.12; 3253.55]</b> | <b>100.0%</b> |

Heterogeneity:  $I^2 = 95\%$ ,  $\tau^2 = 1586320.2169$ ,  $p < 0.01$

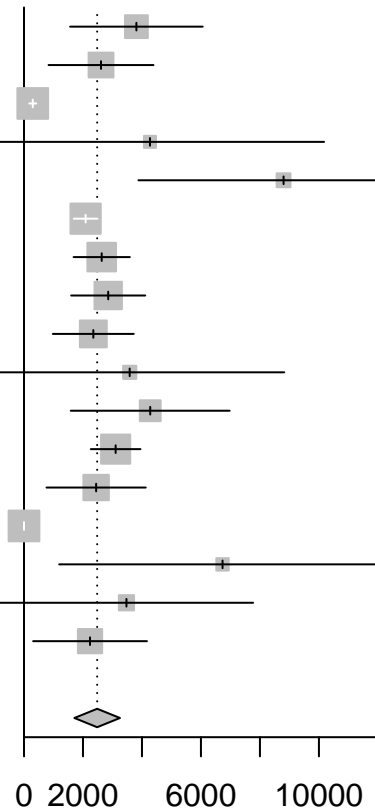



Western Europe, Community, Moderate, Outpatient care

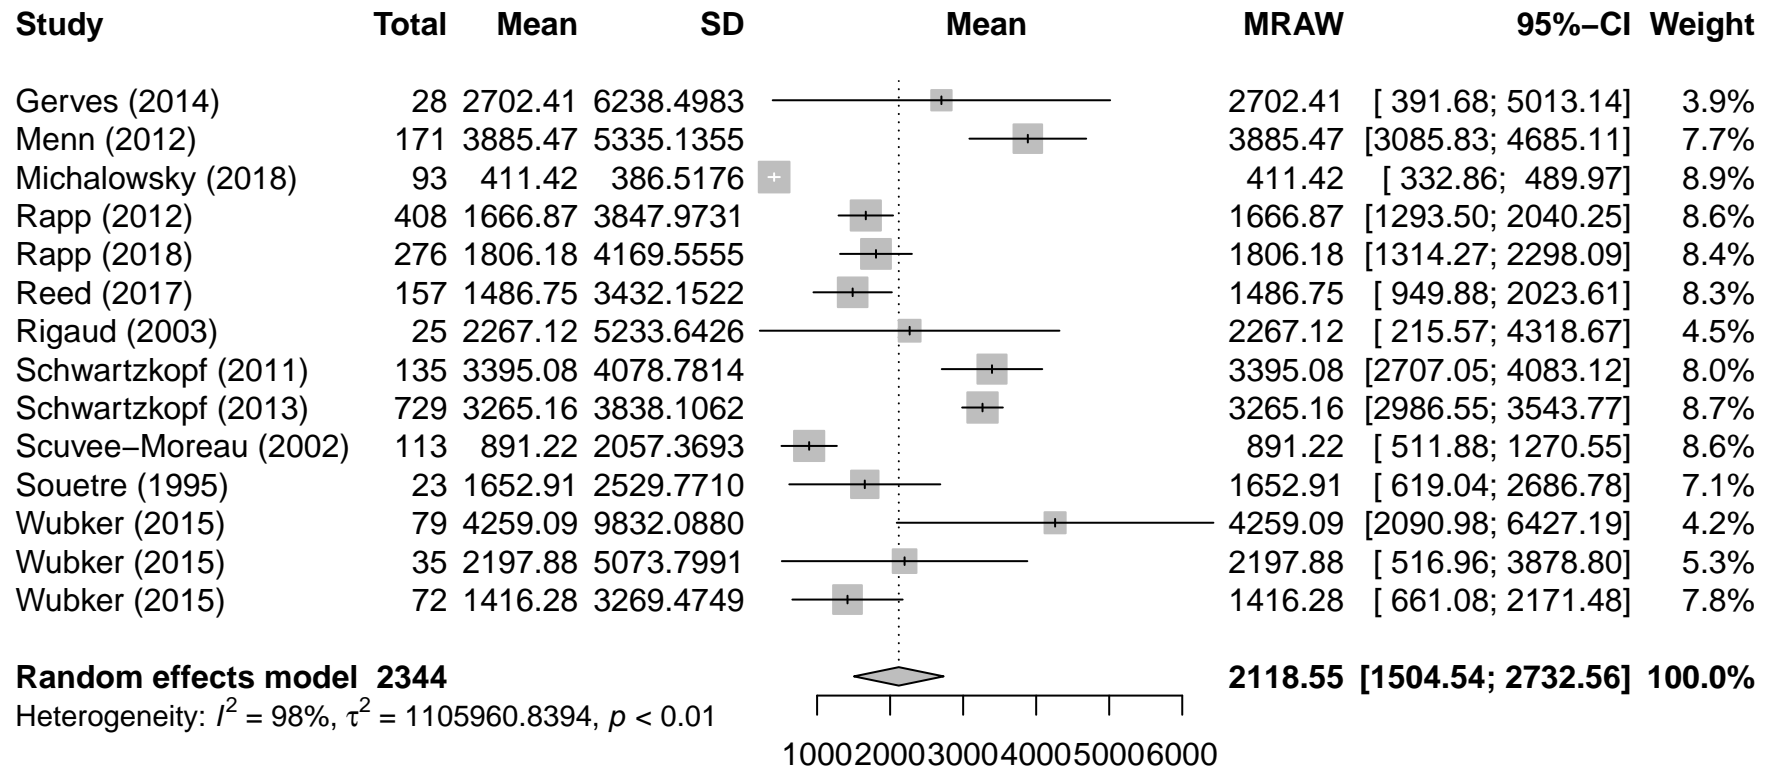

Western Europe, Community, Moderate, Pharmaceuticals

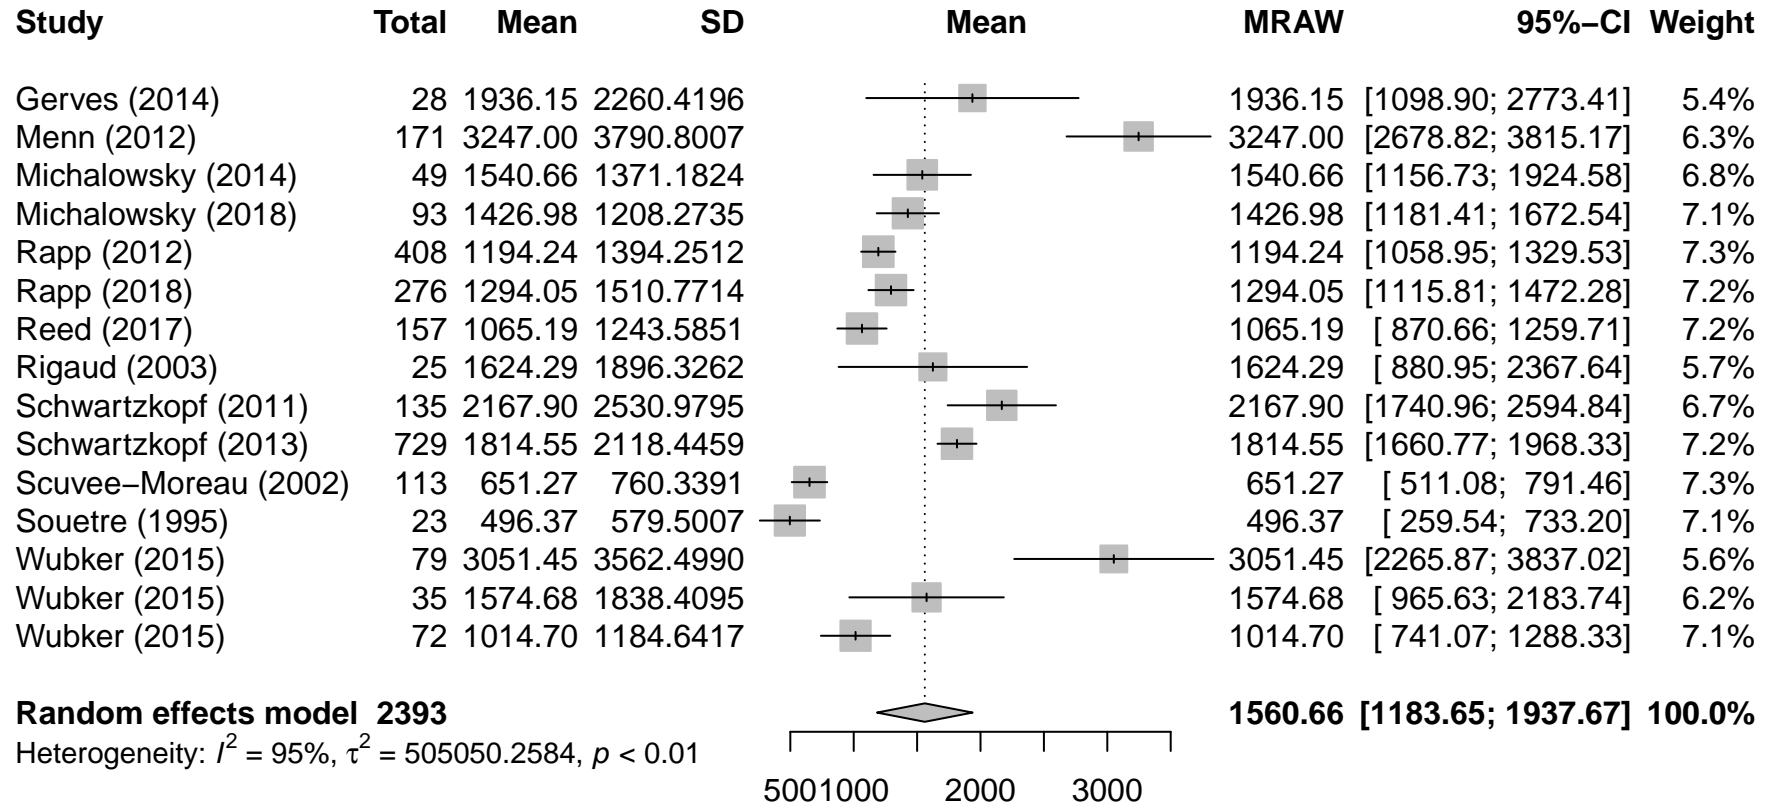

Western Europe, Community, Moderate, Institutional care

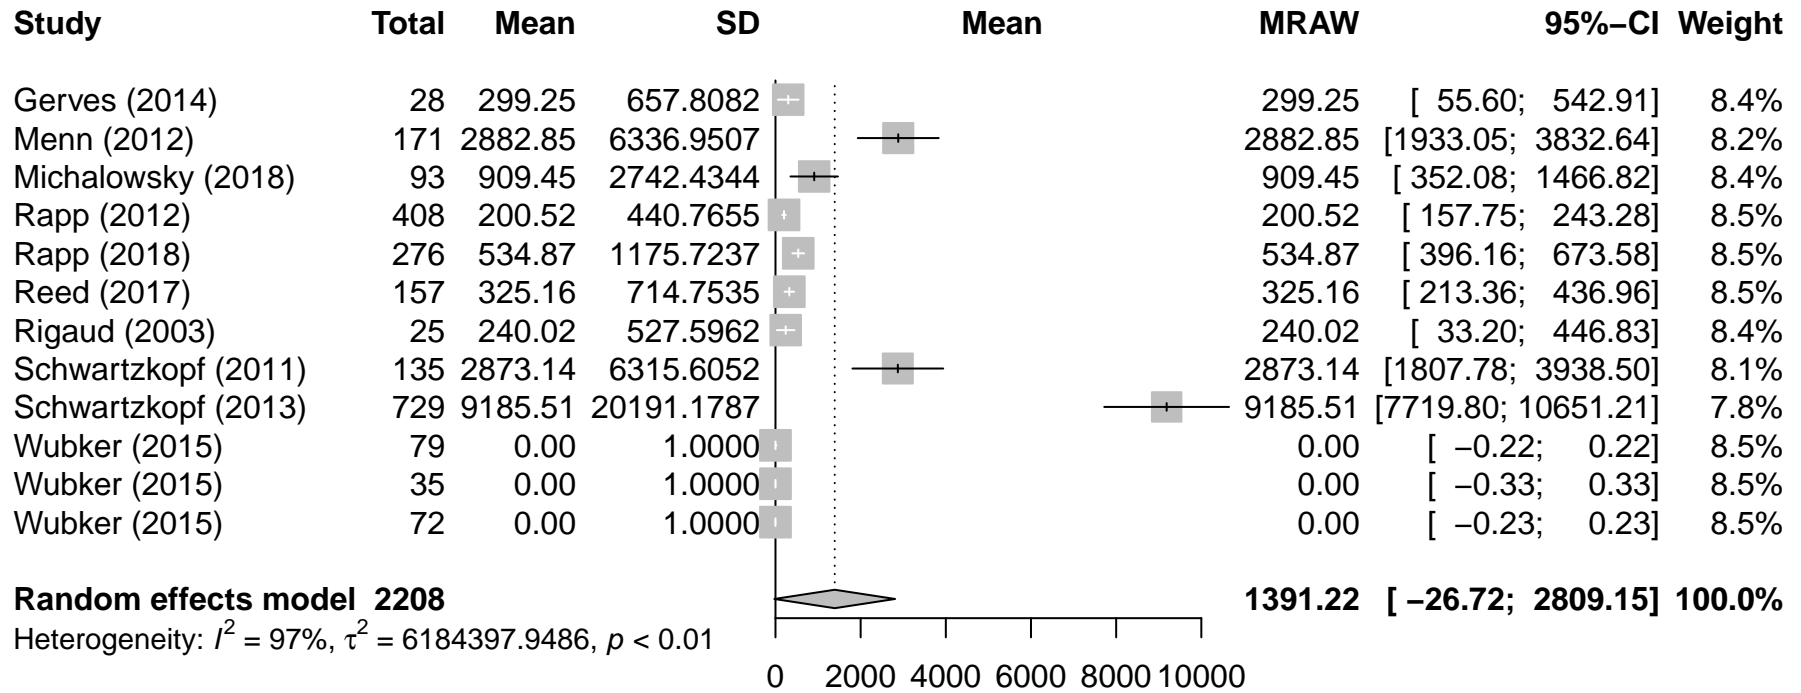

Western Europe, Community, Moderate, Community care

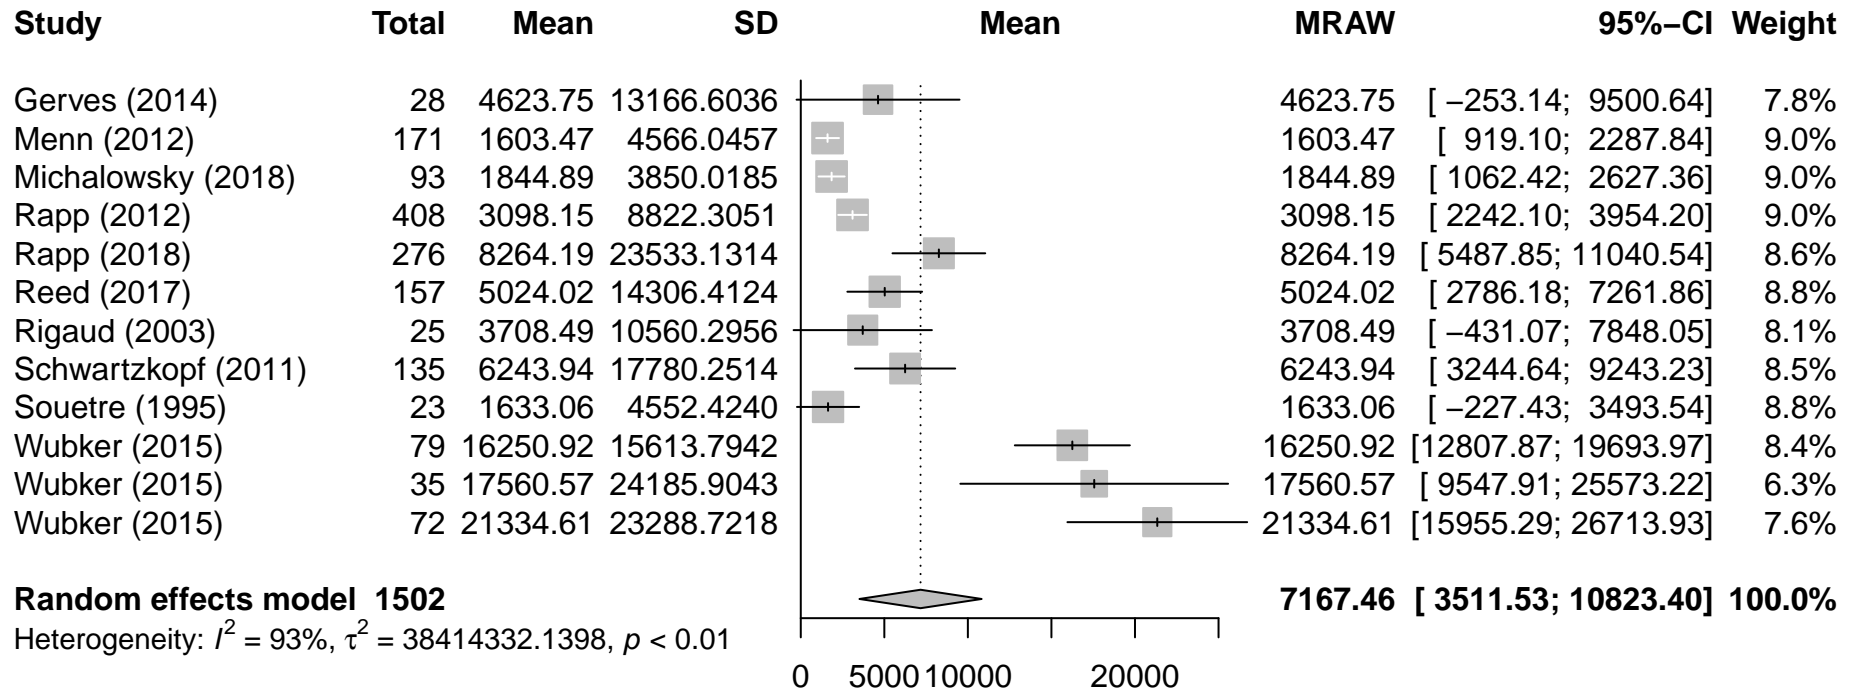

Western Europe, Community, Moderate, Caregiver work loss

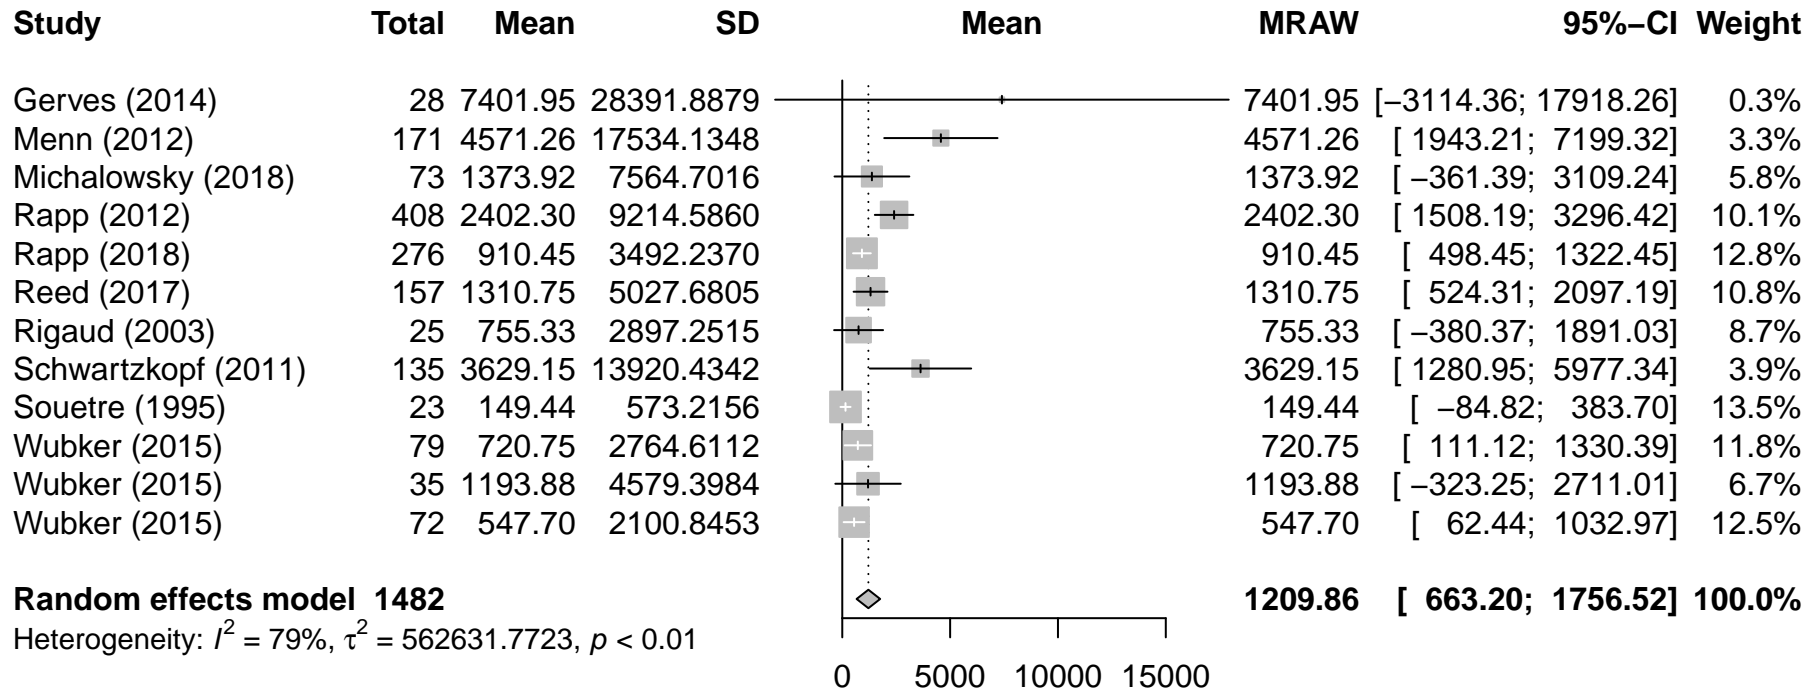

Western Europe, Community, Moderate, Caregiver time

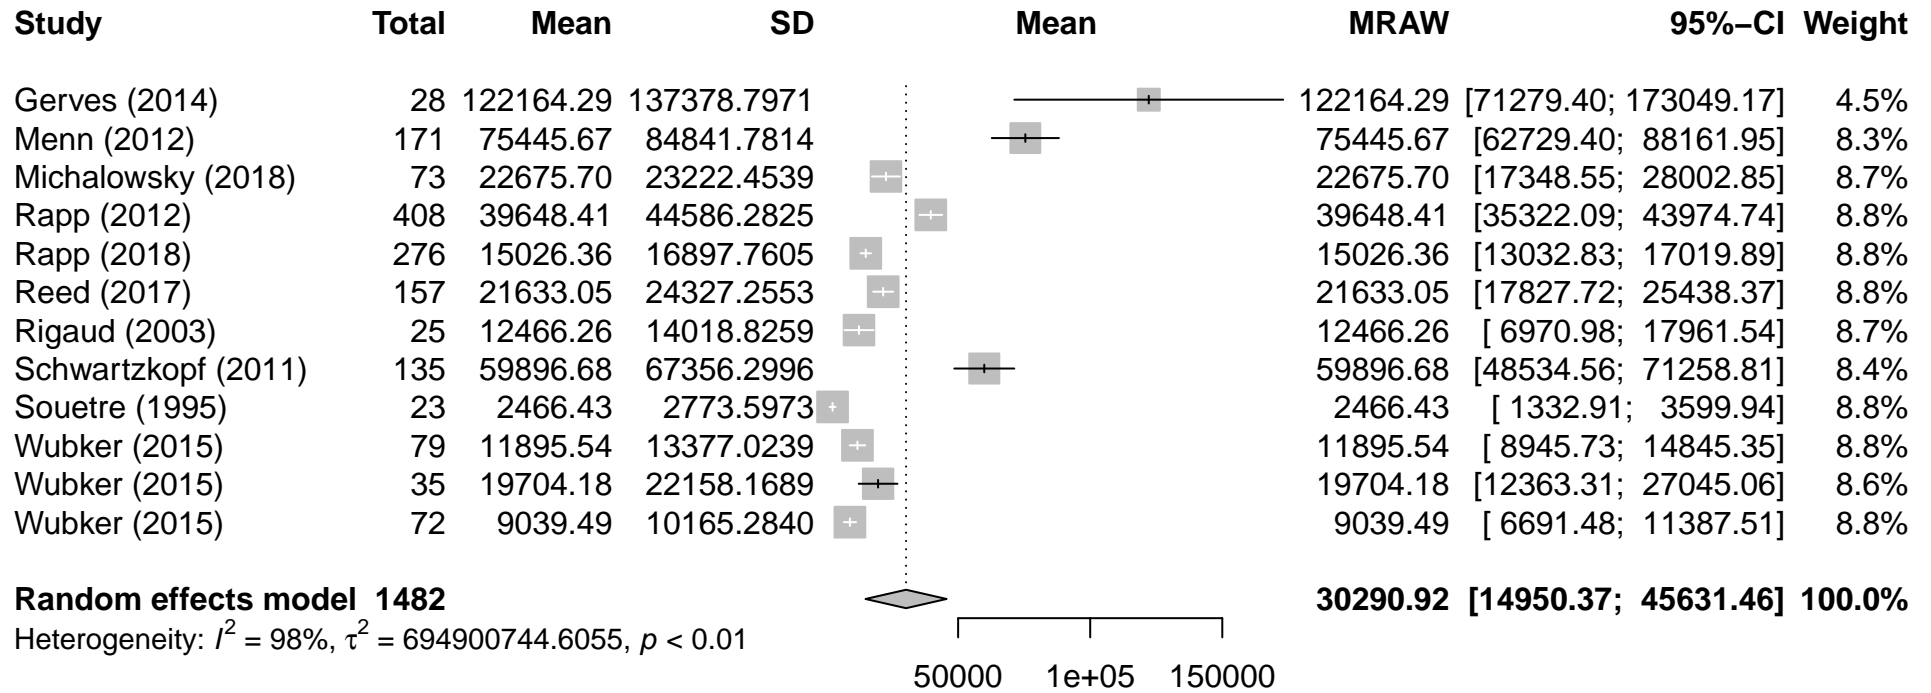

Western Europe, Community, Severe, Inpatient care

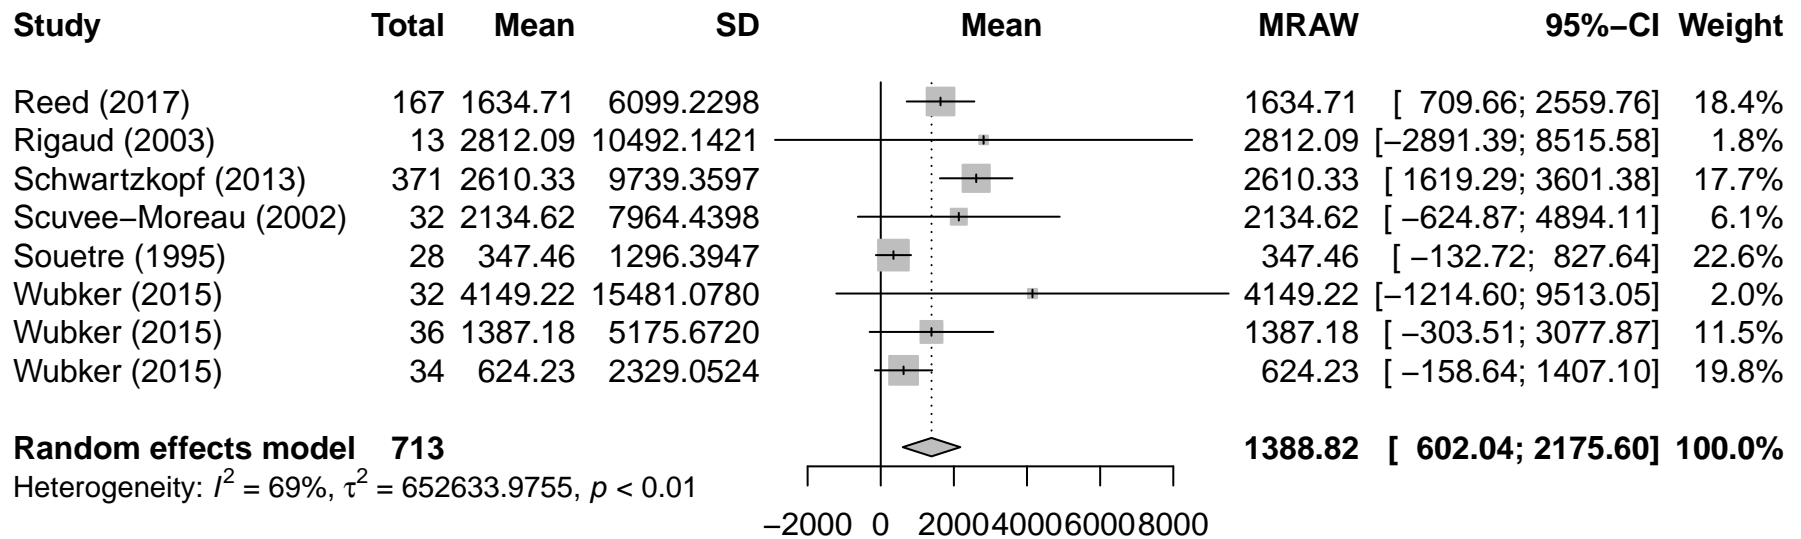

Western Europe, Community, Severe, Outpatient care

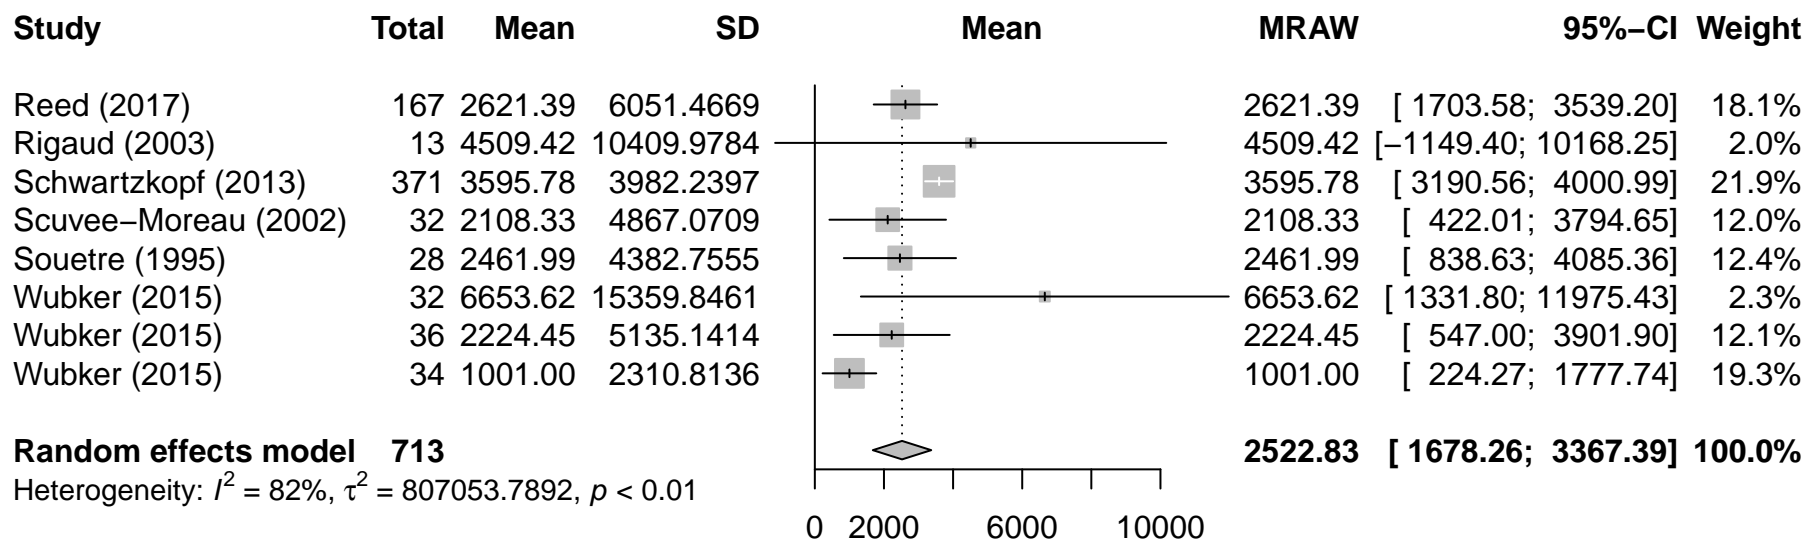



Western Europe, Community, Severe, Pharmaceuticals

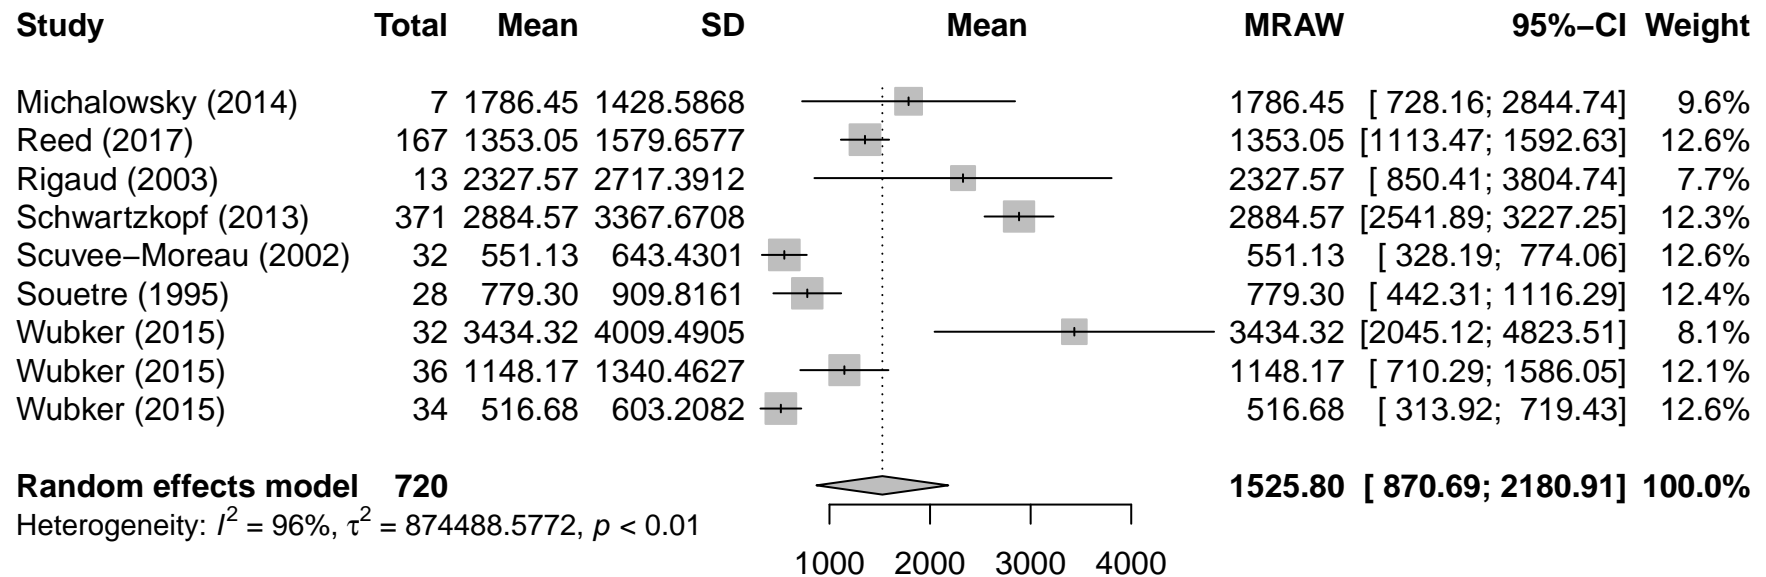

Western Europe, Community, Severe, Institutional care

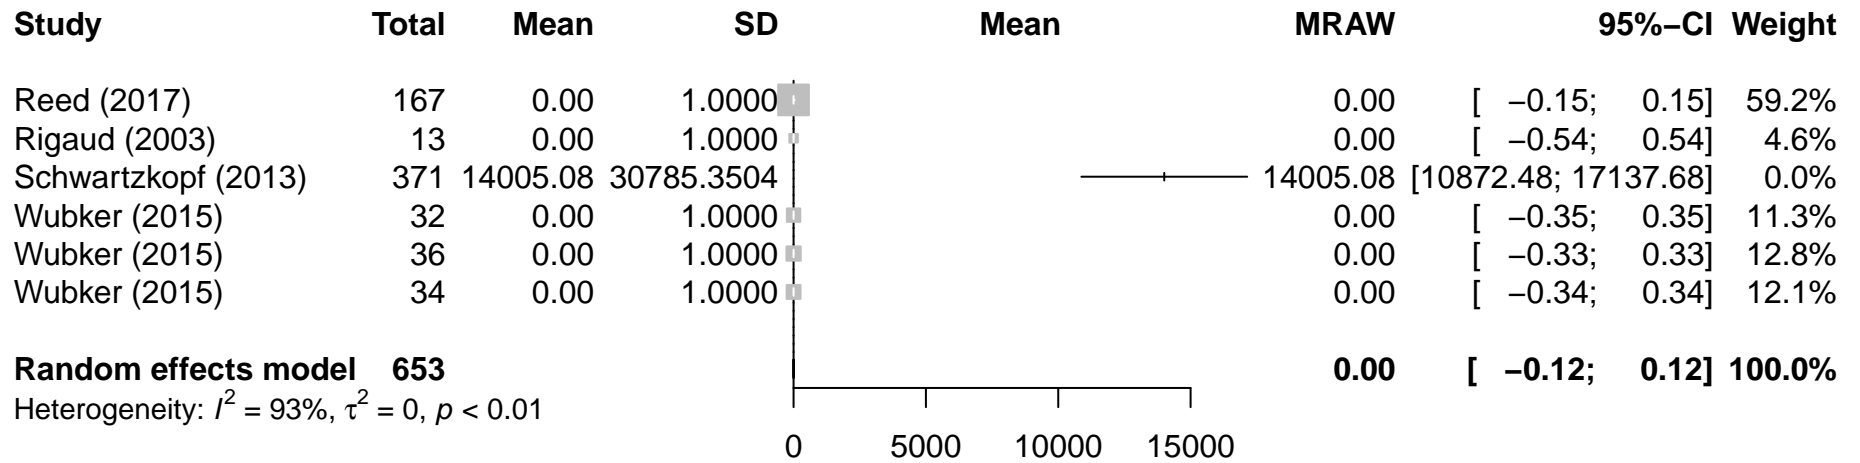

Western Europe, Community, Severe, Community care

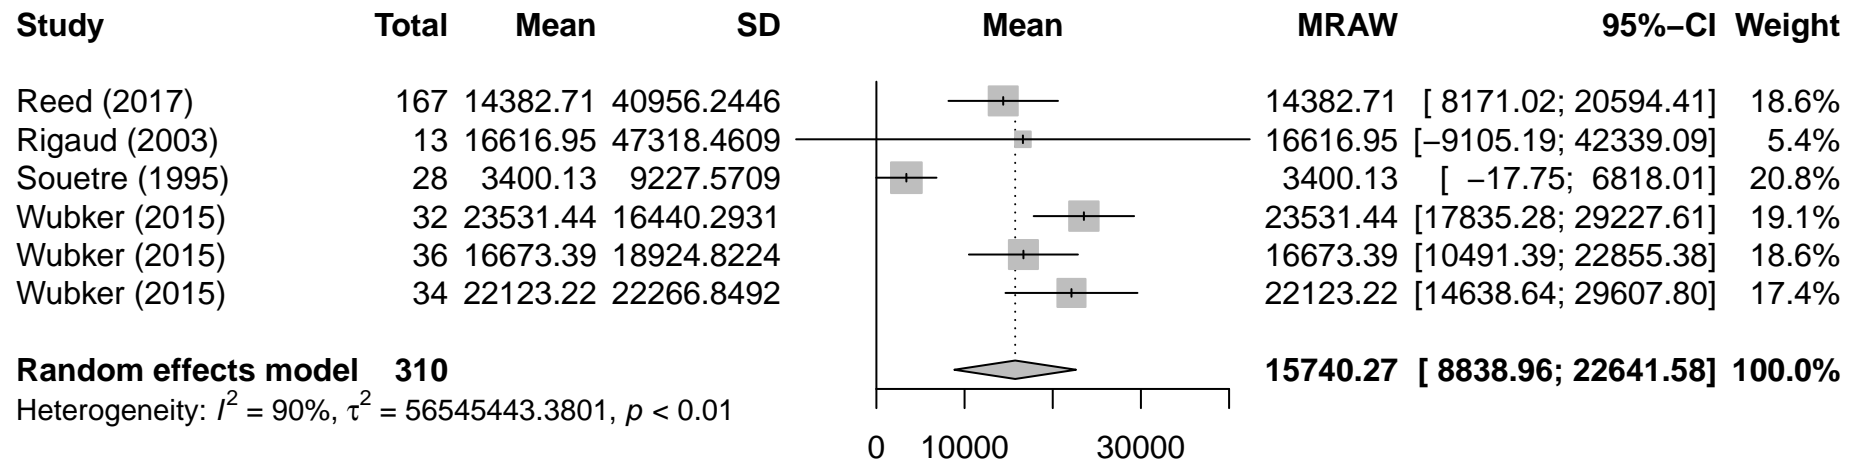

Western Europe, Community, Severe, Caregiver work loss

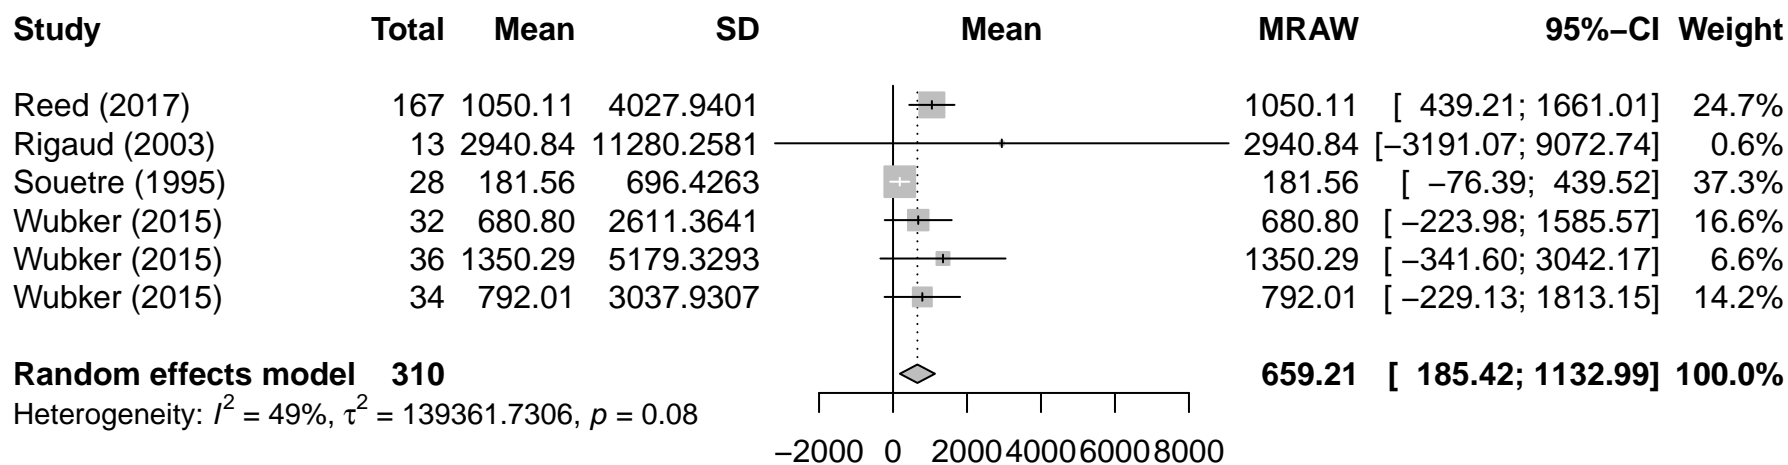

Western Europe, Community, Severe, Caregiver time

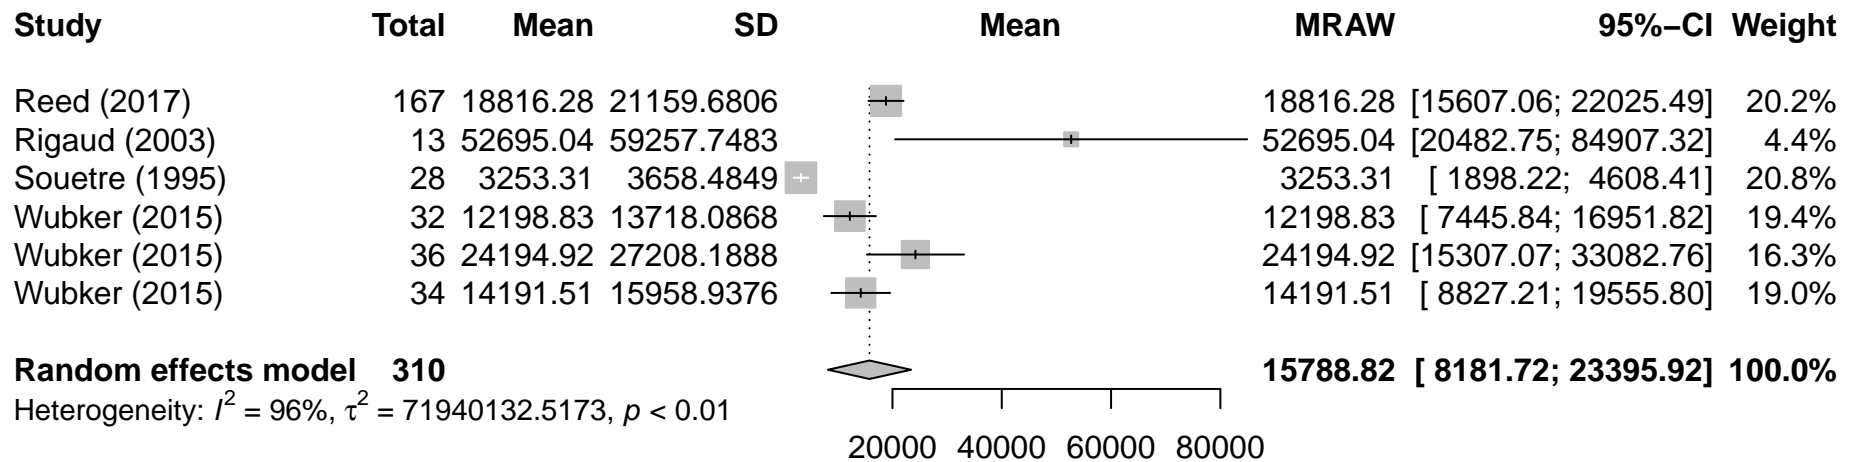

Western Europe, Community, All, Inpatient care

| Study                  | Total | Mean     | SD         | Mean | MRAW     | 95%-CI               | Weight |
|------------------------|-------|----------|------------|------|----------|----------------------|--------|
| Dodel (2015)           | 419   | 1887.02  | 12552.6275 |      | 1887.02  | [ 685.10; 3088.94]   | 3.8%   |
| Dodel (2015)           | 552   | 4168.35  | 21518.0544 |      | 4168.35  | [ 2373.28; 5963.42]  | 3.5%   |
| Graff (2008)           | 65    | 5245.11  | 21996.2966 |      | 5245.11  | [ -102.27; 10592.49] | 1.7%   |
| Gustavsson (2010)      | 490   | 909.84   | 7011.9829  |      | 909.84   | [ 288.98; 1530.69]   | 3.9%   |
| Handels (2013)         | 219   | 3768.36  | 2276.1902  |      | 3768.36  | [ 3466.90; 4069.82]  | 4.0%   |
| Handels (2018)         | 54    | 1955.32  | 2599.9261  |      | 1955.32  | [ 1261.88; 2648.77]  | 3.9%   |
| Handels (2018)         | 51    | 559.75   | 662.7342   |      | 559.75   | [ 377.86; 741.63]    | 4.0%   |
| Joling (2015)          | 192   | 21099.45 | 32117.3968 |      | 21099.45 | [16556.50; 25642.40] | 2.1%   |
| König (2014)           | 128   | 3531.03  | 9461.8107  |      | 3531.03  | [ 1891.89; 5170.18]  | 3.6%   |
| MacNeil Vroomen (2016) | 73    | 2836.99  | 8056.3473  |      | 2836.99  | [ 988.89; 4685.08]   | 3.5%   |
| Meeuwssen (2013)       | 77    | 2267.77  | 7565.0450  |      | 2267.77  | [ 578.05; 3957.49]   | 3.5%   |
| Michalowsky (2018)     | 425   | 2733.77  | 6483.1020  |      | 2733.77  | [ 2117.41; 3350.14]  | 3.9%   |
| Mostardt (2012)        | 76    | 590.13   | 2201.8137  |      | 590.13   | [ 95.11; 1085.15]    | 4.0%   |
| Paraponaris (2015)     | 513   | 2981.72  | 11125.0144 |      | 2981.72  | [ 2019.02; 3944.41]  | 3.8%   |
| Reed (2017)            | 550   | 2434.71  | 9084.0801  |      | 2434.71  | [ 1675.52; 3193.89]  | 3.9%   |
| Reese (2011)           | 272   | 596.47   | 3817.3932  |      | 596.47   | [ 142.81; 1050.13]   | 4.0%   |
| Rigaud (2003)          | 50    | 3224.54  | 12111.6589 |      | 3224.54  | [ -132.58; 6581.66]  | 2.7%   |
| Schwartzkopf (2011)    | 383   | 4750.93  | 17726.1017 |      | 4750.93  | [ 2975.67; 6526.19]  | 3.5%   |
| Schwartzkopf (2013)    | 5584  | 2550.11  | 9514.6421  |      | 2550.11  | [ 2300.55; 2799.66]  | 4.0%   |
| Scuvee-Moreau (2002)   | 218   | 2616.76  | 9858.3811  |      | 2616.76  | [ 1308.10; 3925.41]  | 3.7%   |
| Steinbeisser (2020)    | 171   | 641.84   | 2394.7542  |      | 641.84   | [ 282.91; 1000.77]   | 4.0%   |
| van Santen (2021)      | 39    | 740.07   | 2761.2668  |      | 740.07   | [ -126.54; 1606.68]  | 3.9%   |
| Vandepitte (2020)      | 355   | 4148.41  | 15478.0425 |      | 4148.41  | [ 2538.32; 5758.50]  | 3.6%   |
| Vroomen (2016)         | 73    | 186.59   | 1609.2641  |      | 186.59   | [ -182.57; 555.75]   | 4.0%   |
| Wohlgemuth (2020)      | 424   | 3923.98  | 14640.6667 |      | 3923.98  | [ 2530.42; 5317.54]  | 3.7%   |
| Wubker (2015)          | 150   | 5323.20  | 20696.2037 |      | 5323.20  | [ 2011.17; 8635.22]  | 2.7%   |
| Wubker (2015)          | 96    | 2592.99  | 10341.1782 |      | 2592.99  | [ 524.36; 4661.61]   | 3.4%   |
| Wubker (2015)          | 160   | 1673.77  | 6684.1511  |      | 1673.77  | [ 638.06; 2709.47]   | 3.8%   |

**Random effects model 11859**

Heterogeneity:  $I^2 = 96\%$ ,  $\tau^2 = 5745662.3899$ ,  $p < 0.01$

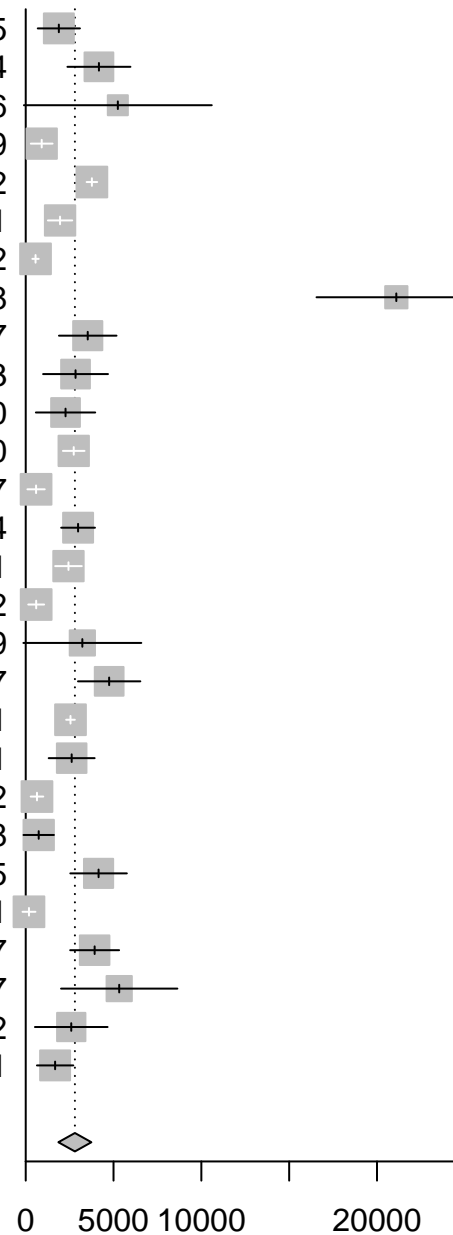

**2800.43 [ 1859.89; 3740.98] 100.0%**

Western Europe, Community, All, Outpatient care

| Study                  | Total | Mean    | SD         | Mean | MRAW    | 95%-CI             | Weight |
|------------------------|-------|---------|------------|------|---------|--------------------|--------|
| Dodel (2015)           | 419   | 1957.43 | 4478.7097  |      | 1957.43 | [1528.59; 2386.27] | 3.9%   |
| Dodel (2015)           | 552   | 2027.84 | 5661.1354  |      | 2027.84 | [1555.58; 2500.11] | 3.8%   |
| Graff (2008)           | 65    | 1042.61 | 1944.8593  |      | 1042.61 | [ 569.80; 1515.41] | 3.8%   |
| Handels (2013)         | 219   | 2077.51 | 638.8022   |      | 2077.51 | [1992.91; 2162.12] | 4.0%   |
| Handels (2018)         | 54    | 1569.89 | 661.6518   |      | 1569.89 | [1393.42; 1746.36] | 4.0%   |
| Handels (2018)         | 51    | 1330.62 | 502.9679   |      | 1330.62 | [1192.58; 1468.66] | 4.0%   |
| Joling (2015)          | 192   | 1251.39 | 1371.9732  |      | 1251.39 | [1057.33; 1445.45] | 4.0%   |
| König (2014)           | 128   | 1956.70 | 2051.4735  |      | 1956.70 | [1601.30; 2312.09] | 3.9%   |
| MacNeil Vroomen (2016) | 73    | 638.40  | 696.8465   |      | 638.40  | [ 478.54; 798.25]  | 4.0%   |
| Meeuwesen (2013)       | 77    | 1506.68 | 1135.3728  |      | 1506.68 | [1253.08; 1760.27] | 3.9%   |
| Michalowsky (2018)     | 425   | 494.79  | 410.3366   |      | 494.79  | [ 455.77; 533.80]  | 4.0%   |
| Mostardt (2012)        | 76    | 317.99  | 526.2105   |      | 317.99  | [ 199.68; 436.29]  | 4.0%   |
| Paraponaris (2015)     | 513   | 789.89  | 1823.4468  |      | 789.89  | [ 632.09; 947.68]  | 4.0%   |
| Reed (2017)            | 550   | 644.98  | 1488.9272  |      | 644.98  | [ 520.54; 769.41]  | 4.0%   |
| Reese (2011)           | 272   | 582.15  | 684.0254   |      | 582.15  | [ 500.86; 663.44]  | 4.0%   |
| Rigaud (2003)          | 50    | 2596.10 | 6723.6603  |      | 2596.10 | [ 732.44; 4459.77] | 2.4%   |
| Schwartzkopf (2011)    | 383   | 2959.32 | 3541.5820  |      | 2959.32 | [2604.63; 3314.01] | 3.9%   |
| Schwartzkopf (2013)    | 5584  | 2787.18 | 3062.3039  |      | 2787.18 | [2706.86; 2867.50] | 4.0%   |
| Scuvee-Moreau (2002)   | 218   | 1047.10 | 2659.9317  |      | 1047.10 | [ 694.00; 1400.19] | 3.9%   |
| Steinbeisser (2020)    | 171   | 170.03  | 392.5125   |      | 170.03  | [ 111.20; 228.86]  | 4.0%   |
| van Santen (2021)      | 39    | 196.05  | 452.5858   |      | 196.05  | [ 54.01; 338.09]   | 4.0%   |
| Vandepitte (2020)      | 355   | 7900.54 | 18238.3633 |      | 7900.54 | [6003.31; 9797.77] | 2.4%   |
| Vroomen (2016)         | 73    | 3475.38 | 8086.4285  |      | 3475.38 | [1620.38; 5330.38] | 2.4%   |
| Wohlgemuth (2020)      | 424   | 1039.50 | 2399.6802  |      | 1039.50 | [ 811.09; 1267.91] | 3.9%   |
| Wubker (2015)          | 150   | 4031.53 | 10358.6839 |      | 4031.53 | [2373.83; 5689.23] | 2.7%   |
| Wubker (2015)          | 96    | 1968.82 | 4659.9627  |      | 1968.82 | [1036.65; 2900.99] | 3.4%   |
| Wubker (2015)          | 160   | 1070.71 | 2612.9175  |      | 1070.71 | [ 665.85; 1475.58] | 3.9%   |

Random effects model 11369

Heterogeneity:  $I^2 = 99\%$ ,  $\tau^2 = 1420525.2984$ ,  $p = 0$

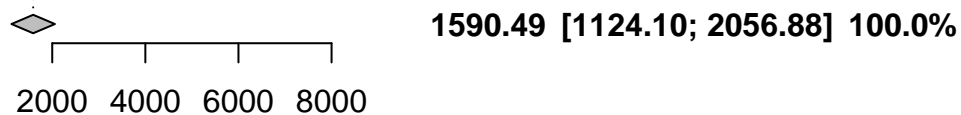

Western Europe, Community, All, Pharmaceuticals

| Study                  | Total | Mean    | SD        | Mean | MRAW    | 95%-CI             | Weight |
|------------------------|-------|---------|-----------|------|---------|--------------------|--------|
| Dodel (2015)           | 419   | 1887.02 | 901.2641  |      | 1887.02 | [1800.73; 1973.32] | 4.2%   |
| Dodel (2015)           | 552   | 1844.78 | 999.8399  |      | 1844.78 | [1761.37; 1928.18] | 4.2%   |
| Gustavsson (2010)      | 490   | 918.81  | 795.9939  |      | 918.81  | [ 848.33; 989.29]  | 4.2%   |
| Handels (2013)         | 219   | 1972.66 | 603.6852  |      | 1972.66 | [1892.70; 2052.61] | 4.2%   |
| Joling (2015)          | 192   | 1256.16 | 1289.3242 |      | 1256.16 | [1073.79; 1438.53] | 4.1%   |
| König (2014)           | 128   | 1794.04 | 1648.3822 |      | 1794.04 | [1508.48; 2079.60] | 4.0%   |
| MacNeil Vroomen (2016) | 73    | 1036.22 | 3393.9932 |      | 1036.22 | [ 257.65; 1814.79] | 3.2%   |
| Meeuwssen (2013)       | 77    | 3168.44 | 2616.8926 |      | 3168.44 | [2583.93; 3752.94] | 3.6%   |
| Michalowsky (2014)     | 205   | 1466.03 | 1204.3182 |      | 1466.03 | [1301.17; 1630.89] | 4.1%   |
| Michalowsky (2018)     | 425   | 1716.05 | 1835.1466 |      | 1716.05 | [1541.58; 1890.52] | 4.1%   |
| Mostardt (2012)        | 76    | 110.50  | 129.0006  |      | 110.50  | [ 81.49; 139.50]   | 4.2%   |
| Paraponaris (2015)     | 513   | 713.75  | 833.2899  |      | 713.75  | [ 641.64; 785.86]  | 4.2%   |
| Reed (2017)            | 550   | 582.81  | 680.4191  |      | 582.81  | [ 525.95; 639.68]  | 4.2%   |
| Reese (2011)           | 272   | 878.00  | 1092.7288 |      | 878.00  | [ 748.14; 1007.86] | 4.1%   |
| Rigaud (2003)          | 50    | 1738.30 | 2106.7535 |      | 1738.30 | [1154.35; 2322.25] | 3.6%   |
| Schwartzkopf (2011)    | 383   | 1953.05 | 2280.1489 |      | 1953.05 | [1724.70; 2181.41] | 4.1%   |
| Schwartzkopf (2013)    | 5584  | 1627.45 | 1900.0186 |      | 1627.45 | [1577.62; 1677.29] | 4.2%   |
| Scuvee-Moreau (2002)   | 218   | 713.14  | 853.8116  |      | 713.14  | [ 599.80; 826.48]  | 4.2%   |
| Steinbeisser (2020)    | 171   | 153.64  | 179.3728  |      | 153.64  | [ 126.76; 180.53]  | 4.2%   |
| van Santen (2021)      | 39    | 177.16  | 206.8254  |      | 177.16  | [ 112.24; 242.07]  | 4.2%   |
| Vroomen (2016)         | 73    | 1036.22 | 3393.9932 |      | 1036.22 | [ 257.65; 1814.79] | 3.2%   |
| Wohlgemuth (2020)      | 424   | 939.31  | 1096.6206 |      | 939.31  | [ 834.93; 1043.69] | 4.2%   |
| Wubker (2015)          | 150   | 2748.01 | 3390.7379 |      | 2748.01 | [2205.39; 3290.63] | 3.7%   |
| Wubker (2015)          | 96    | 1373.50 | 1628.5896 |      | 1373.50 | [1047.72; 1699.28] | 4.0%   |
| Wubker (2015)          | 160   | 810.58  | 994.6302  |      | 810.58  | [ 656.47; 964.70]  | 4.1%   |

Random effects model 11539

Heterogeneity:  $I^2 = 100\%$ ,  $\tau^2 = 534155.8042$ ,  $p = 0$

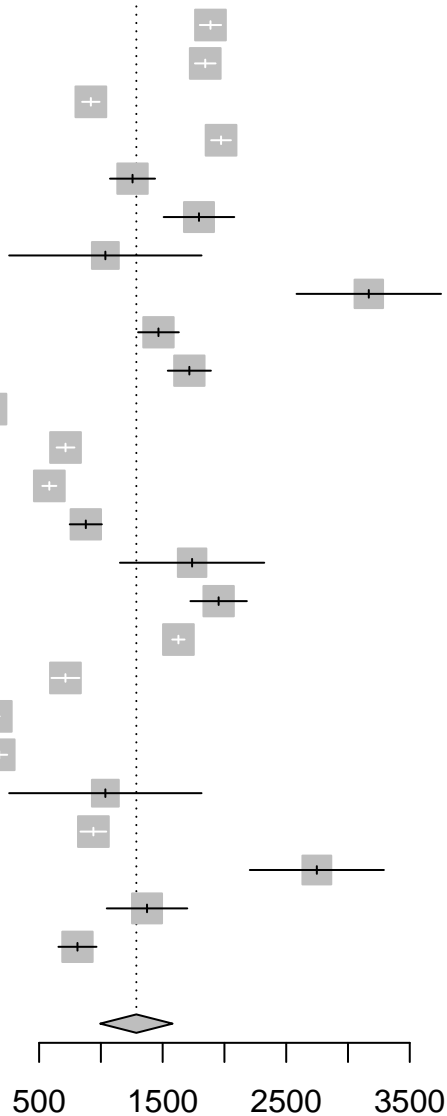

1287.20 [ 994.34; 1580.05] 100.0%



Western Europe, Community, All, Institutional care

| Study                  | Total | Mean     | SD         | Mean | MRAW     | 95%-CI               | Weight |
|------------------------|-------|----------|------------|------|----------|----------------------|--------|
| Dodel (2015)           | 419   | 563.29   | 2844.6149  |      | 563.29   | [ 290.92; 835.66]    | 4.0%   |
| Dodel (2015)           | 552   | 887.18   | 5717.3943  |      | 887.18   | [ 410.23; 1364.14]   | 4.0%   |
| Graff (2008)           | 65    | 3090.39  | 14938.6852 |      | 3090.39  | [ -541.26; 6722.04]  | 3.0%   |
| Gustavsson (2010)      | 490   | 752.22   | 4580.5833  |      | 752.22   | [ 346.64; 1157.79]   | 4.0%   |
| Handels (2013)         | 219   | 12606.64 | 8054.9451  |      | 12606.64 | [11539.83; 13673.46] | 3.9%   |
| Handels (2018)         | 54    | 442.82   | 996.5369   |      | 442.82   | [ 177.02; 708.61]    | 4.0%   |
| Handels (2018)         | 51    | 2555.13  | 3789.0248  |      | 2555.13  | [ 1515.23; 3595.03]  | 3.9%   |
| König (2014)           | 128   | 318.02   | 1434.7480  |      | 318.02   | [ 69.47; 566.58]     | 4.0%   |
| MacNeil Vroomen (2016) | 73    | 6587.56  | 16448.5845 |      | 6587.56  | [ 2814.31; 10360.81] | 3.0%   |
| Meeuwssen (2013)       | 77    | 12900.40 | 14670.8625 |      | 12900.40 | [ 9623.54; 16177.27] | 3.2%   |
| Michalowsky (2018)     | 425   | 400.59   | 1778.8471  |      | 400.59   | [ 231.47; 569.71]    | 4.0%   |
| Mostardt (2012)        | 76    | 290.24   | 637.9983   |      | 290.24   | [ 146.81; 433.68]    | 4.0%   |
| Paraponaris (2015)     | 513   | 3360.01  | 7385.8263  |      | 3360.01  | [ 2720.88; 3999.14]  | 4.0%   |
| Reed (2017)            | 550   | 2743.60  | 6030.8630  |      | 2743.60  | [ 2239.58; 3247.62]  | 4.0%   |
| Reese (2011)           | 272   | 816.61   | 1795.0371  |      | 816.61   | [ 603.29; 1029.93]   | 4.0%   |
| Rigaud (2003)          | 50    | 122.56   | 391.3066   |      | 122.56   | [ 14.09; 231.02]     | 4.0%   |
| Schwartzkopf (2011)    | 383   | 1741.85  | 3828.8523  |      | 1741.85  | [ 1358.39; 2125.30]  | 4.0%   |
| Schwartzkopf (2013)    | 5584  | 5329.59  | 11715.2779 |      | 5329.59  | [ 5022.32; 5636.87]  | 4.0%   |
| Steinbeisser (2020)    | 171   | 723.27   | 1589.8621  |      | 723.27   | [ 484.98; 961.56]    | 4.0%   |
| van Santen (2021)      | 39    | 833.97   | 1833.1875  |      | 833.97   | [ 258.63; 1409.30]   | 4.0%   |
| Vandepitte (2020)      | 355   | 2663.61  | 5855.0330  |      | 2663.61  | [ 2054.55; 3272.68]  | 4.0%   |
| Vroomen (2016)         | 73    | 6587.56  | 16448.5845 |      | 6587.56  | [ 2814.31; 10360.81] | 3.0%   |
| Wohlgemuth (2020)      | 424   | 601.47   | 1322.1332  |      | 601.47   | [ 475.63; 727.32]    | 4.0%   |
| Wubker (2015)          | 150   | 0.00     | 1.0000     |      | 0.00     | [ -0.16; 0.16]       | 4.0%   |
| Wubker (2015)          | 96    | 0.00     | 1.0000     |      | 0.00     | [ -0.20; 0.20]       | 4.0%   |
| Wubker (2015)          | 160   | 0.00     | 1.0000     |      | 0.00     | [ -0.15; 0.15]       | 4.0%   |

Random effects model 11449

Heterogeneity:  $I^2 = 99\%$ ,  $\tau^2 = 10677409.4582$ ,  $p = 0$

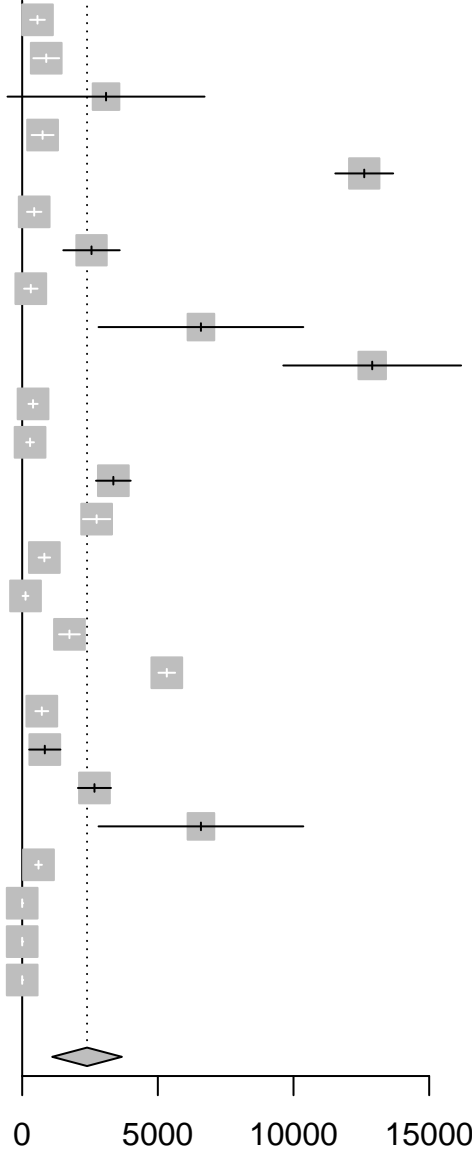

2390.42 [ 1107.57; 3673.28] 100.0%

Western Europe, Community, All, Community care

| Study                  | Total | Mean     | SD         | Mean | MRAW     | 95%-CI               | Weight |
|------------------------|-------|----------|------------|------|----------|----------------------|--------|
| Dodel (2015)           | 419   | 4956.95  | 10199.0024 |      | 4956.95  | [ 3980.39; 5933.51]  | 4.2%   |
| Dodel (2015)           | 552   | 2084.17  | 4579.4176  |      | 2084.17  | [ 1702.15; 2466.20]  | 4.2%   |
| Graff (2008)           | 65    | 17184.27 | 19365.5780 |      | 17184.27 | [12476.43; 21892.11] | 3.8%   |
| Gustavsson (2010)      | 490   | 4158.34  | 8586.0043  |      | 4158.34  | [ 3398.11; 4918.56]  | 4.2%   |
| Handels (2013)         | 219   | 20797.42 | 4672.8046  |      | 20797.42 | [20178.55; 21416.30] | 4.2%   |
| Handels (2018)         | 54    | 842.33   | 878.8197   |      | 842.33   | [ 607.93; 1076.72]   | 4.2%   |
| Handels (2018)         | 51    | 958.17   | 1102.5845  |      | 958.17   | [ 655.57; 1260.78]   | 4.2%   |
| Joling (2015)          | 192   | 1878.87  | 6463.1509  |      | 1878.87  | [ 964.67; 2793.07]   | 4.2%   |
| König (2014)           | 128   | 9328.29  | 20114.3894 |      | 9328.29  | [ 5843.71; 12812.87] | 4.0%   |
| MacNeil Vroomen (2016) | 73    | 33787.43 | 91038.0849 |      | 33787.43 | [12903.62; 54671.24] | 1.4%   |
| Meeuwesen (2013)       | 77    | 24069.86 | 29181.0962 |      | 24069.86 | [17552.01; 30587.71] | 3.5%   |
| Michalowsky (2018)     | 425   | 1287.31  | 3280.5275  |      | 1287.31  | [ 975.42; 1599.20]   | 4.2%   |
| Mostardt (2012)        | 76    | 540.34   | 1436.2826  |      | 540.34   | [ 217.43; 863.25]    | 4.2%   |
| Paraponaris (2015)     | 513   | 10312.33 | 29365.4169 |      | 10312.33 | [ 7771.21; 12853.45] | 4.1%   |
| Reed (2017)            | 550   | 8420.49  | 23978.1980 |      | 8420.49  | [ 6416.55; 10424.42] | 4.1%   |
| Reese (2011)           | 272   | 3373.62  | 5023.5652  |      | 3373.62  | [ 2776.62; 3970.62]  | 4.2%   |
| Rigaud (2003)          | 50    | 6405.05  | 26030.1359 |      | 6405.05  | [ -810.00; 13620.11] | 3.4%   |
| Schwartzkopf (2011)    | 383   | 6477.35  | 18444.9132 |      | 6477.35  | [ 4630.10; 8324.60]  | 4.1%   |
| Steinbeisser (2020)    | 171   | 3908.64  | 4490.4871  |      | 3908.64  | [ 3235.60; 4581.69]  | 4.2%   |
| van Santen (2021)      | 39    | 2559.56  | 7288.5975  |      | 2559.56  | [ 272.06; 4847.05]   | 4.1%   |
| Vandepitte (2020)      | 355   | 1492.32  | 4249.5458  |      | 1492.32  | [ 1050.27; 1934.38]  | 4.2%   |
| Vroomen (2016)         | 73    | 33600.84 | 91023.8604 |      | 33600.84 | [12720.29; 54481.39] | 1.4%   |
| Wohlgemuth (2020)      | 424   | 1846.01  | 5256.6892  |      | 1846.01  | [ 1345.65; 2346.36]  | 4.2%   |
| Wubker (2015)          | 150   | 17375.72 | 16378.9896 |      | 17375.72 | [14754.58; 19996.85] | 4.1%   |
| Wubker (2015)          | 96    | 15419.55 | 19474.6817 |      | 15419.55 | [11523.88; 19315.23] | 3.9%   |
| Wubker (2015)          | 160   | 20499.36 | 20825.7547 |      | 20499.36 | [17272.43; 23726.28] | 4.0%   |

**Random effects model 6057**

Heterogeneity:  $I^2 = 99\%$ ,  $\tau^2 = 56276112.2341$ ,  $p = 0$

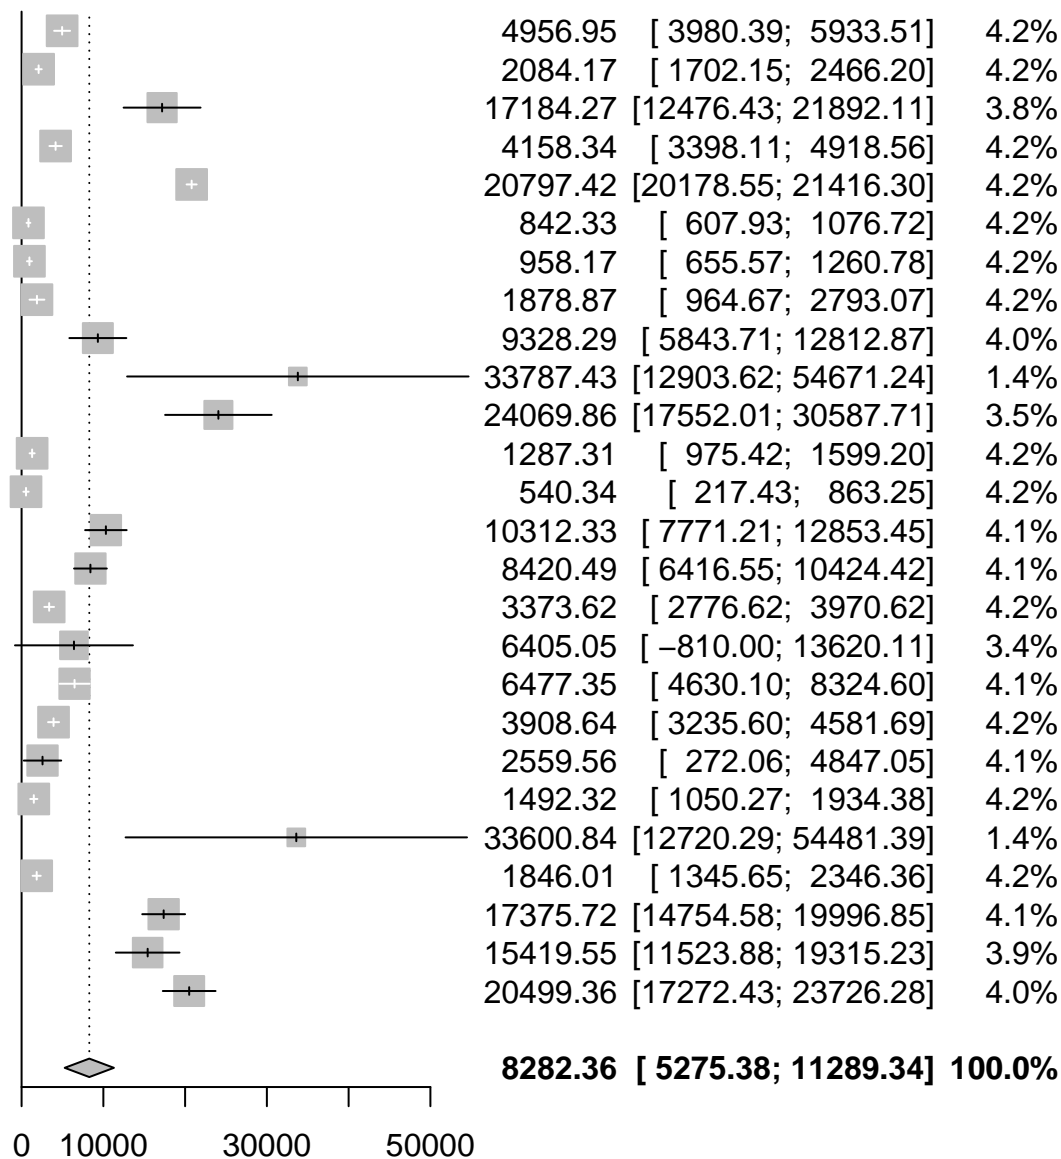

**8282.36 [ 5275.38; 11289.34] 100.0%**

Western Europe, Community, All, Caregiver work loss

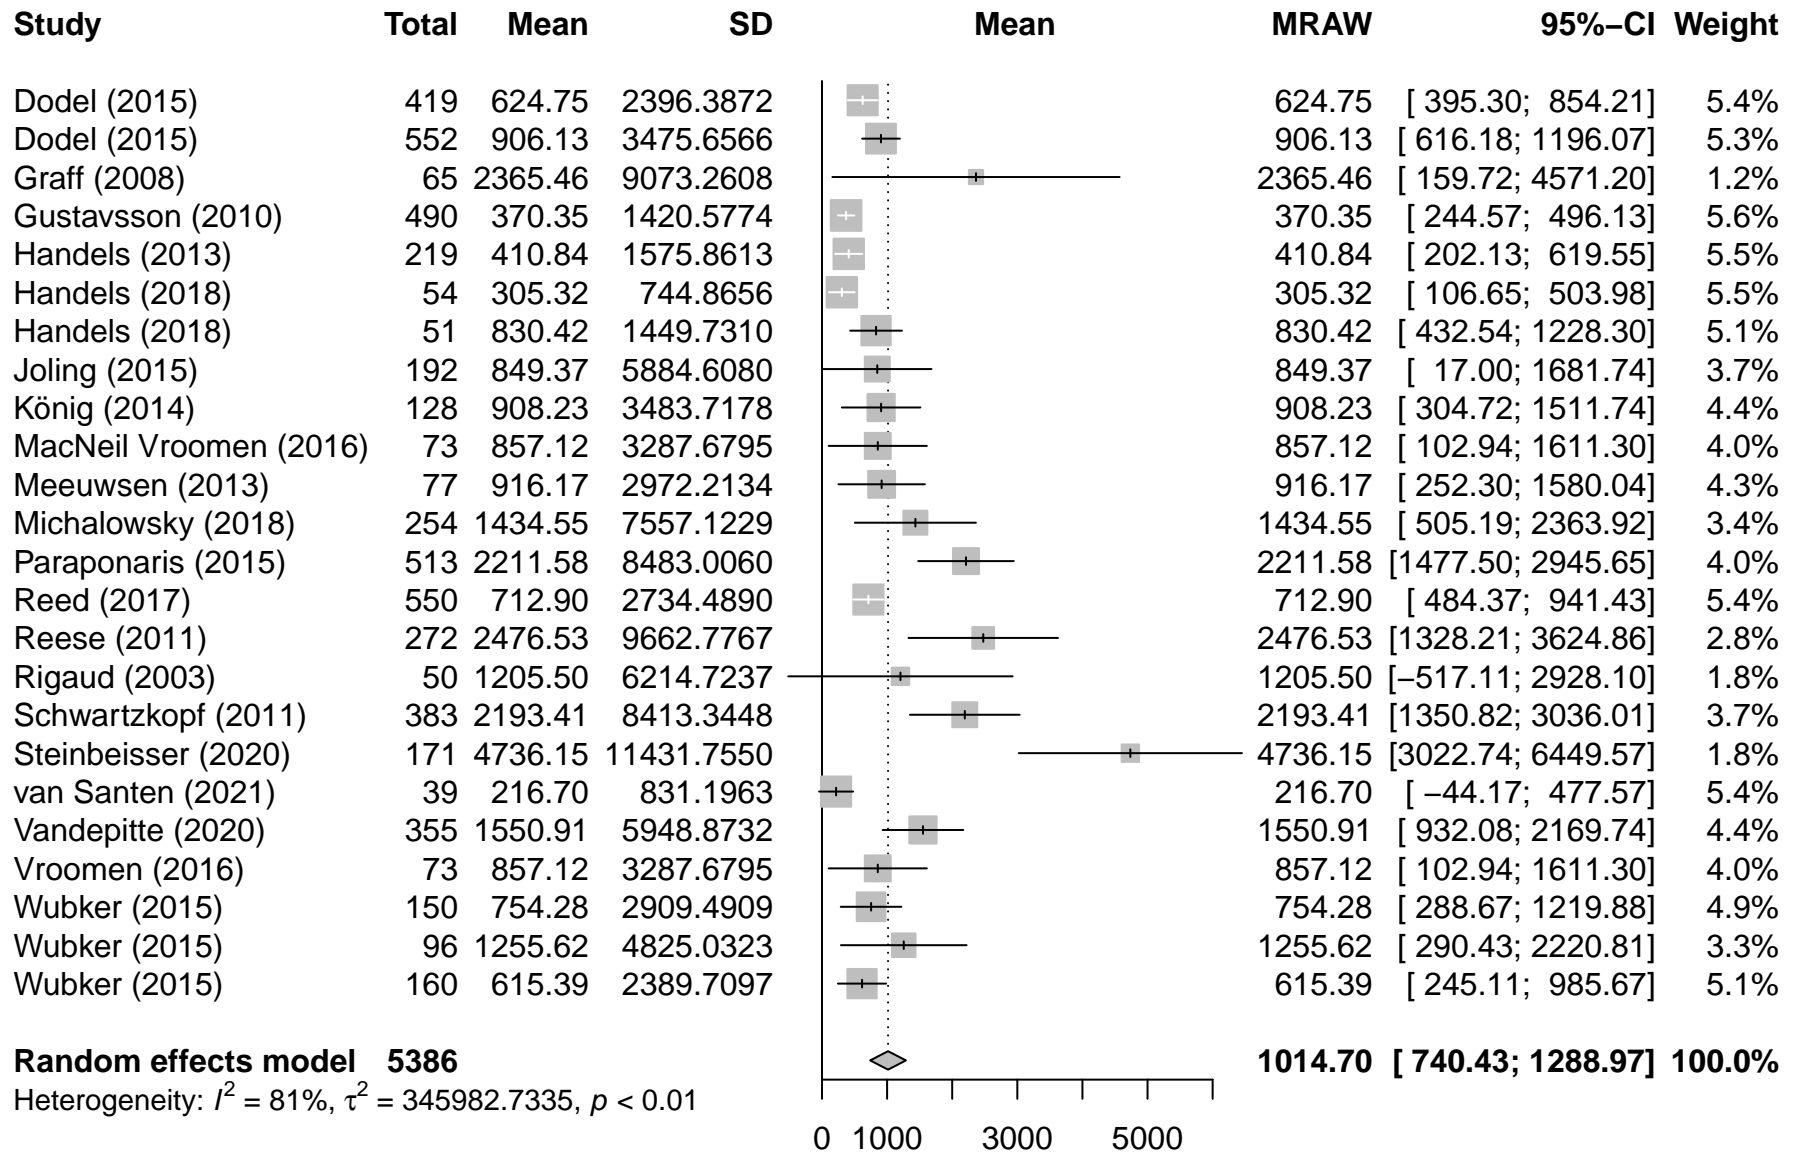

Western Europe, Community, All, Caregiver time

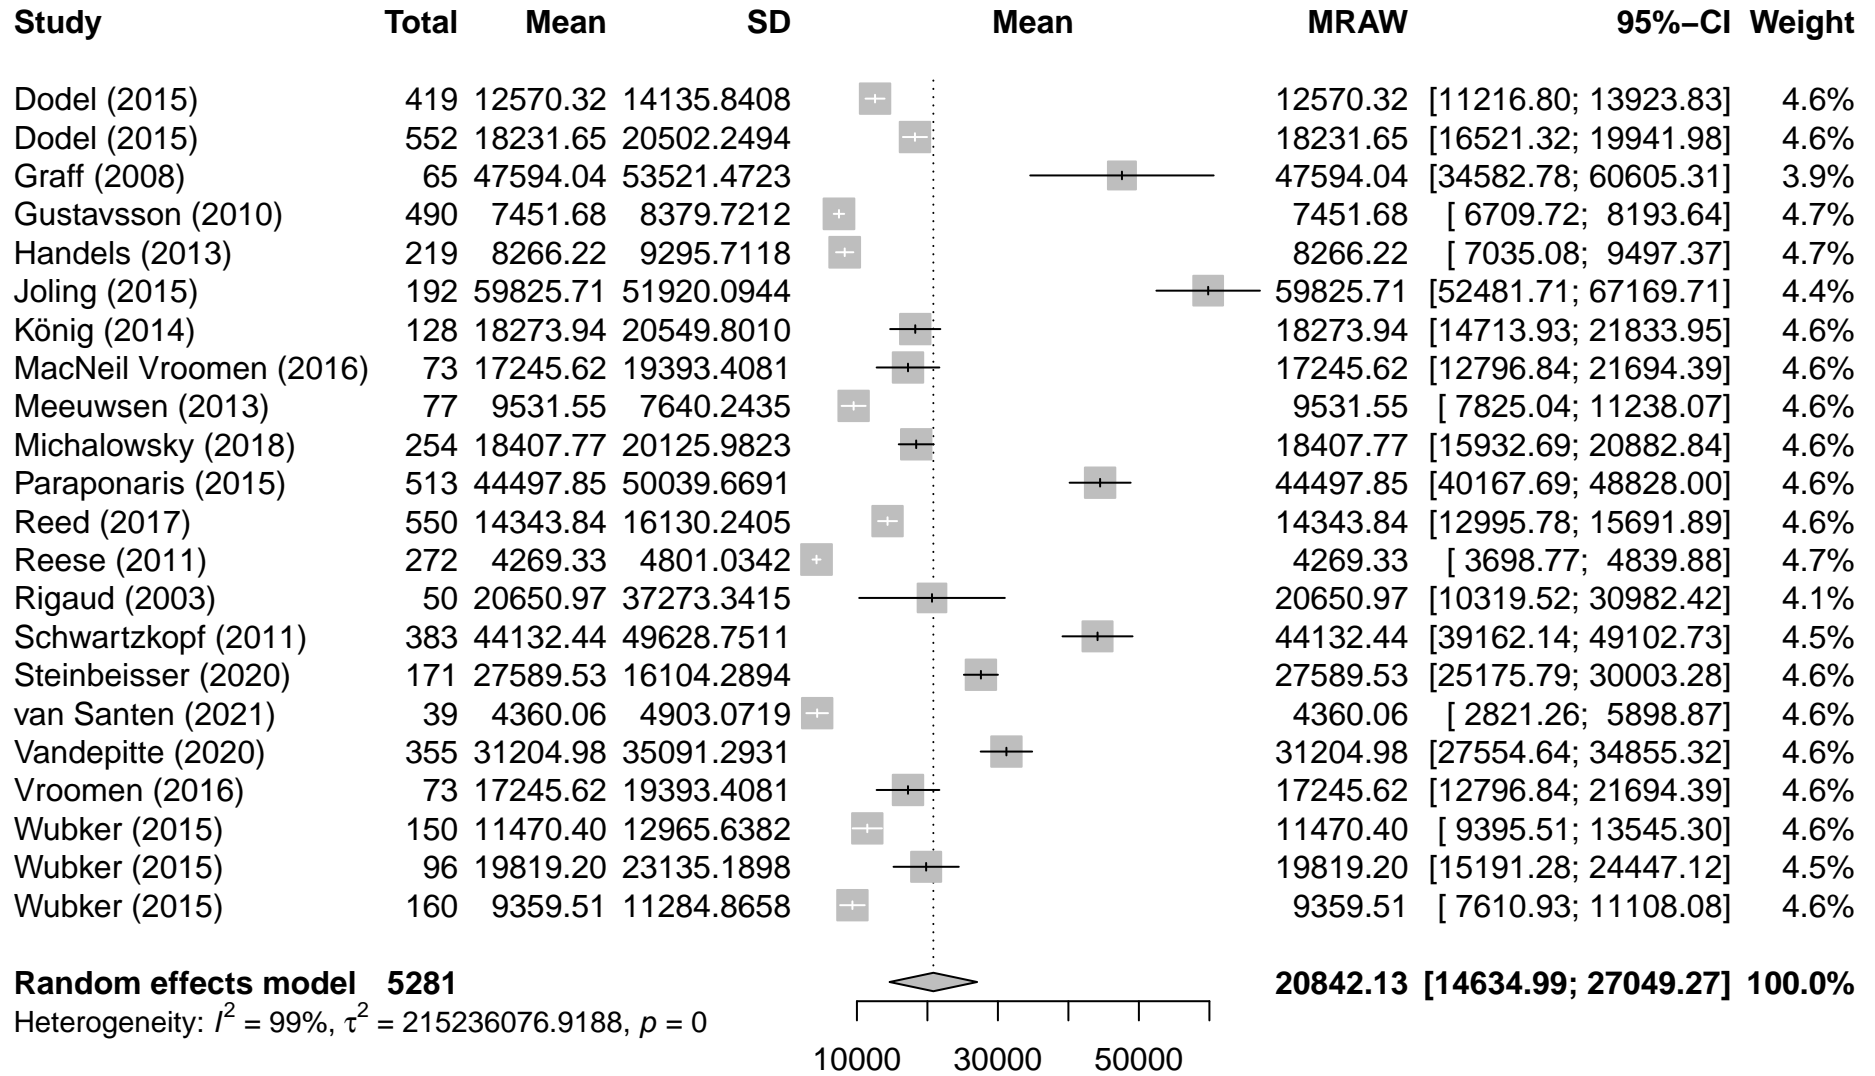

Western Europe, Institution, Mild, Inpatient care

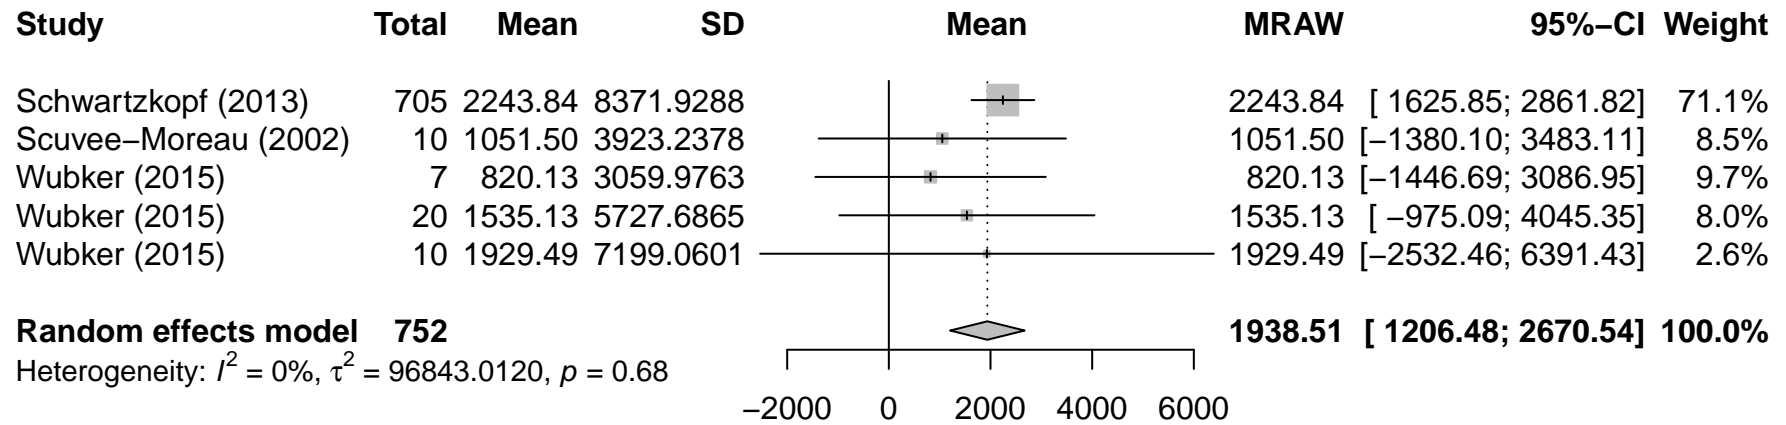

Western Europe, Institution, Mild, Outpatient care

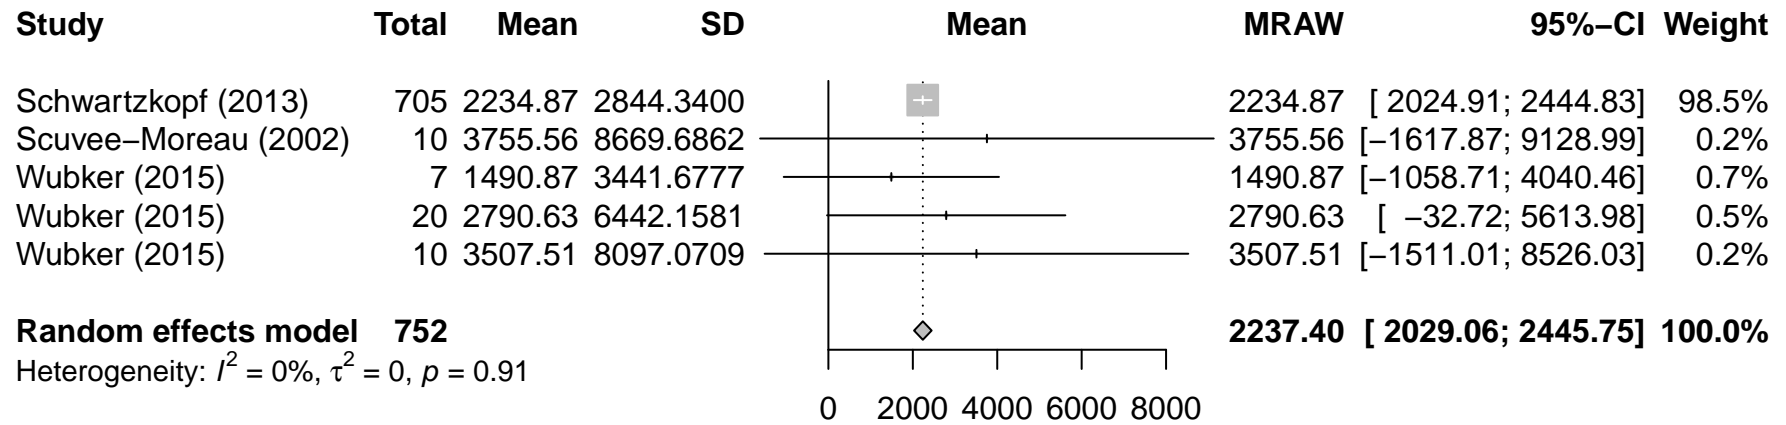

Western Europe, Institution, Mild, Pharmaceuticals

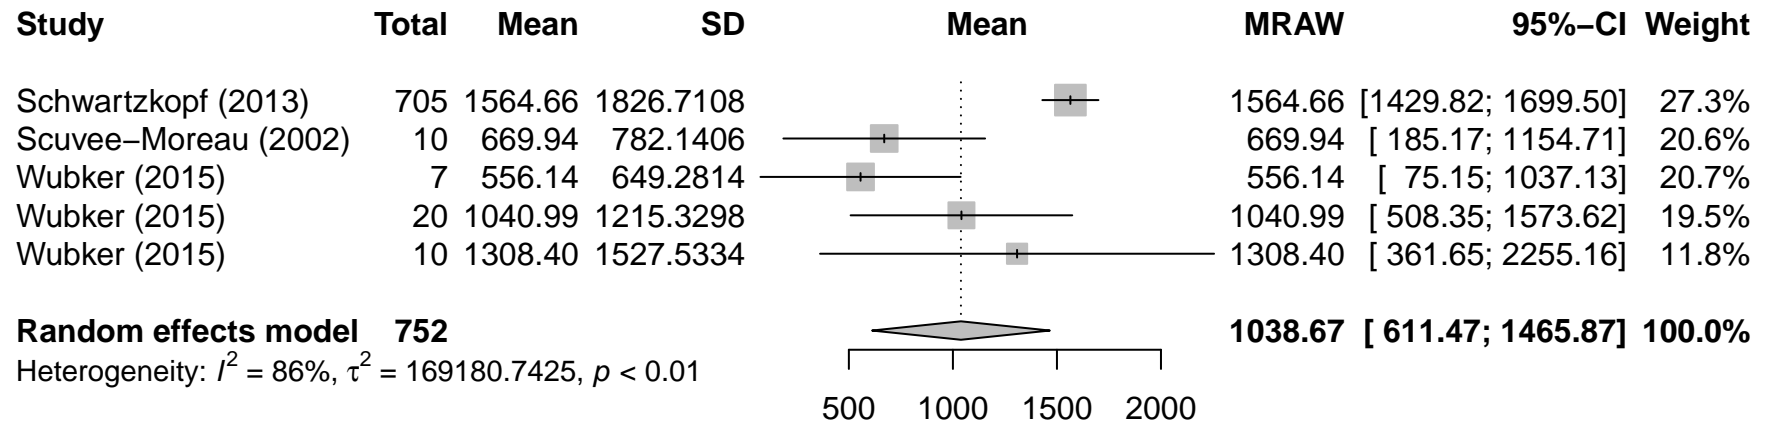

Western Europe, Institution, Mild, Institutional care

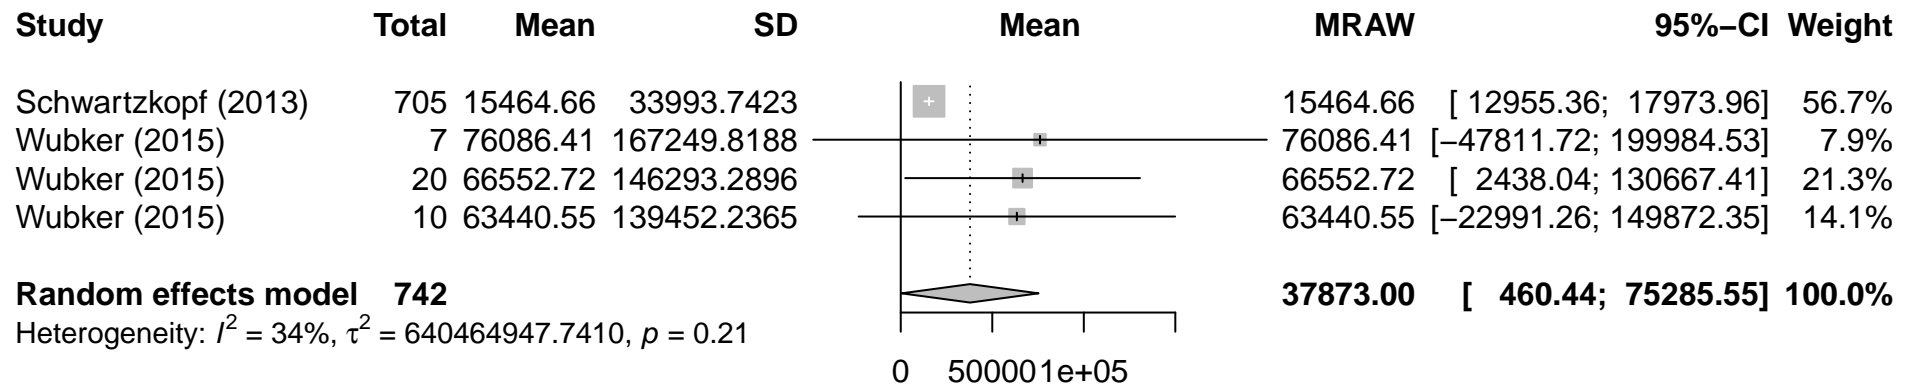



Western Europe, Institution, Mild, Community care

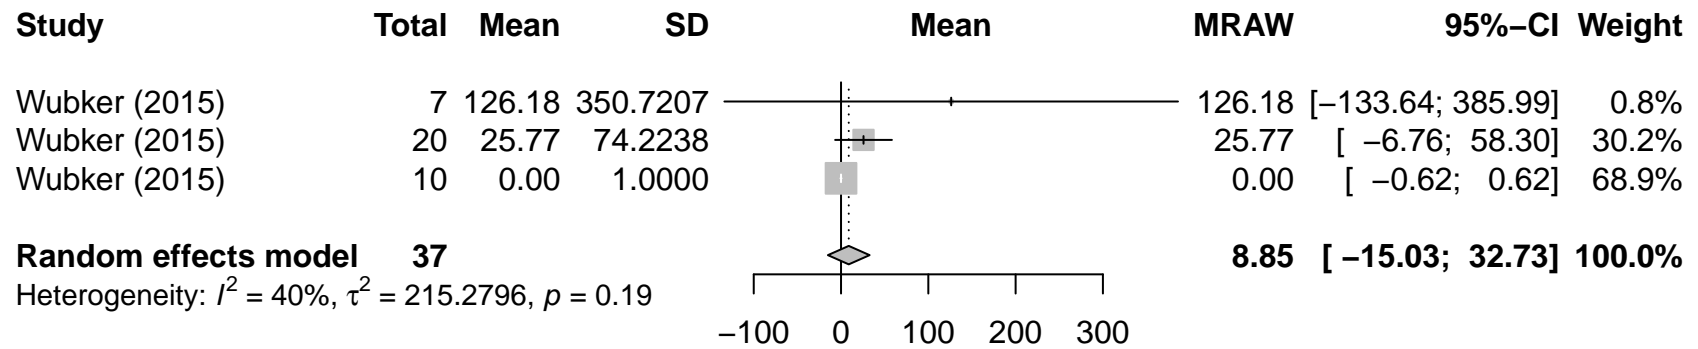

Western Europe, Institution, Mild, Caregiver work loss

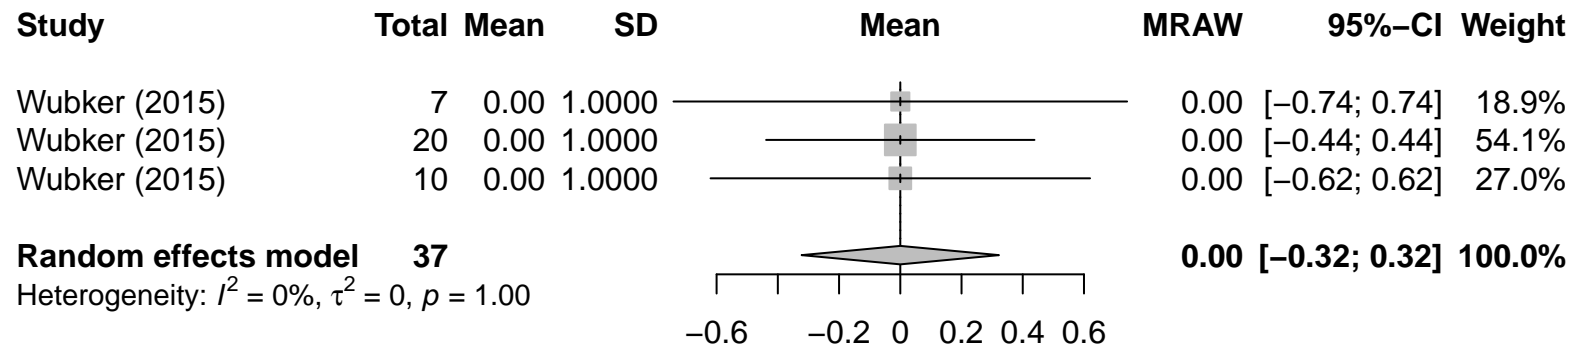

Western Europe, Institution, Mild, Caregiver time



Western Europe, Institution, Moderate, Inpatient care

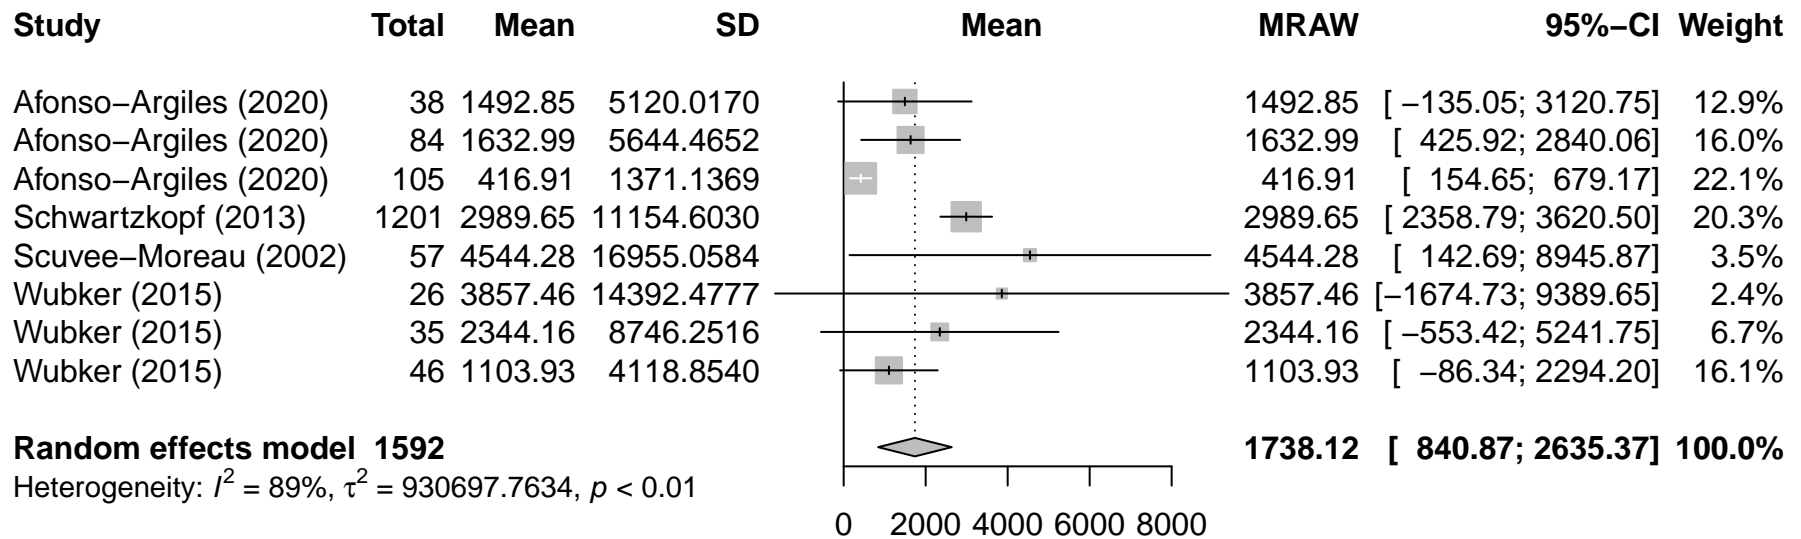

Western Europe, Institution, Moderate, Outpatient care

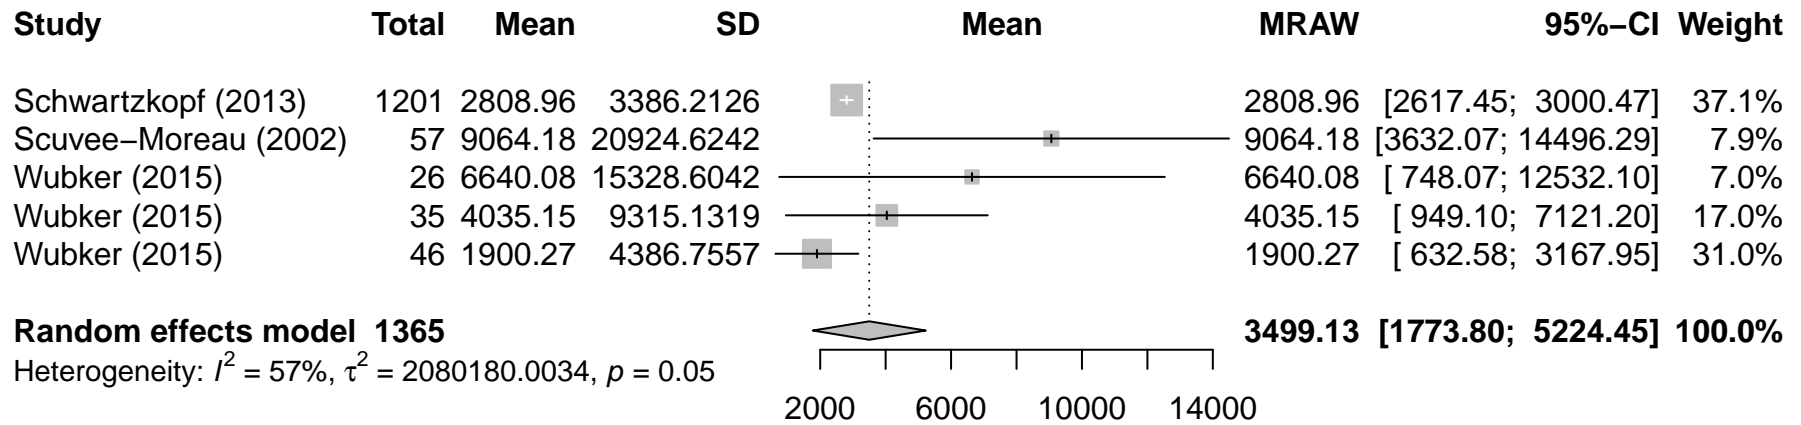

Western Europe, Institution, Moderate, Pharmaceuticals

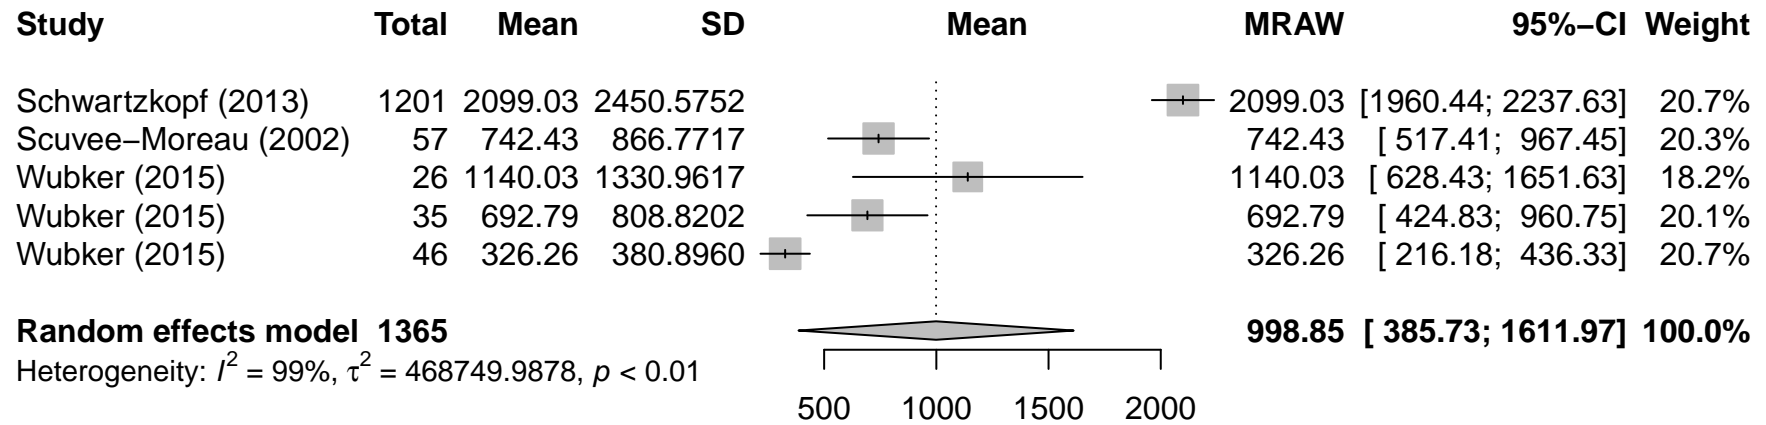

Western Europe, Institution, Moderate, Institutional care

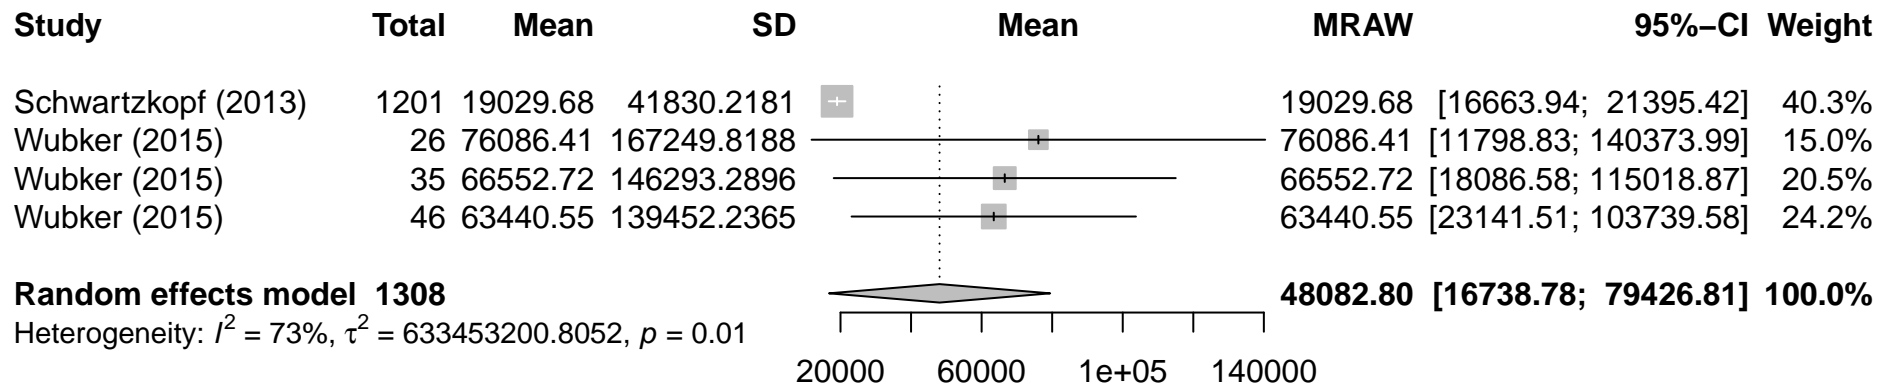

Western Europe, Institution, Moderate, Community care

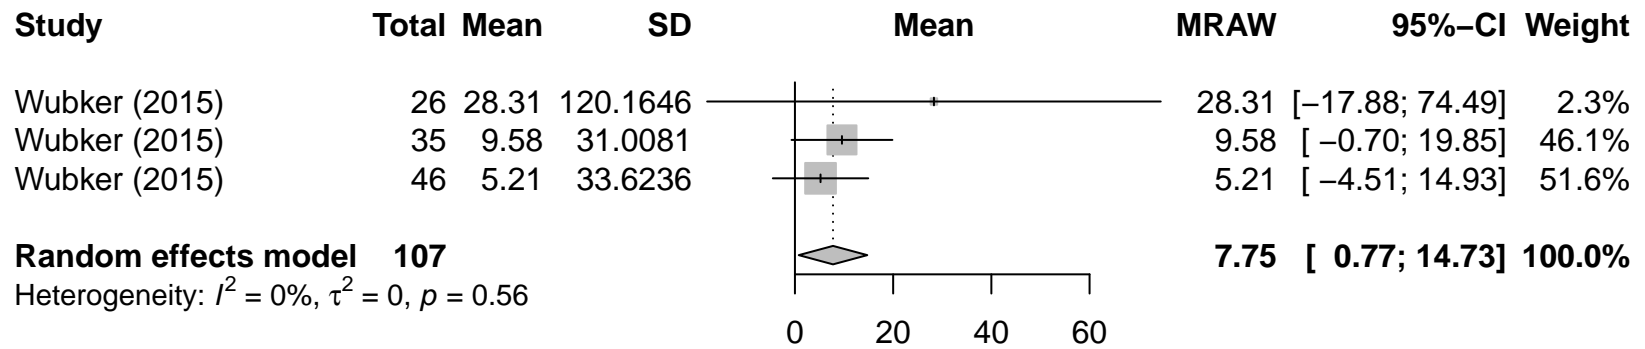



Western Europe, Institution, Moderate, Caregiver work loss

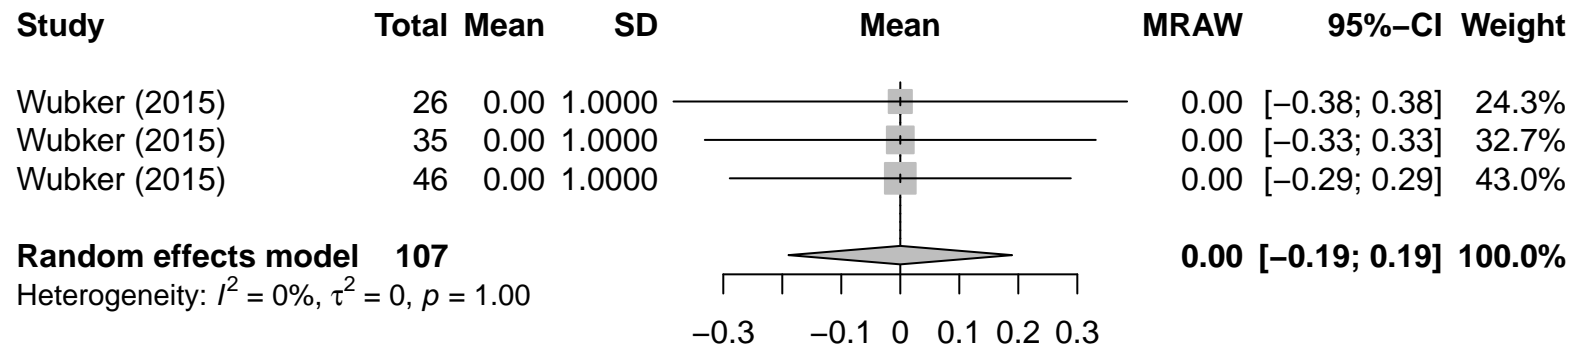

Western Europe, Institution, Moderate, Caregiver time

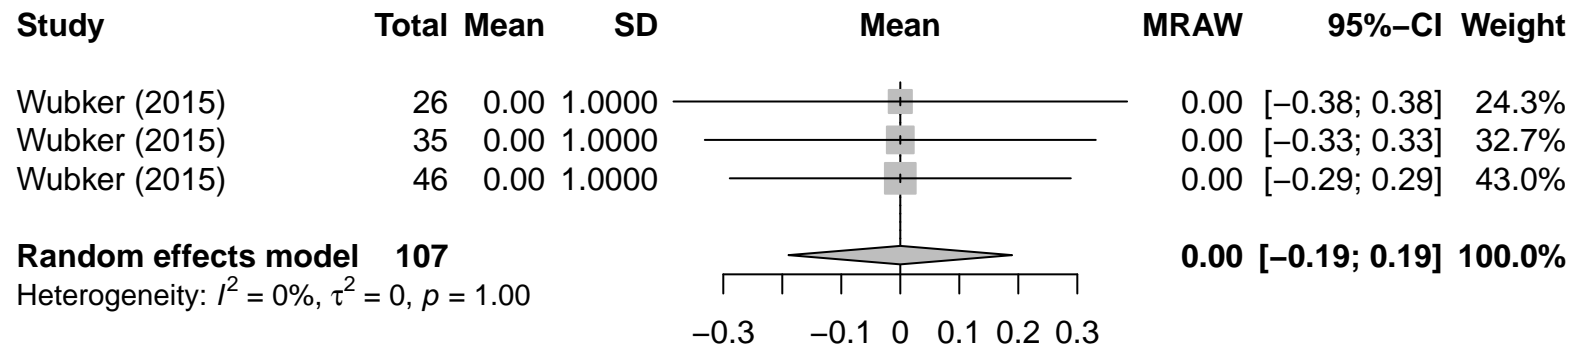

Western Europe, Institution, Severe, Inpatient care

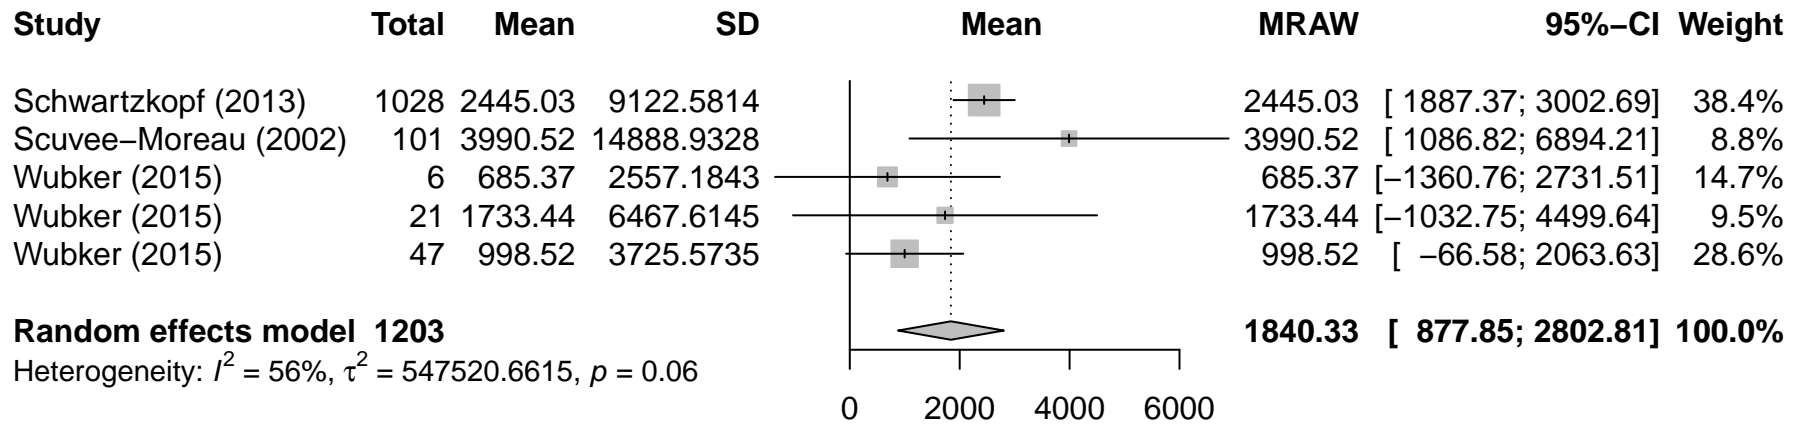

Western Europe, Institution, Severe, Outpatient care

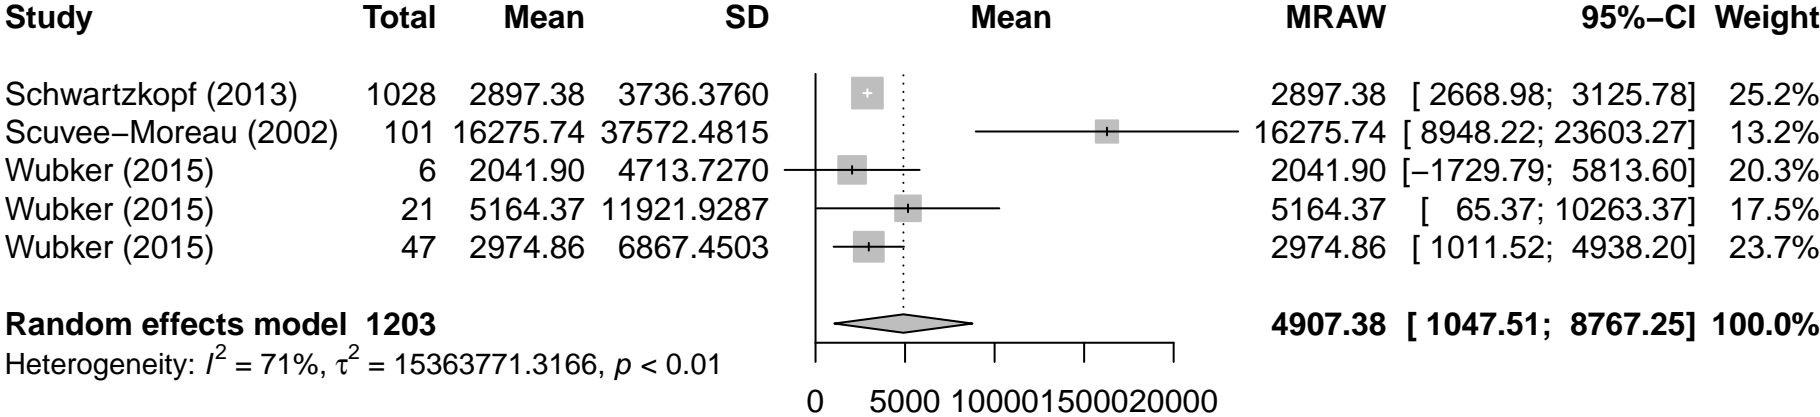

Western Europe, Institution, Severe, Pharmaceuticals

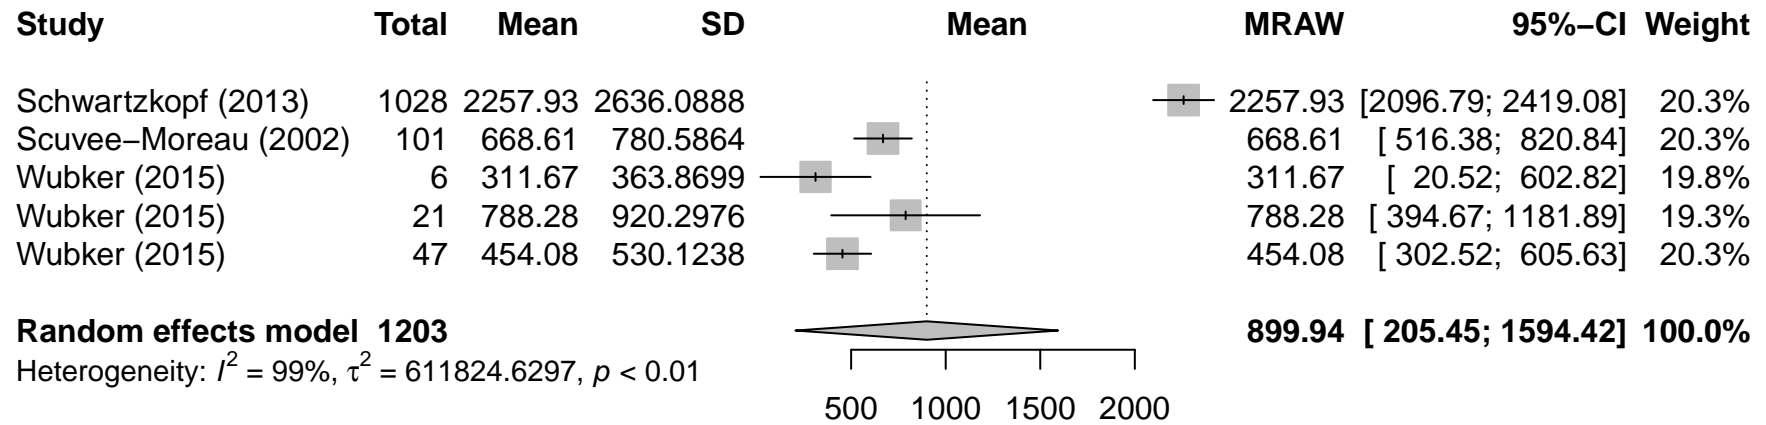

Western Europe, Institution, Severe, Institutional care

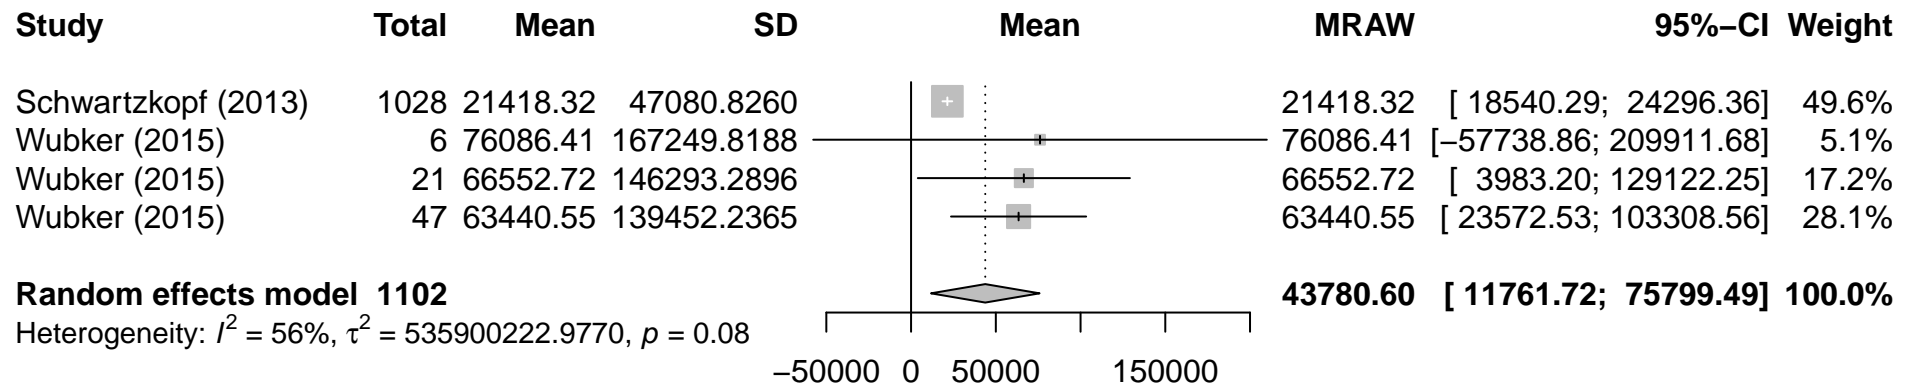

Western Europe, Institution, Severe, Community care

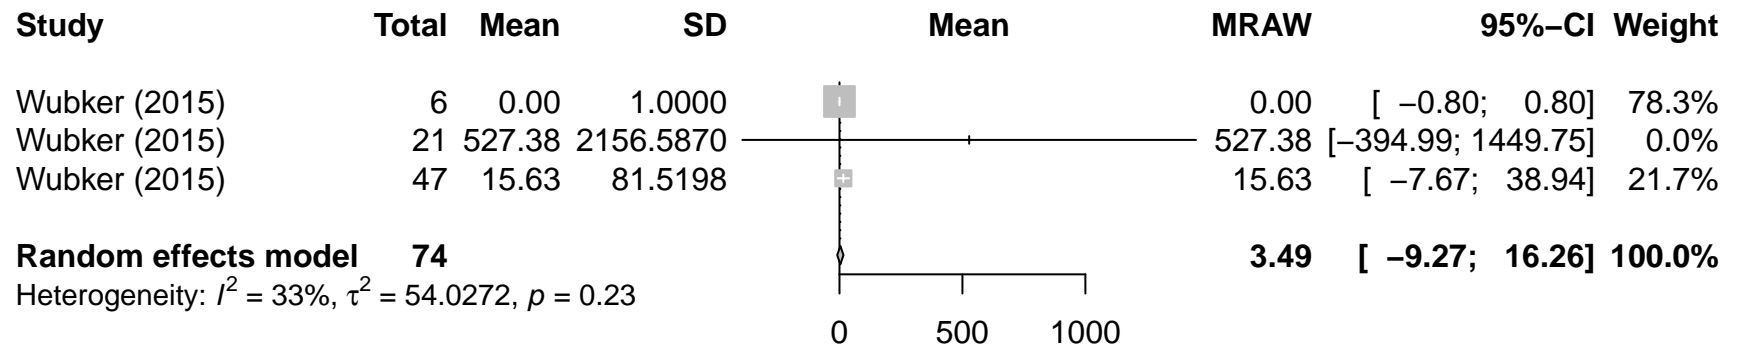

Western Europe, Institution, Severe, Caregiver work loss

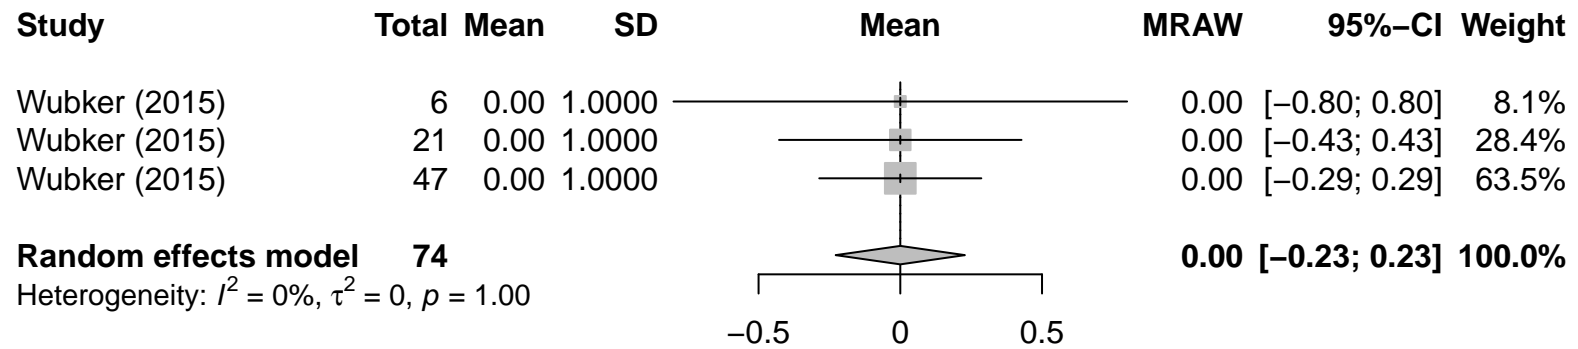



Western Europe, Institution, Severe, Caregiver time



Western Europe, Institution, All, Inpatient care

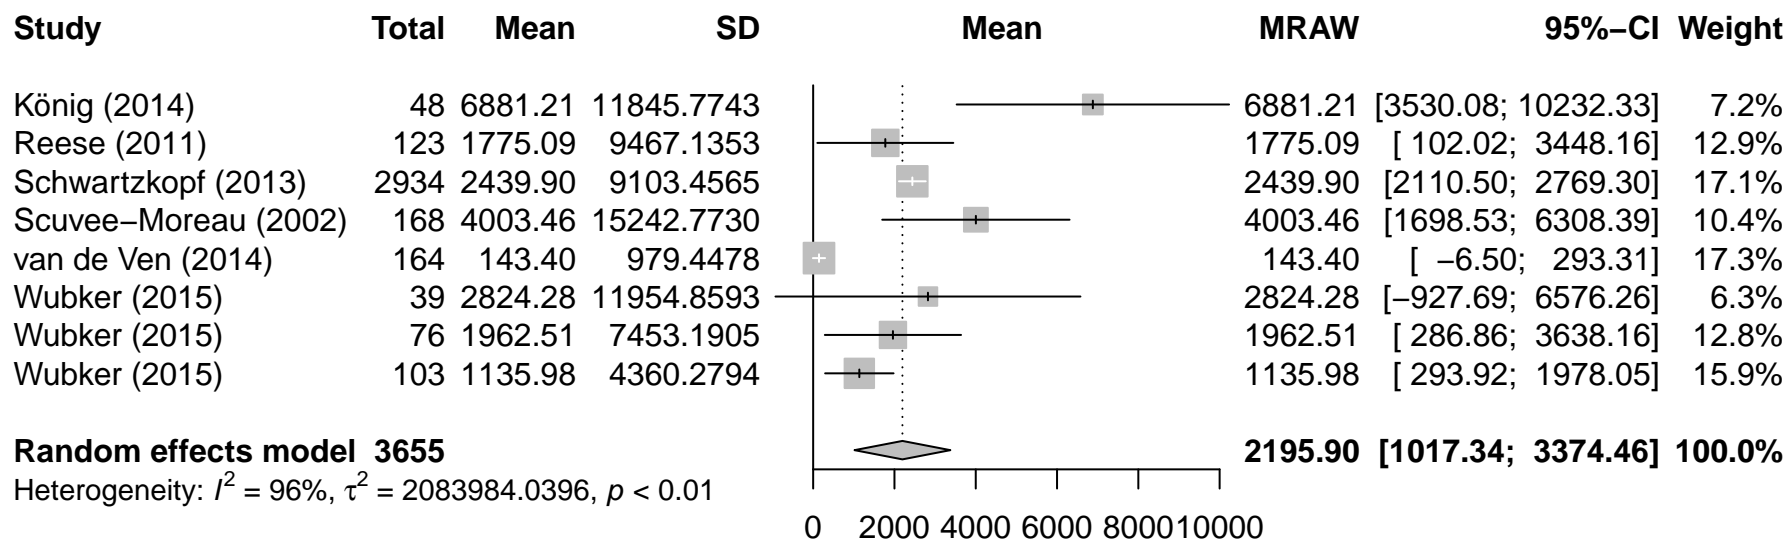

Western Europe, Institution, All, Outpatient care

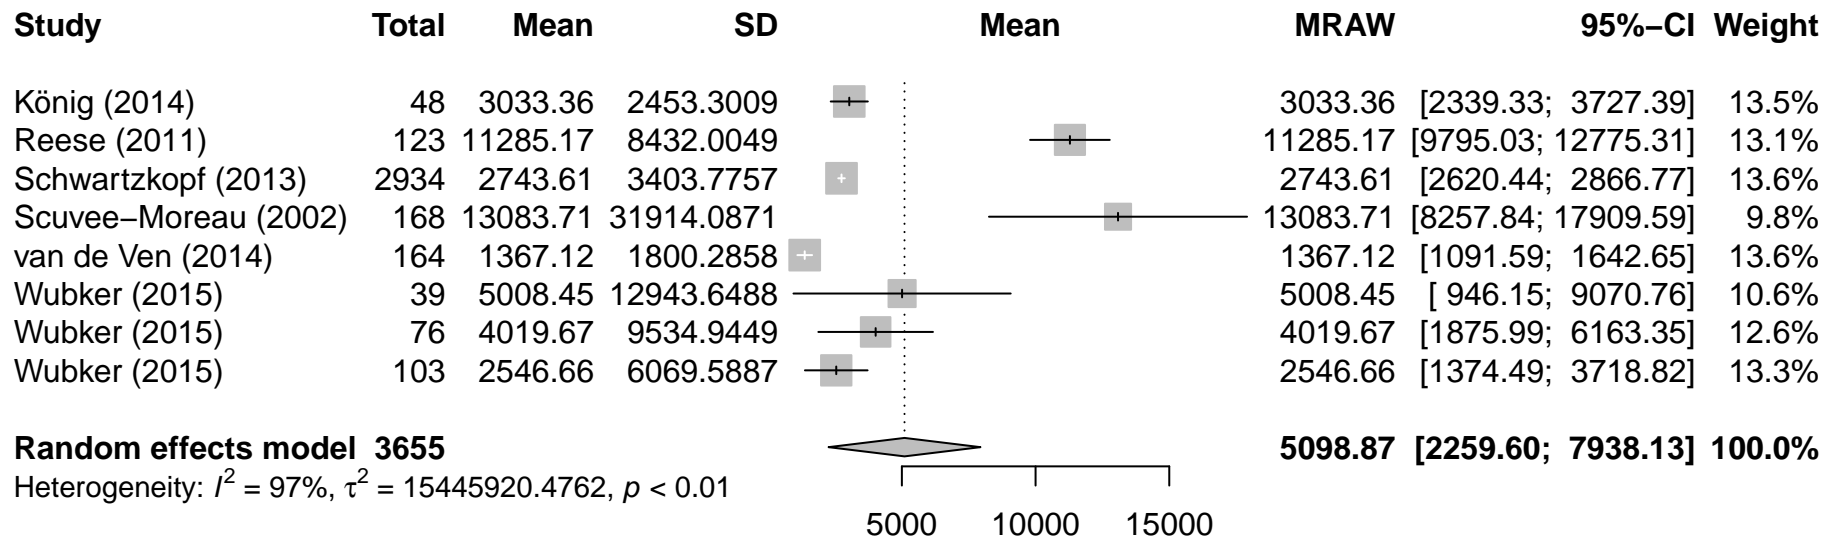

Western Europe, Institution, All, Pharmaceuticals

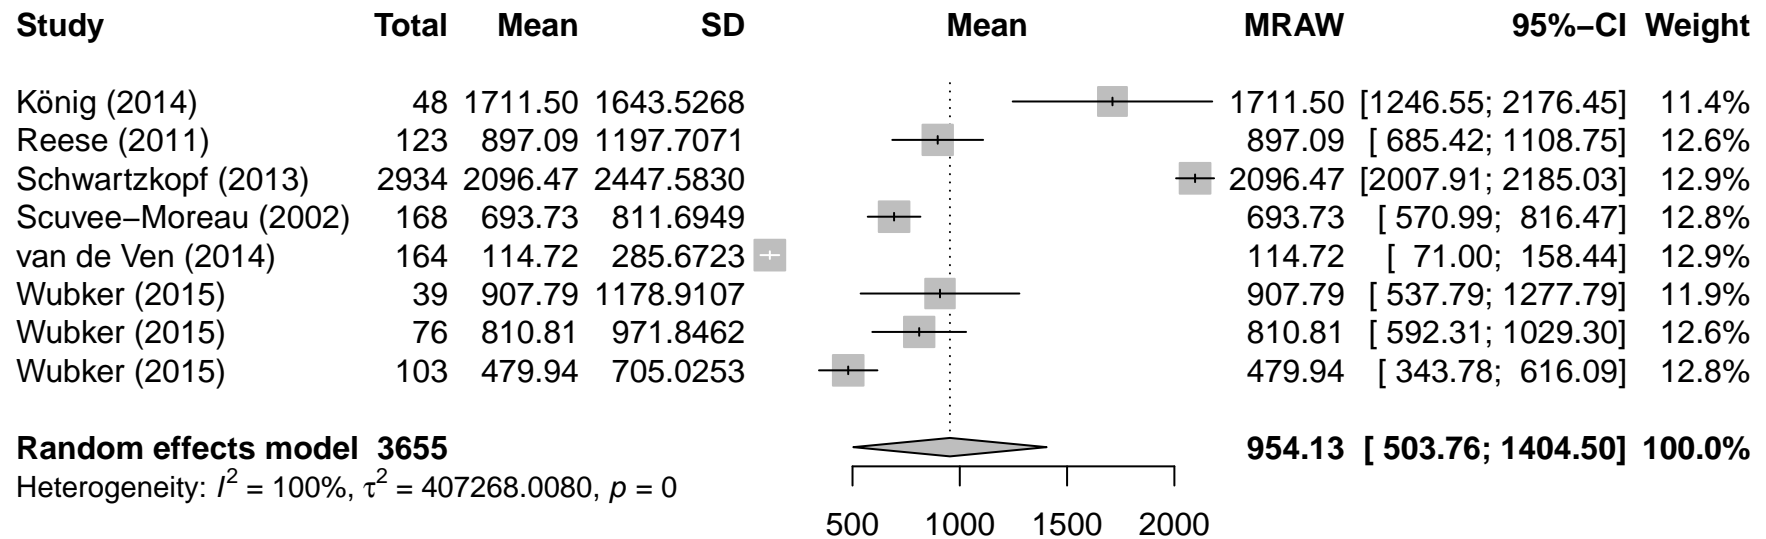

Western Europe, Institution, All, Institutional care

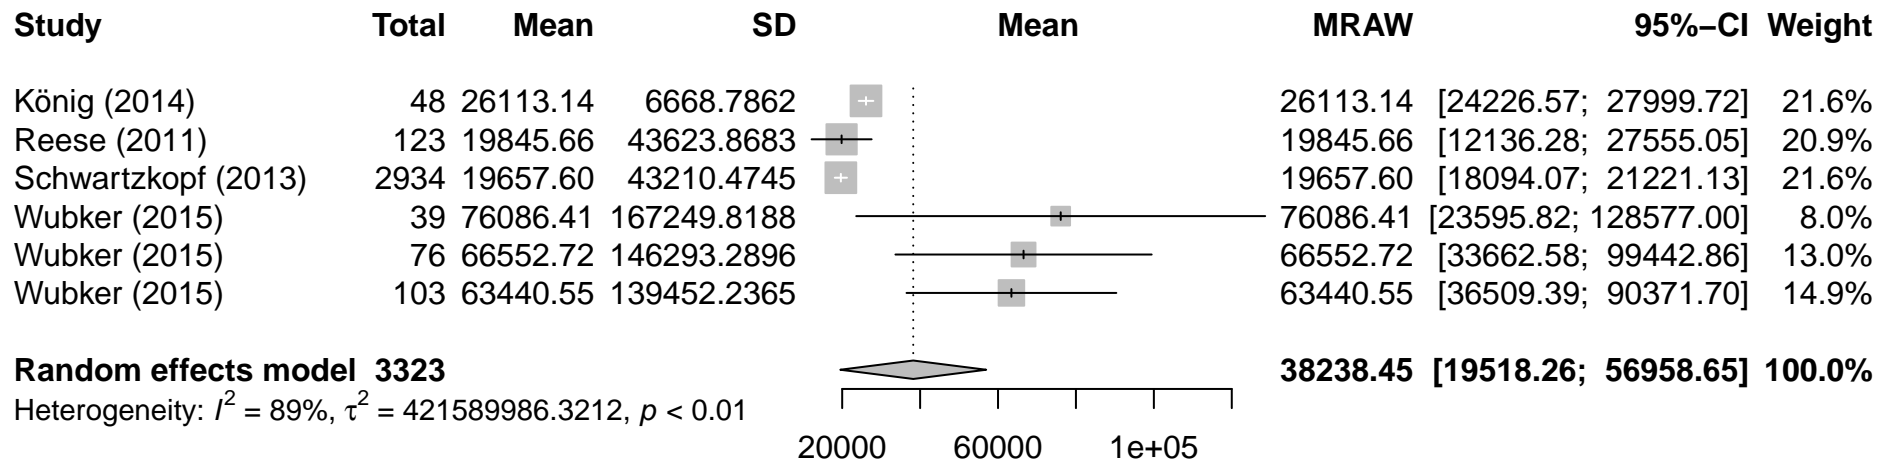

Western Europe, Institution, All, Community care

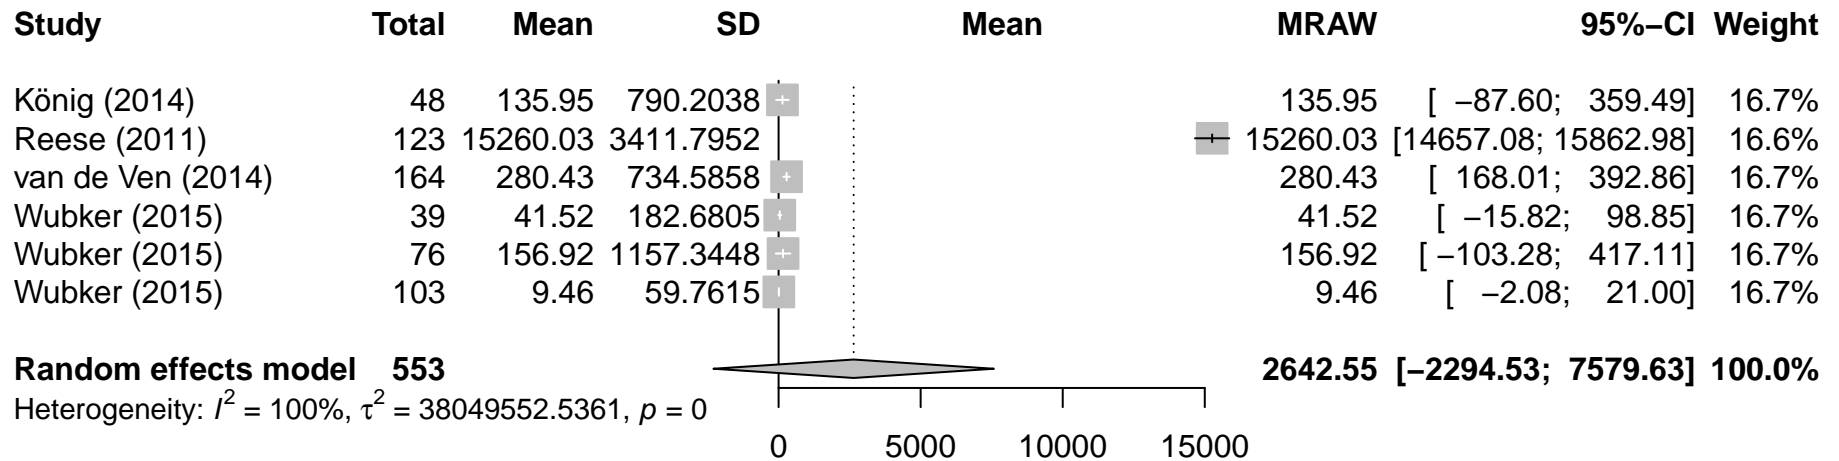

Western Europe, Institution, All, Caregiver work loss

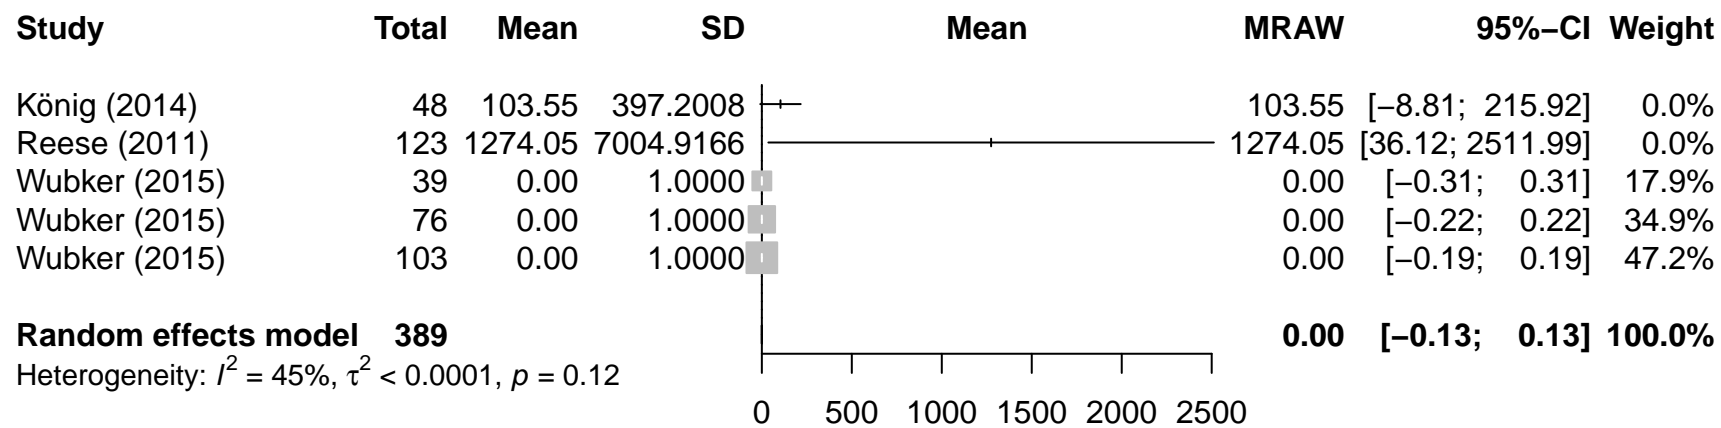

Western Europe, Institution, All, Caregiver time

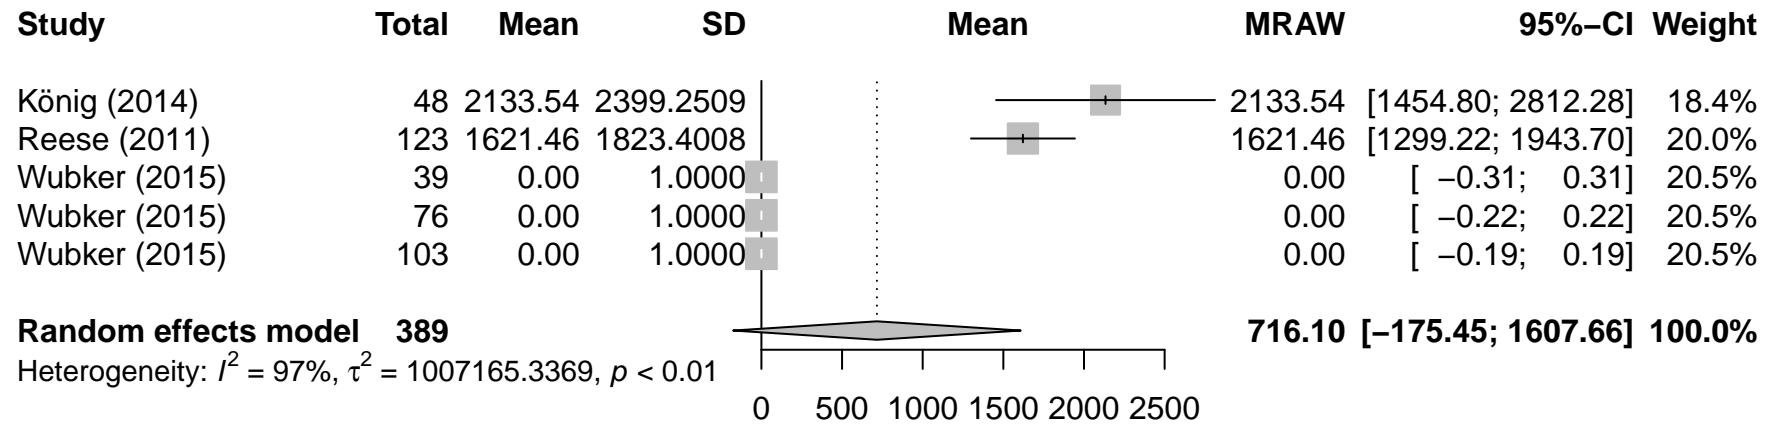



Western Europe, All, Mild, Inpatient care

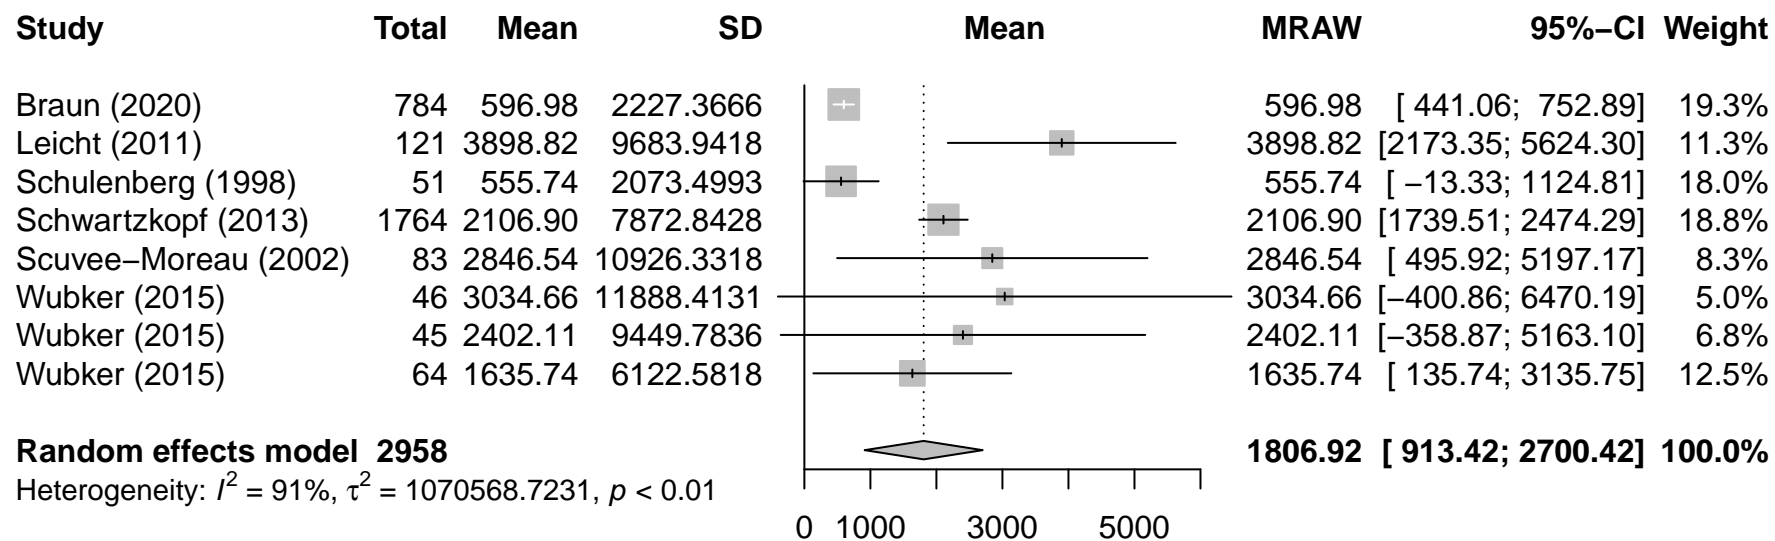

Western Europe, All, Mild, Outpatient care

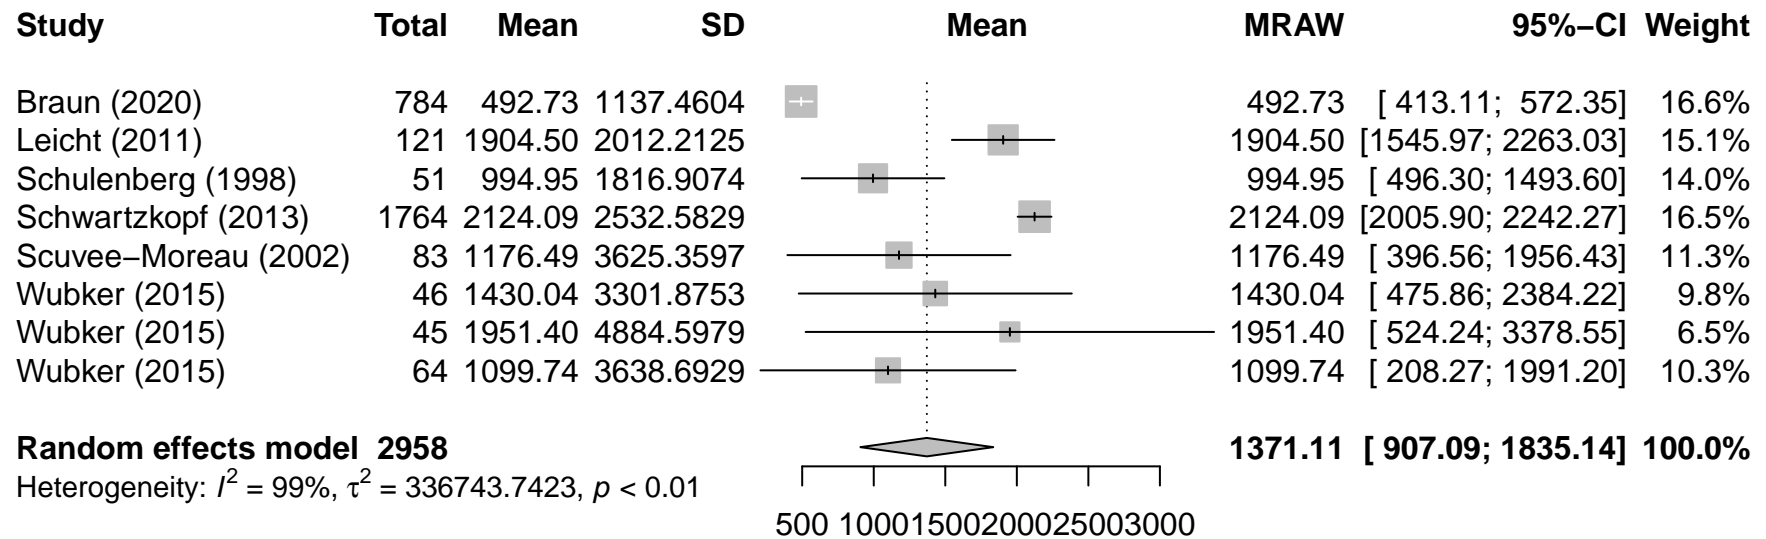

Western Europe, All, Mild, Pharmaceuticals

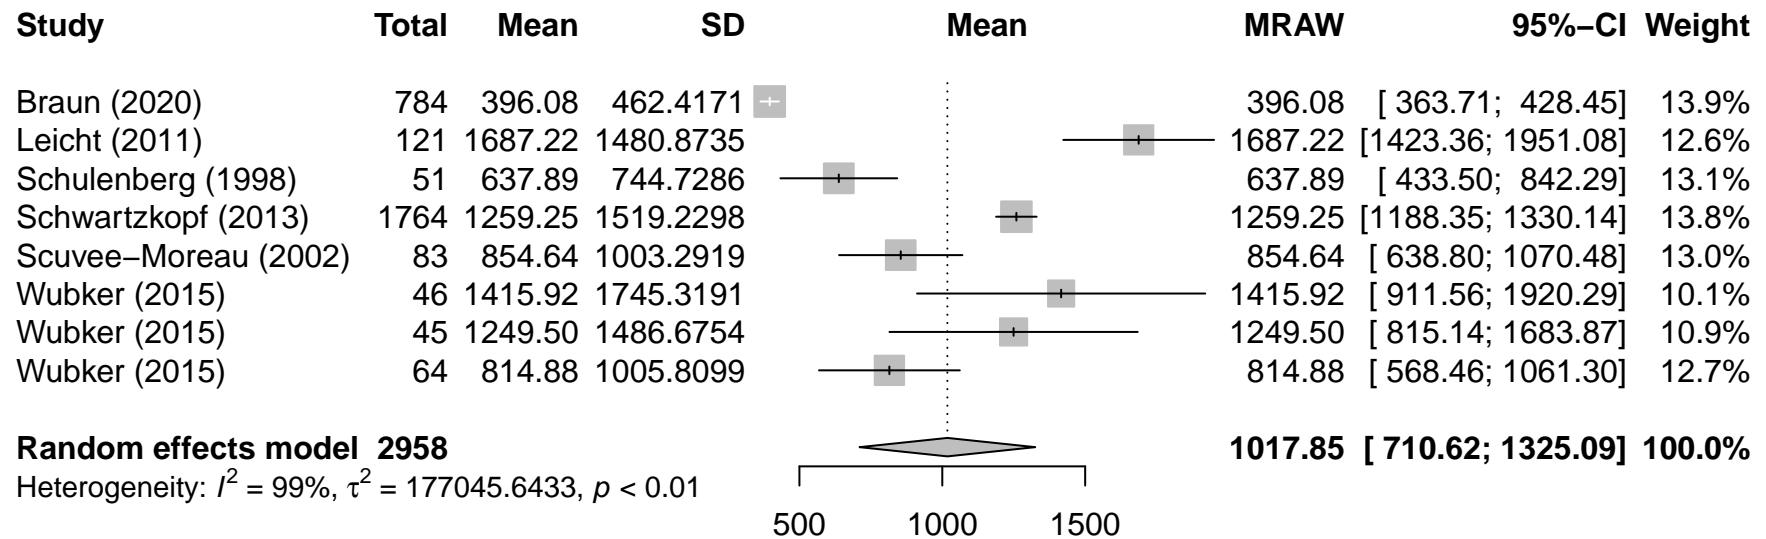

Western Europe, All, Mild, Institutional care

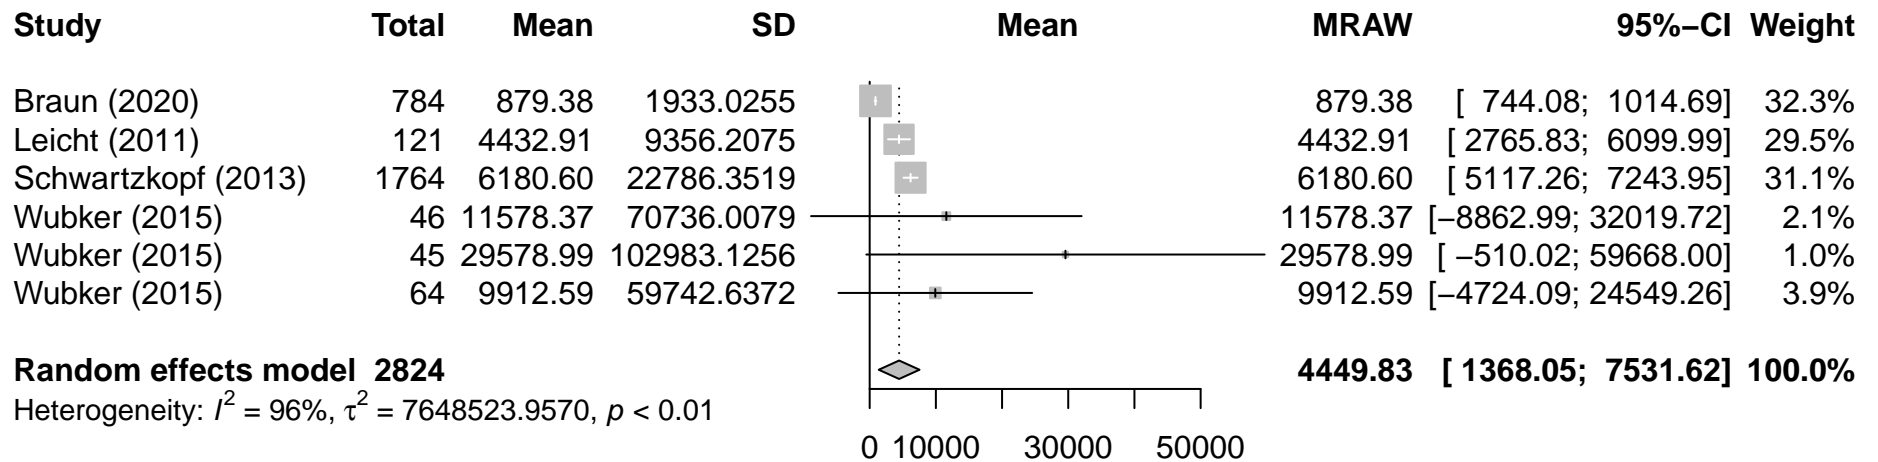

Western Europe, All, Mild, Community care

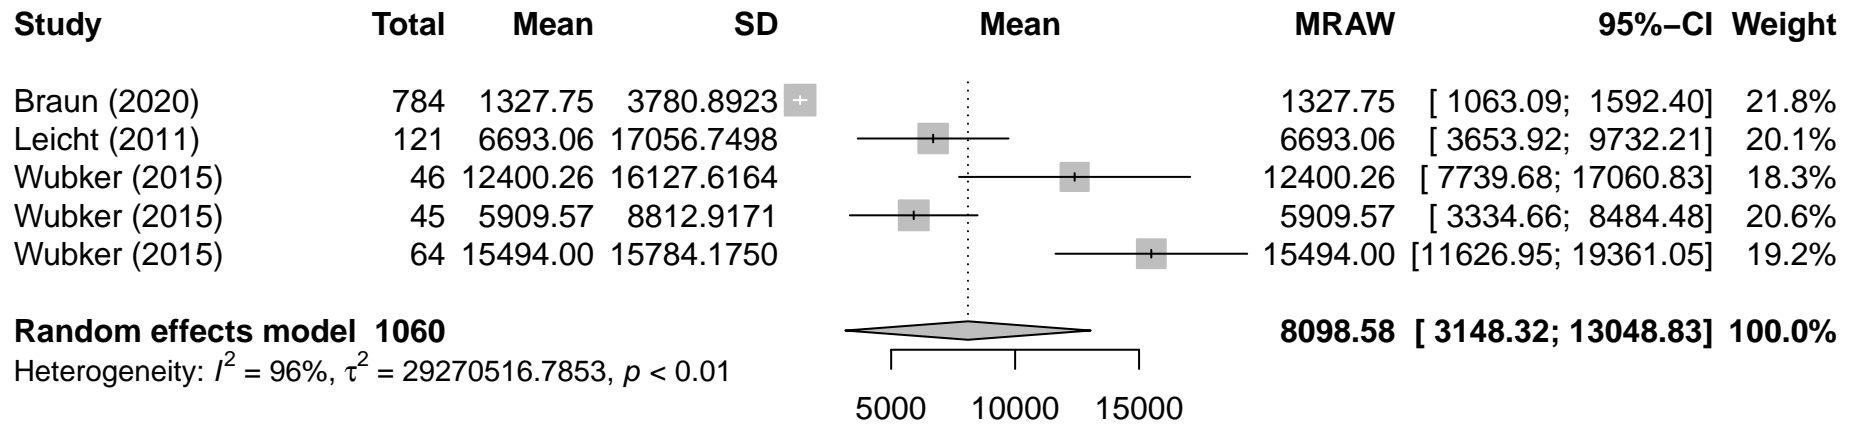

Western Europe, All, Mild, Caregiver work loss

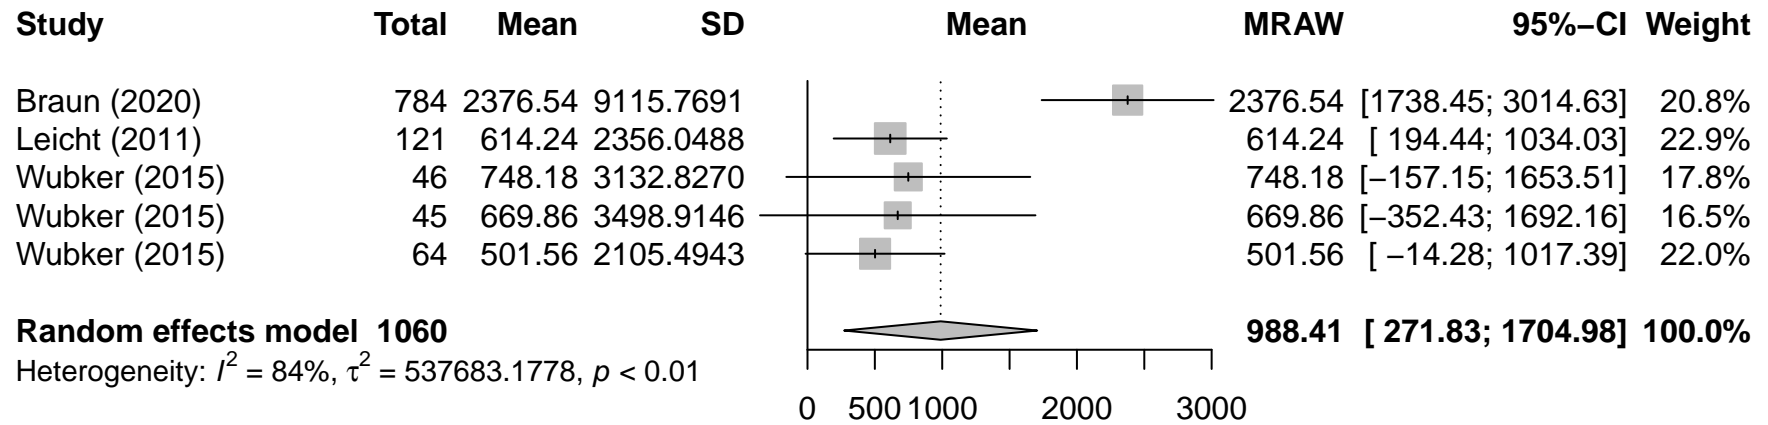

Western Europe, All, Mild, Caregiver time

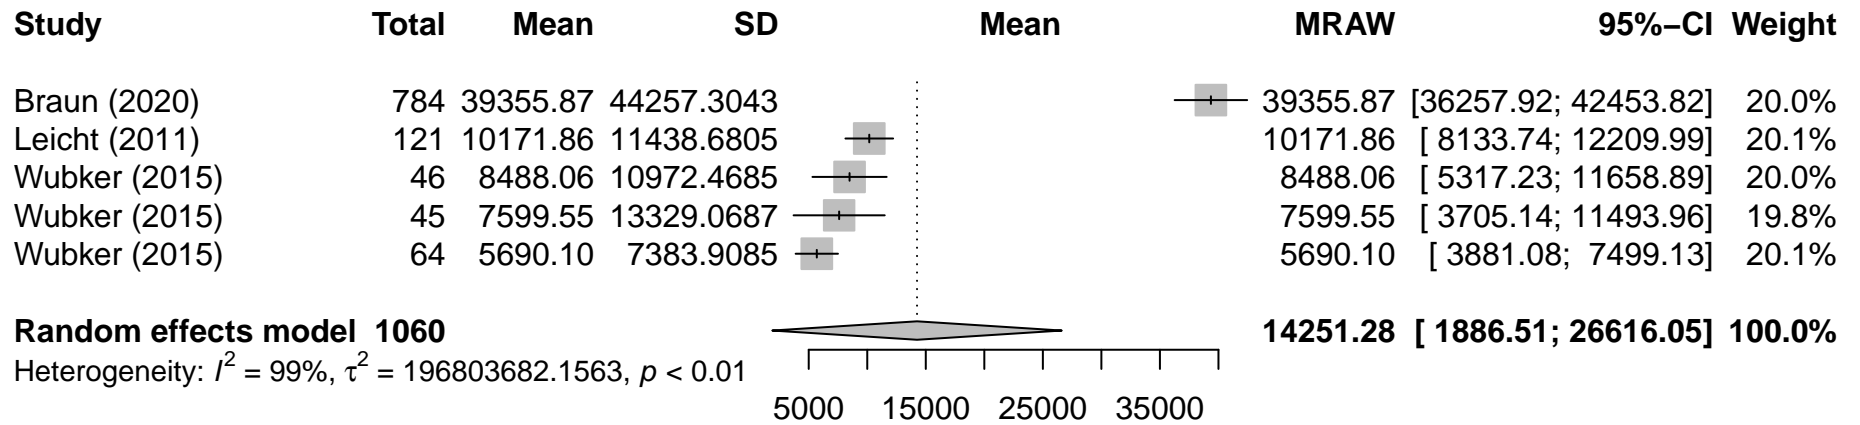

Western Europe, All, Moderate, Inpatient care

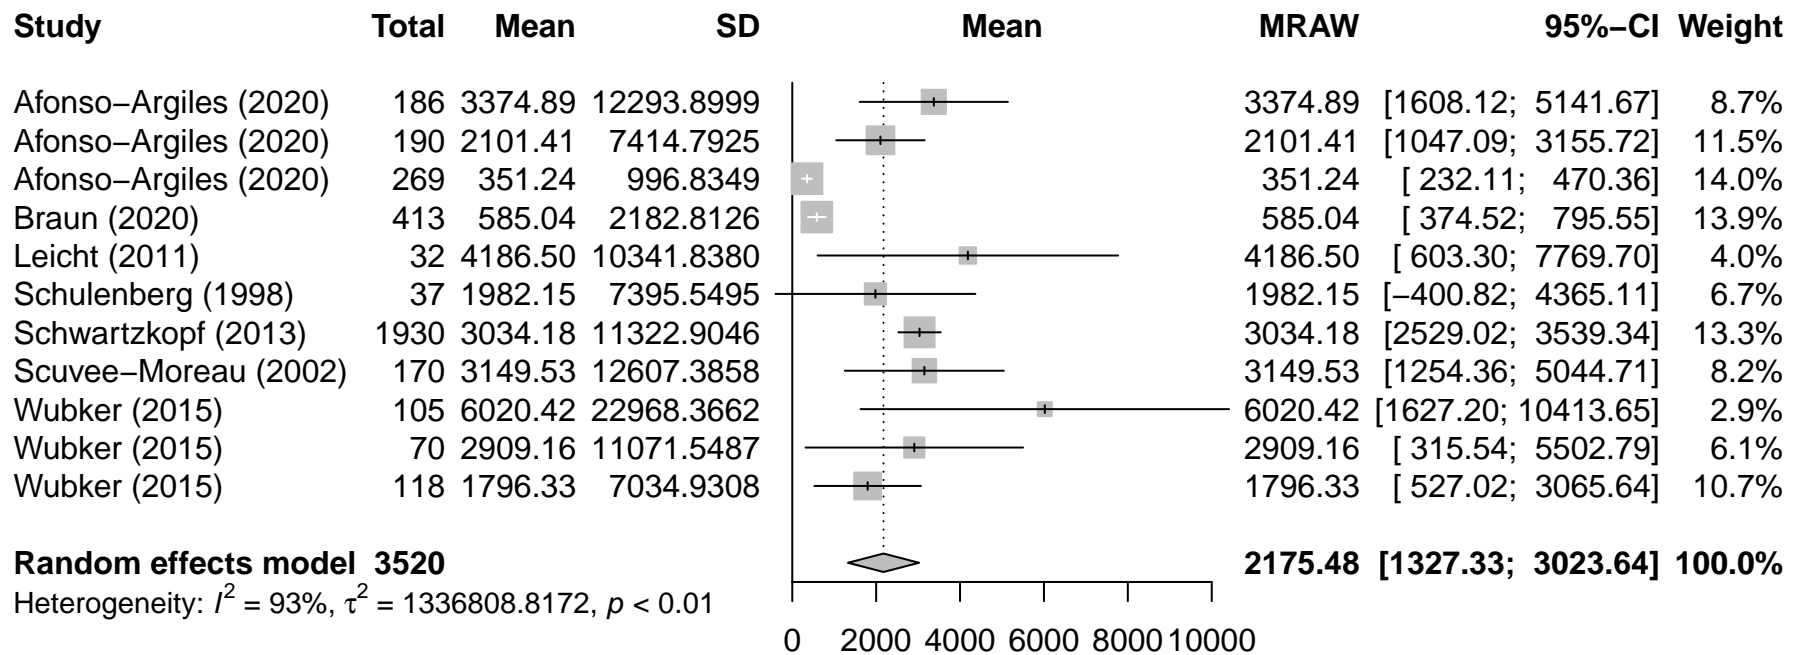



Western Europe, All, Moderate, Outpatient care

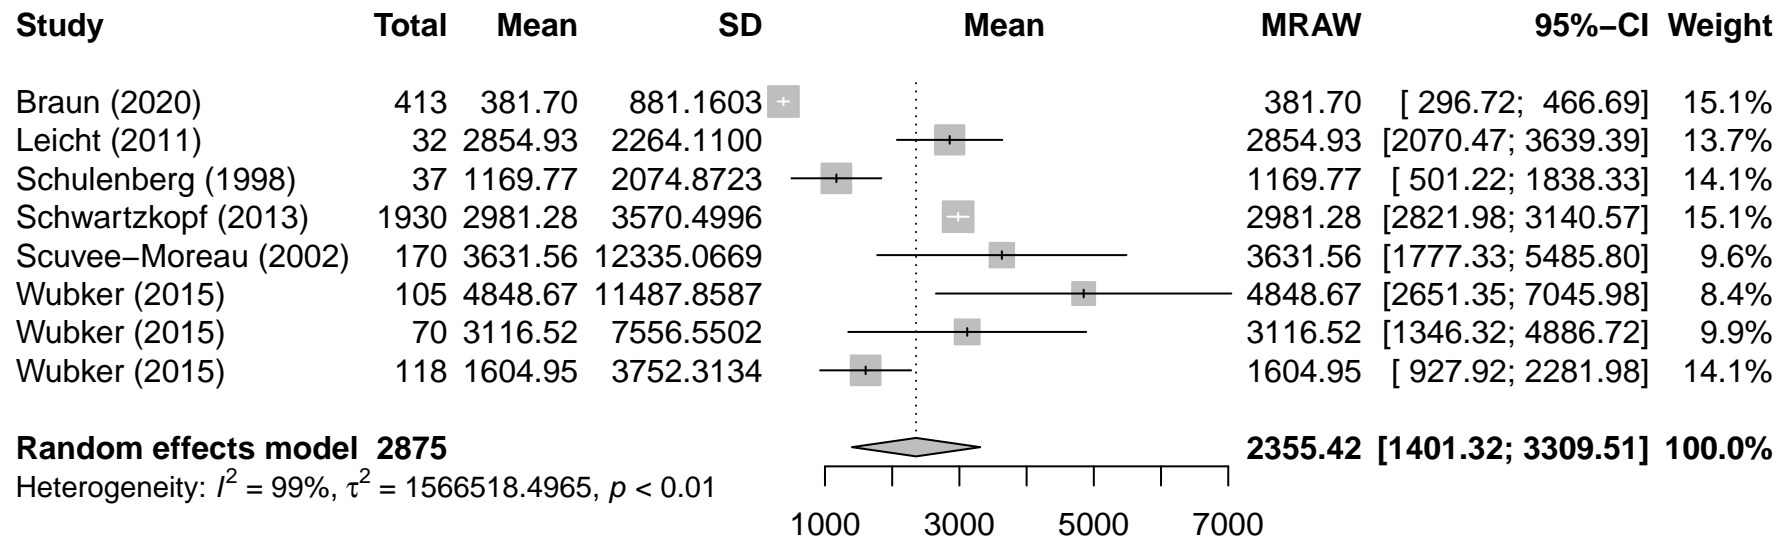

Western Europe, All, Moderate, Pharmaceuticals

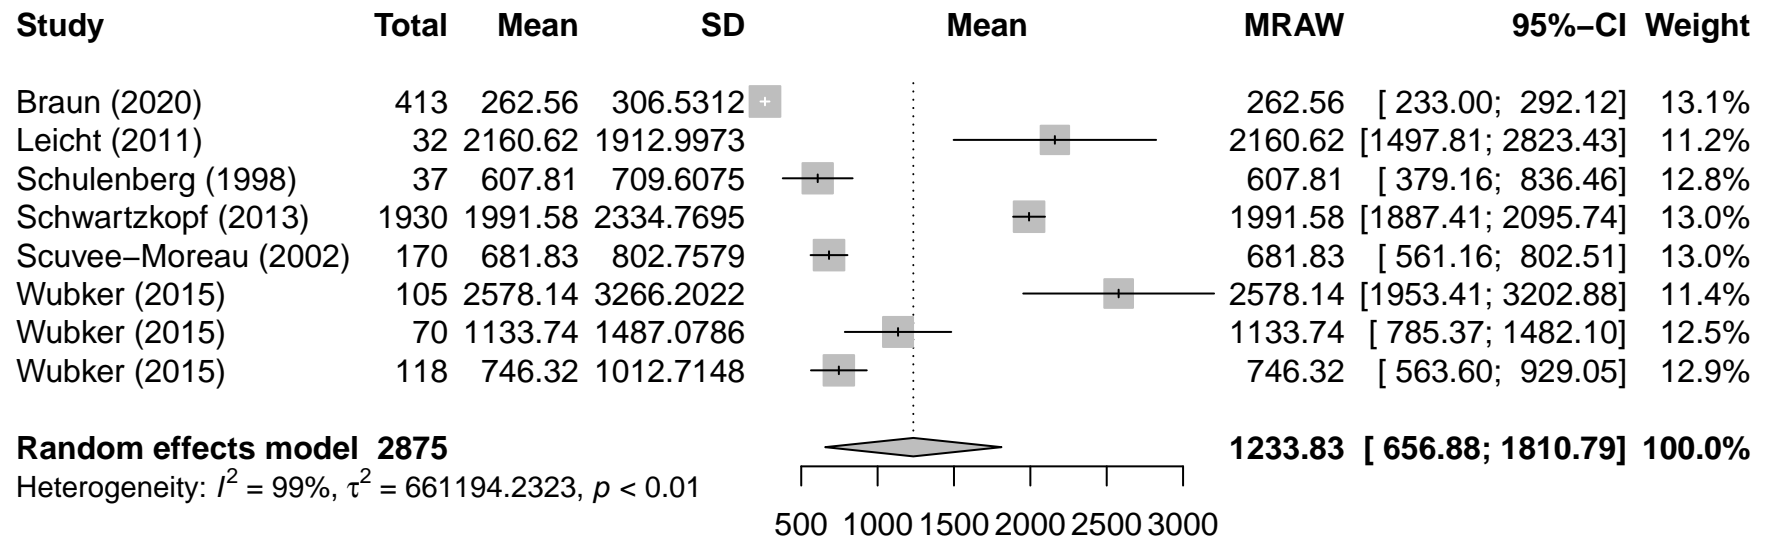

Western Europe, All, Moderate, Institutional care

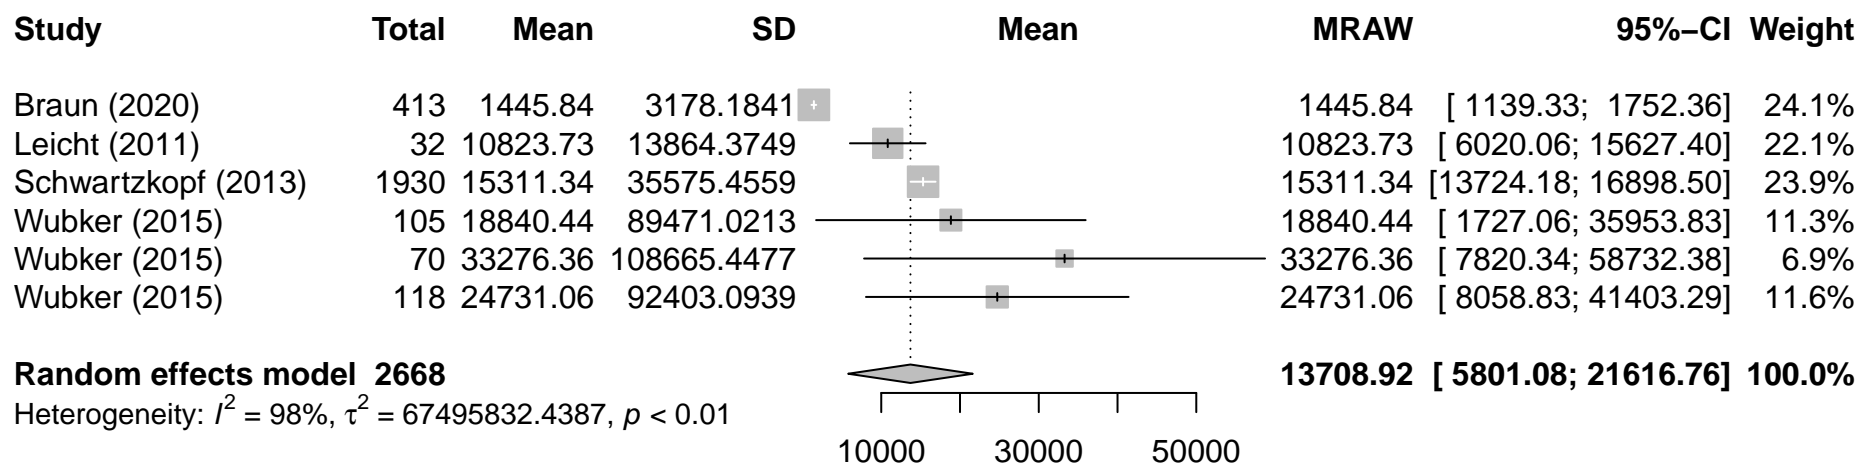

Western Europe, All, Moderate, Community care

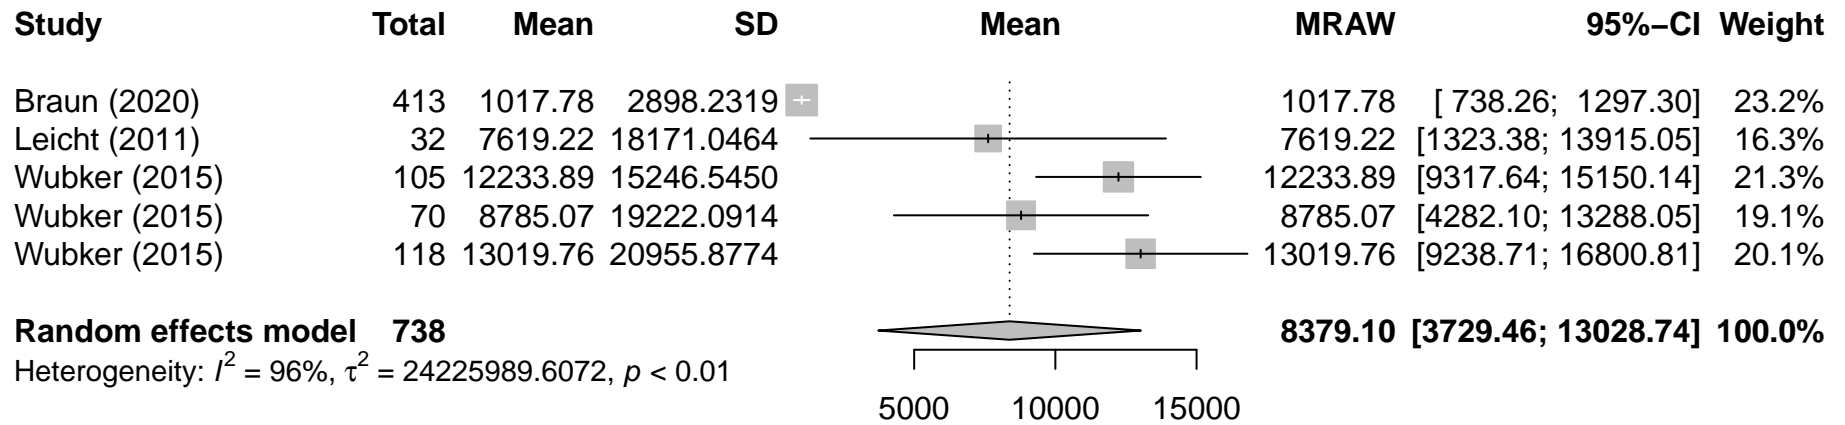

Western Europe, All, Moderate, Caregiver work loss

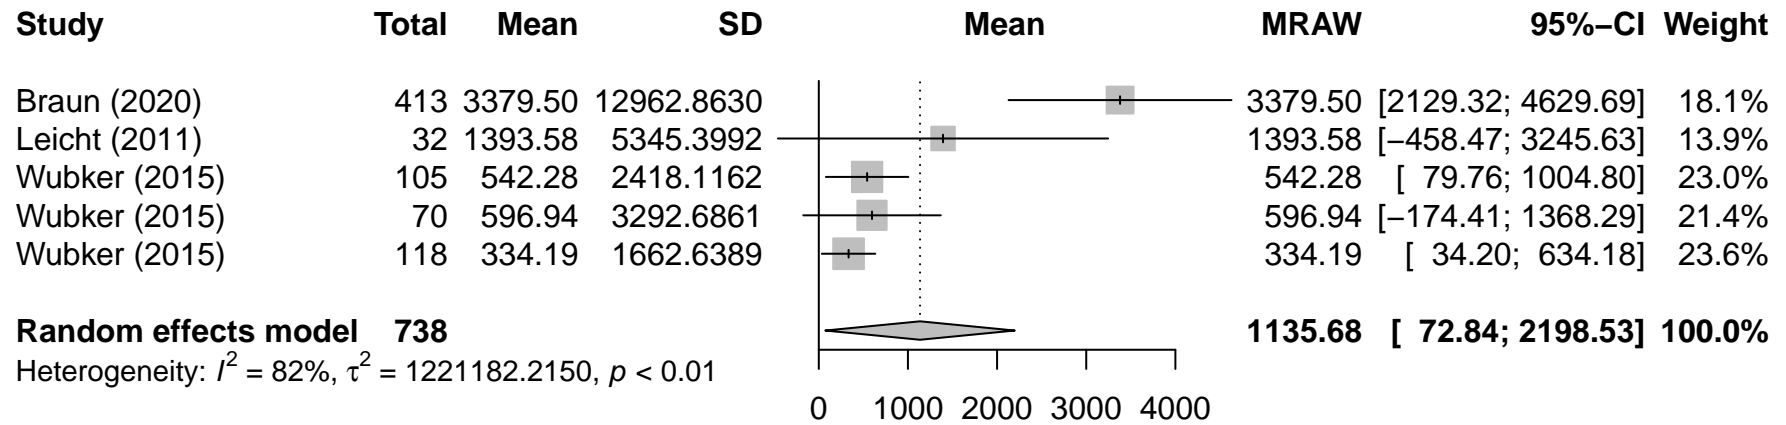

Western Europe, All, Moderate, Caregiver time

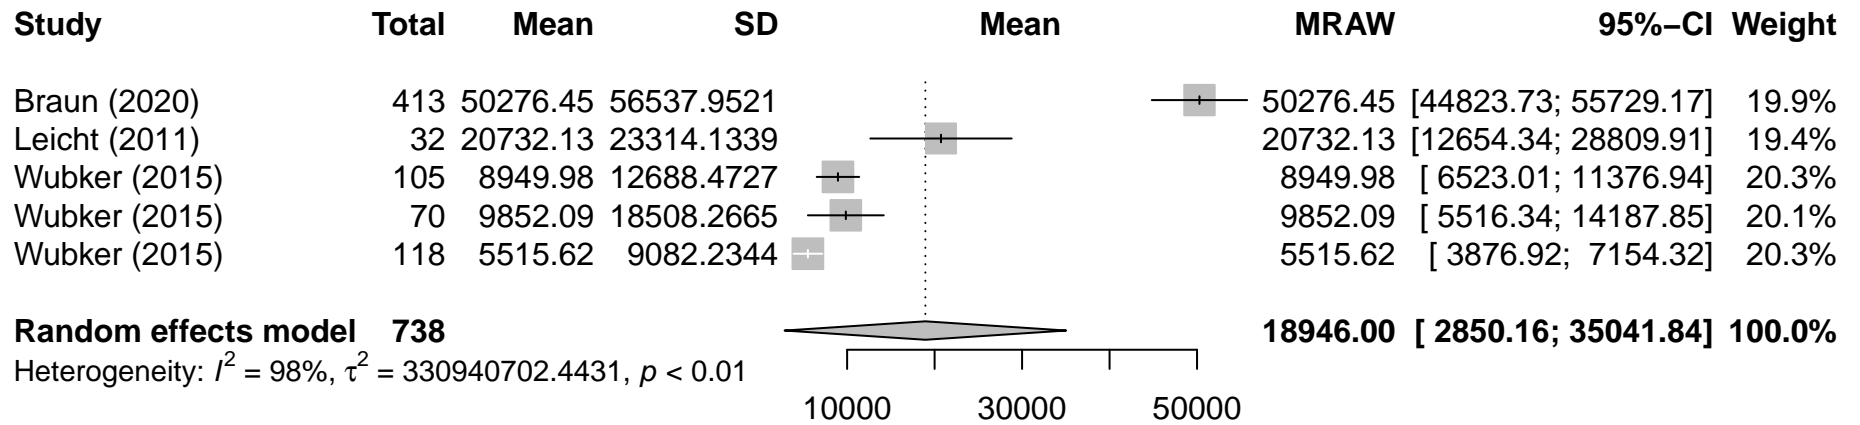

Western Europe, All, Severe, Inpatient care

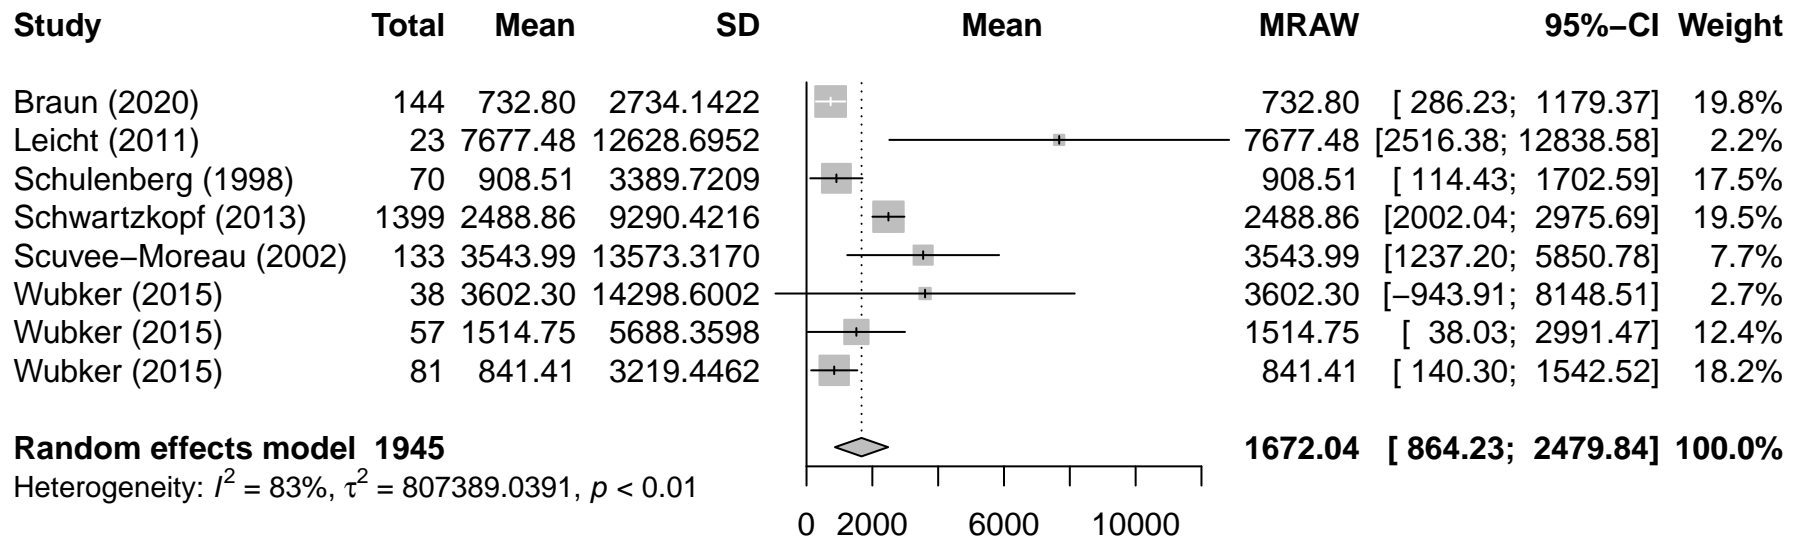

Western Europe, All, Severe, Outpatient care

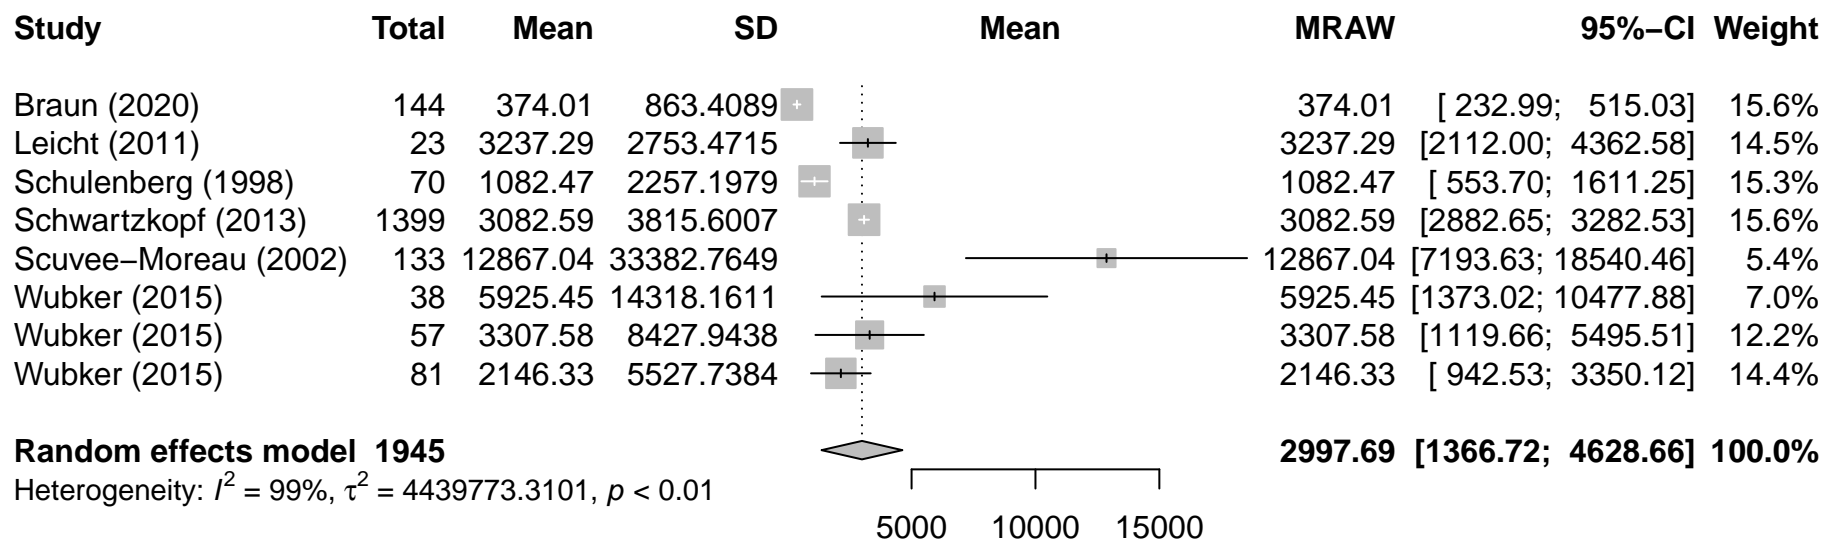



Western Europe, All, Severe, Pharmaceuticals

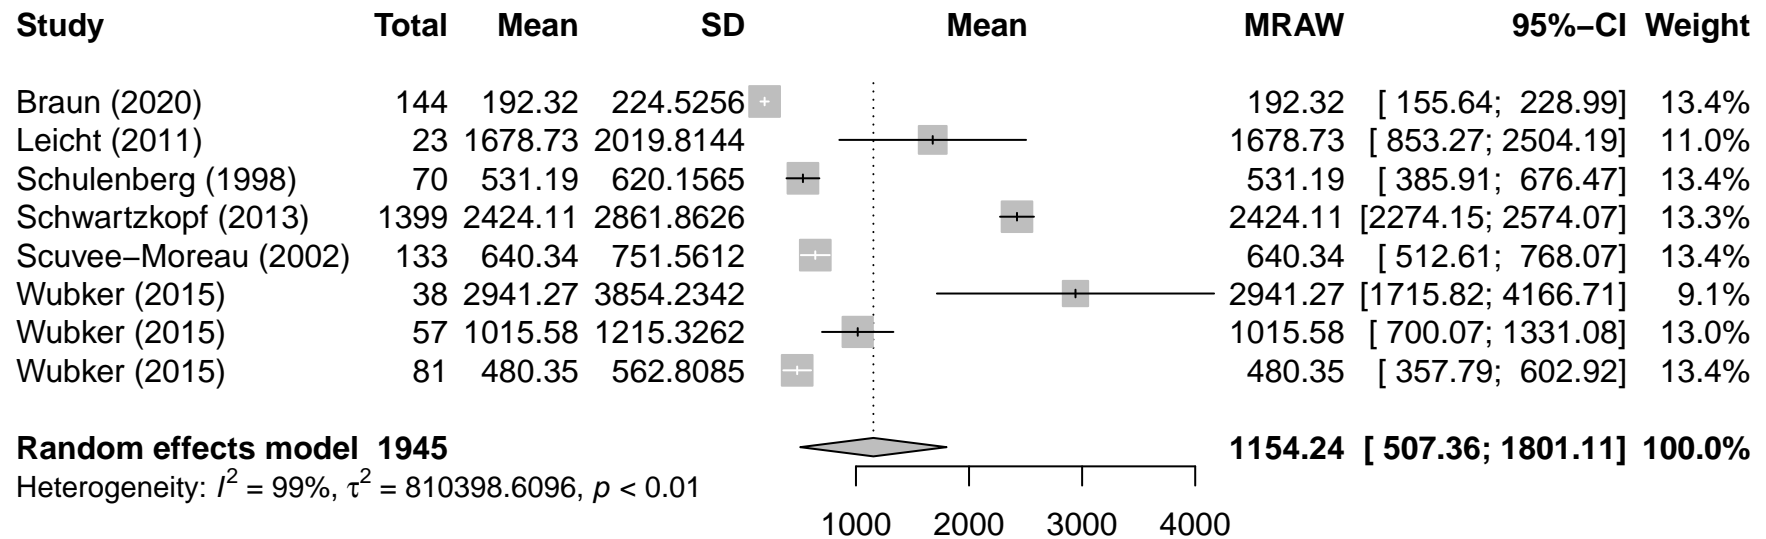

Western Europe, All, Severe, Institutional care

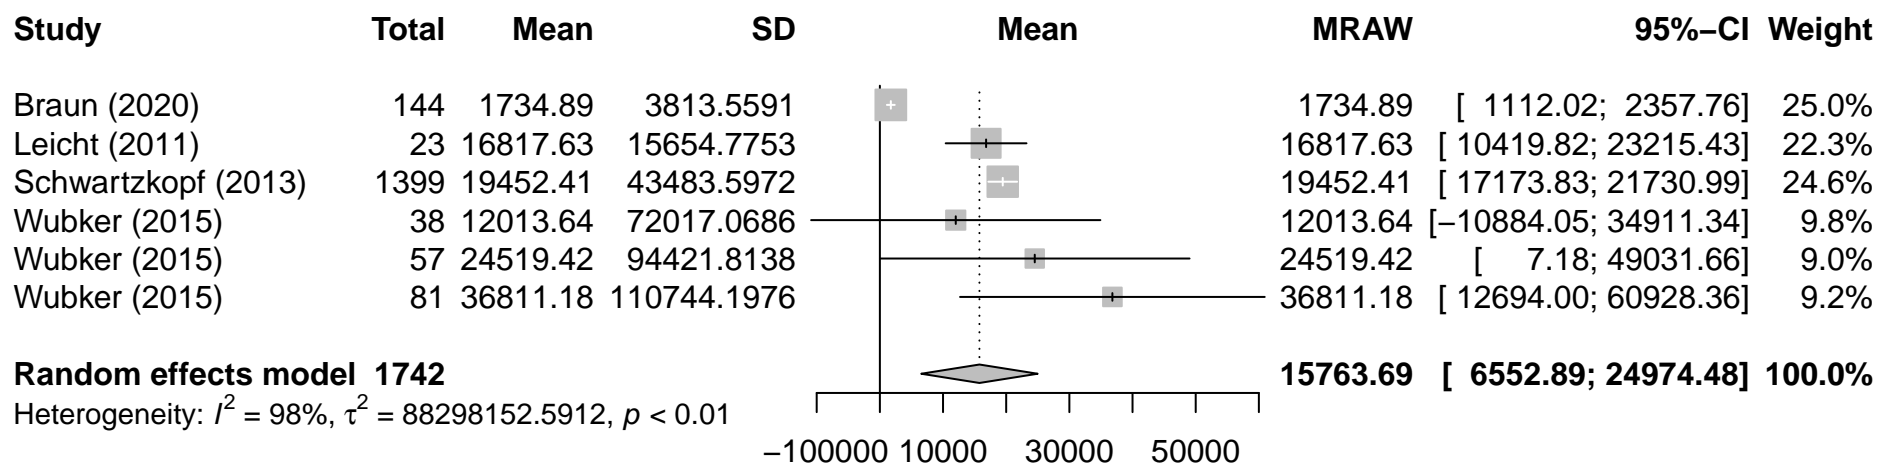

Western Europe, All, Severe, Community care

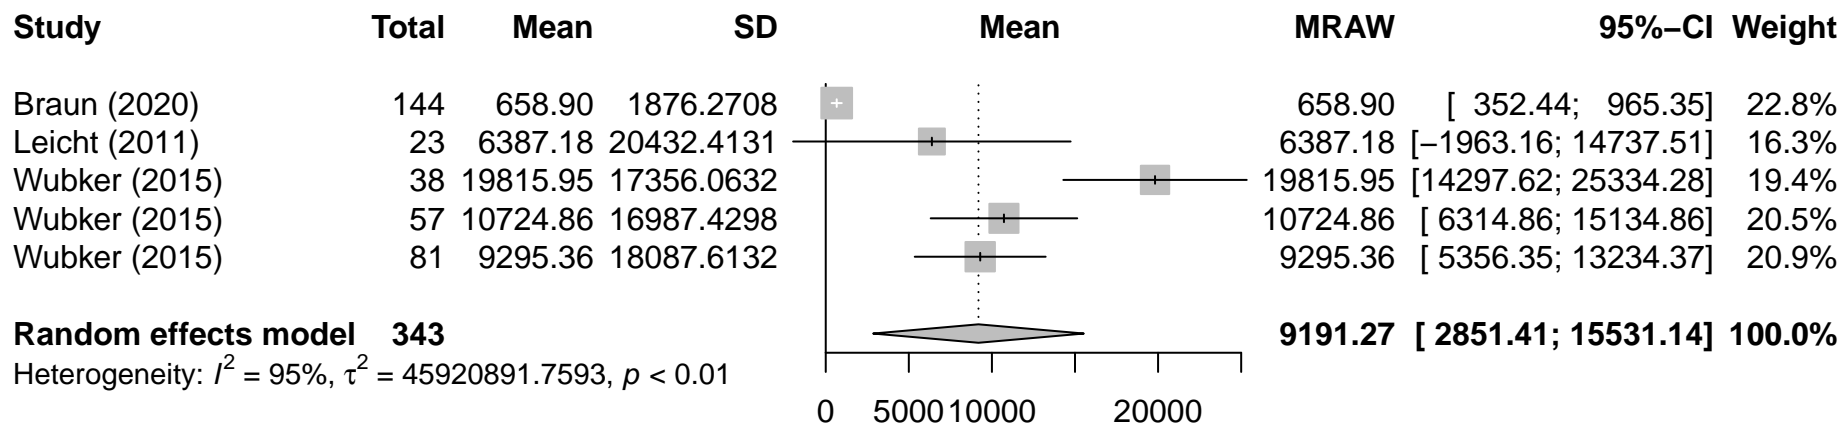

Western Europe, All, Severe, Caregiver work loss

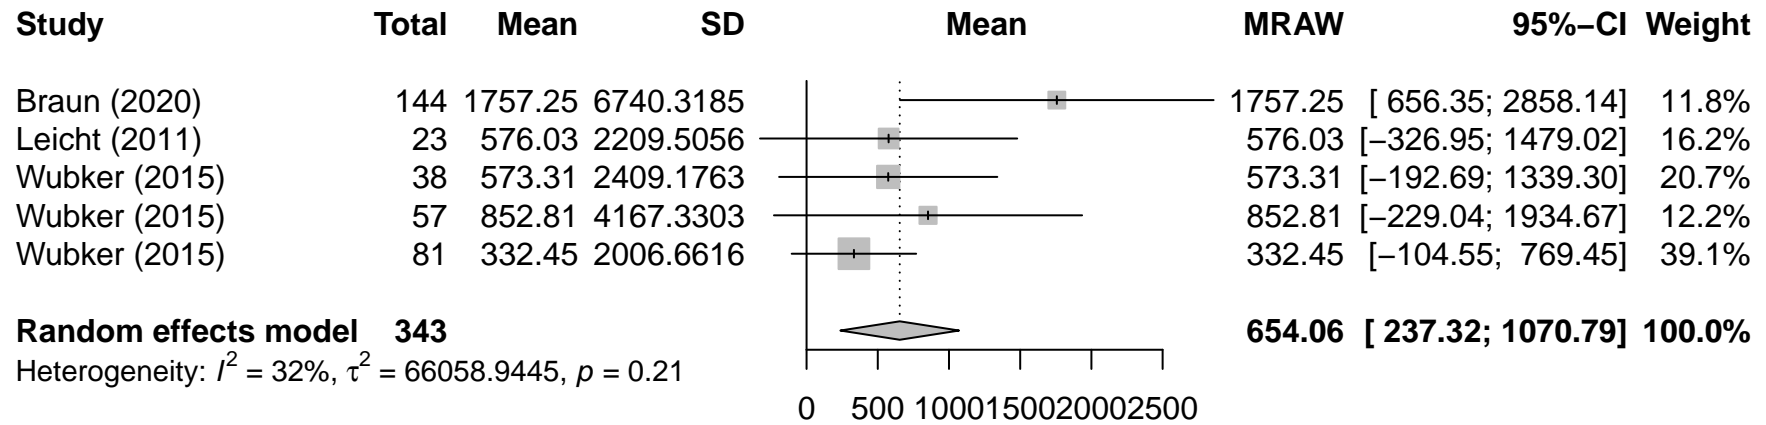

Western Europe, All, Severe, Caregiver time

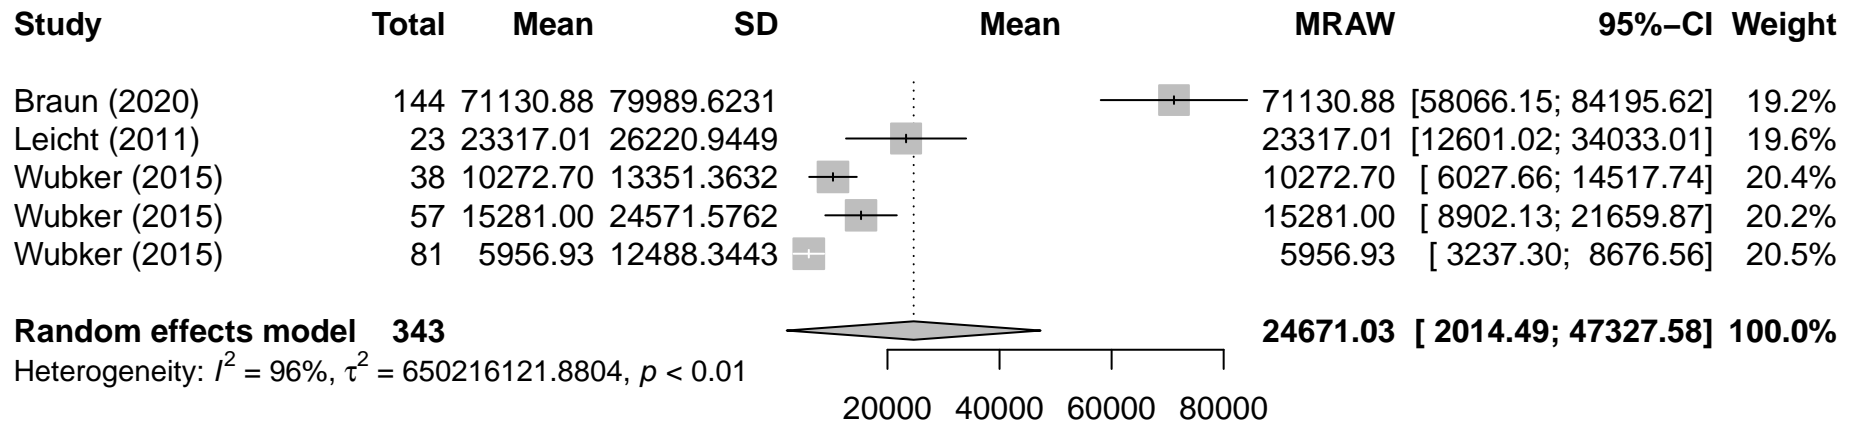

Western Europe, All, All, Inpatient care

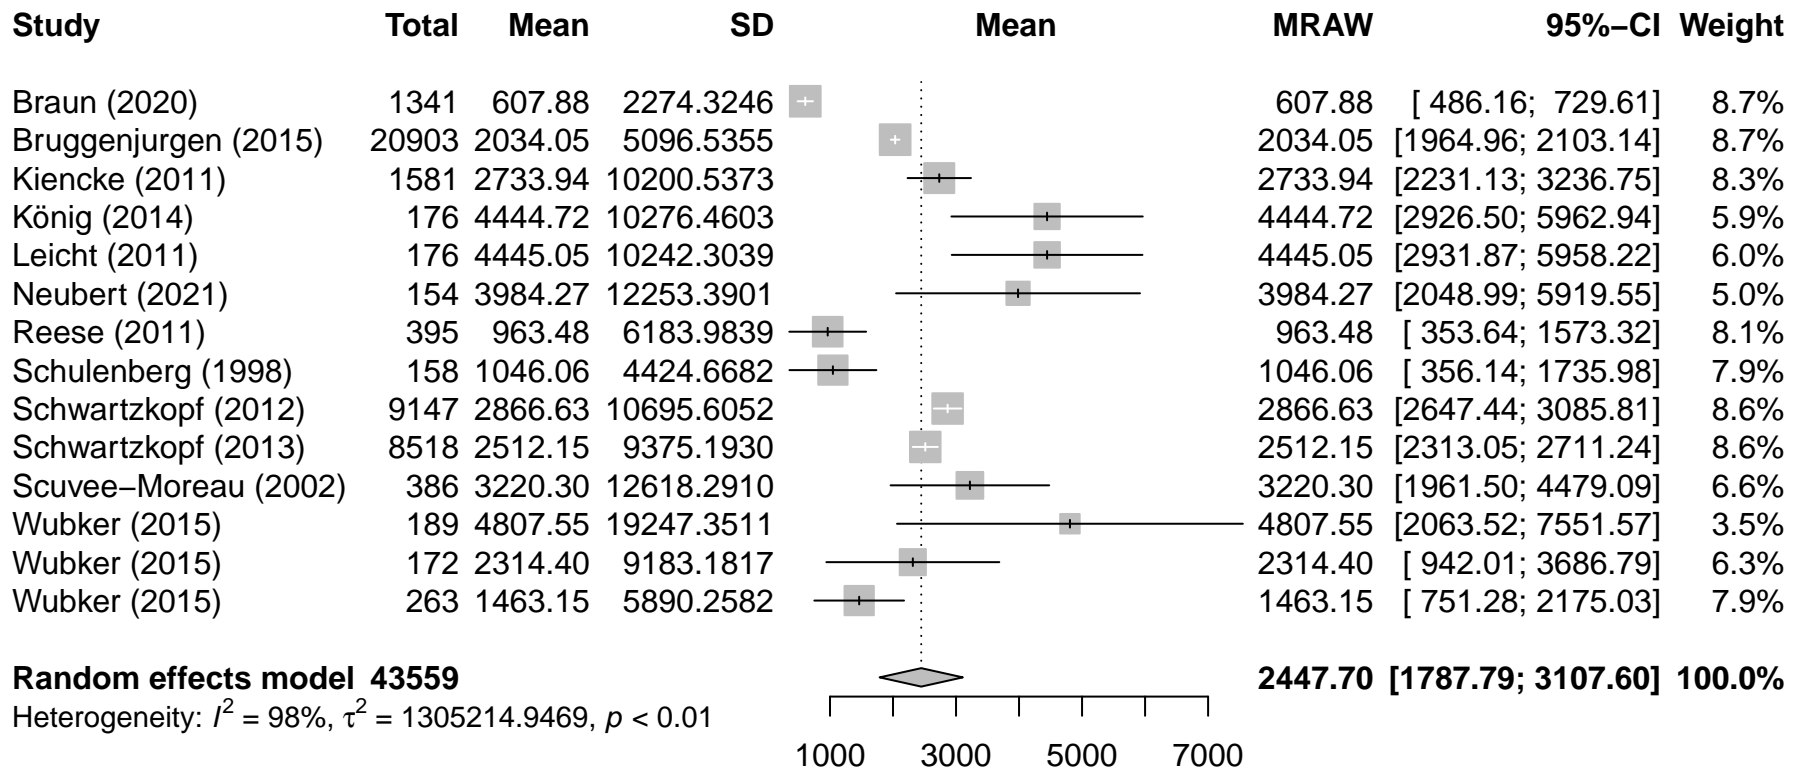

Western Europe, All, All, Outpatient care

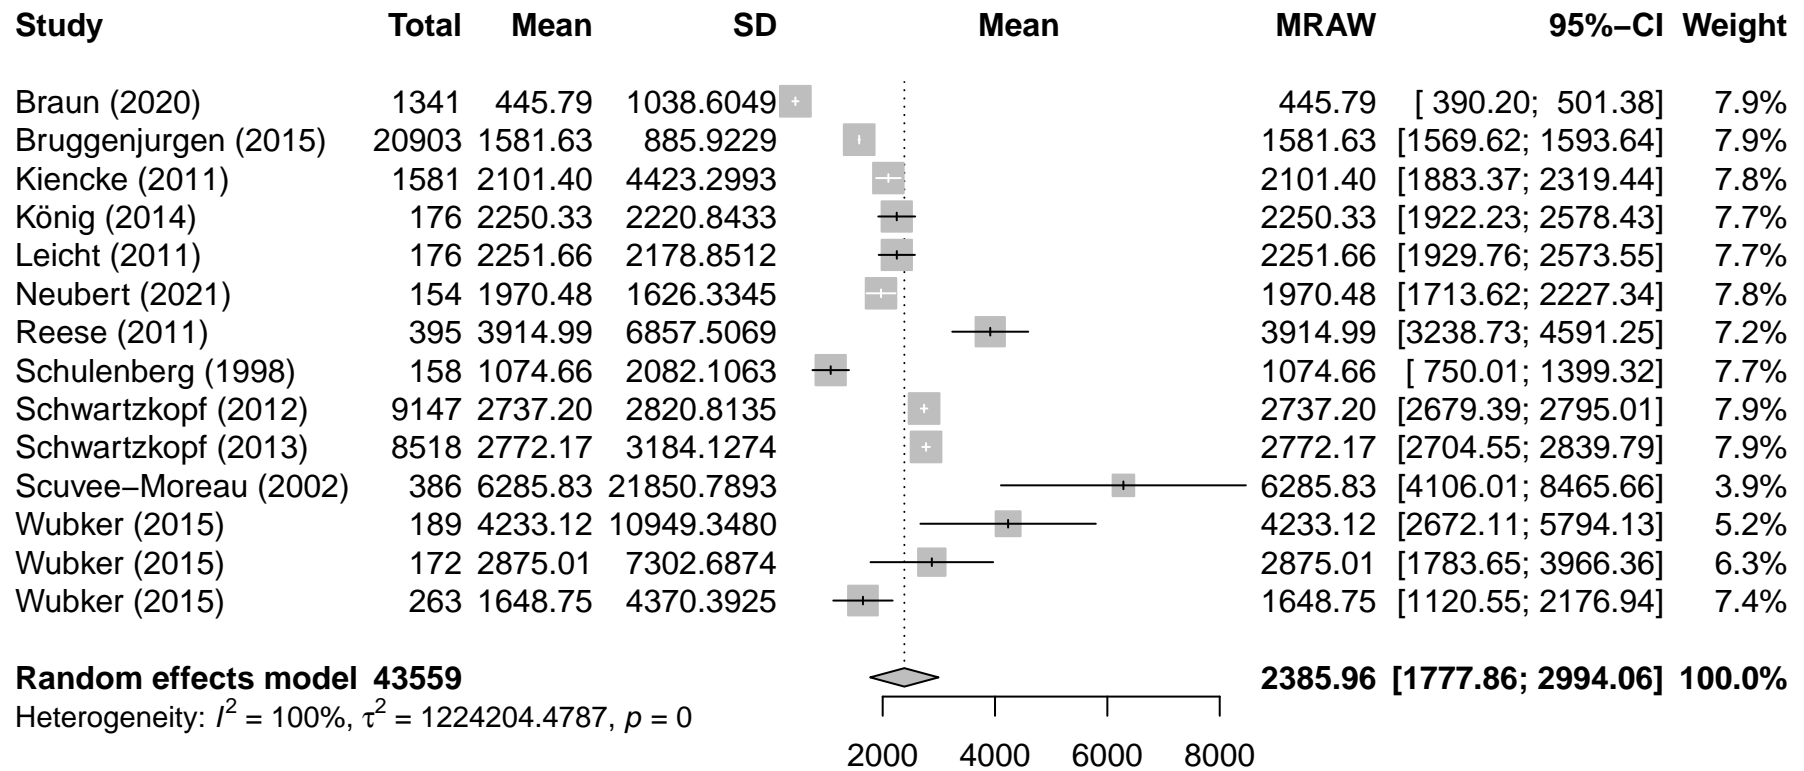

Western Europe, All, All, Pharmaceuticals

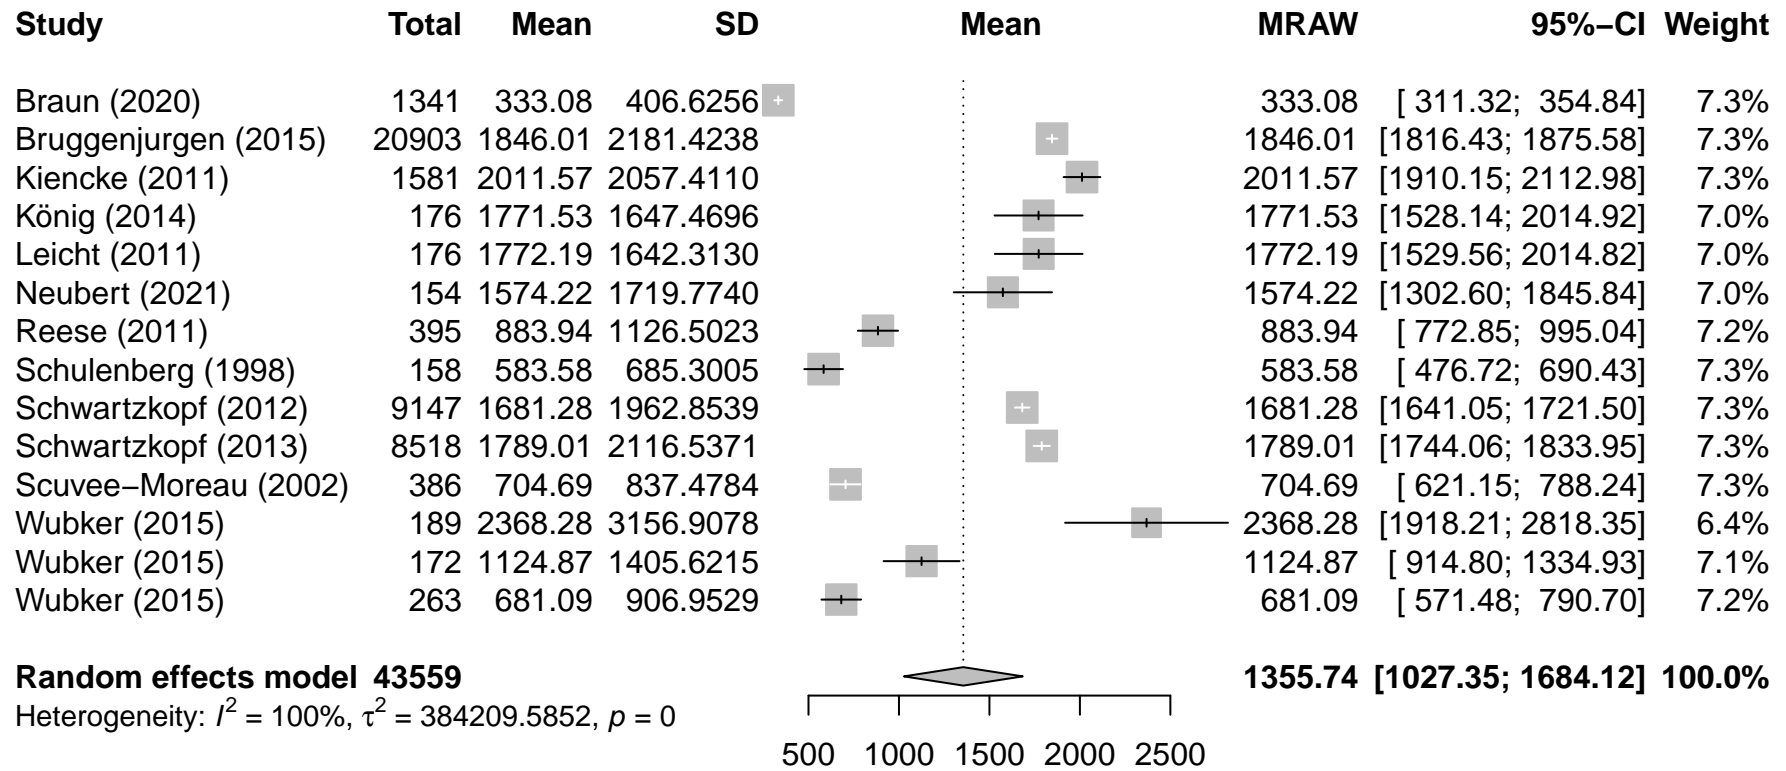



Western Europe, All, All, Institutional care

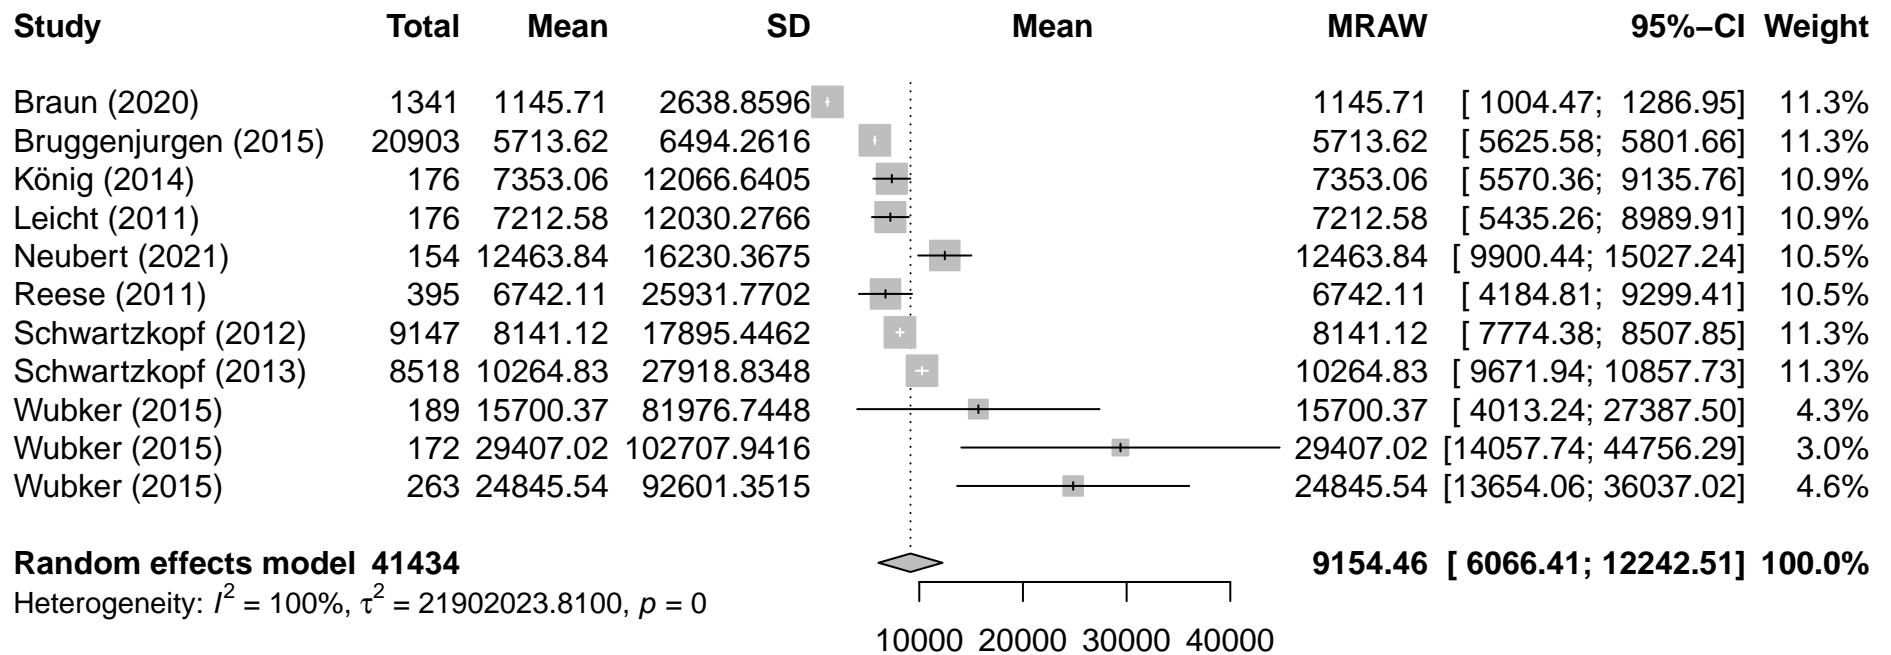

Western Europe, All, All, Community care

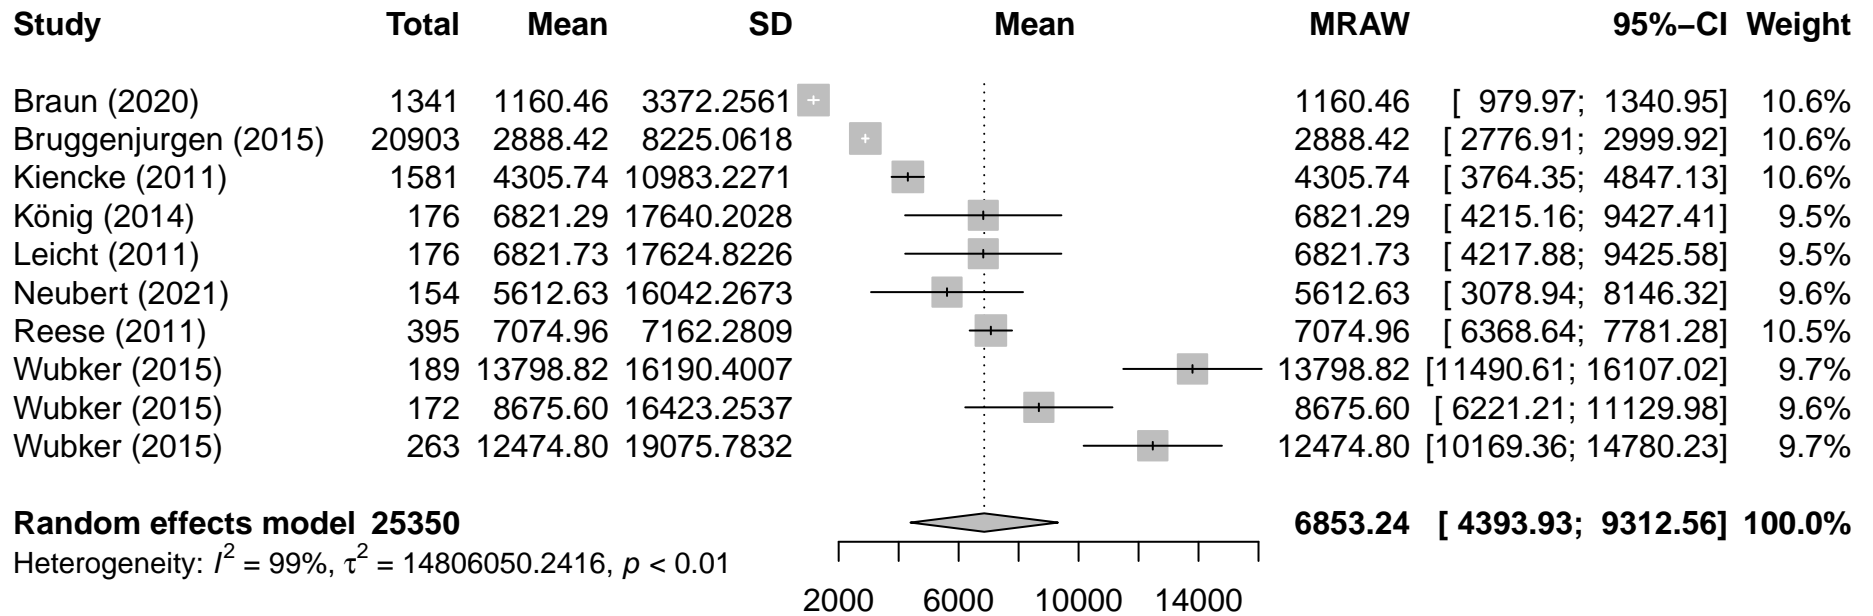

Western Europe, All, All, Caregiver work loss

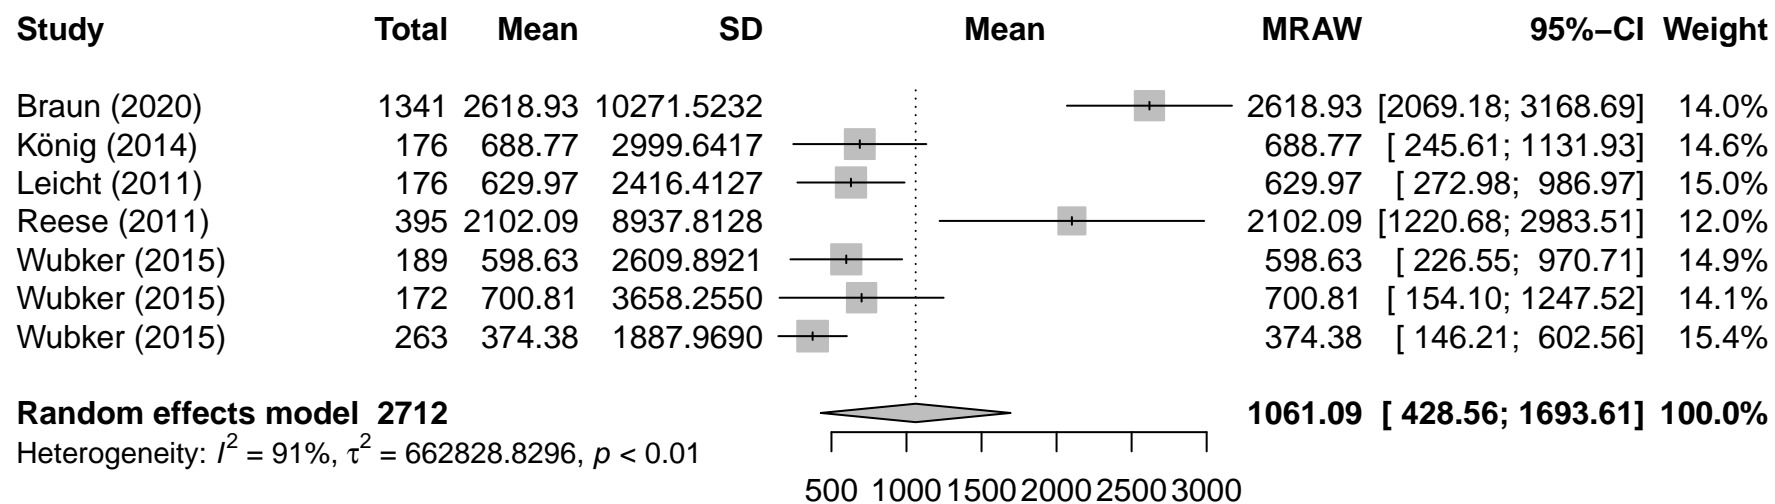

Western Europe, All, All, Caregiver time

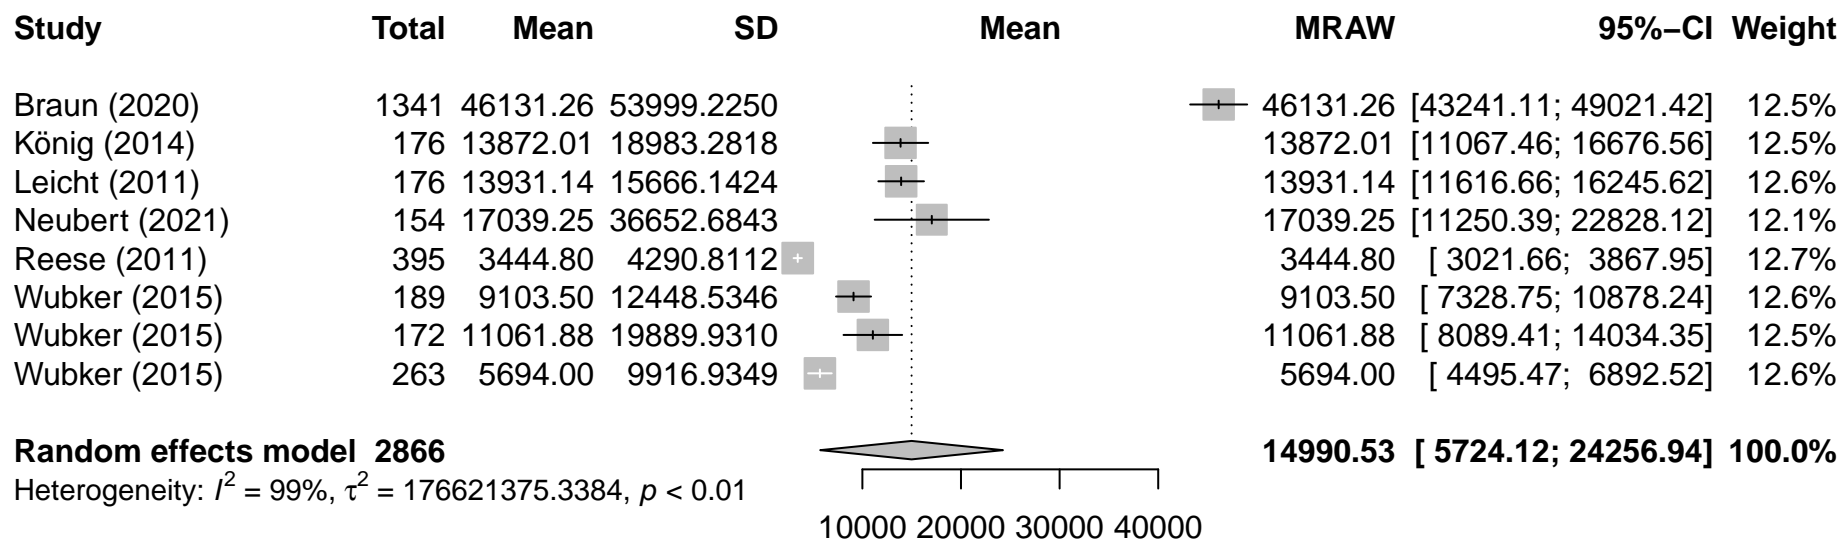

Southern Europe, Community, Mild, Inpatient care

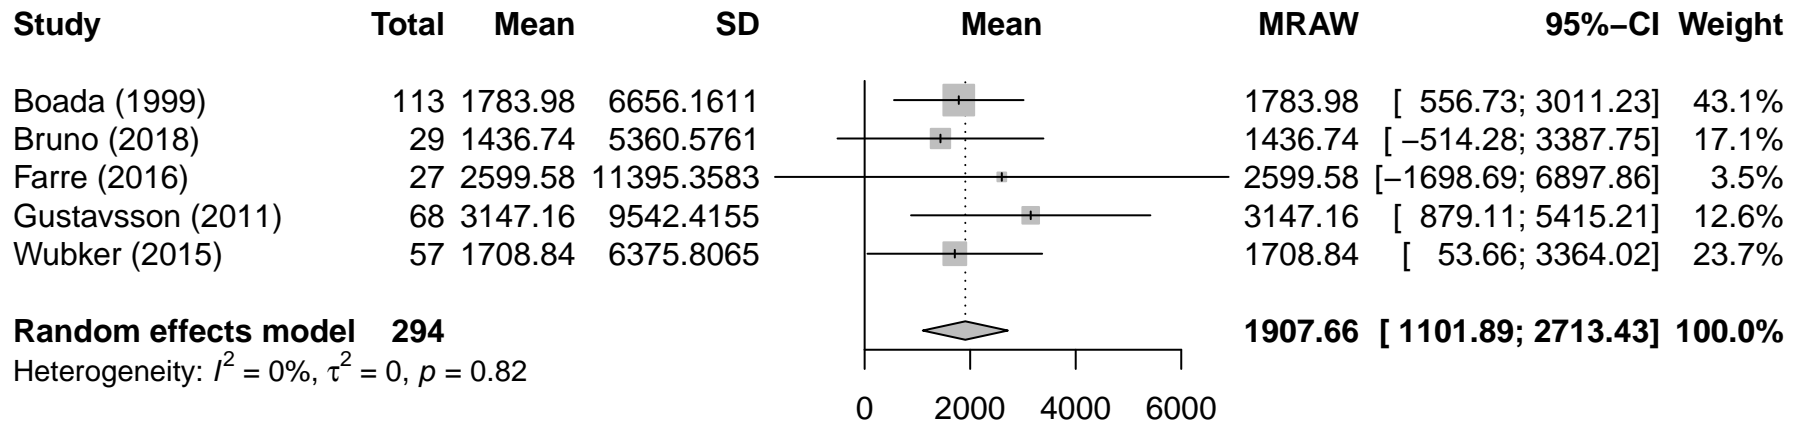

Southern Europe, Community, Mild, Outpatient care

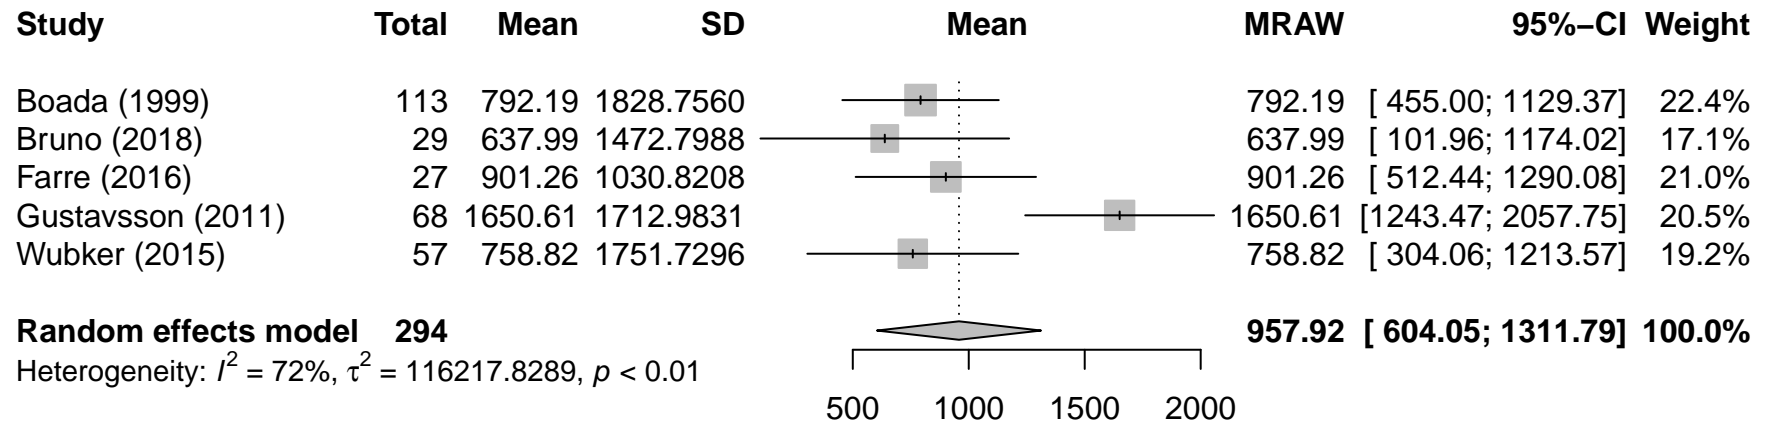

Southern Europe, Community, Mild, Pharmaceuticals

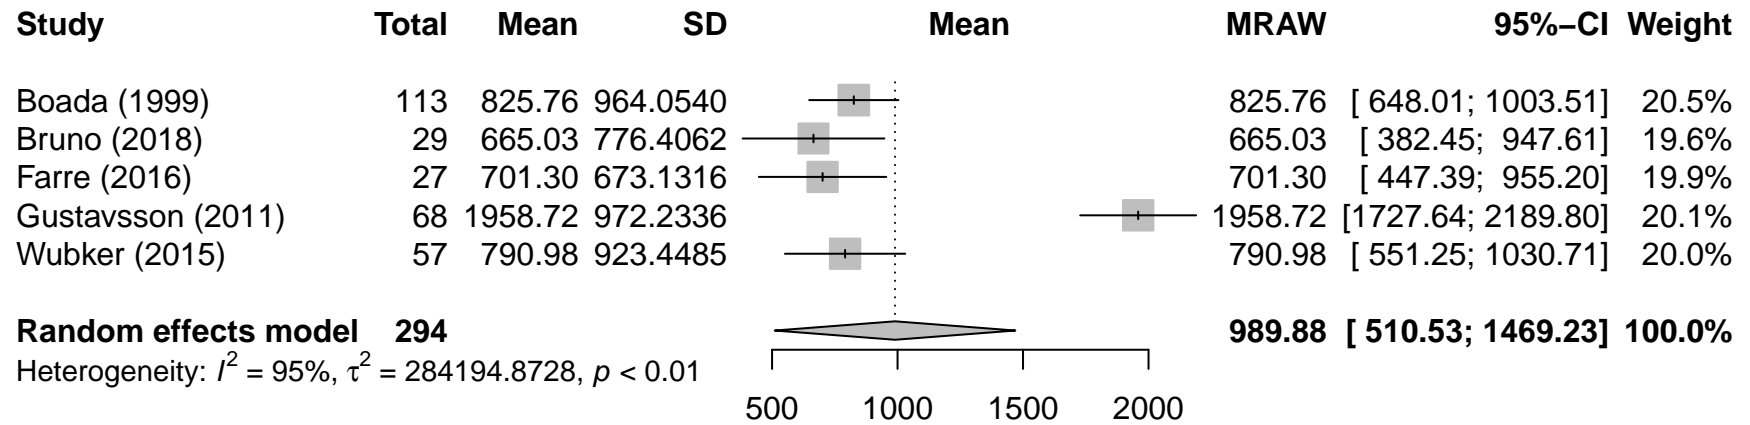

Southern Europe, Community, Mild, Institutional care

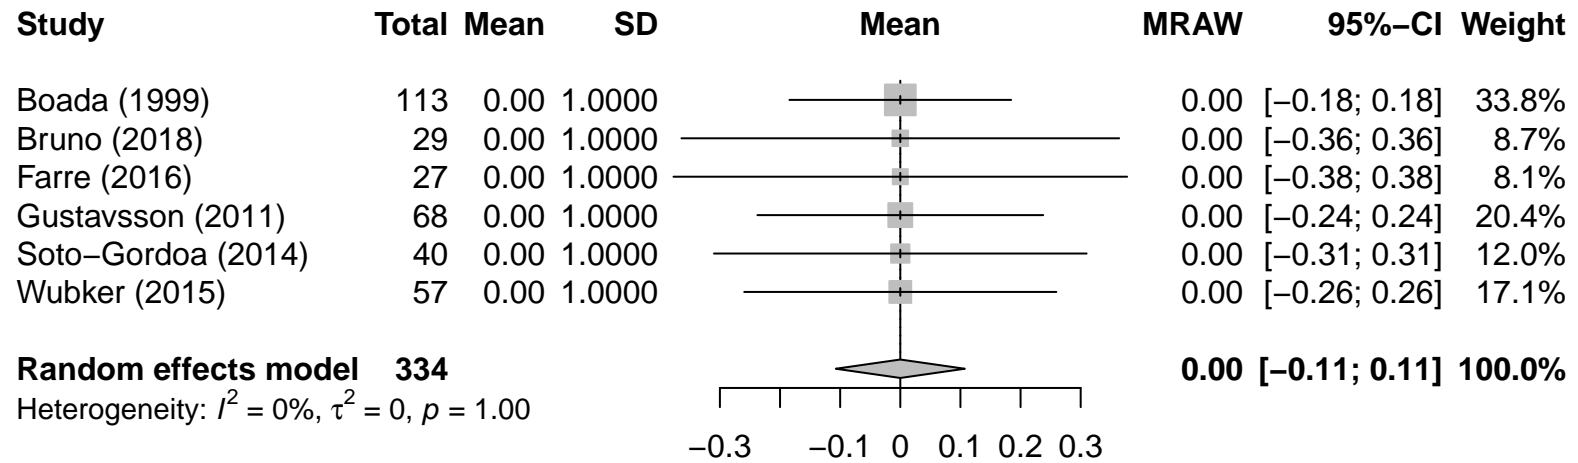



Southern Europe, Community, Mild, Community care

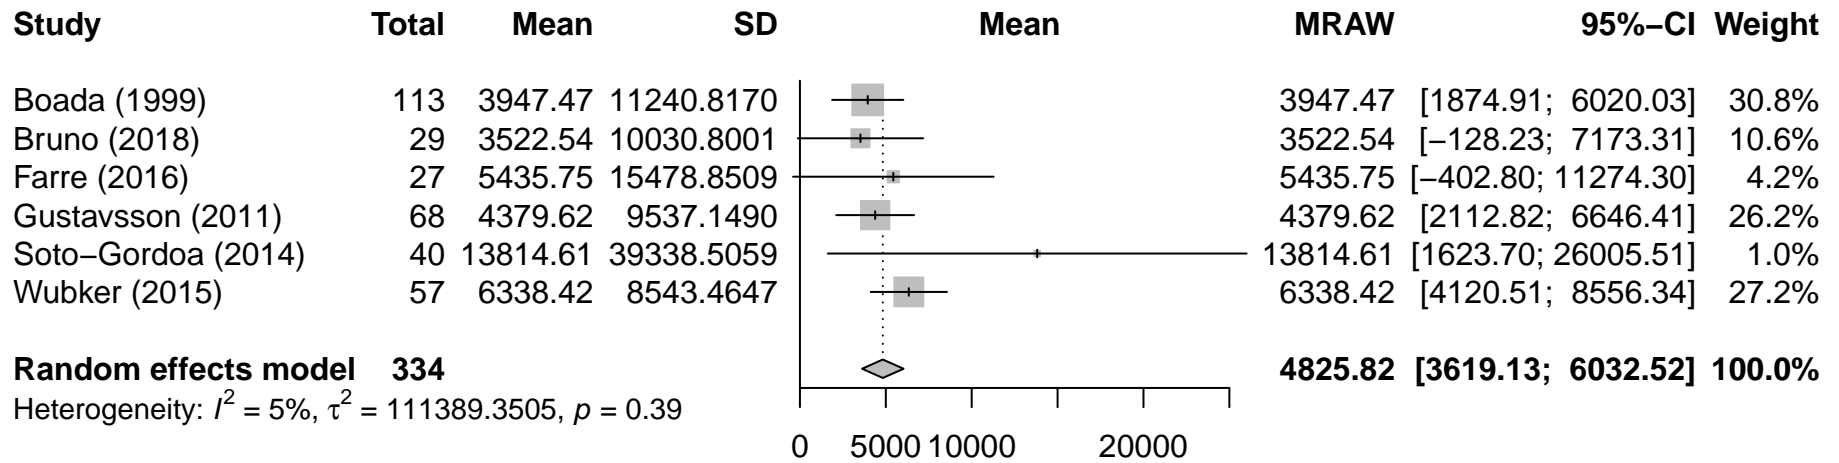

Southern Europe, Community, Mild, Caregiver work loss

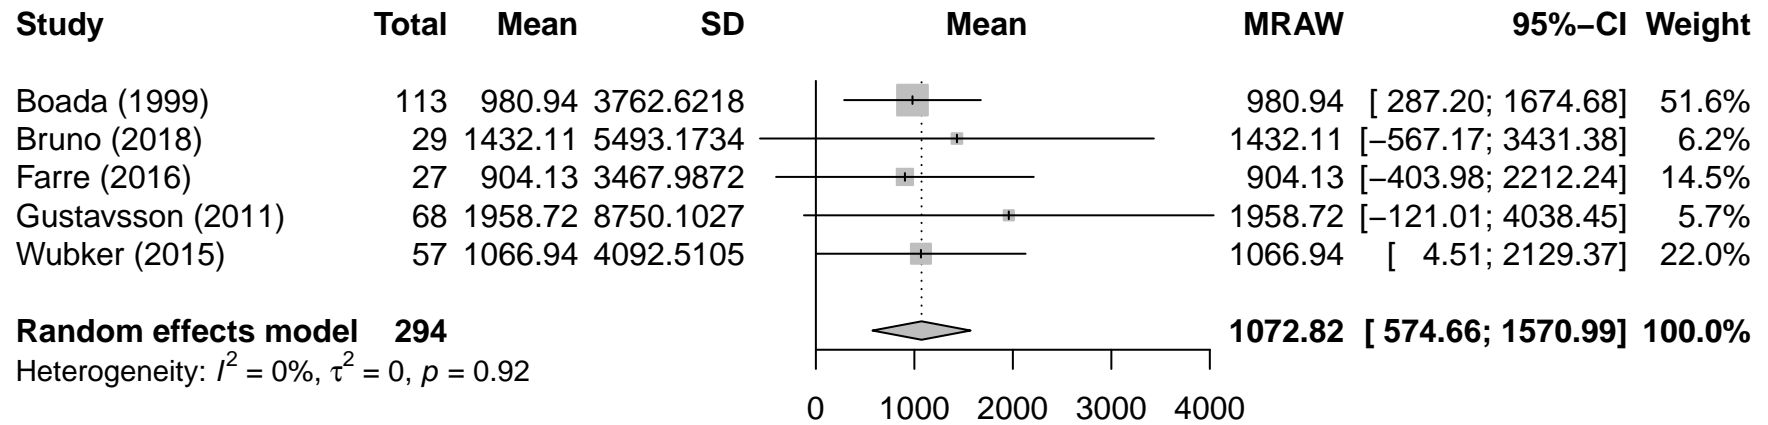

Southern Europe, Community, Mild, Caregiver time

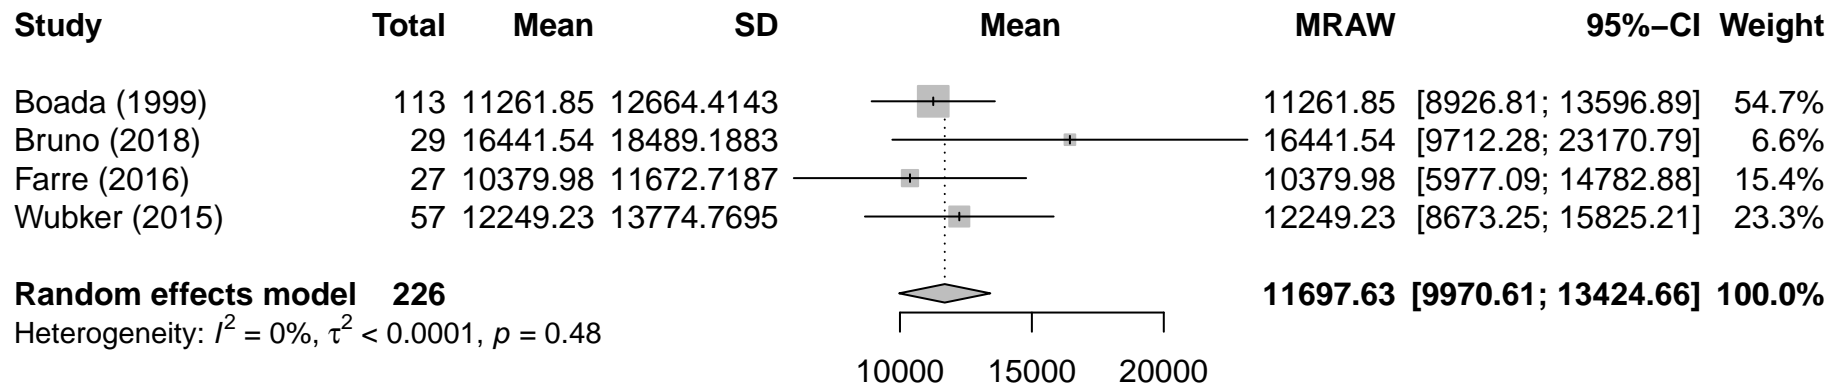

Southern Europe, Community, Moderate, Inpatient care

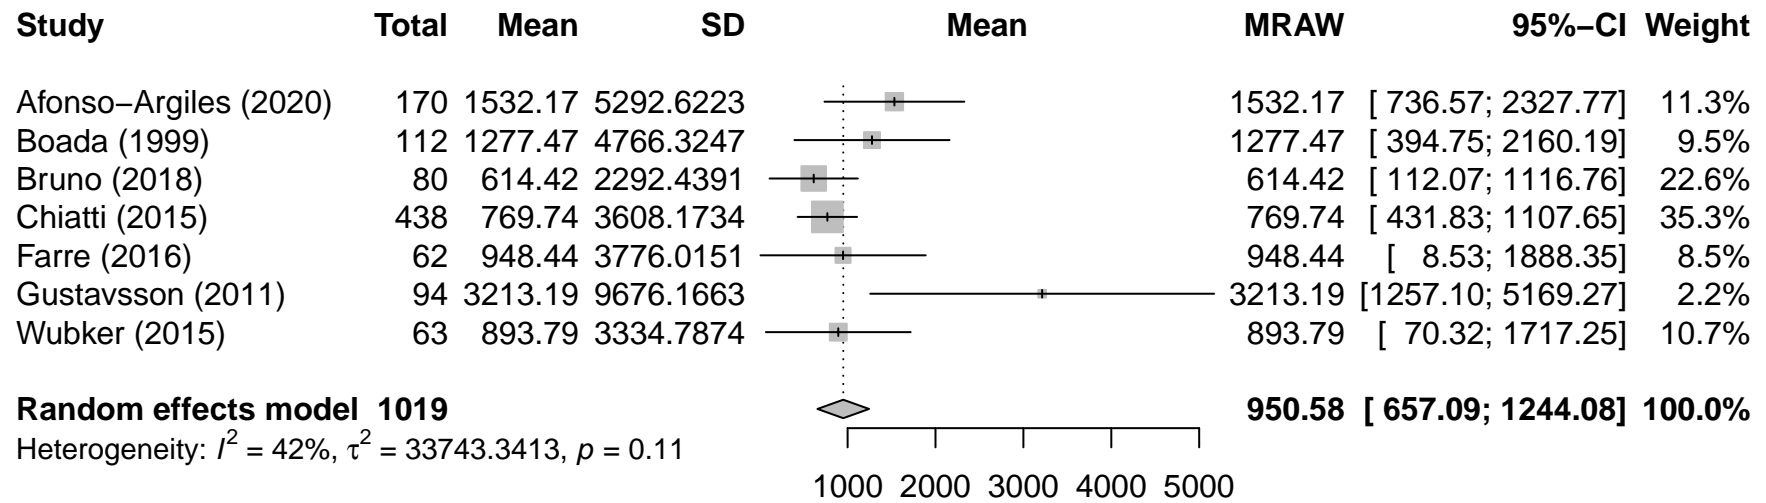

Southern Europe, Community, Moderate, Outpatient care

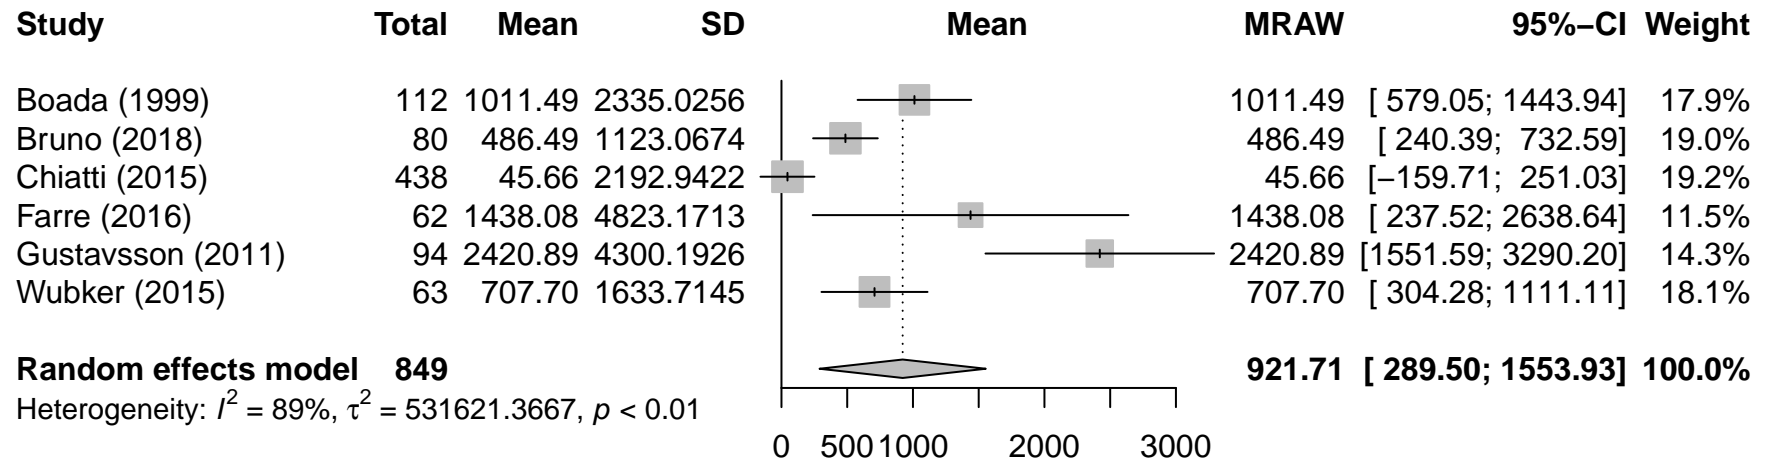

Southern Europe, Community, Moderate, Pharmaceuticals

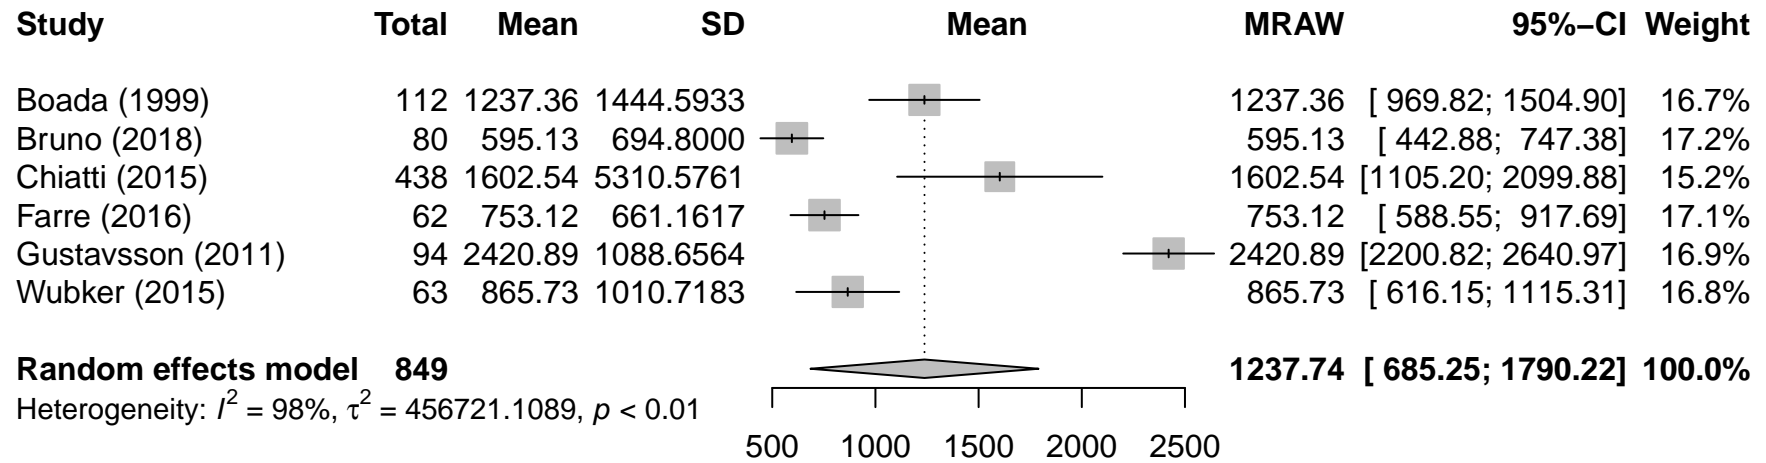

Southern Europe, Community, Moderate, Institutional care

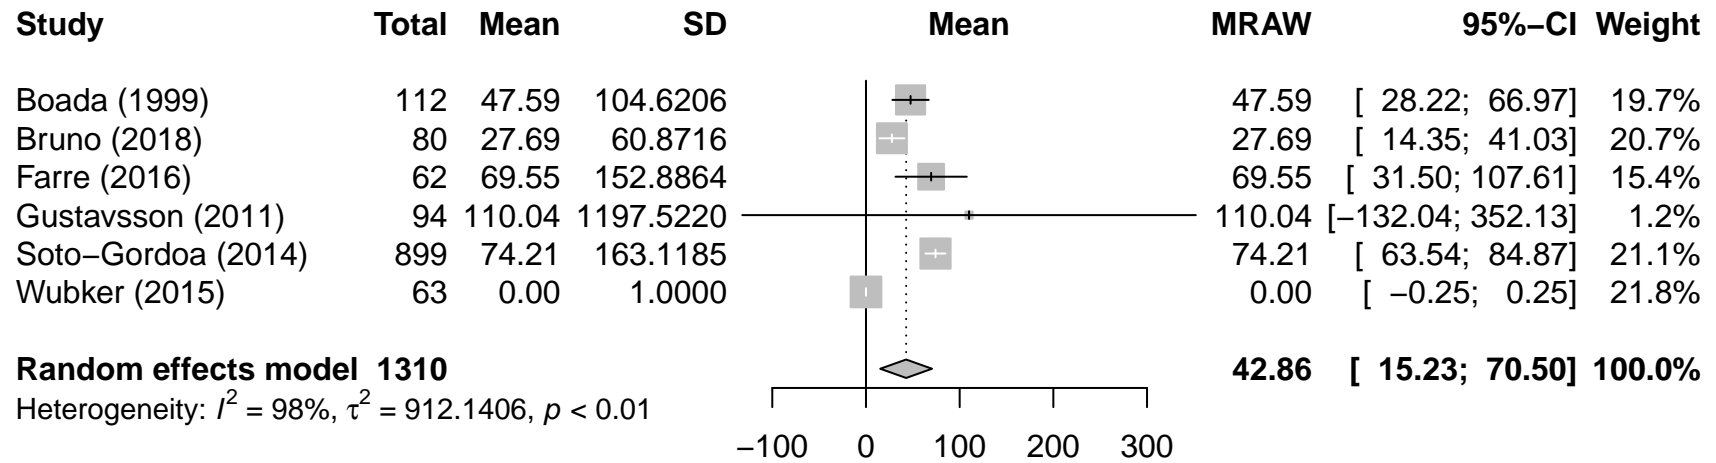

Southern Europe, Community, Moderate, Community care

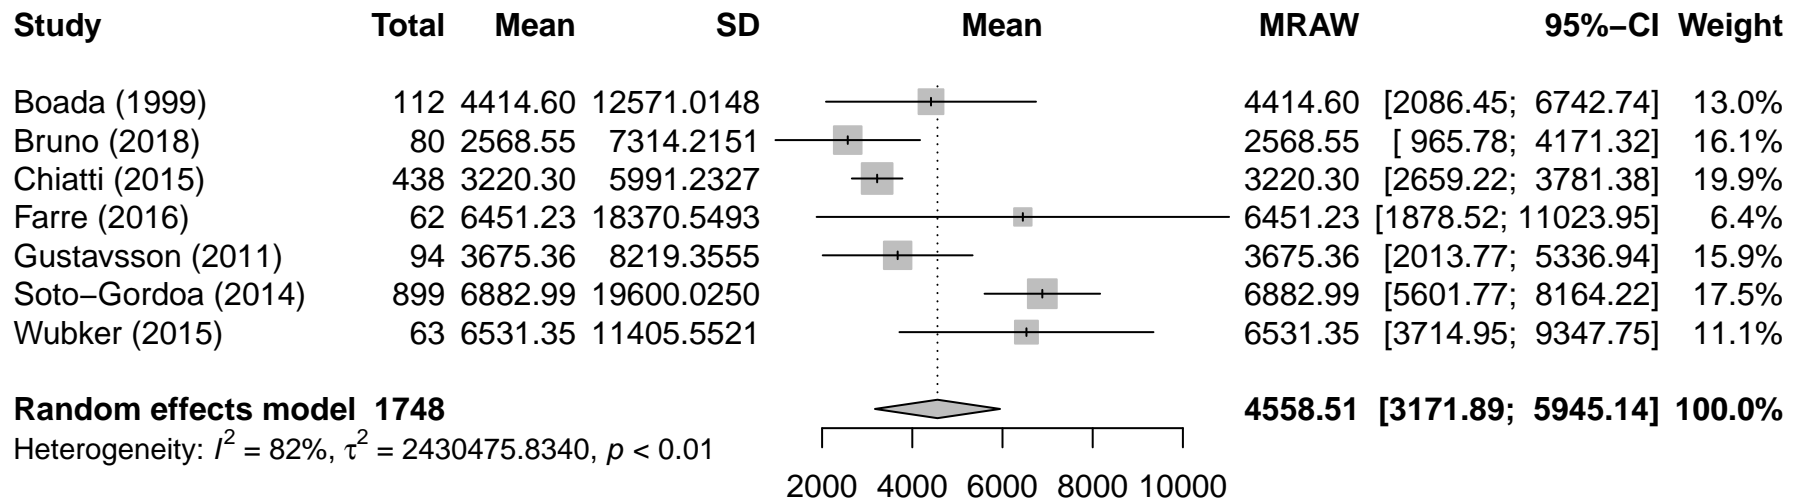



Southern Europe, Community, Moderate, Caregiver work loss

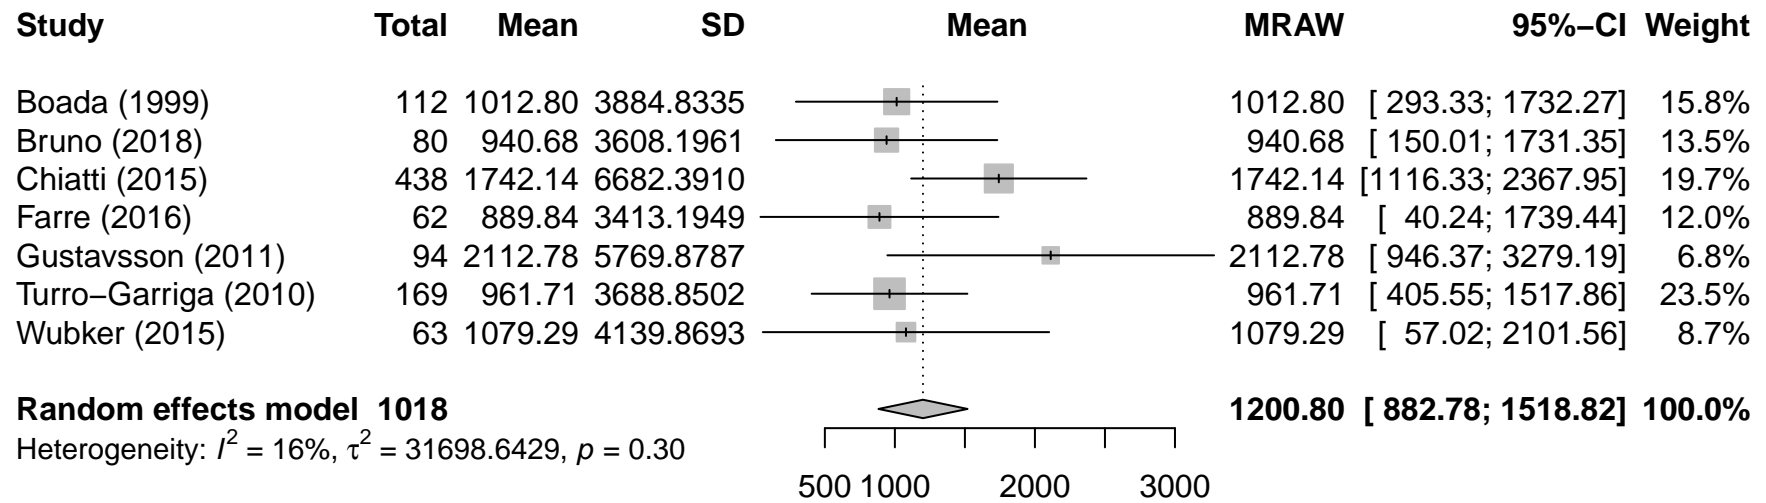

Southern Europe, Community, Moderate, Caregiver time

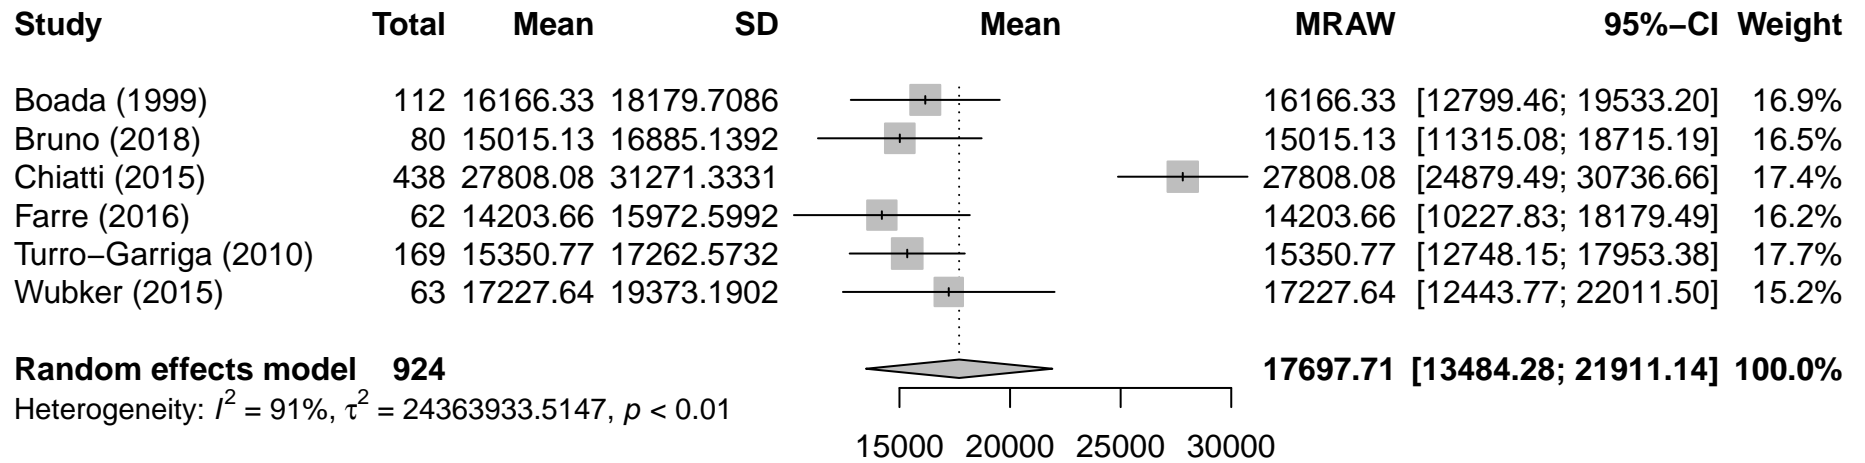

Southern Europe, Community, Severe, Inpatient care

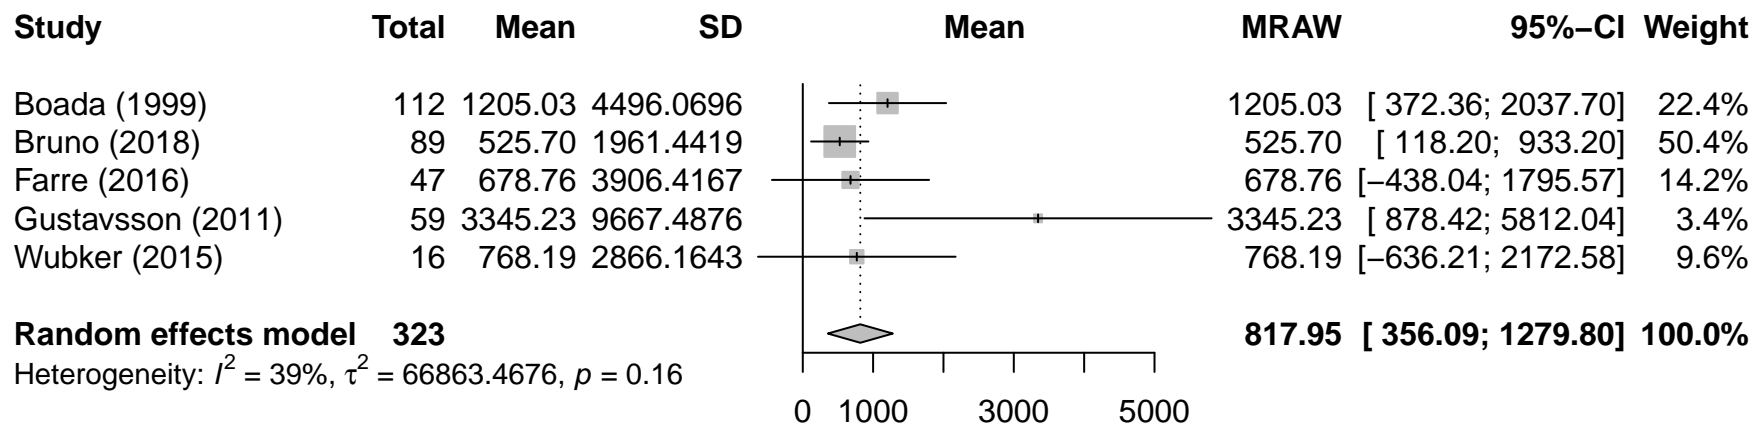

Southern Europe, Community, Severe, Outpatient care

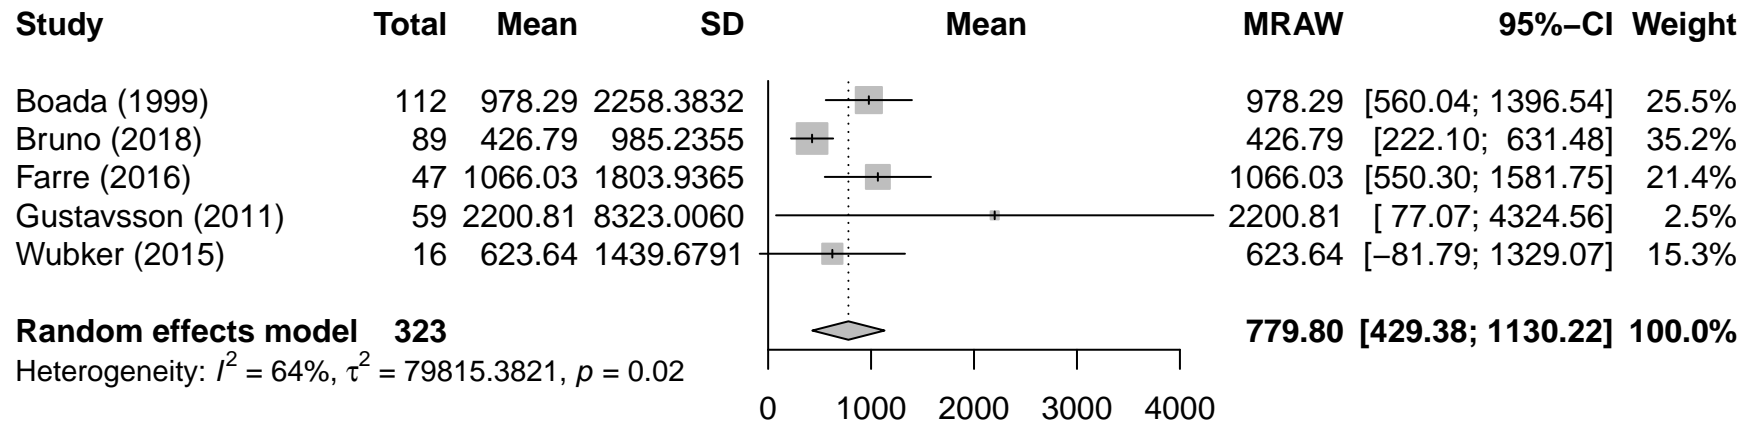

Southern Europe, Community, Severe, Pharmaceuticals

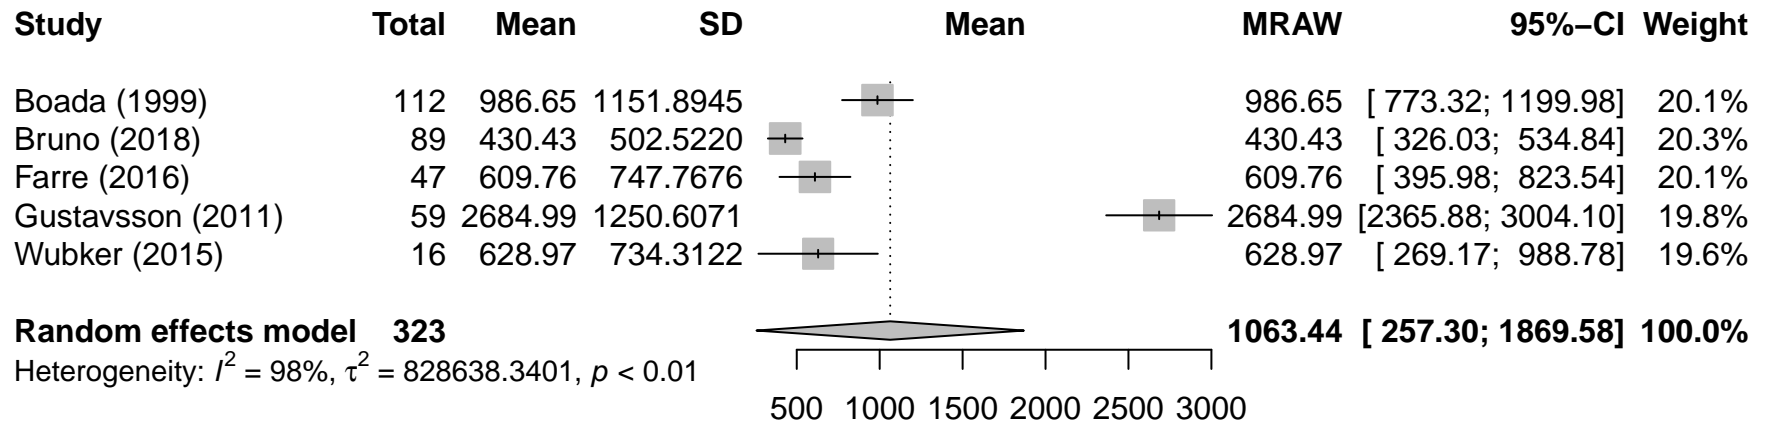

Southern Europe, Community, Severe, Institutional care

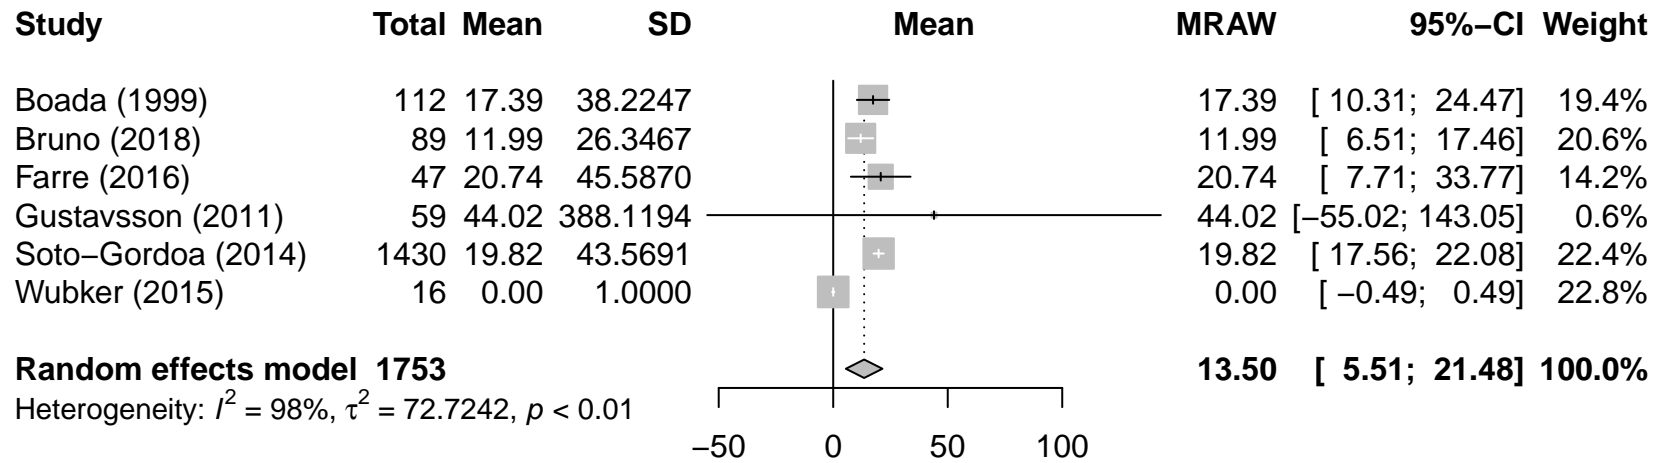

Southern Europe, Community, Severe, Community care

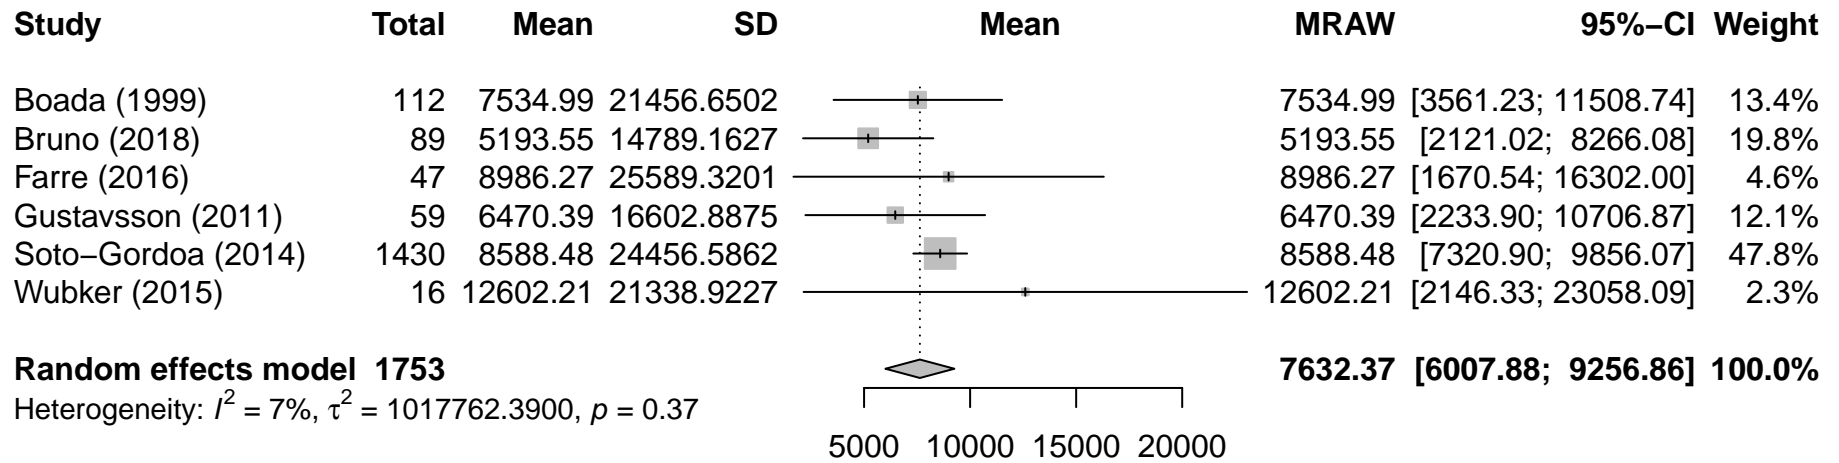

Southern Europe, Community, Severe, Caregiver work loss

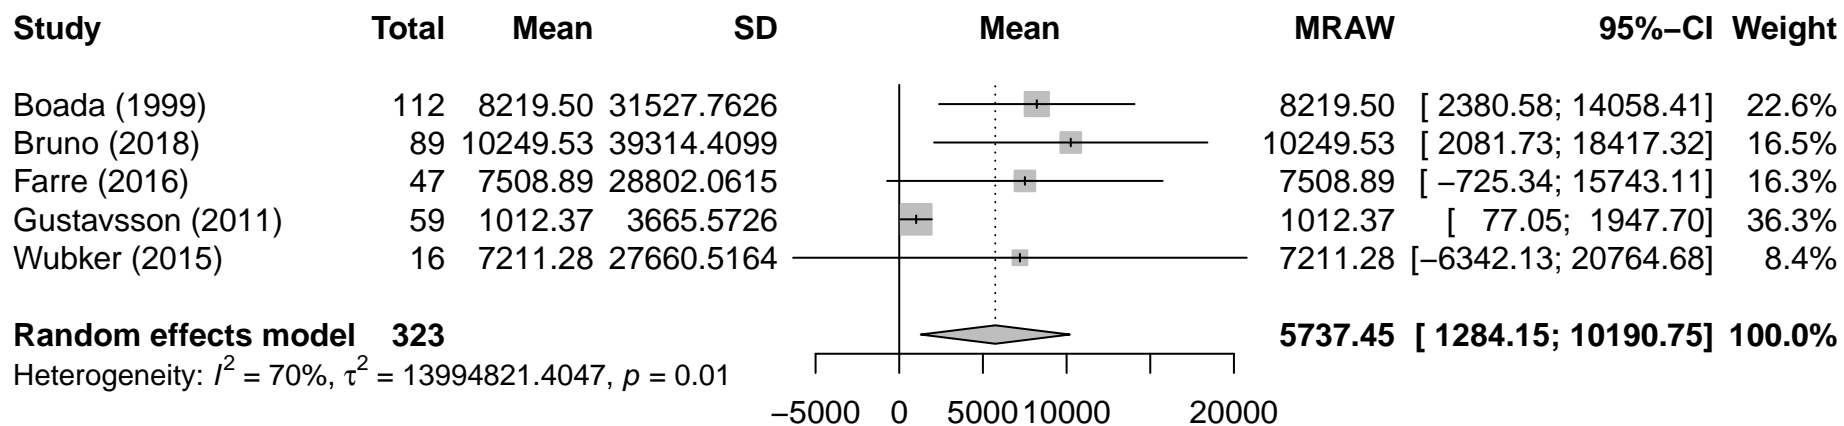



Southern Europe, Community, Severe, Caregiver time

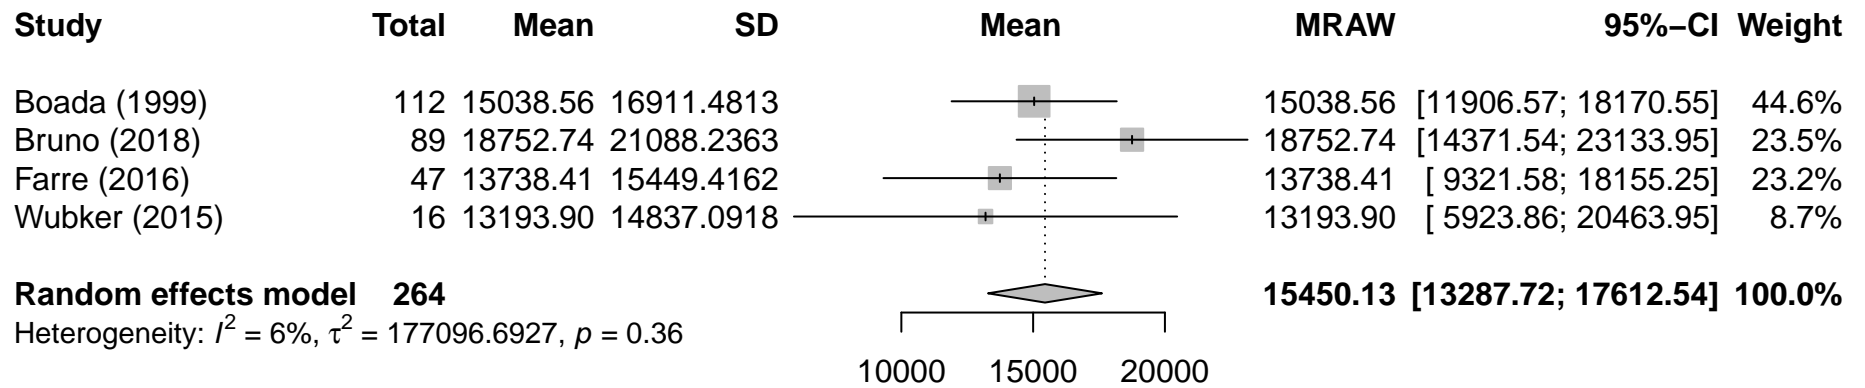

Southern Europe, Community, All, Inpatient care

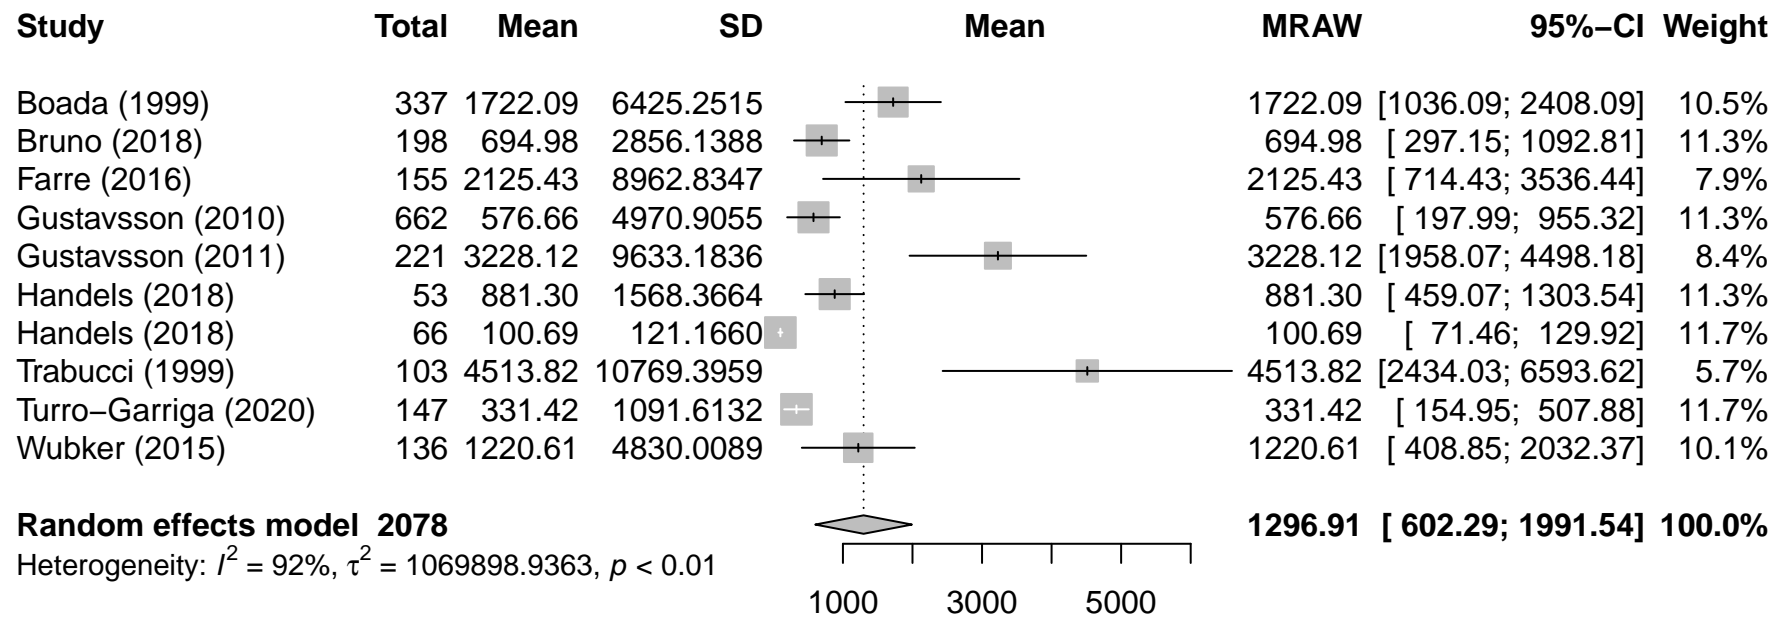

Southern Europe, Community, All, Outpatient care

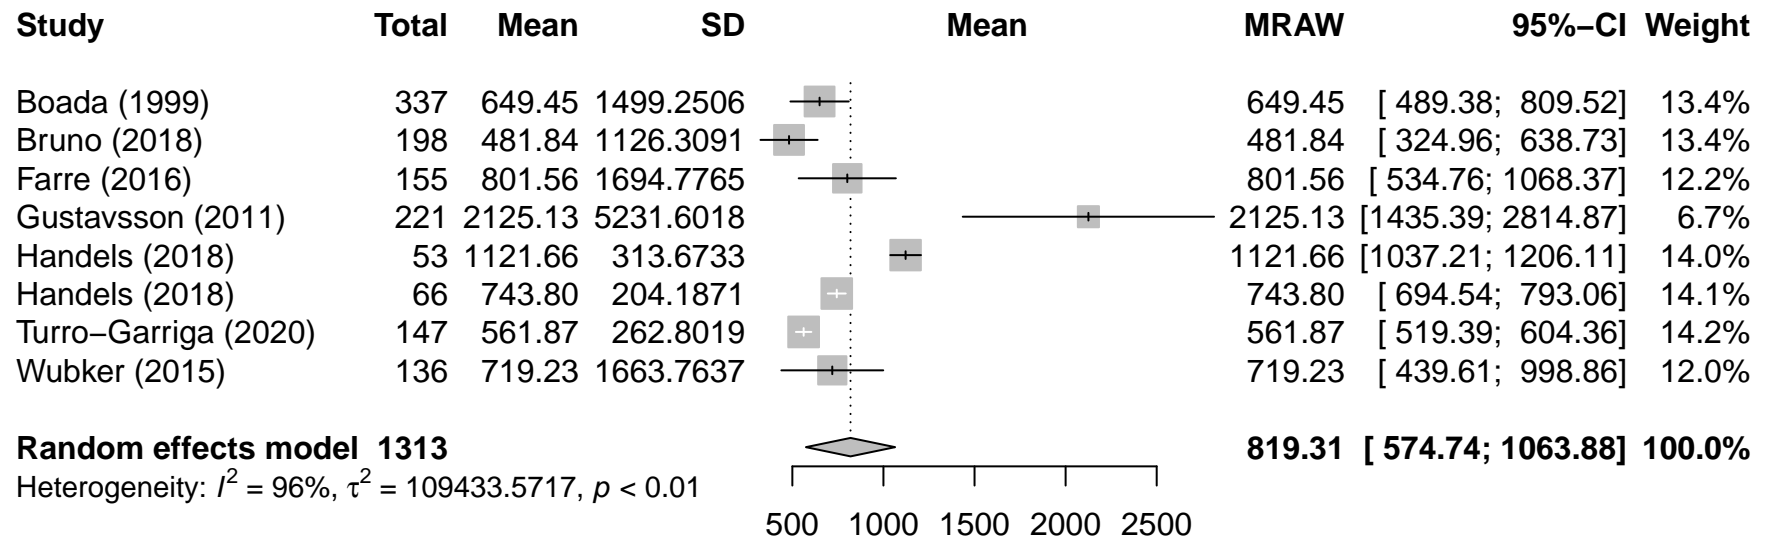

Southern Europe, Community, All, Pharmaceuticals

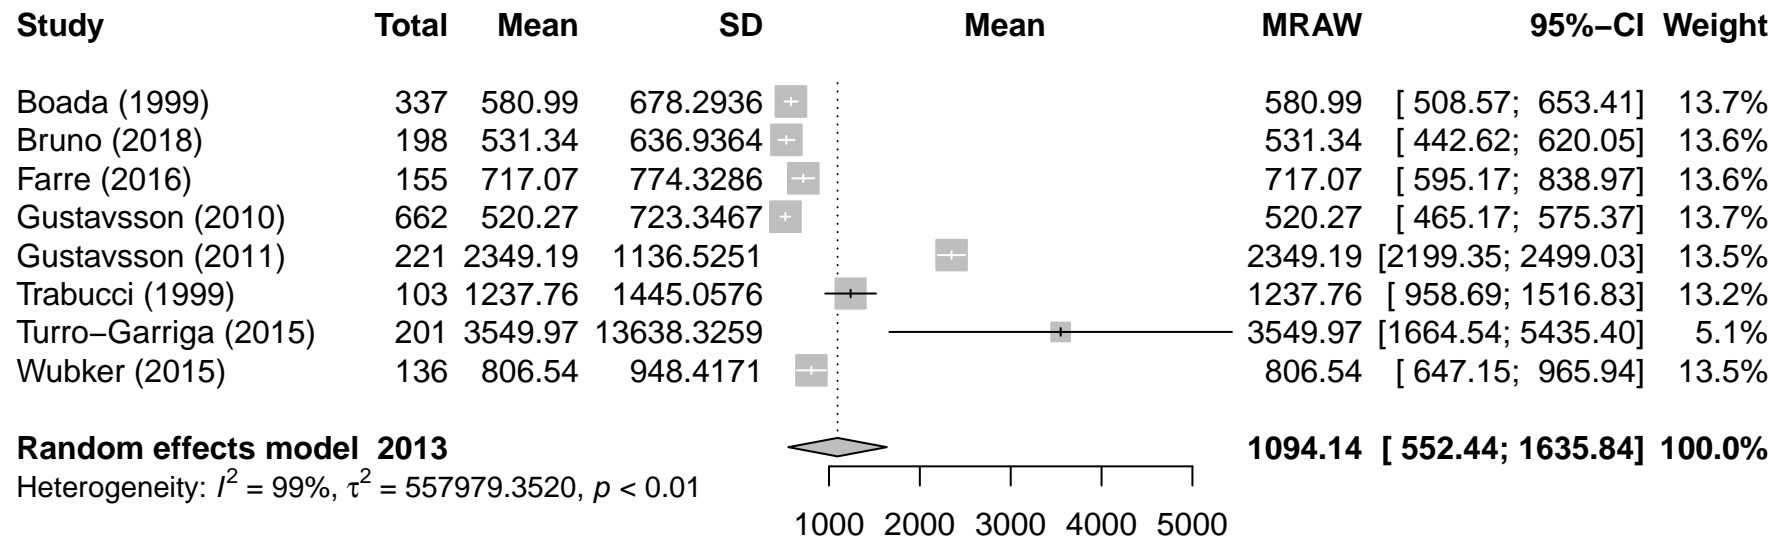

Southern Europe, Community, All, Institutional care

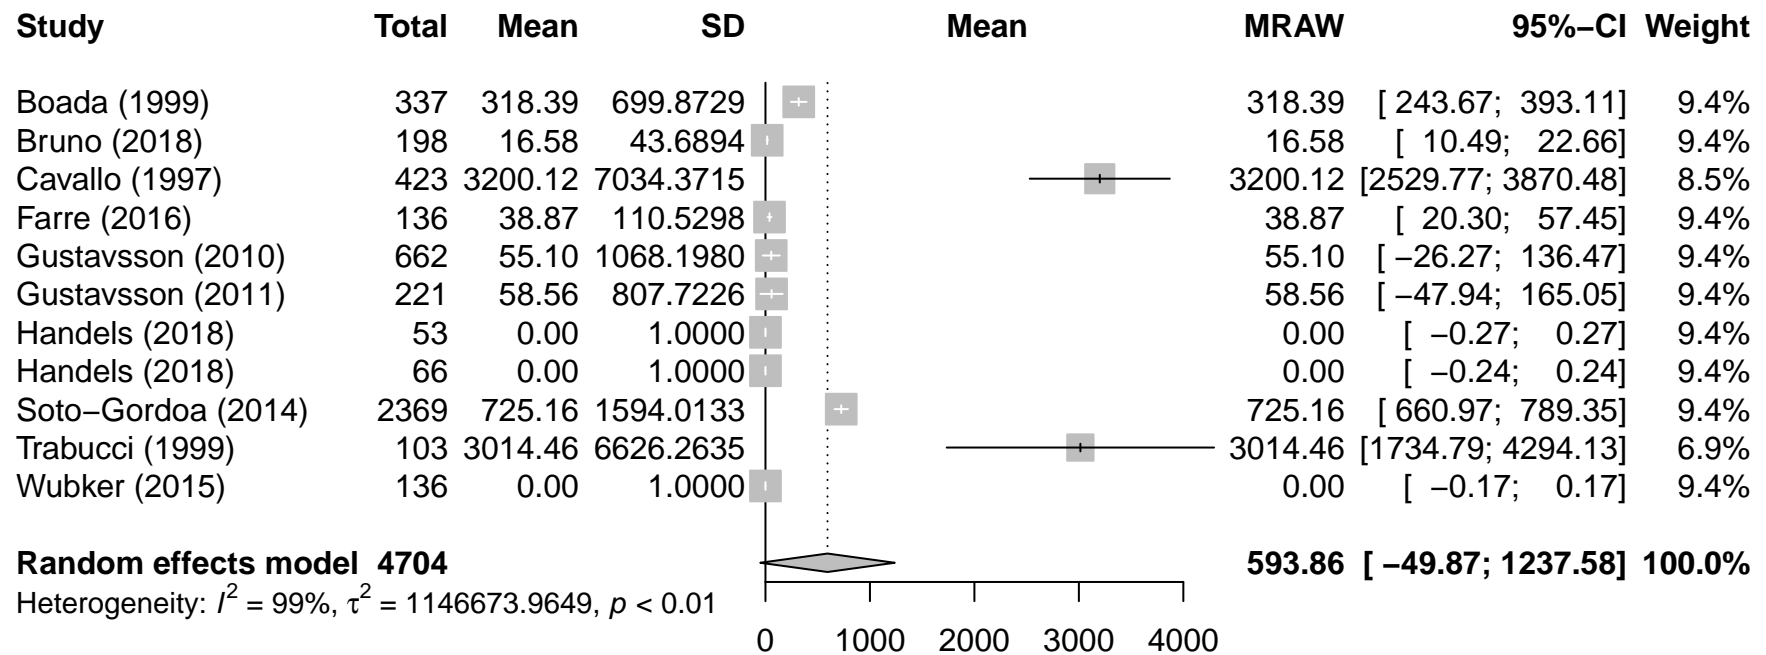

Southern Europe, Community, All, Community care

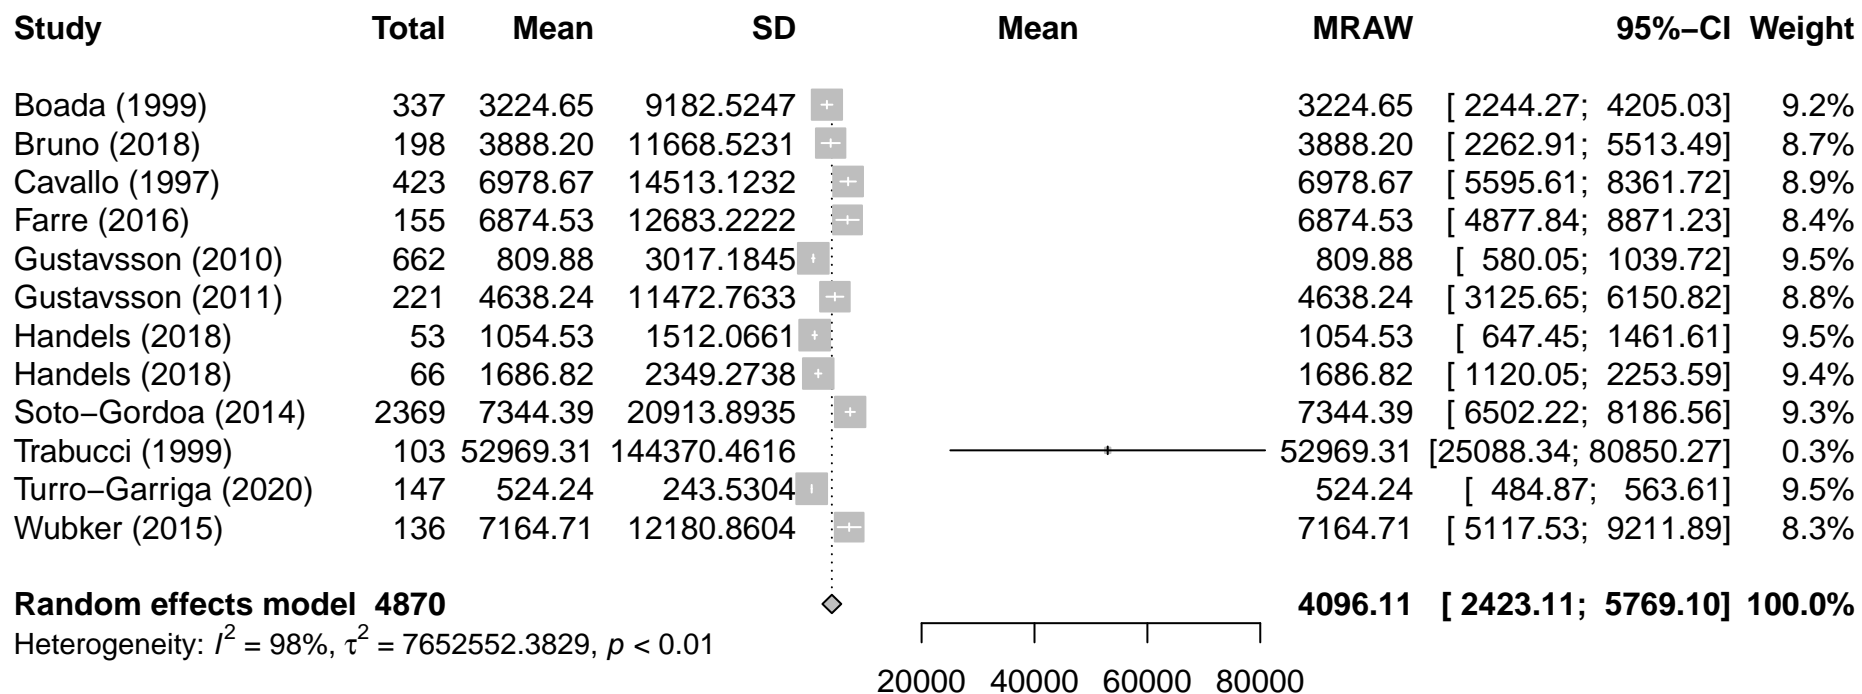

Southern Europe, Community, All, Caregiver work loss

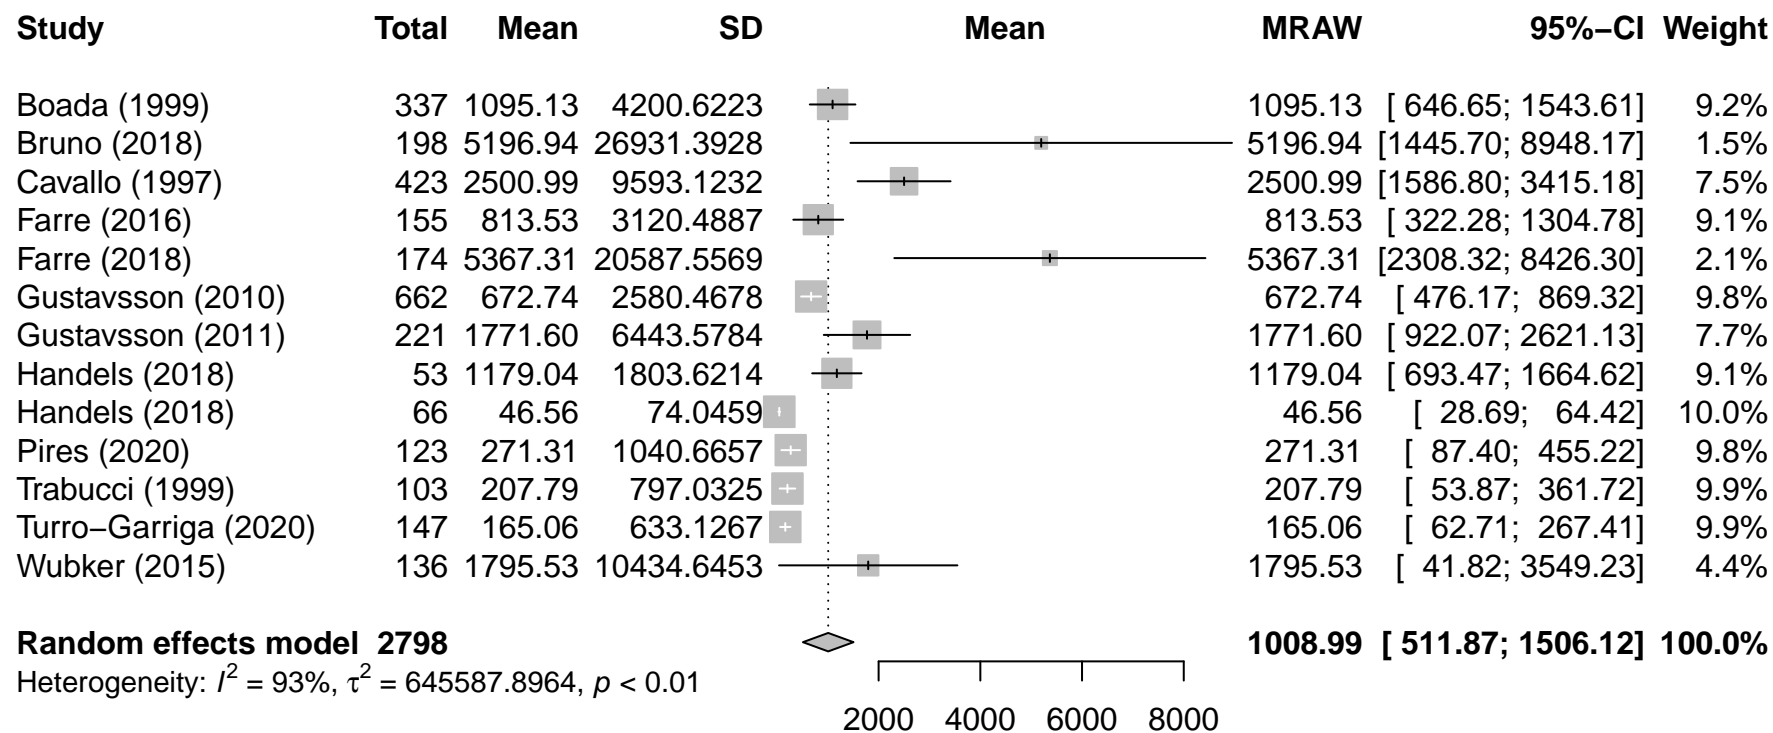

Southern Europe, Community, All, Caregiver time

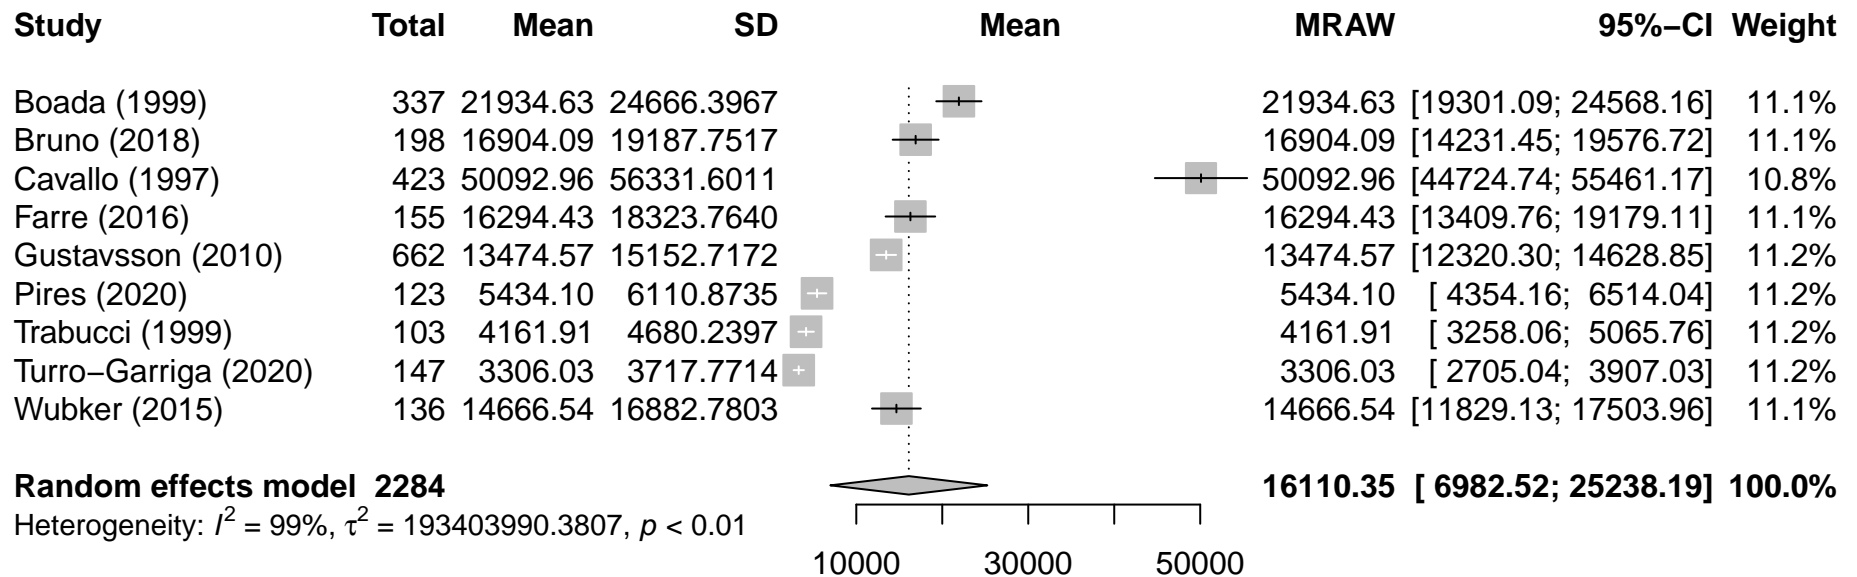



Southern Europe, Institution, Mild, Inpatient care

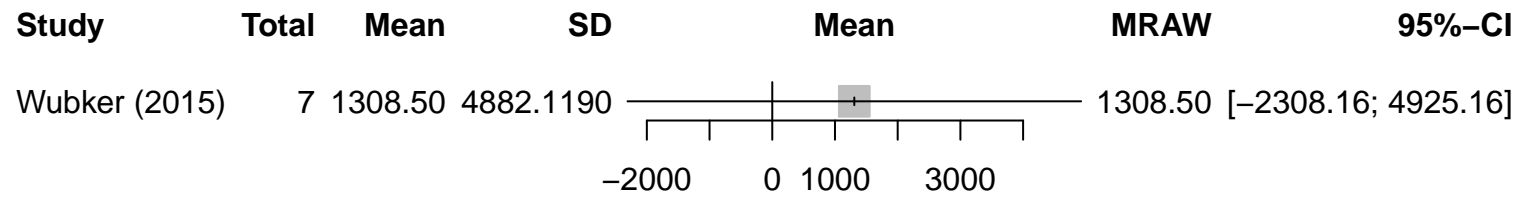

Southern Europe, Institution, Mild, Outpatient care

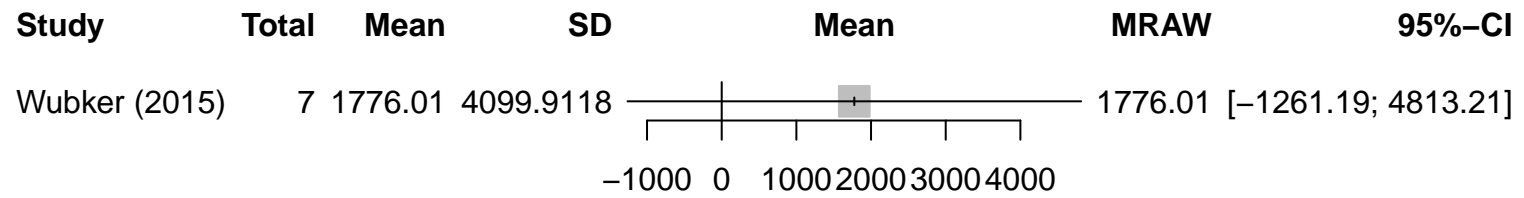

Southern Europe, Institution, Mild, Pharmaceuticals

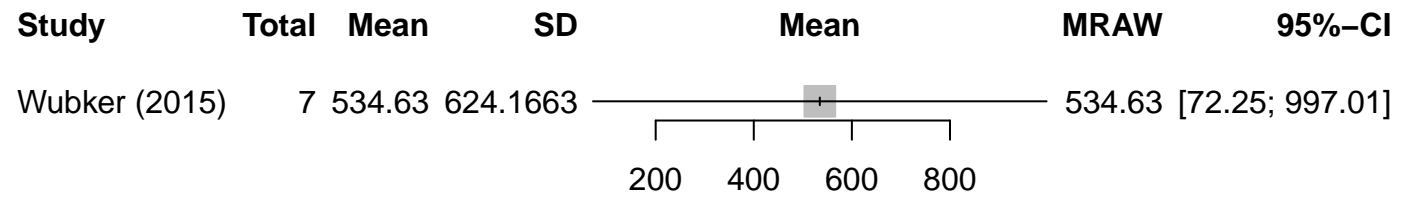

Southern Europe, Institution, Mild, Institutional care

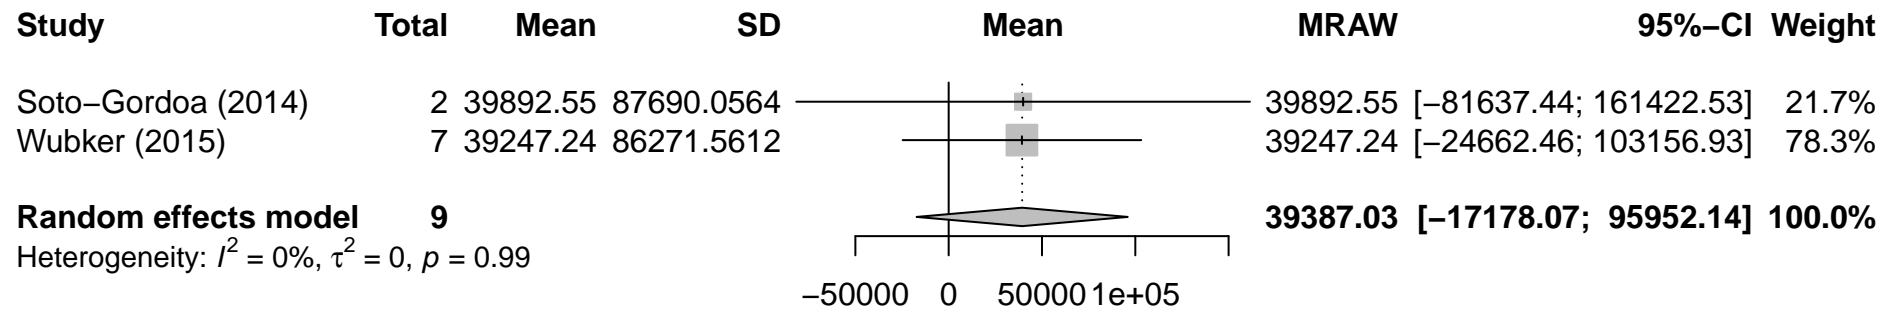

Southern Europe, Institution, Mild, Community care

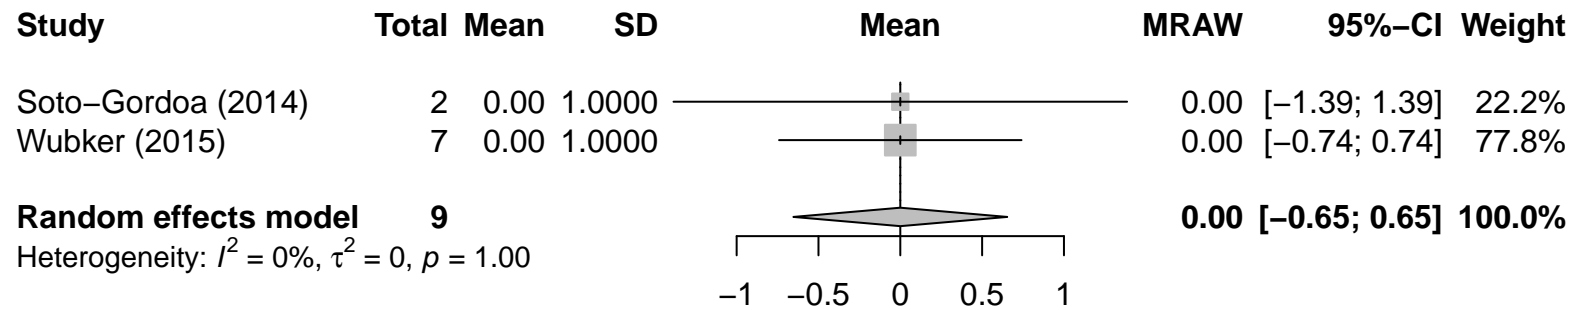

Southern Europe, Institution, Mild, Caregiver work loss

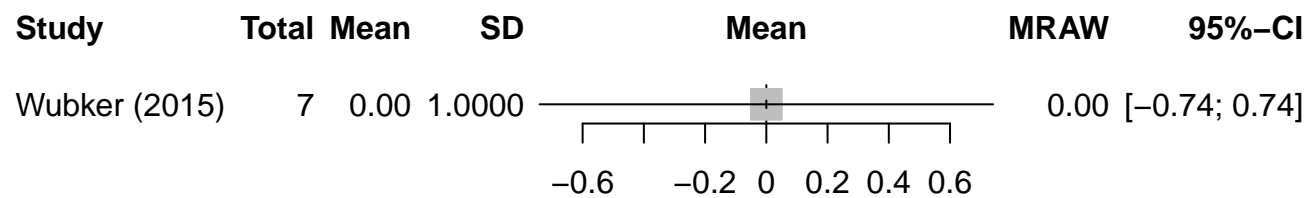

Southern Europe, Institution, Mild, Caregiver time

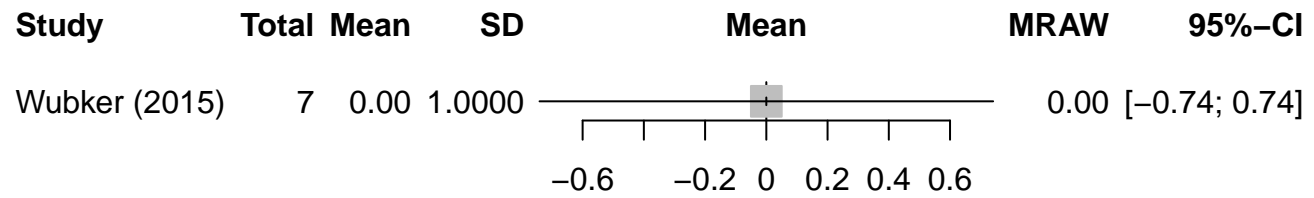

Southern Europe, Institution, Moderate, Inpatient care

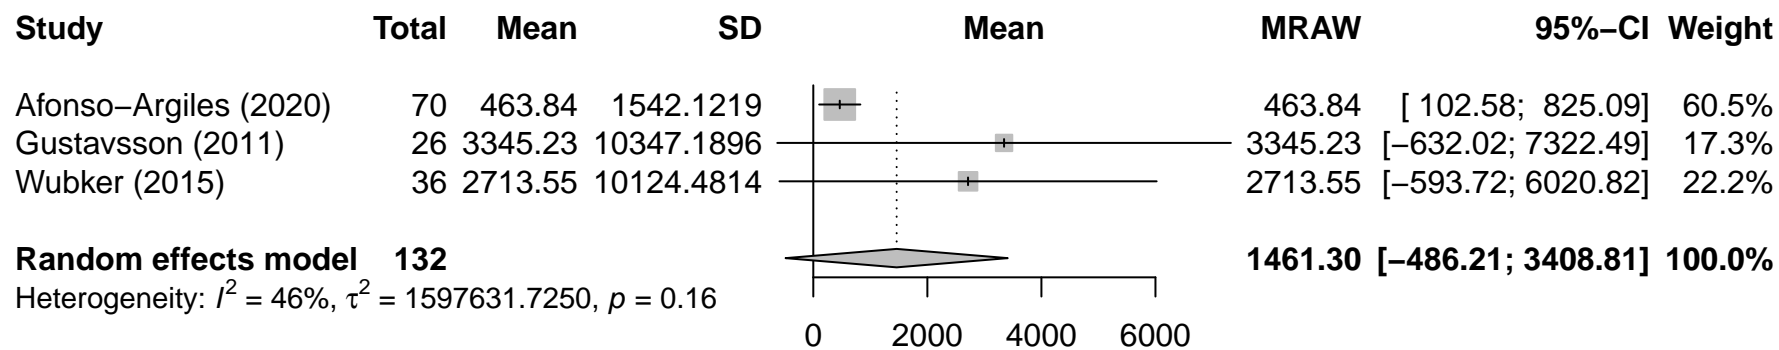



Southern Europe, Institution, Moderate, Outpatient care

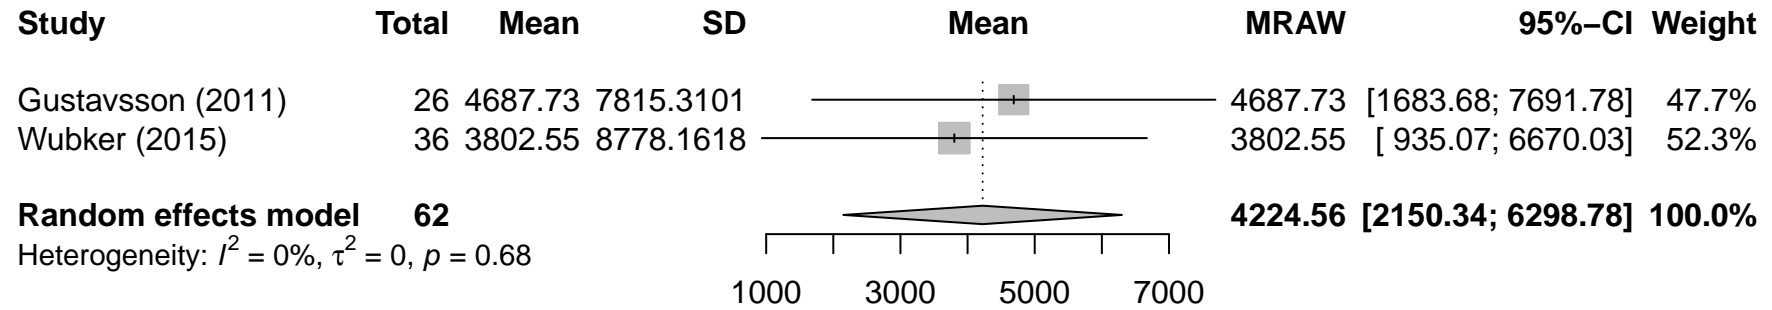

Southern Europe, Institution, Moderate, Pharmaceuticals

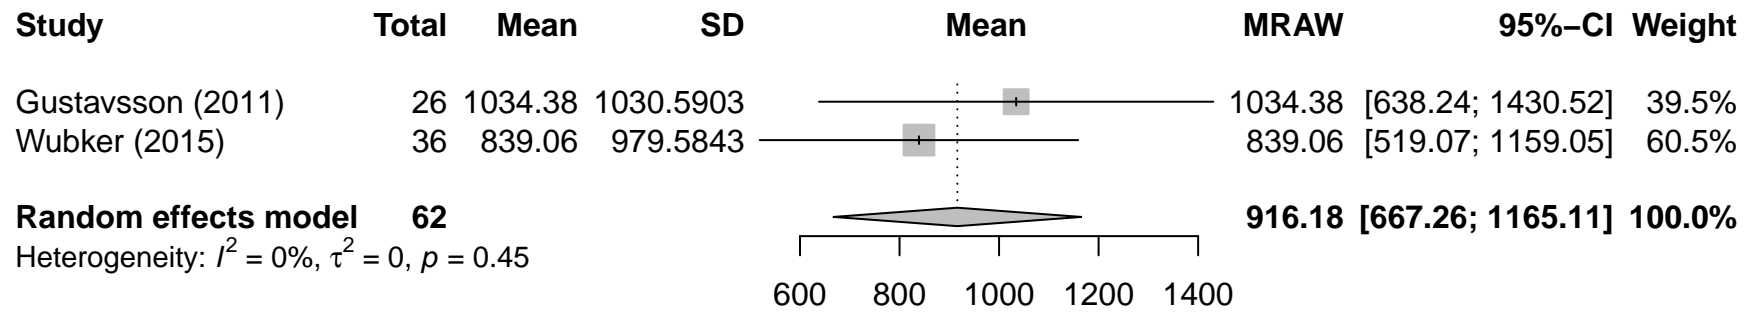

Southern Europe, Institution, Moderate, Institutional care

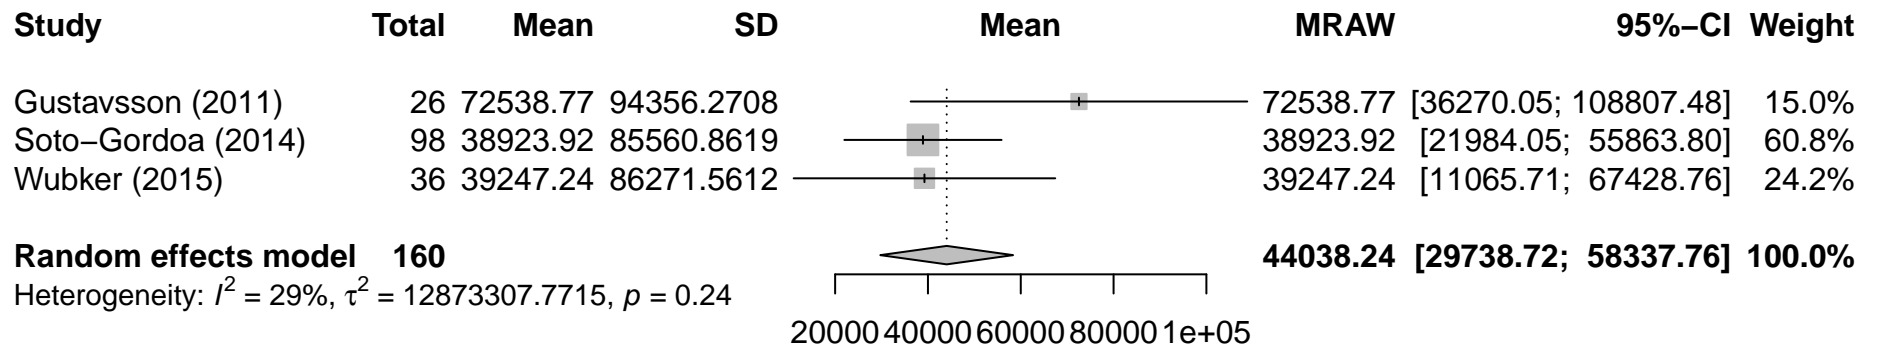

Southern Europe, Institution, Moderate, Community care

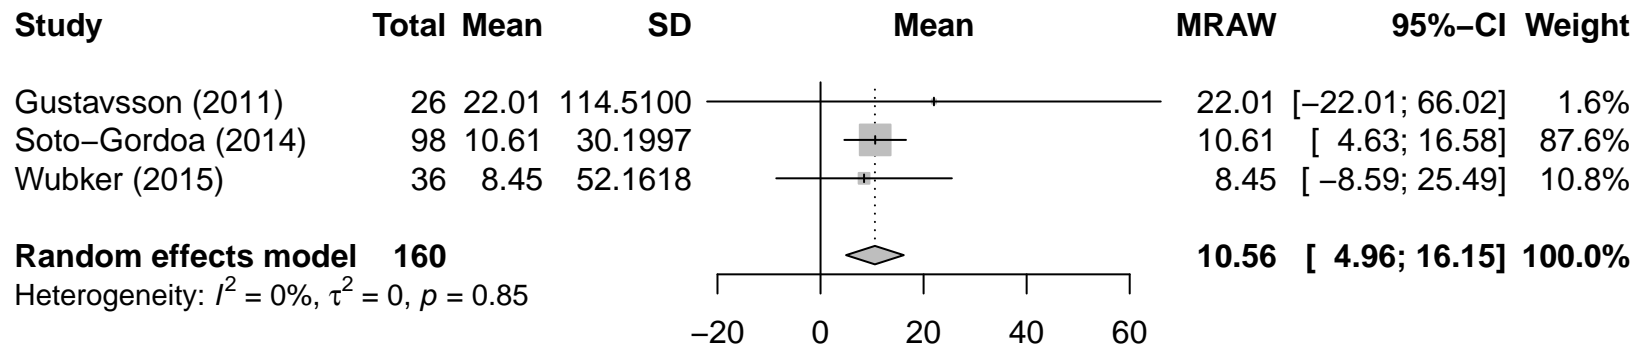

Southern Europe, Institution, Moderate, Caregiver work loss

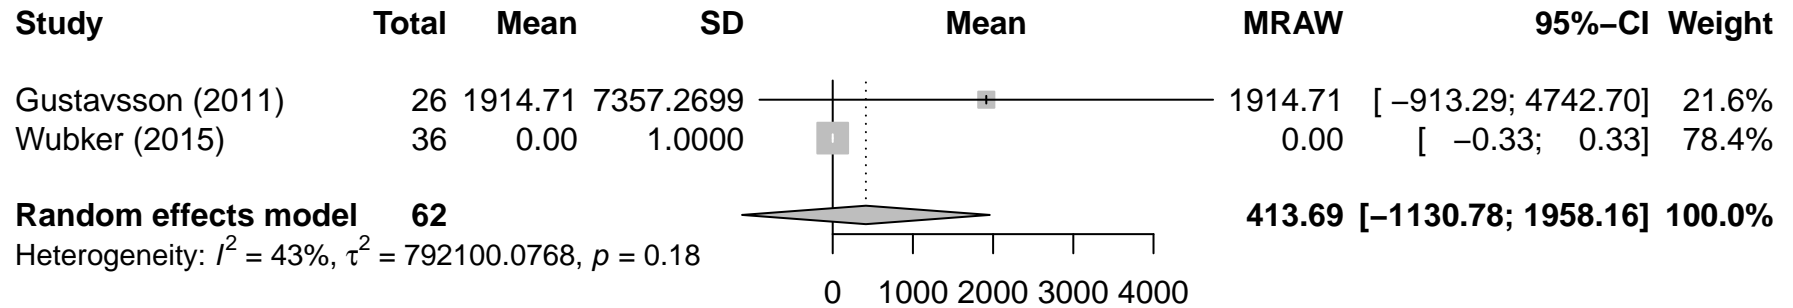

Southern Europe, Institution, Moderate, Caregiver time

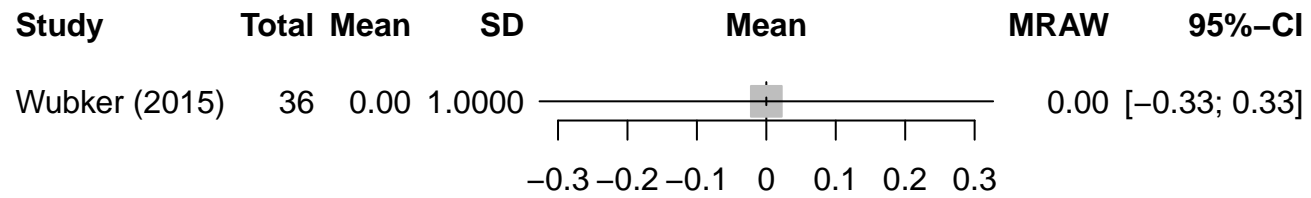

Southern Europe, Institution, Severe, Inpatient care

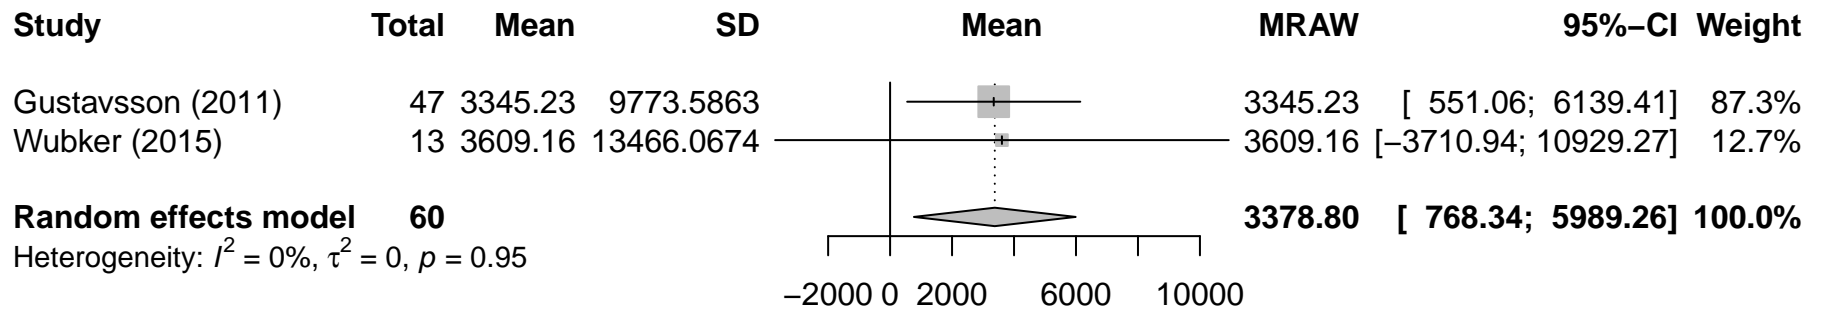

Southern Europe, Institution, Severe, Outpatient care

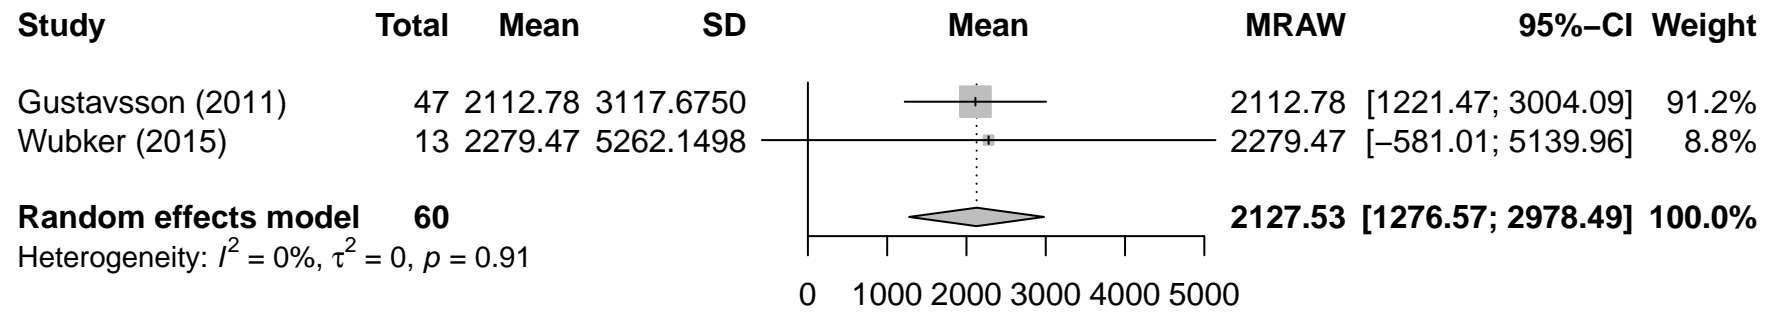



Southern Europe, Institution, Severe, Pharmaceuticals

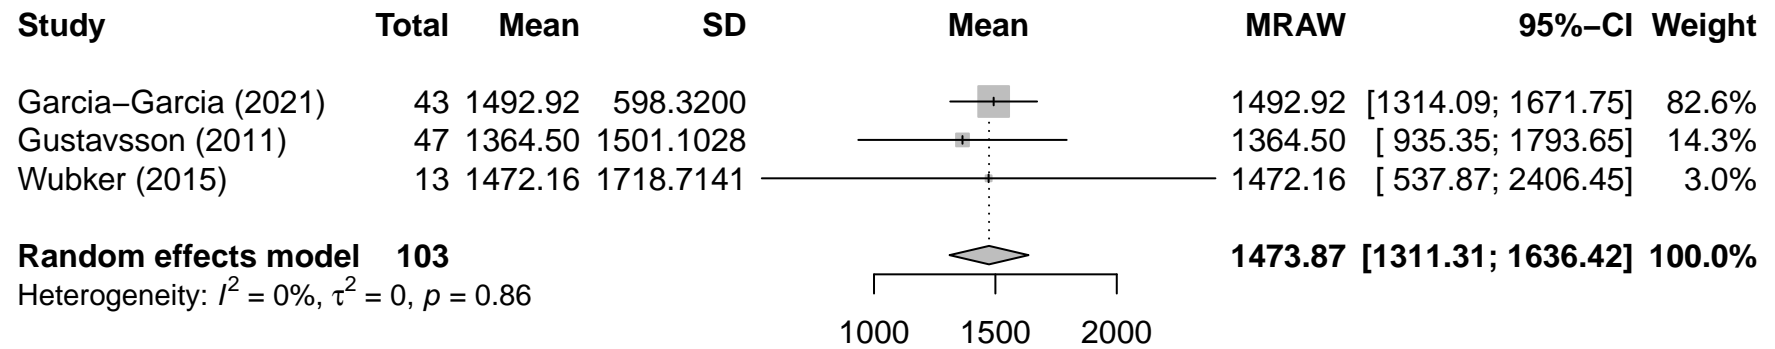

Southern Europe, Institution, Severe, Institutional care

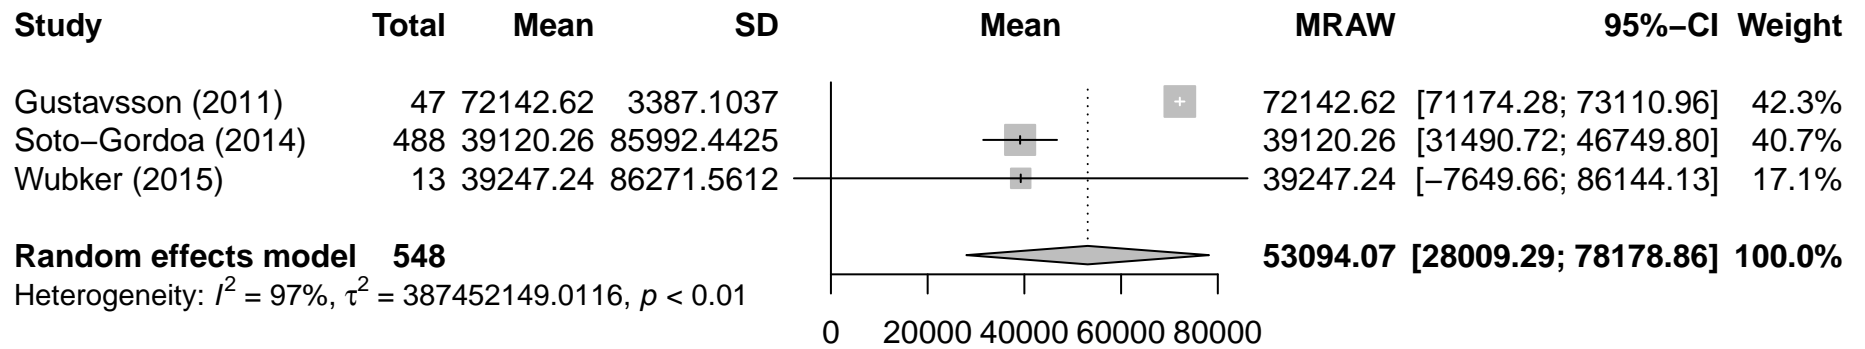

Southern Europe, Institution, Severe, Community care

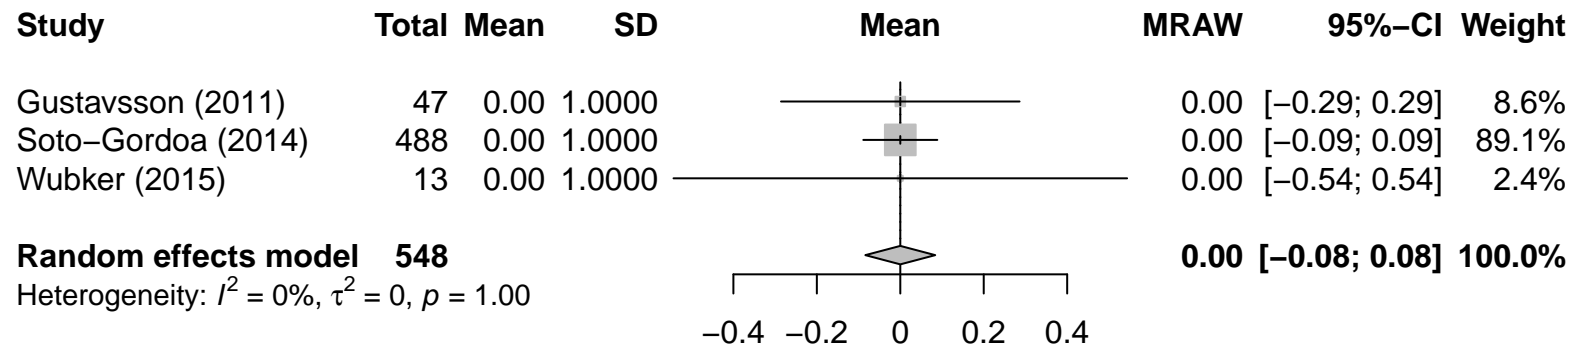

Southern Europe, Institution, Severe, Caregiver work loss

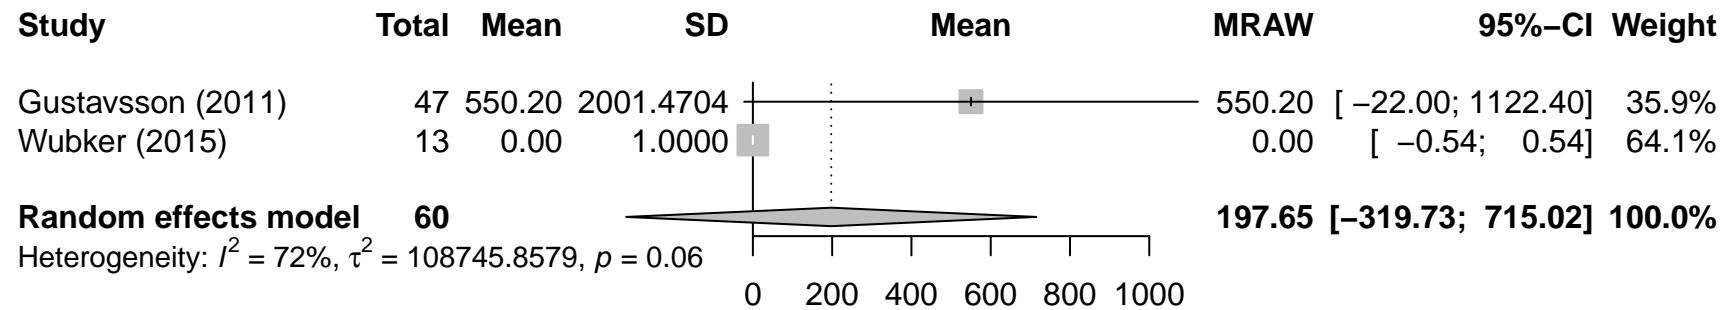

Southern Europe, Institution, Severe, Caregiver time

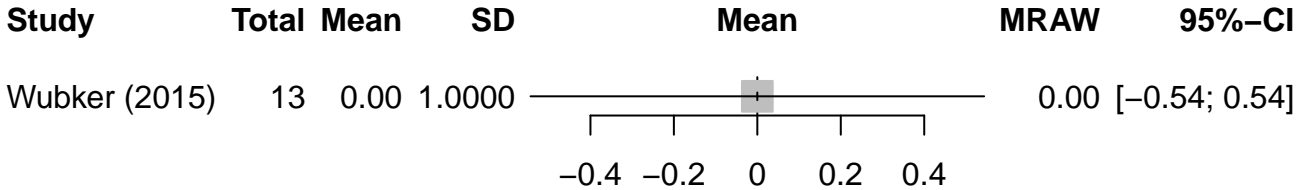

Southern Europe, Institution, All, Inpatient care

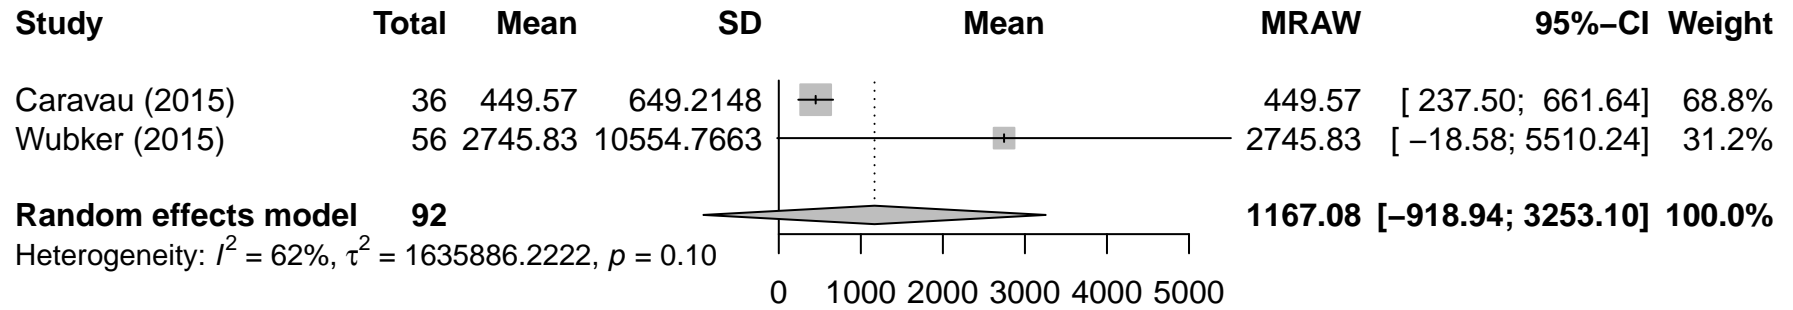

Southern Europe, Institution, All, Outpatient care

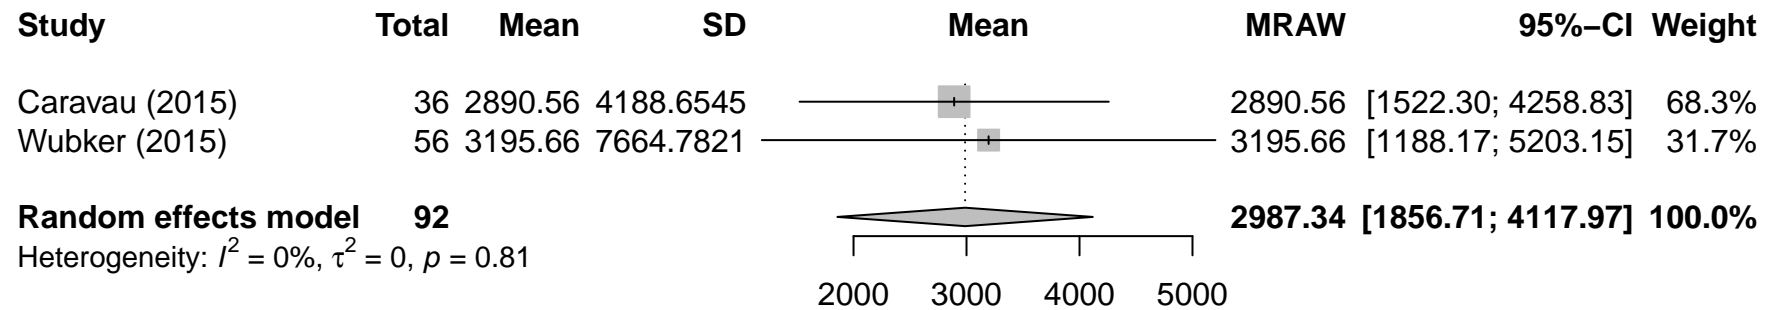

Southern Europe, Institution, All, Pharmaceuticals

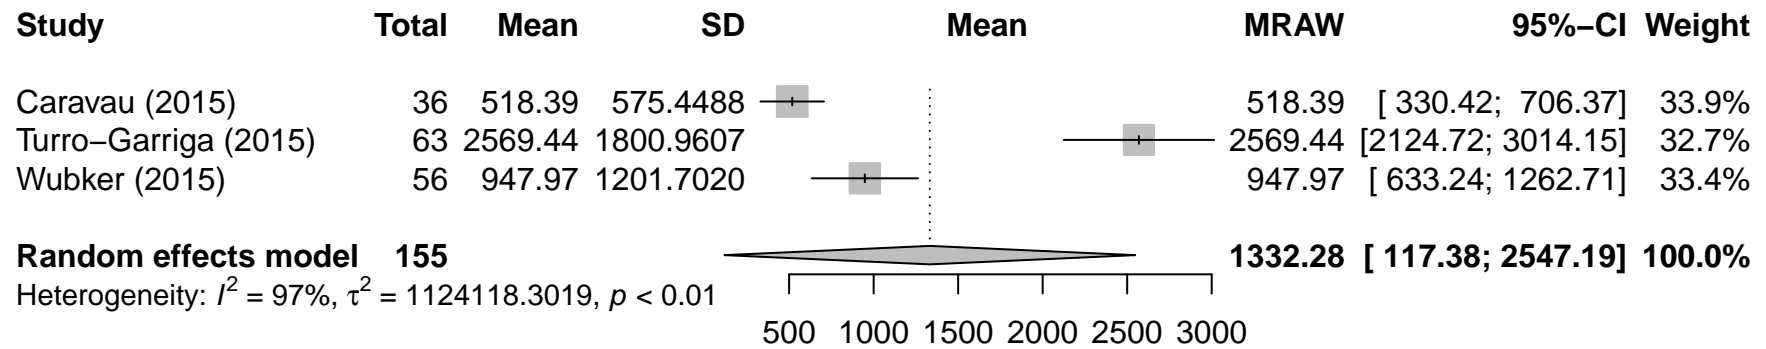



Southern Europe, Institution, All, Institutional care

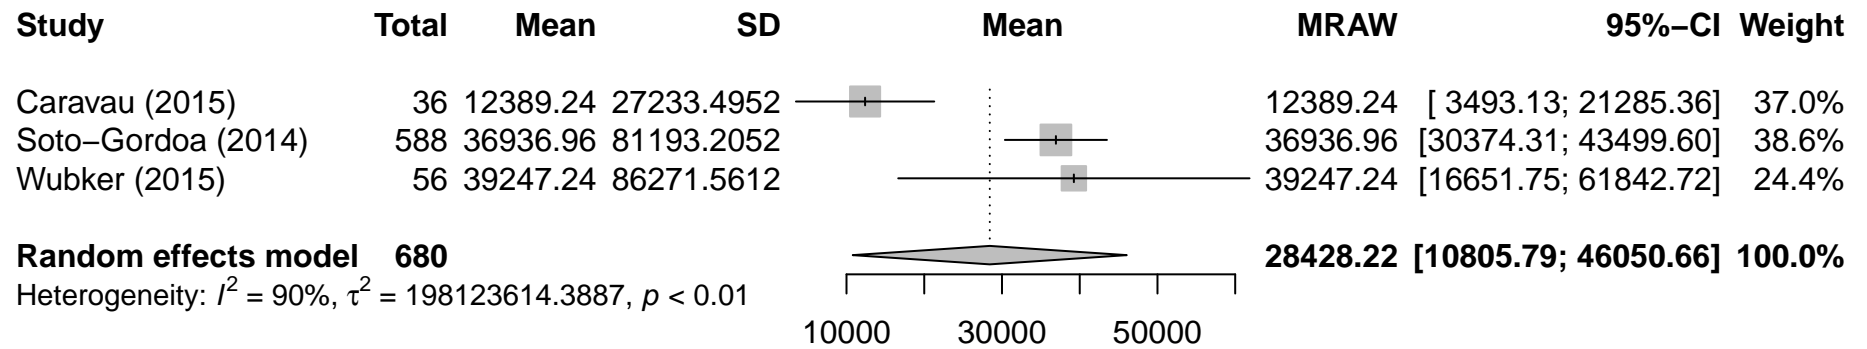

Southern Europe, Institution, All, Community care

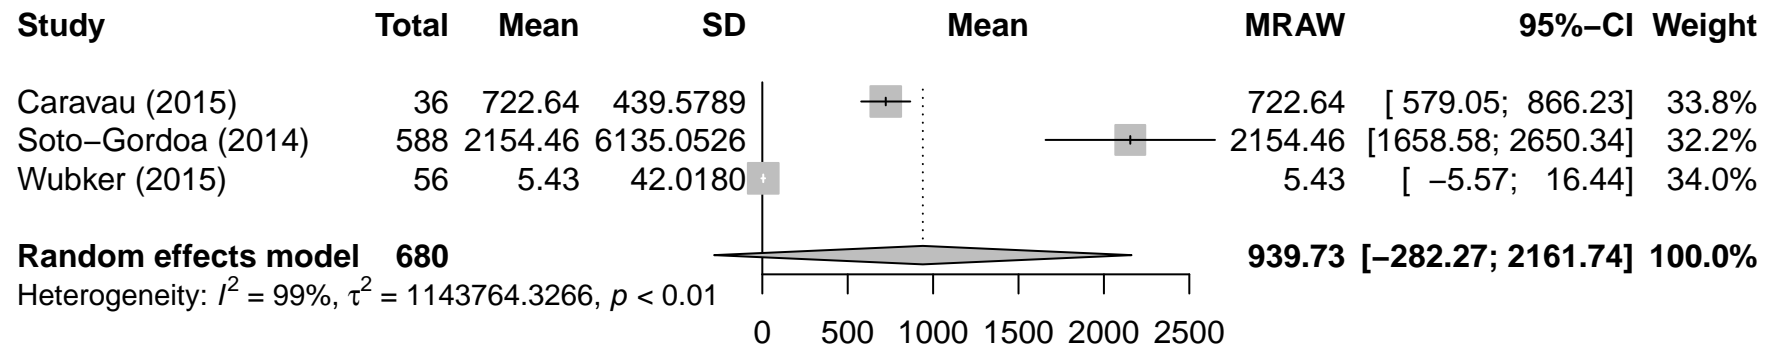

Southern Europe, Institution, All, Caregiver work loss

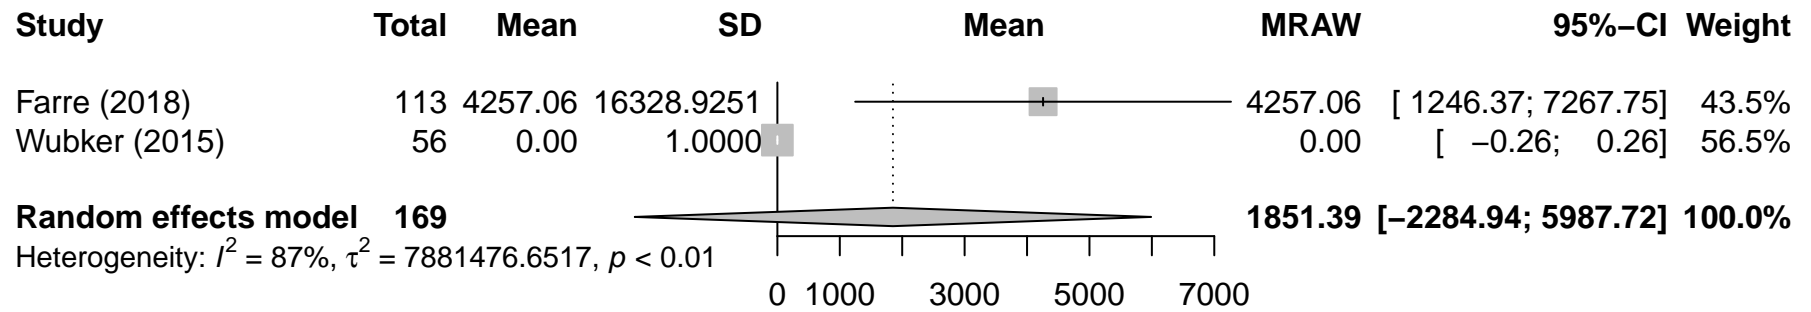

Southern Europe, Institution, All, Caregiver time

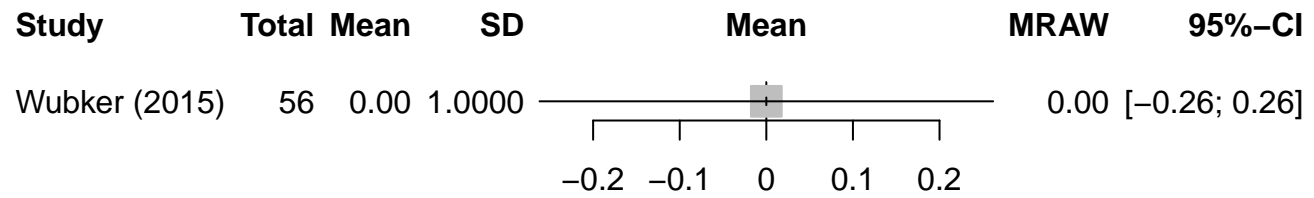

Southern Europe, All, Mild, Inpatient care

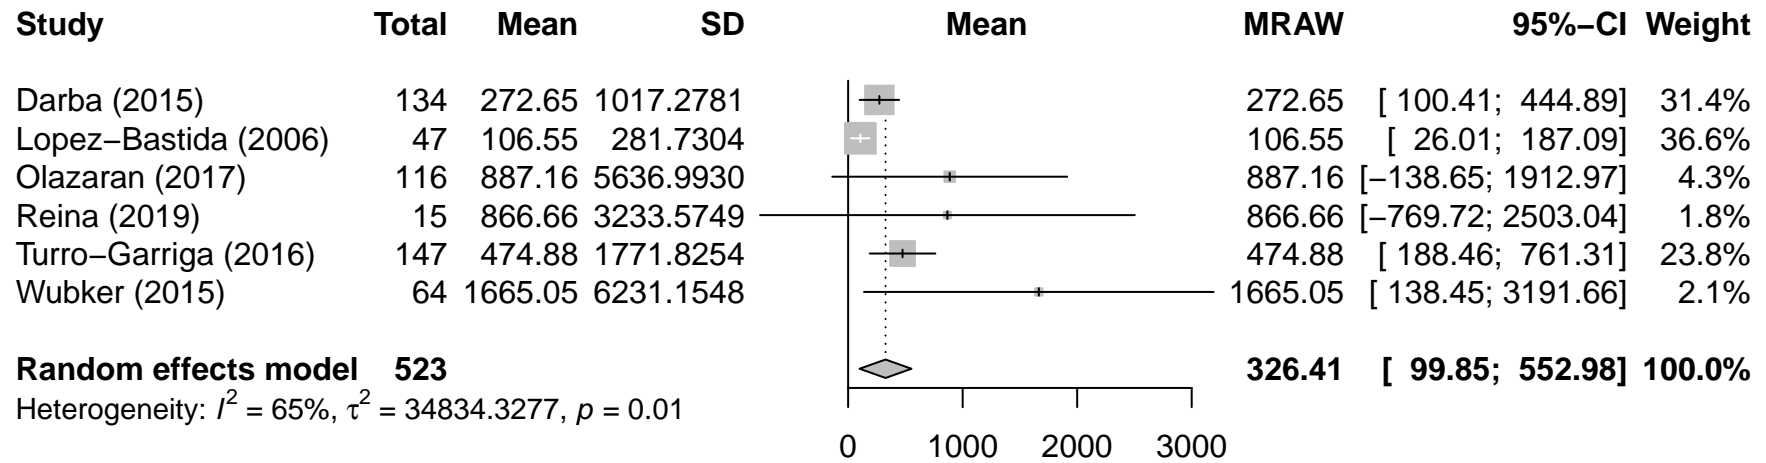

Southern Europe, All, Mild, Outpatient care

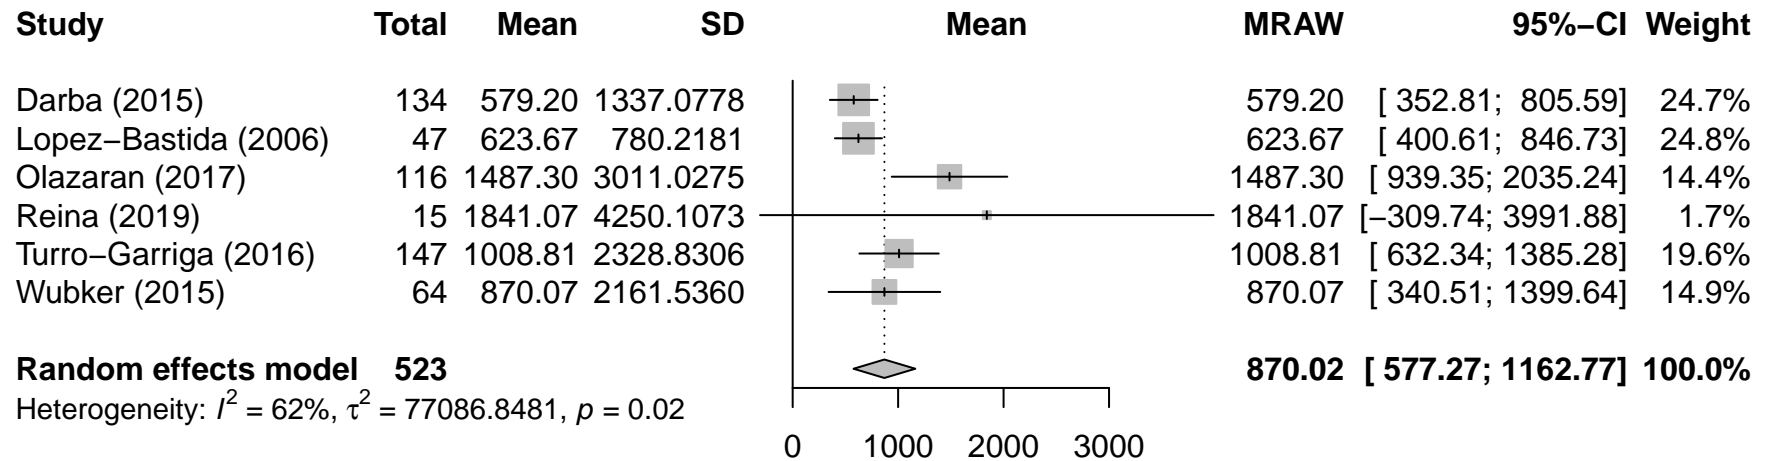

Southern Europe, All, Mild, Pharmaceuticals

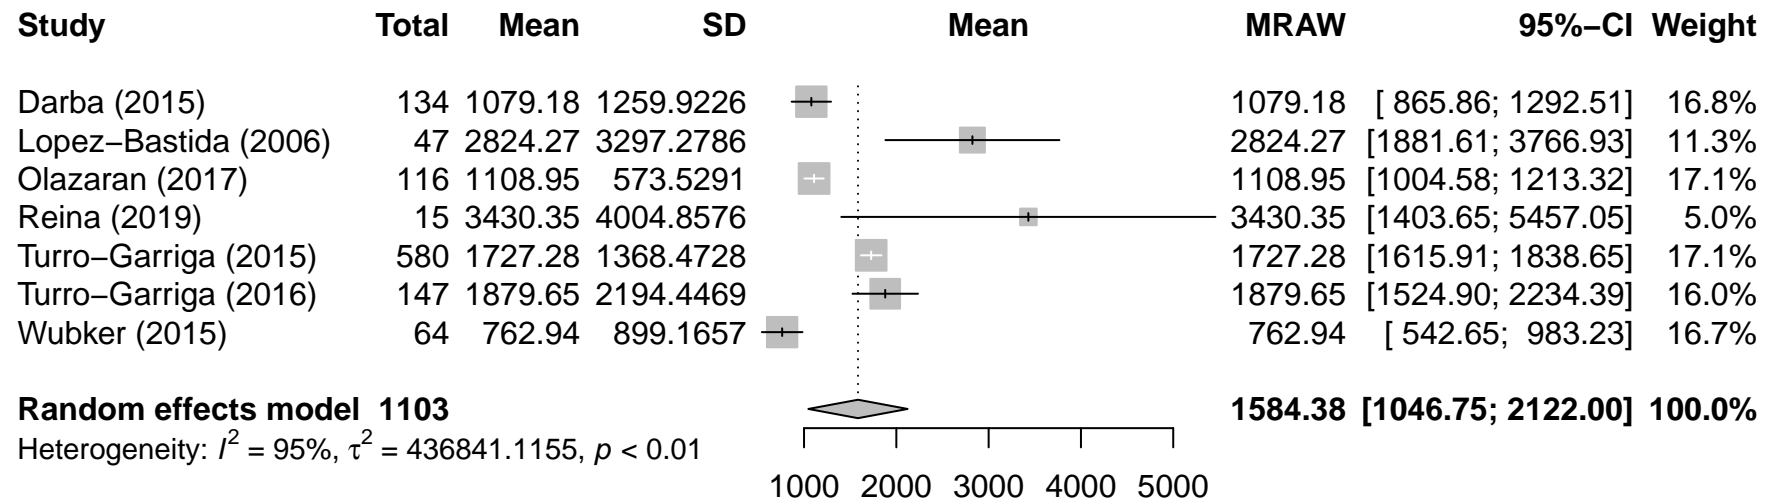

Southern Europe, All, Mild, Institutional care

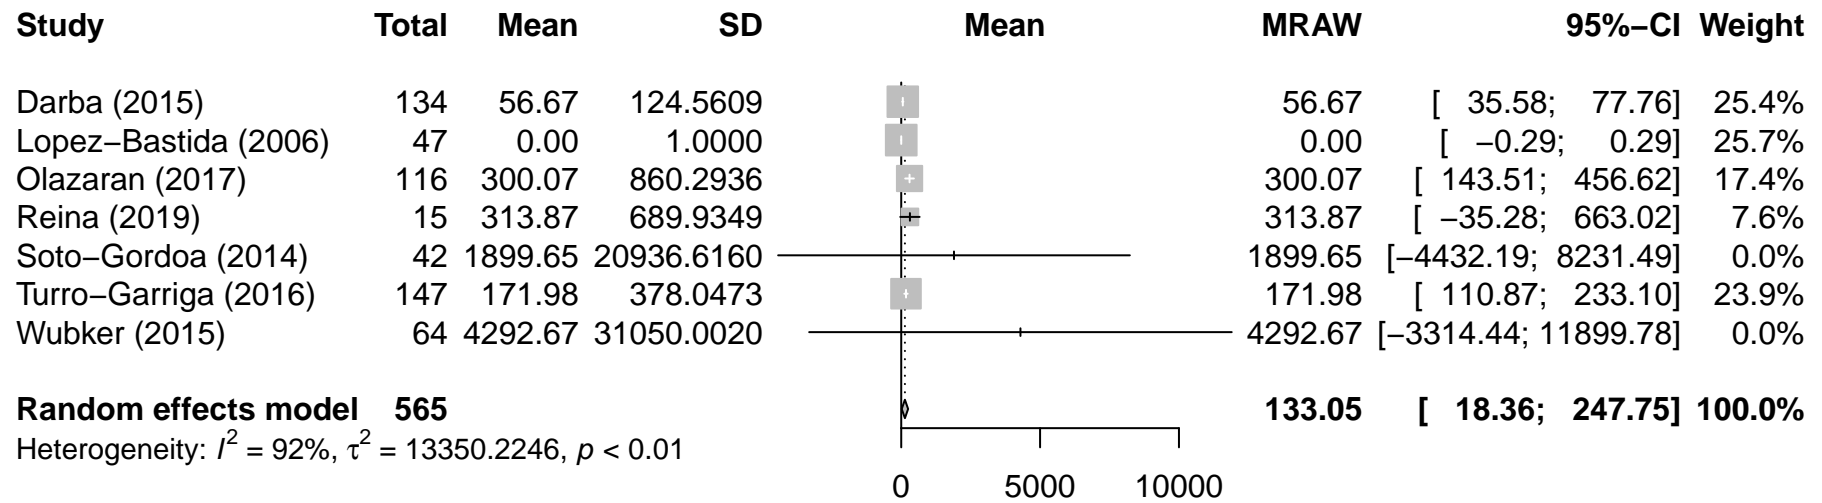



Southern Europe, All, Mild, Community care

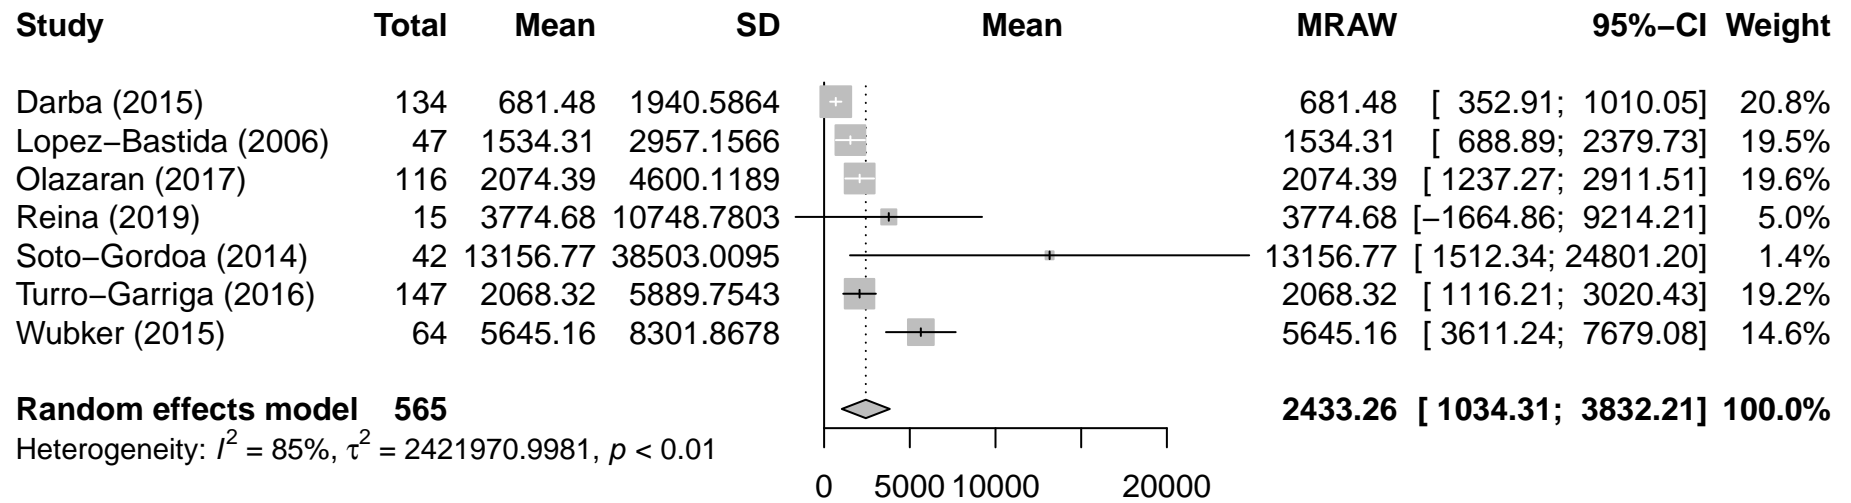

Southern Europe, All, Mild, Caregiver work loss

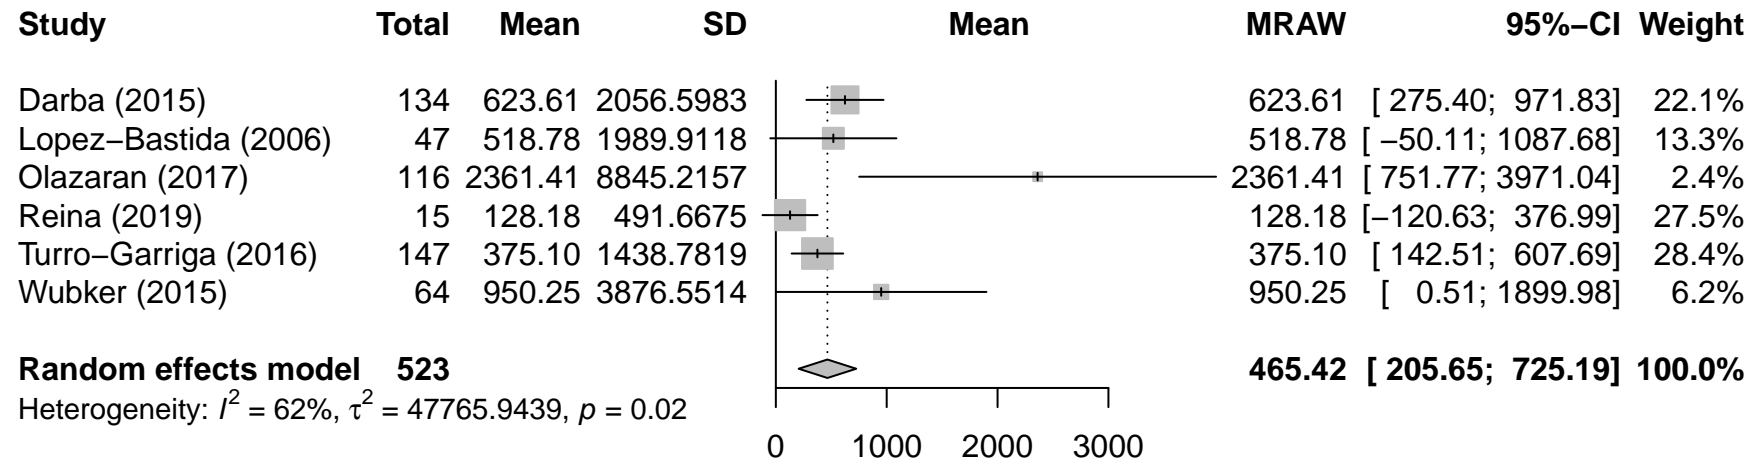

Southern Europe, All, Mild, Caregiver time

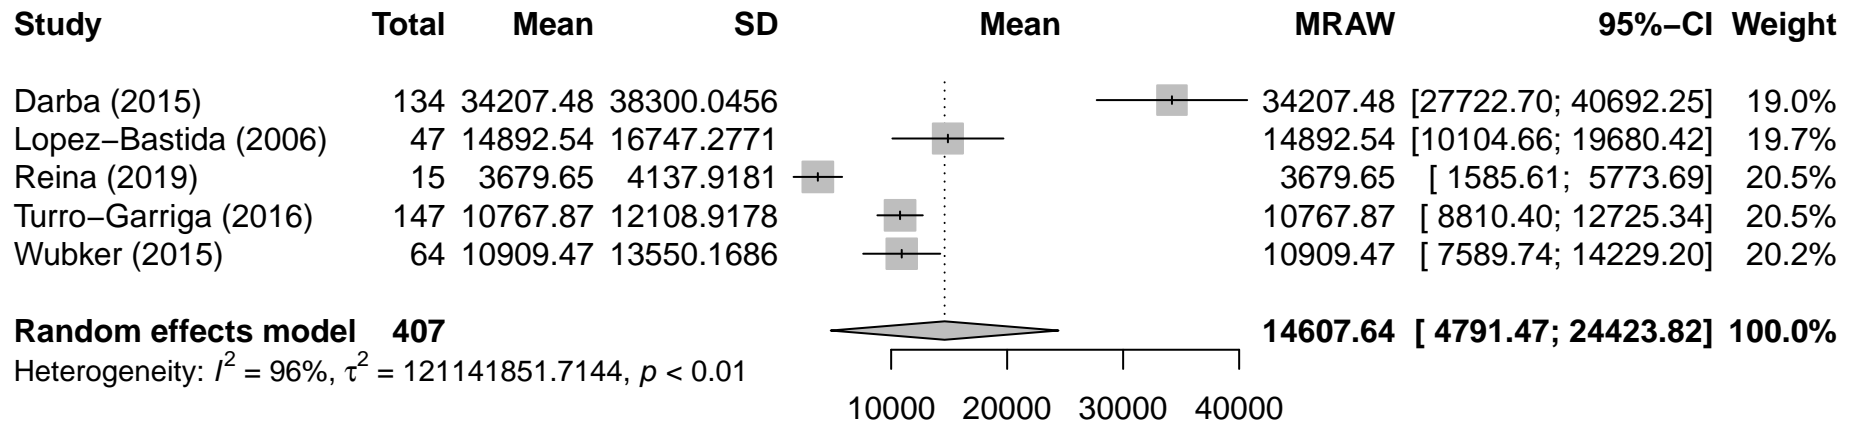

Southern Europe, All, Moderate, Inpatient care

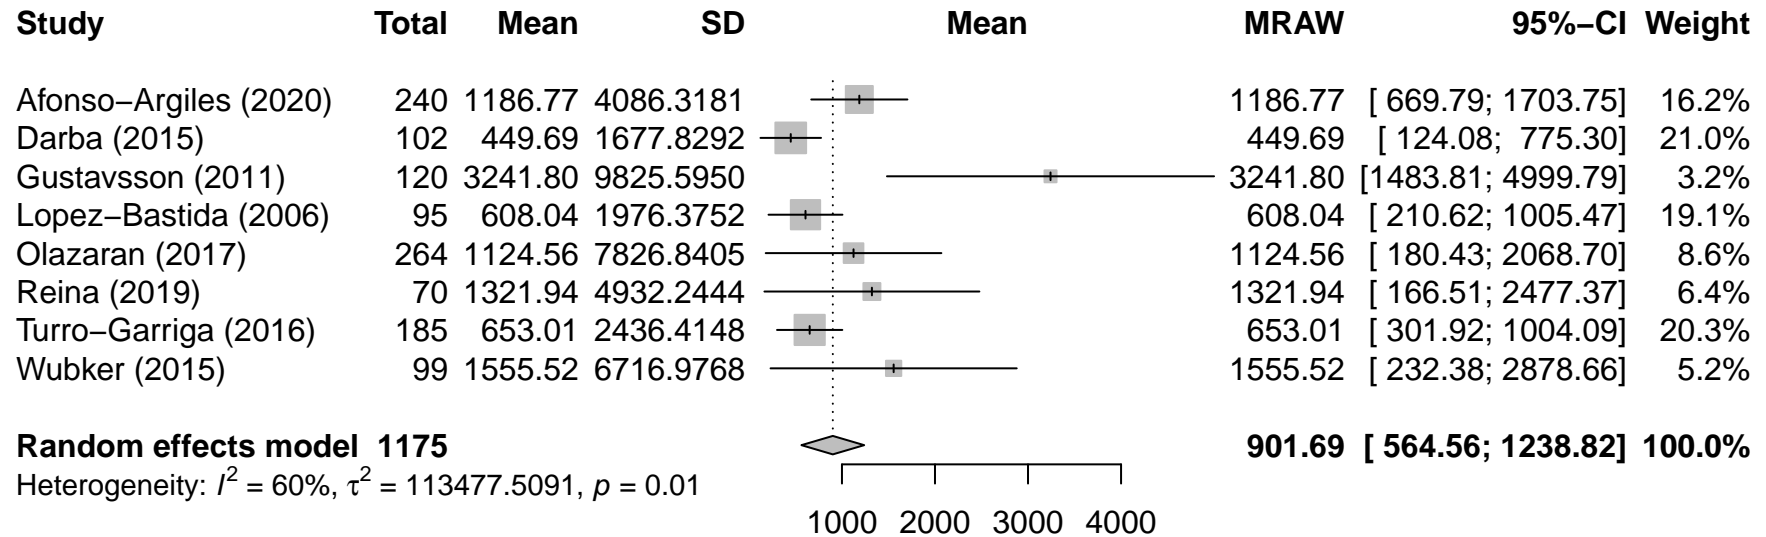

Southern Europe, All, Moderate, Outpatient care

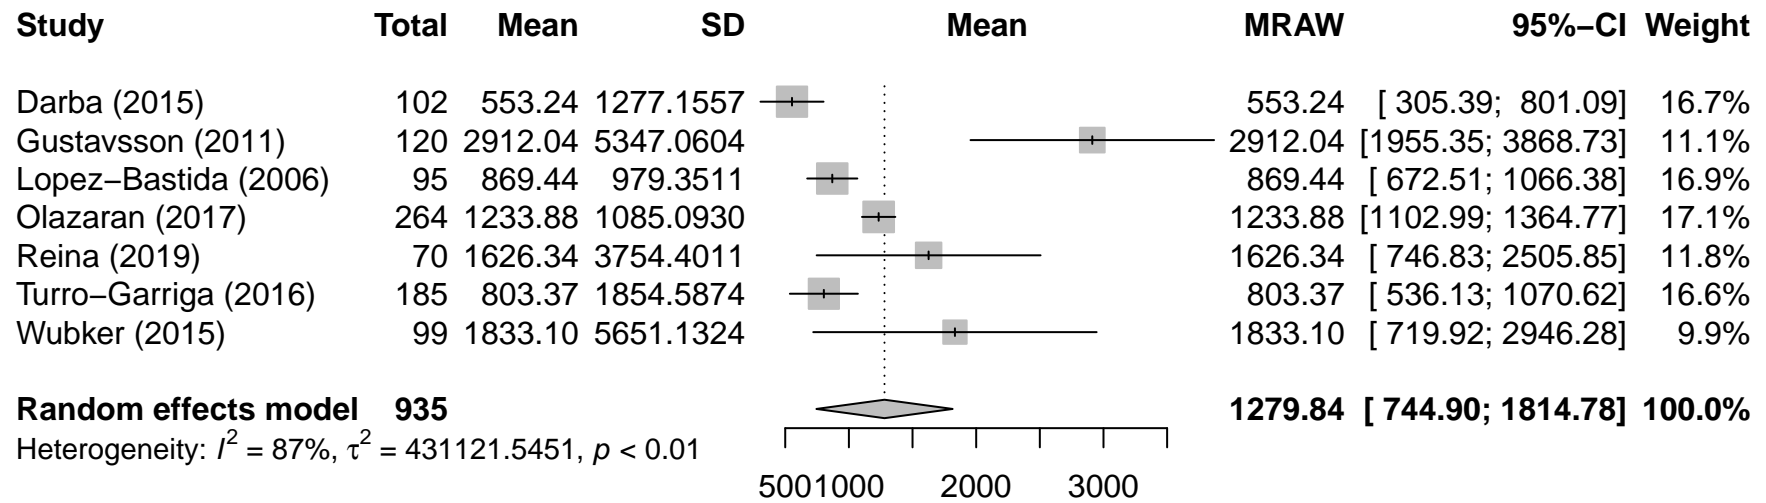

Southern Europe, All, Moderate, Pharmaceuticals

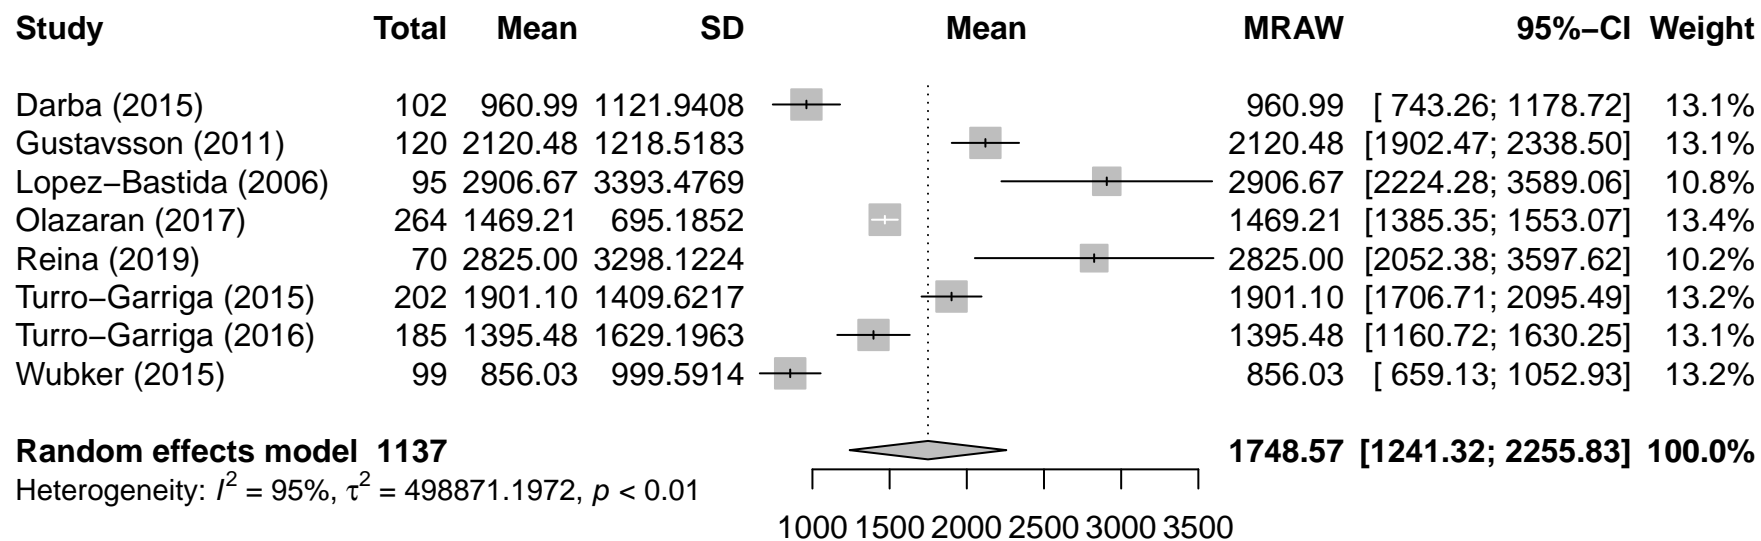

Southern Europe, All, Moderate, Institutional care

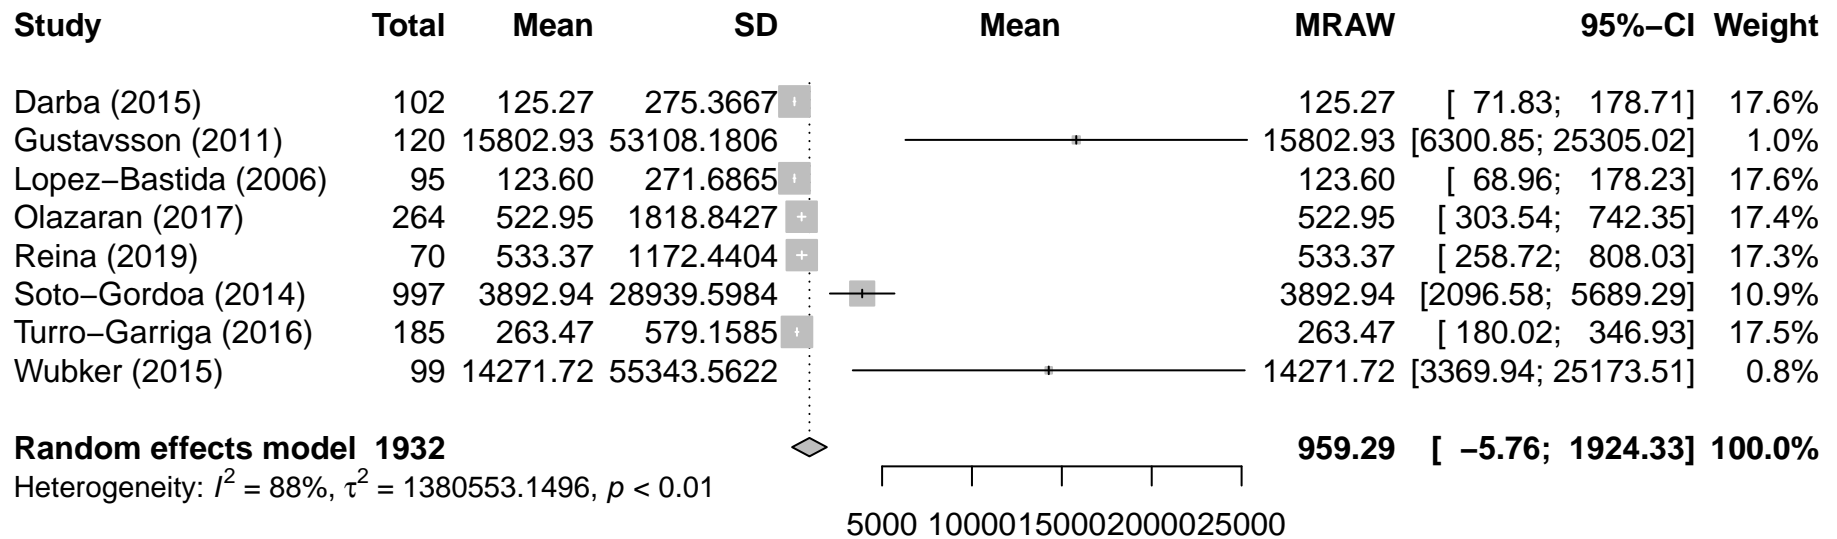

Southern Europe, All, Moderate, Community care

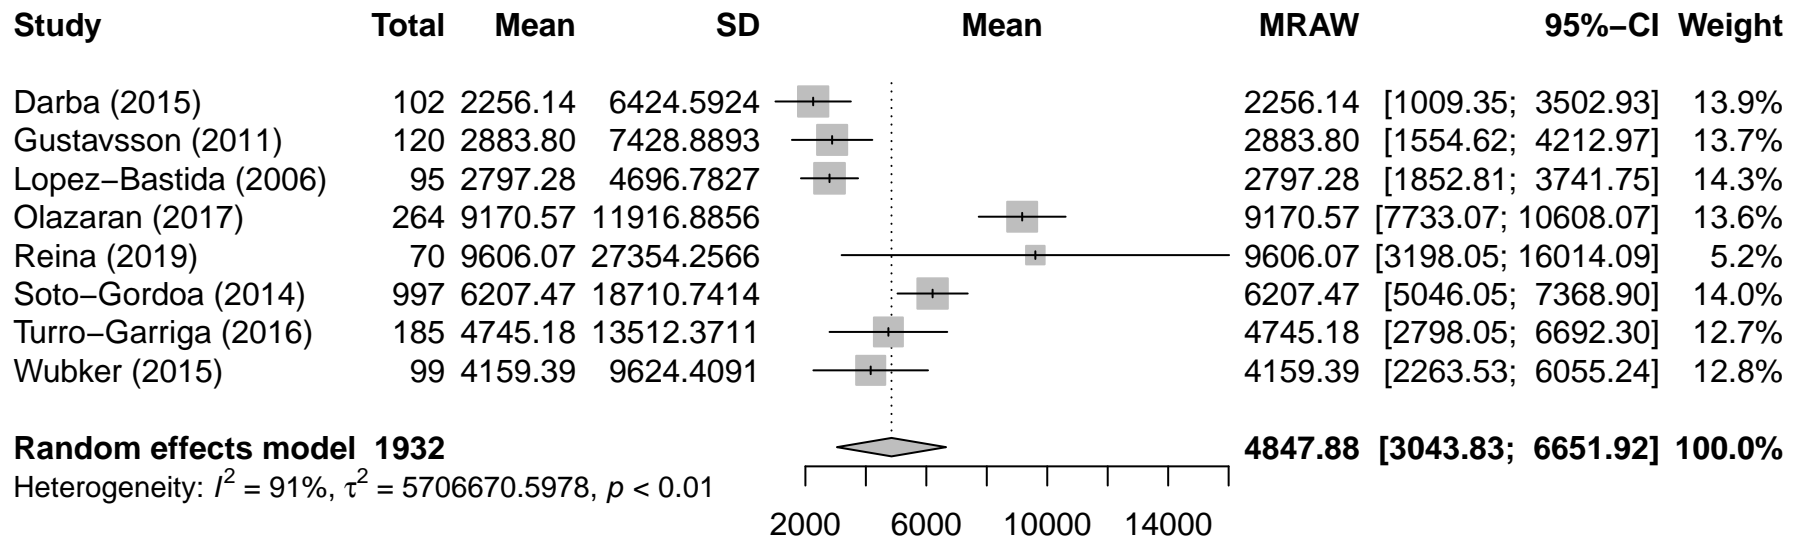



Southern Europe, All, Moderate, Caregiver work loss

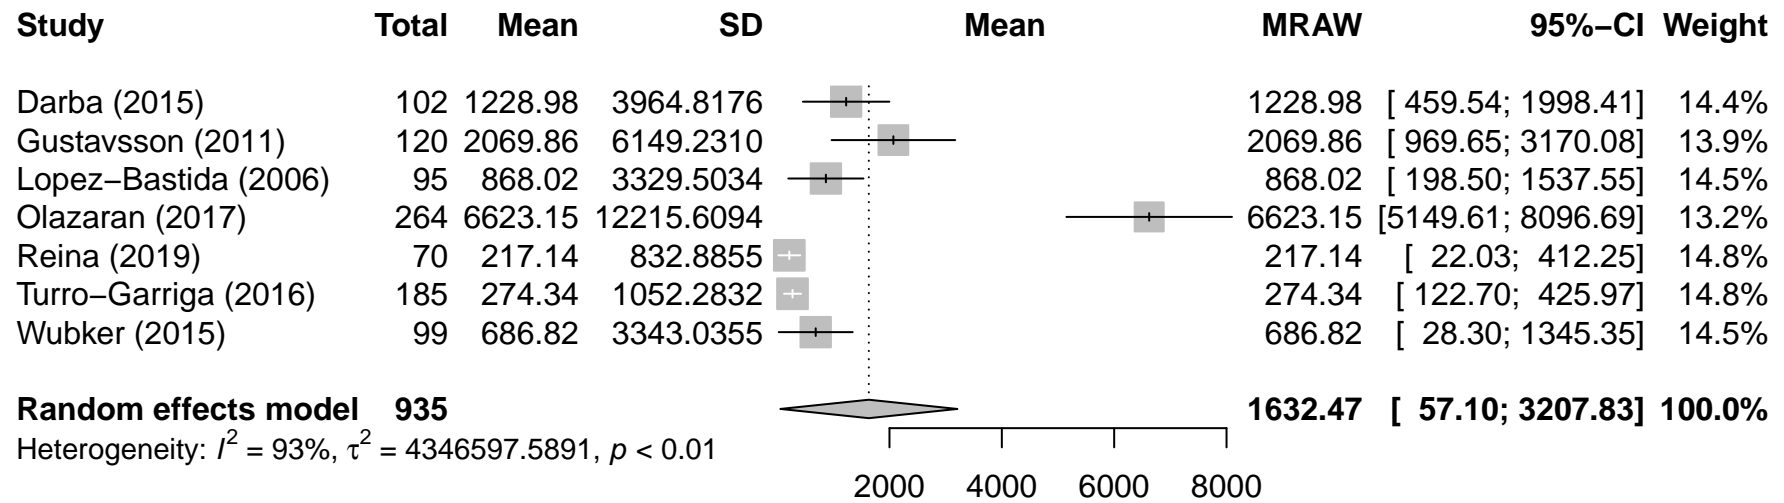

Southern Europe, All, Moderate, Caregiver time

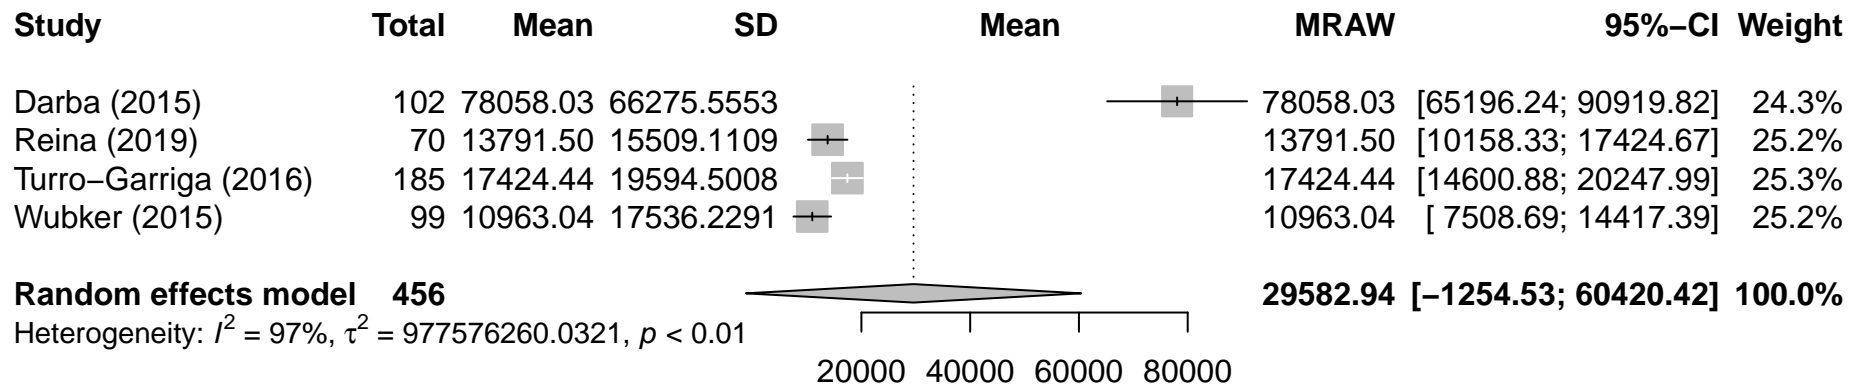

Southern Europe, All, Severe, Inpatient care

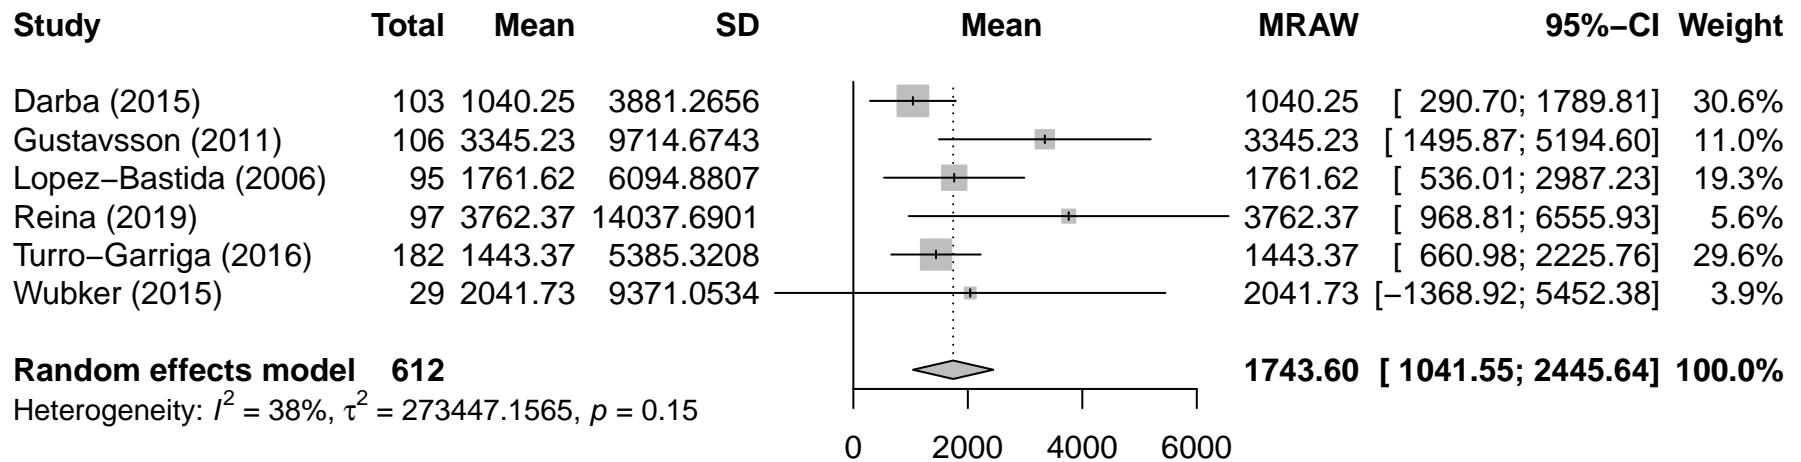

Southern Europe, All, Severe, Outpatient care

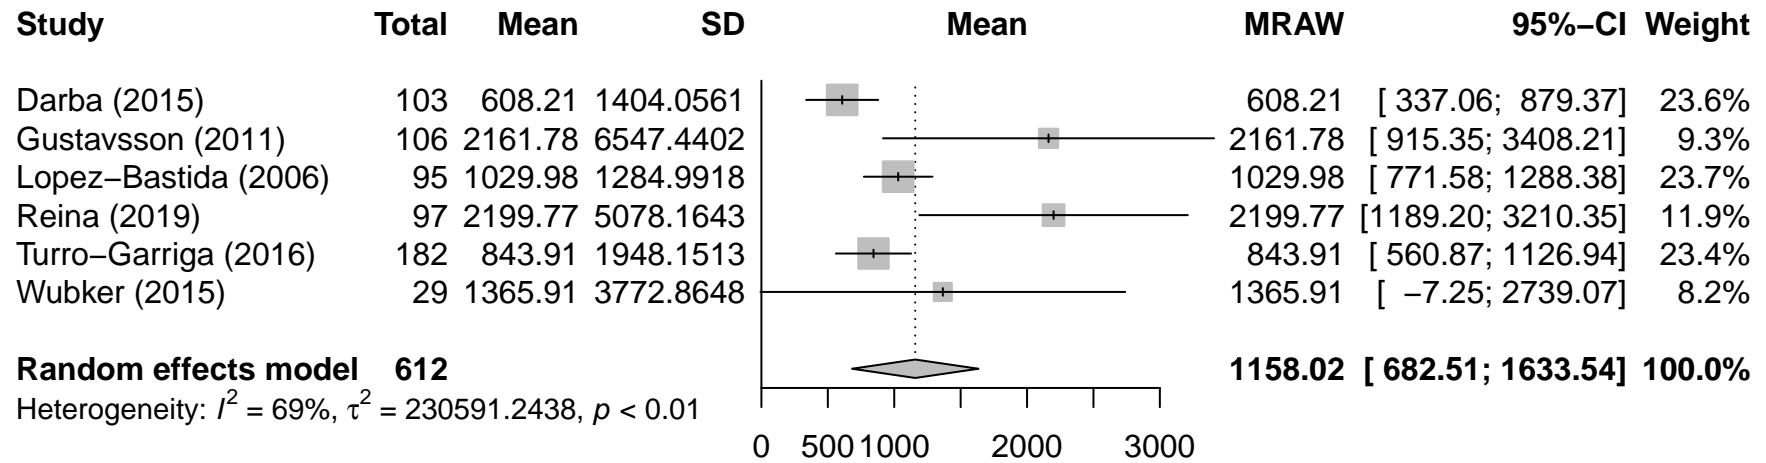

Southern Europe, All, Severe, Pharmaceuticals

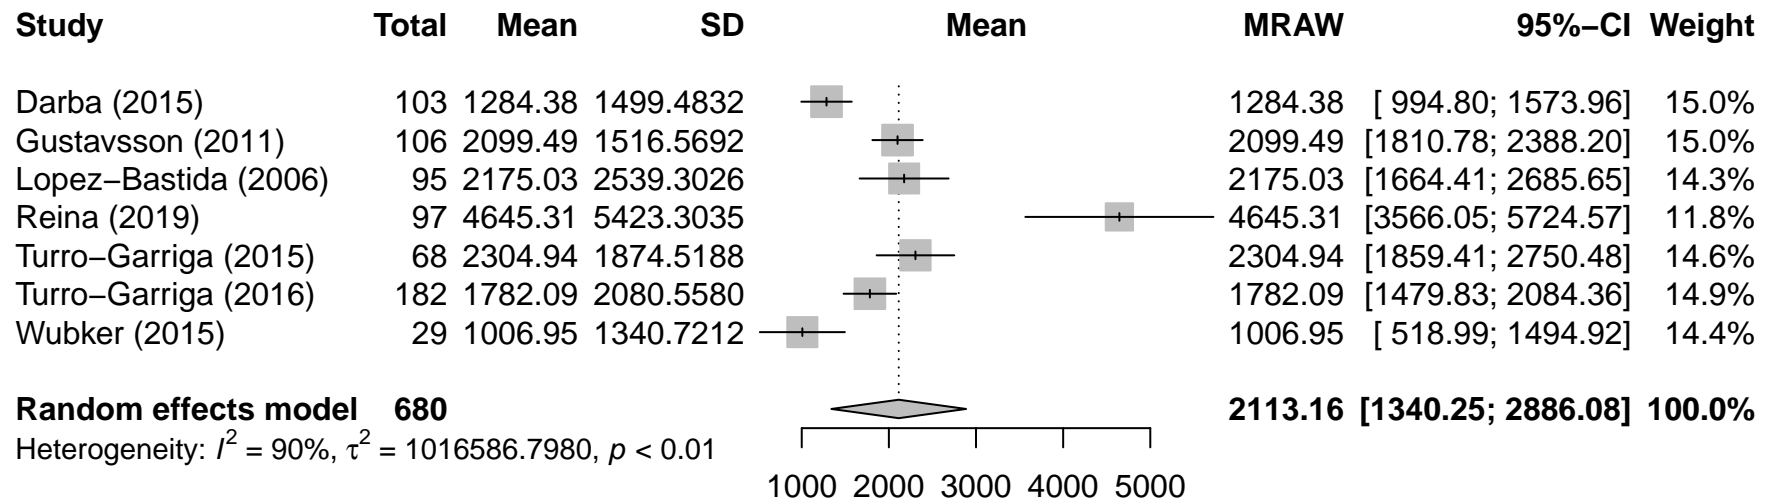

Southern Europe, All, Severe, Institutional care

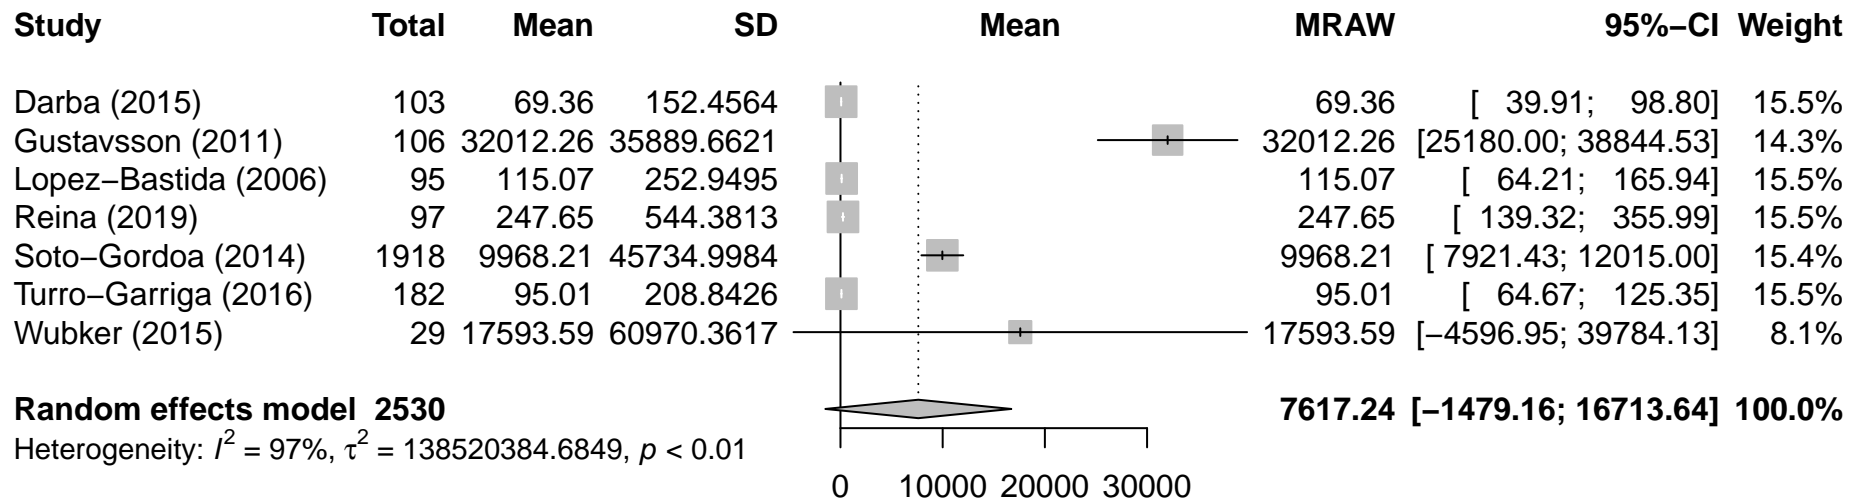

Southern Europe, All, Severe, Community care

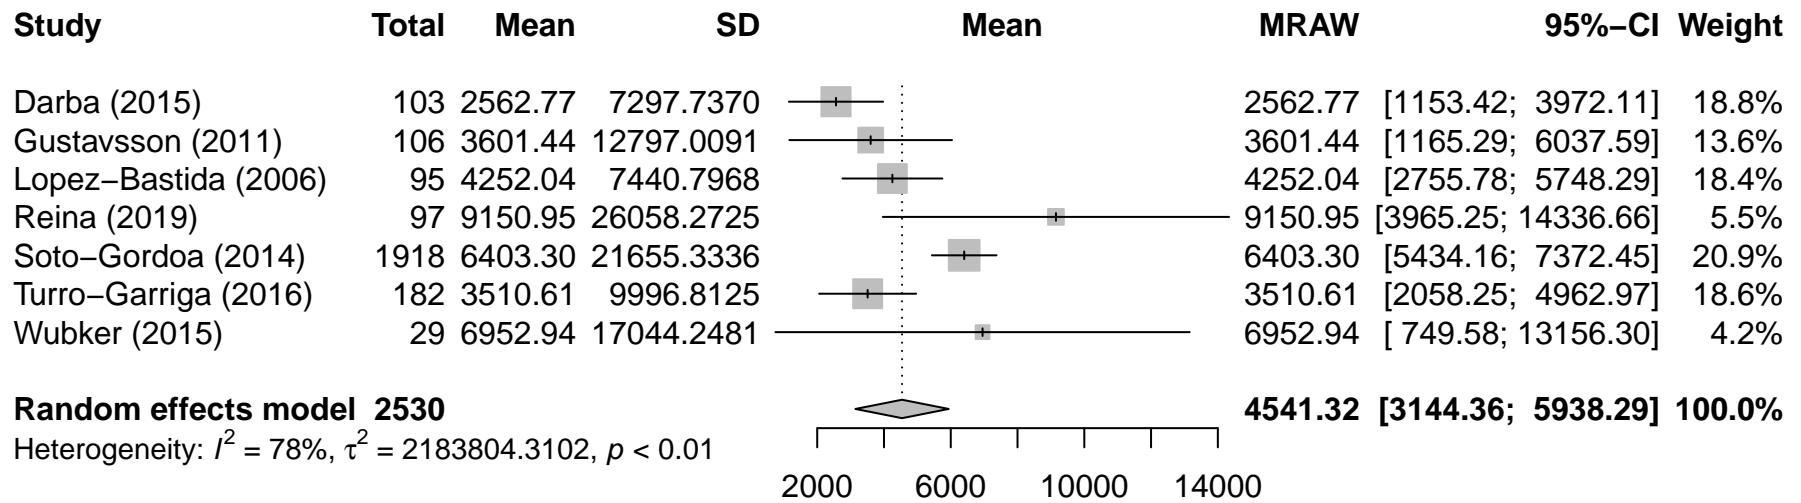

Southern Europe, All, Severe, Caregiver work loss

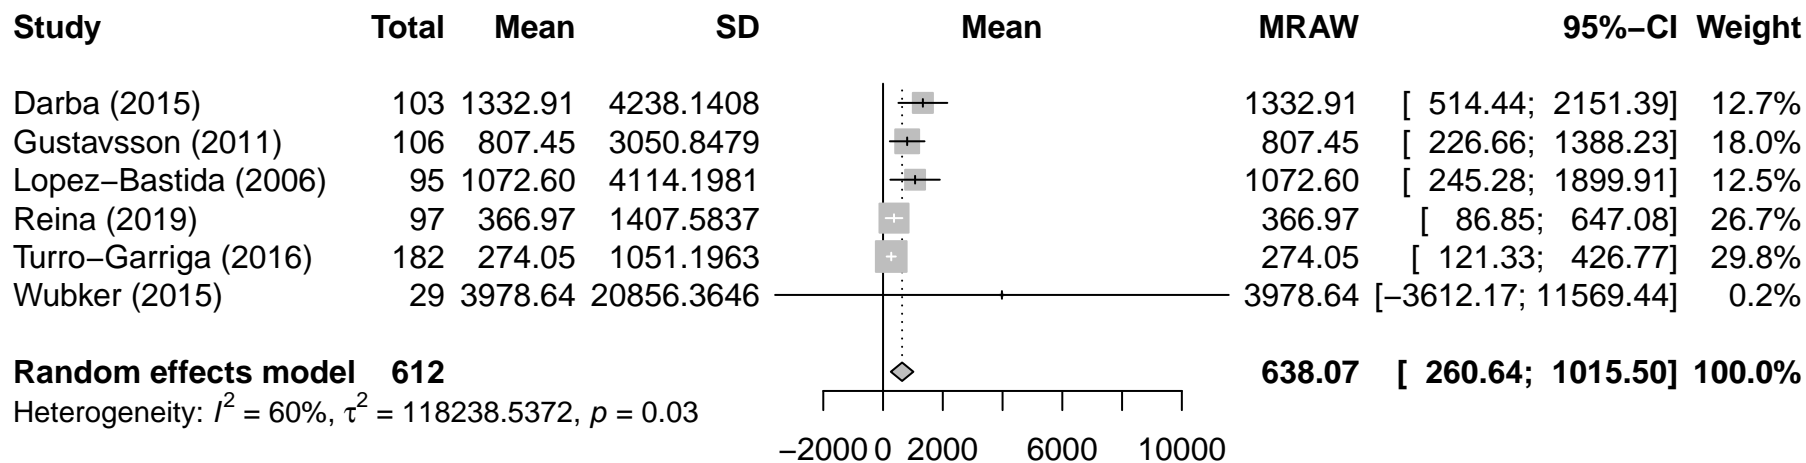



Southern Europe, All, Severe, Caregiver time

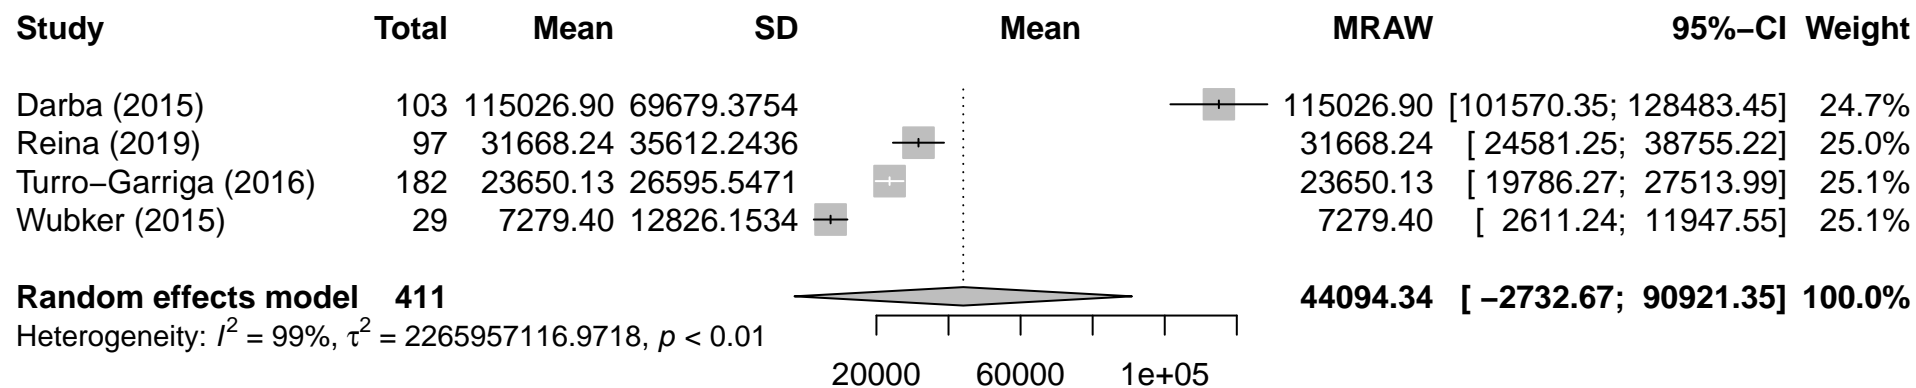

Southern Europe, All, All, Inpatient care

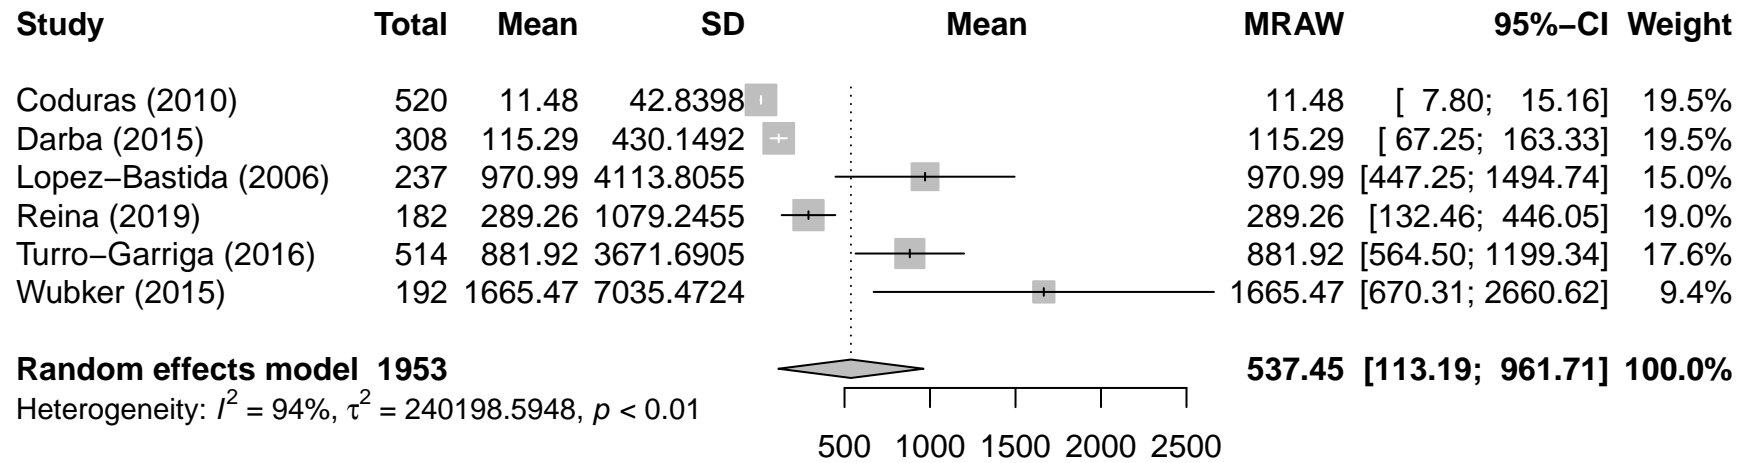

Southern Europe, All, All, Outpatient care

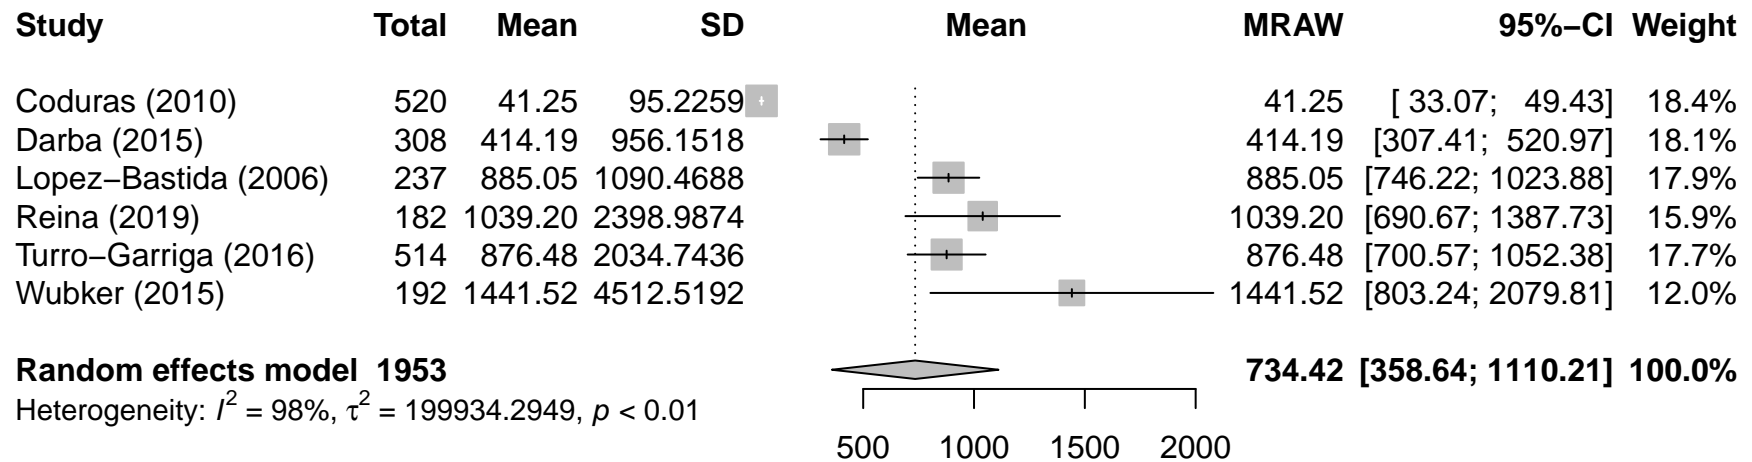

Southern Europe, All, All, Pharmaceuticals

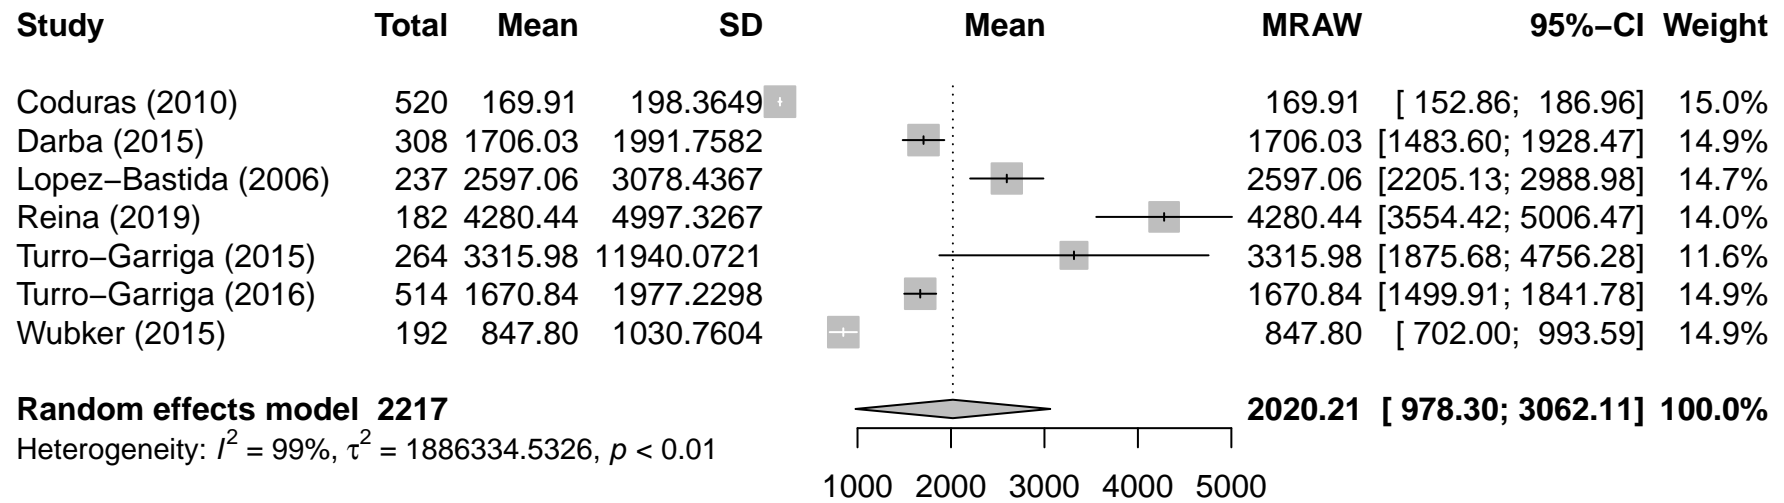

Southern Europe, All, All, Institutional care

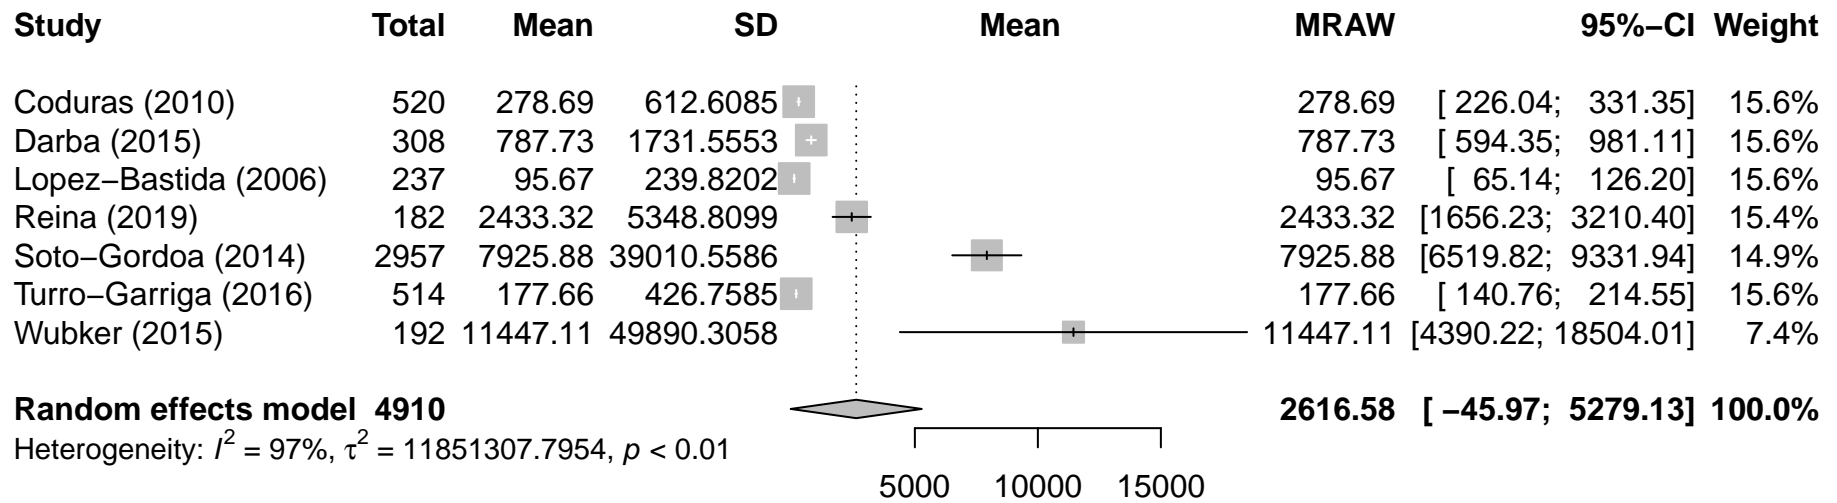

Southern Europe, All, All, Community care

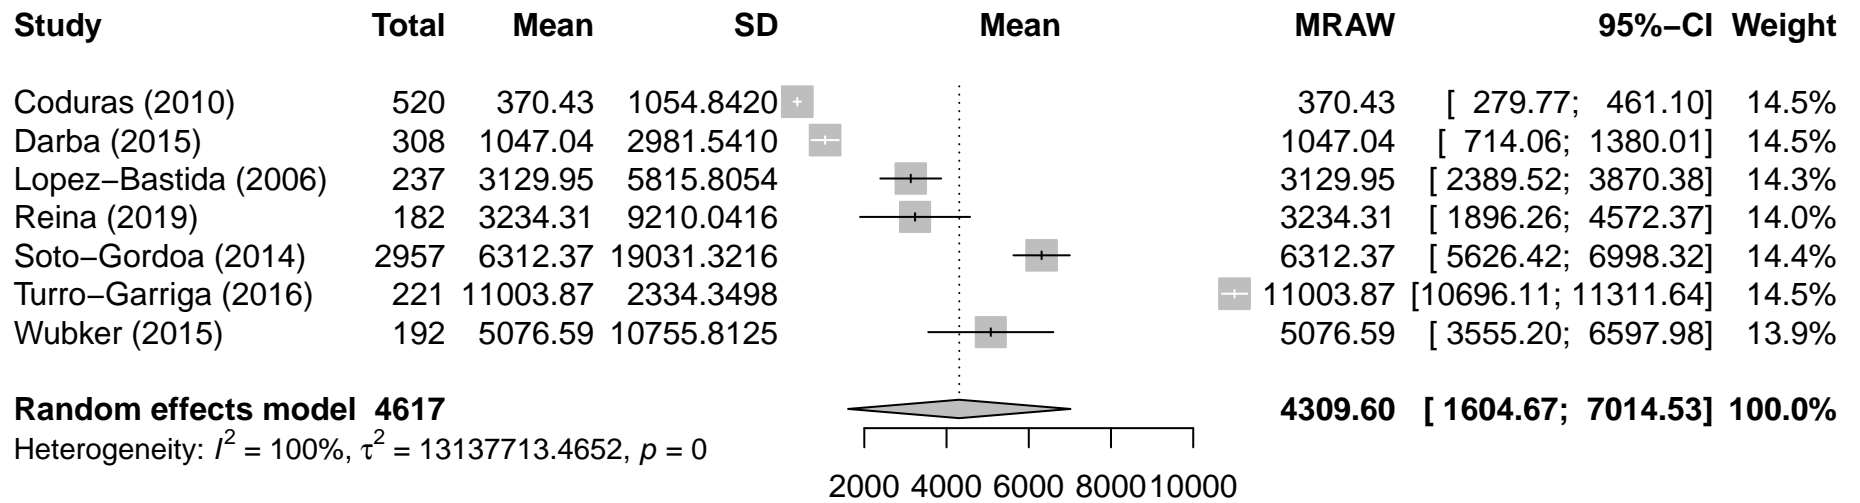

Southern Europe, All, All, Caregiver work loss

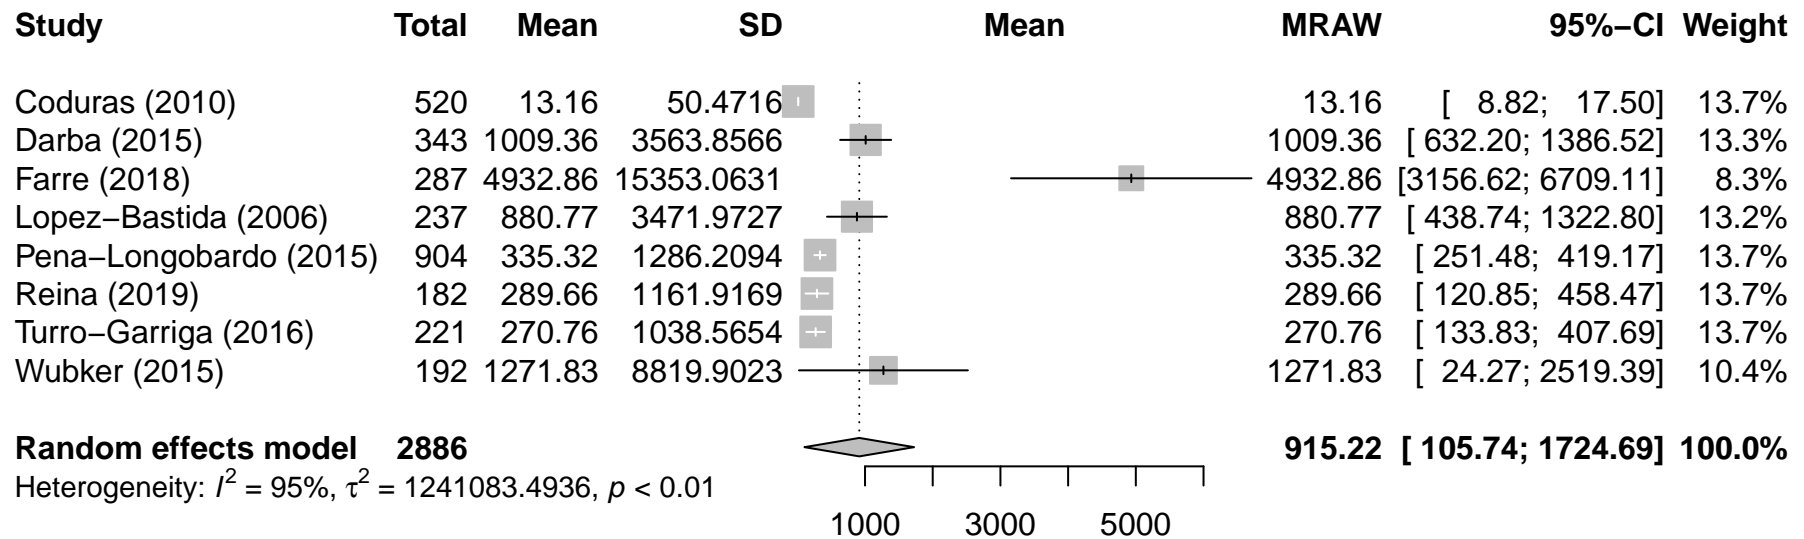

Southern Europe, All, All, Caregiver time

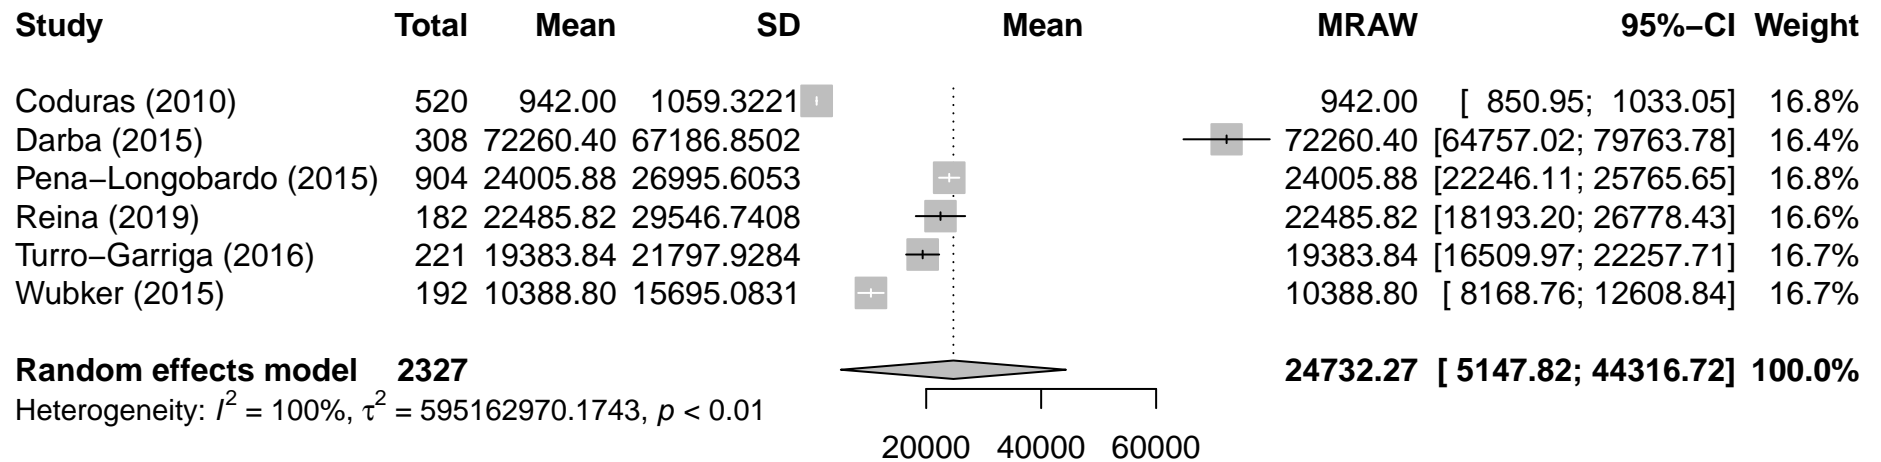



British Isles, Community, Mild, Inpatient care

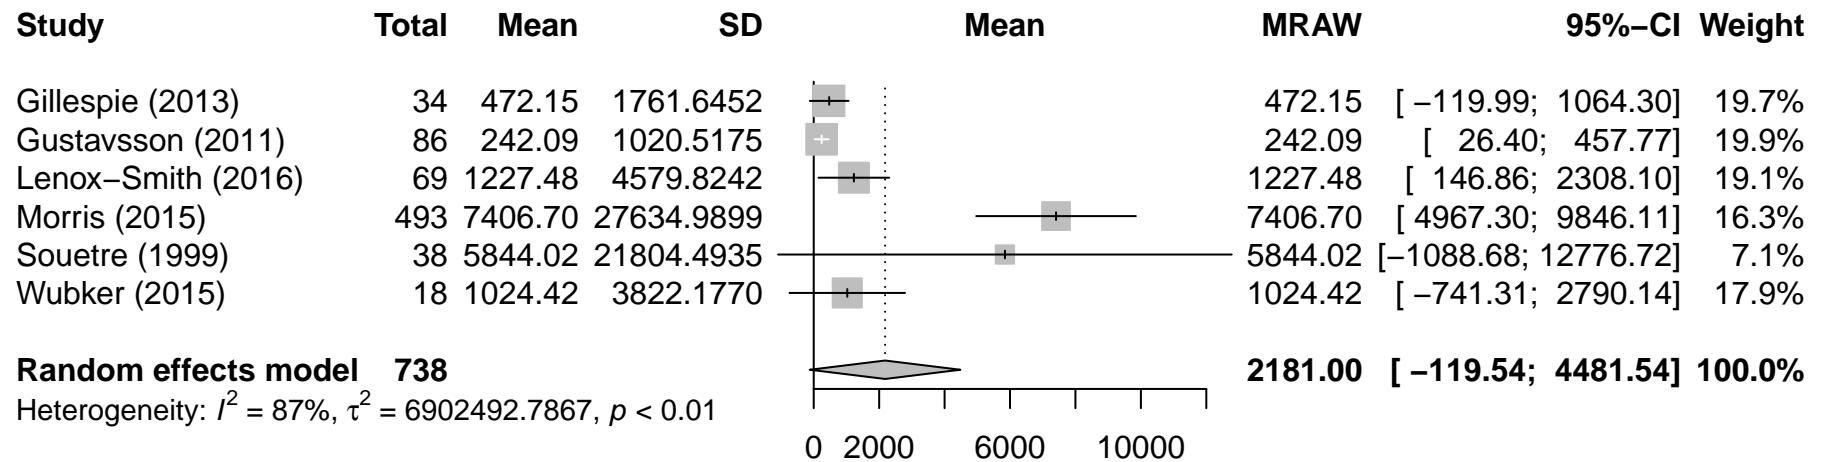

British Isles, Community, Mild, Outpatient care

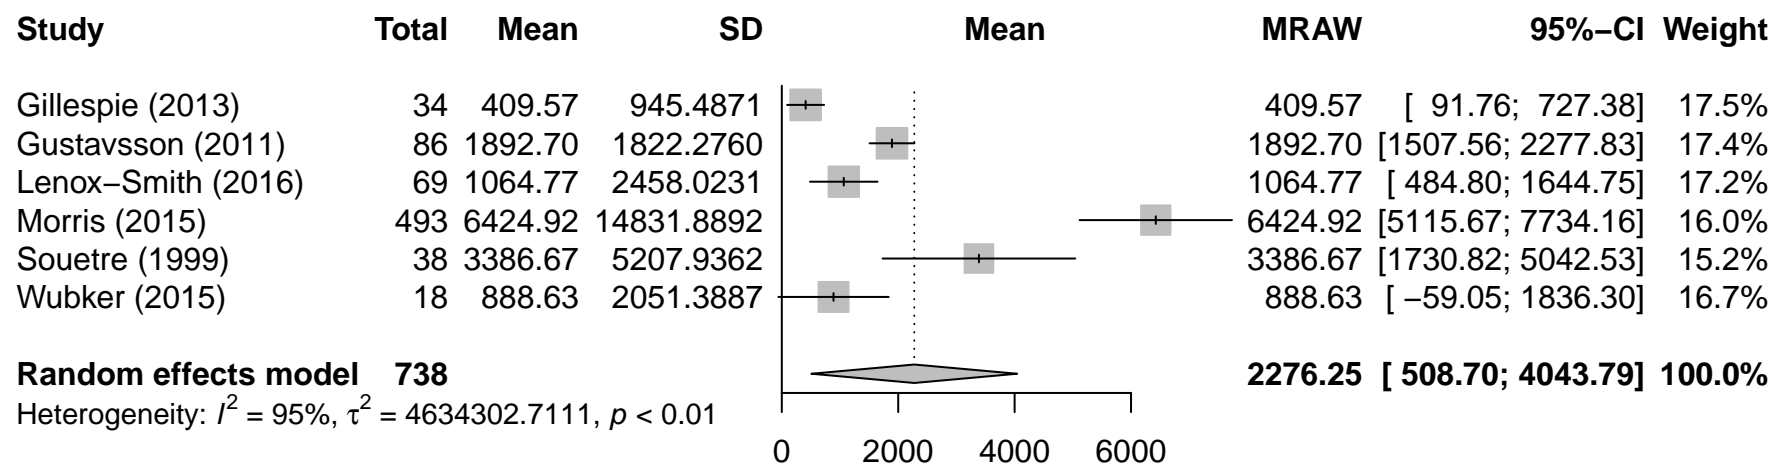

British Isles, Community, Mild, Pharmaceuticals

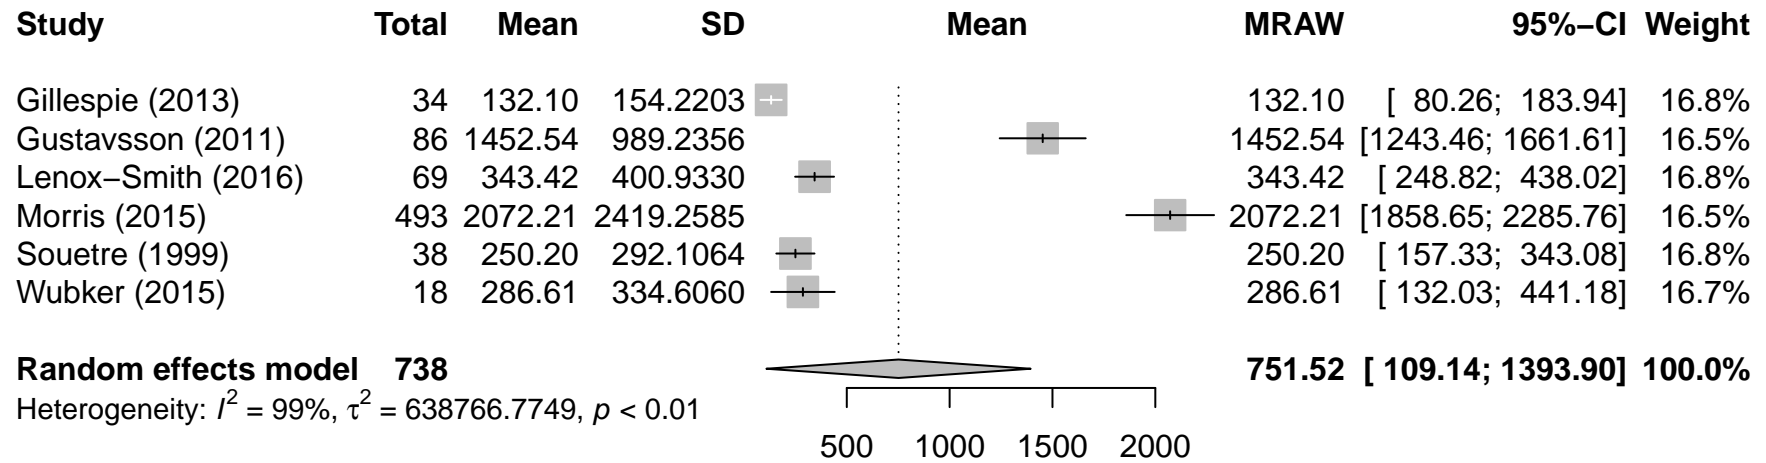

British Isles, Community, Mild, Institutional care

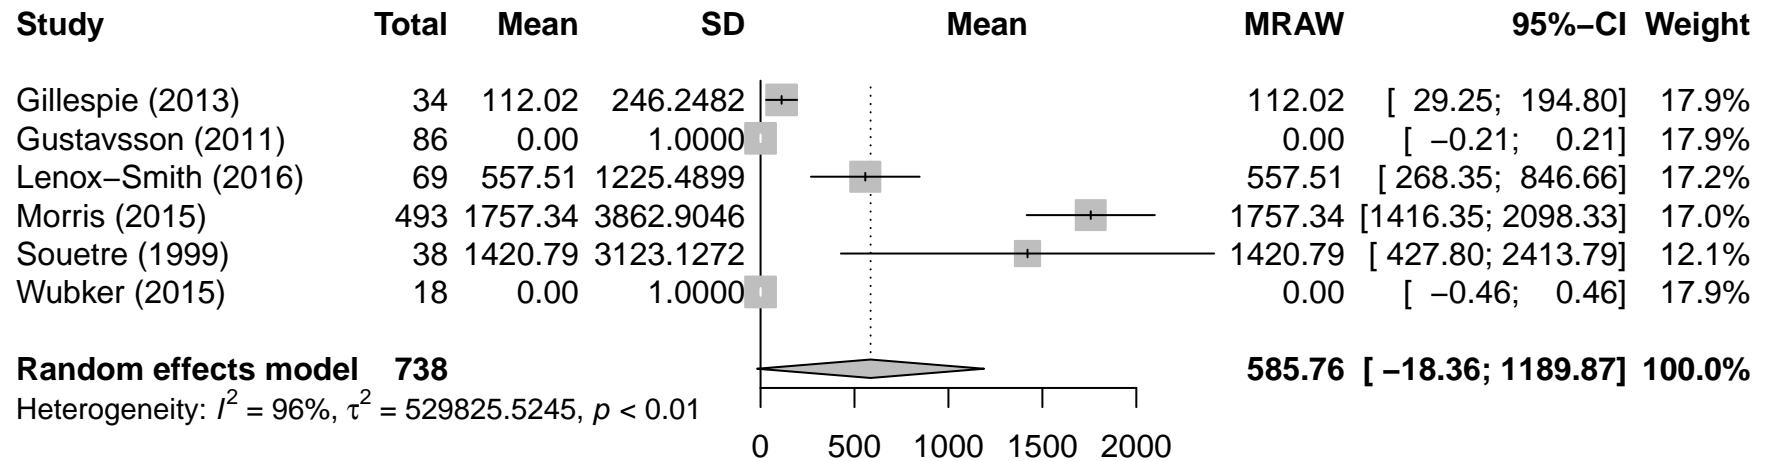

British Isles, Community, Mild, Community care

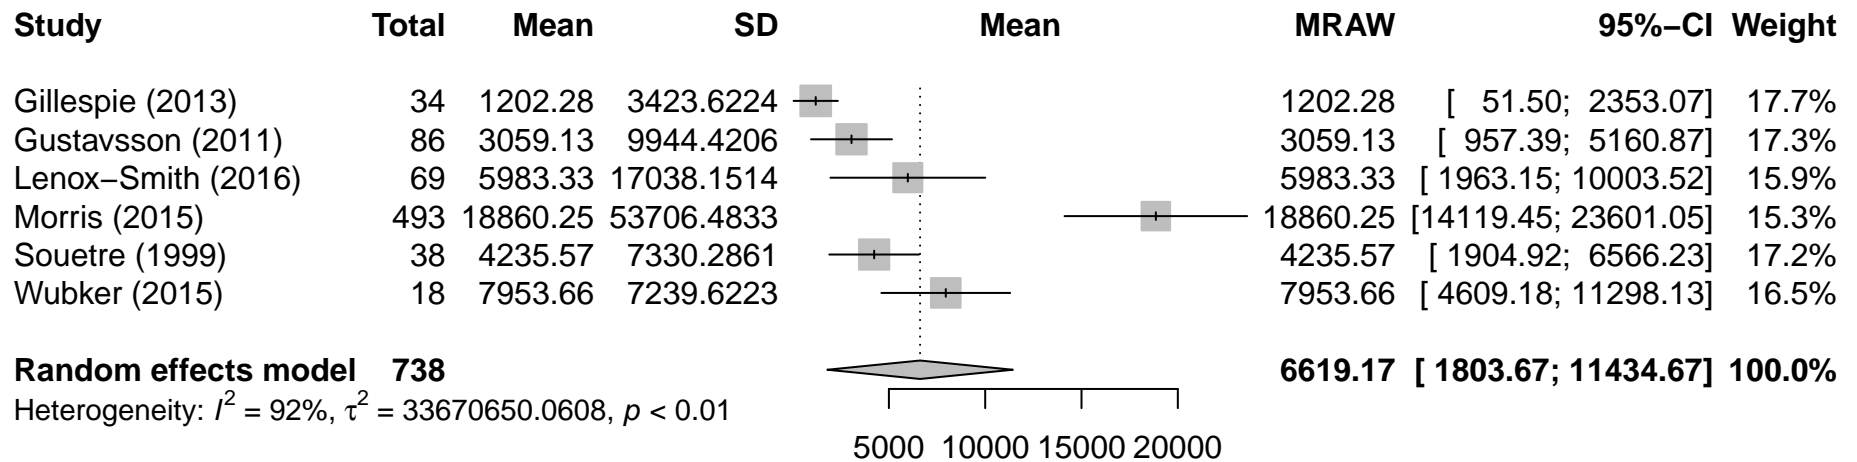

British Isles, Community, Mild, Caregiver work loss

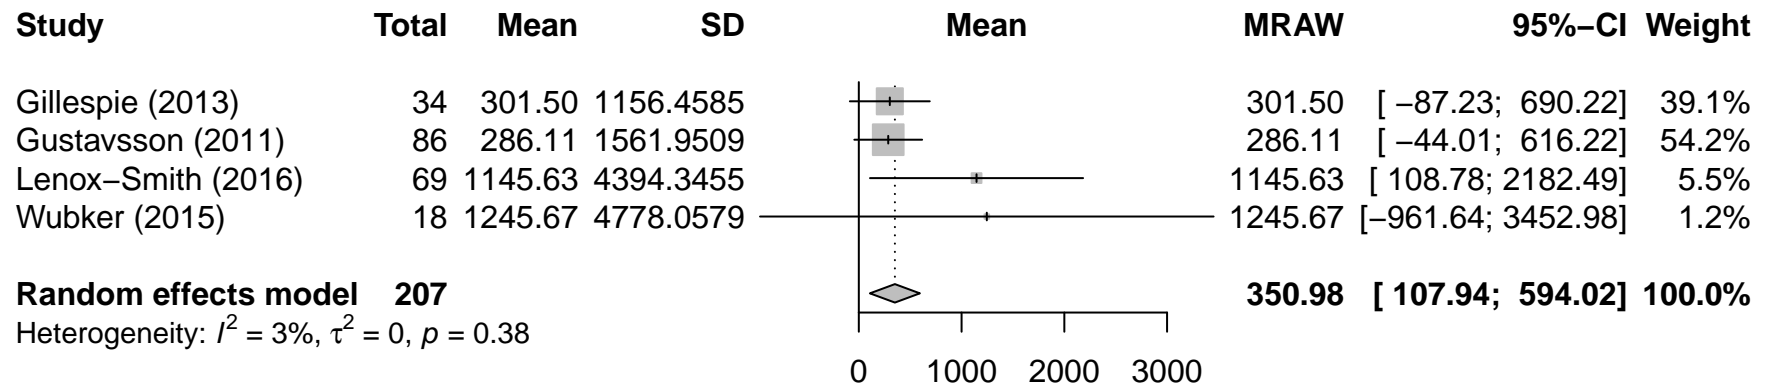

British Isles, Community, Mild, Caregiver time

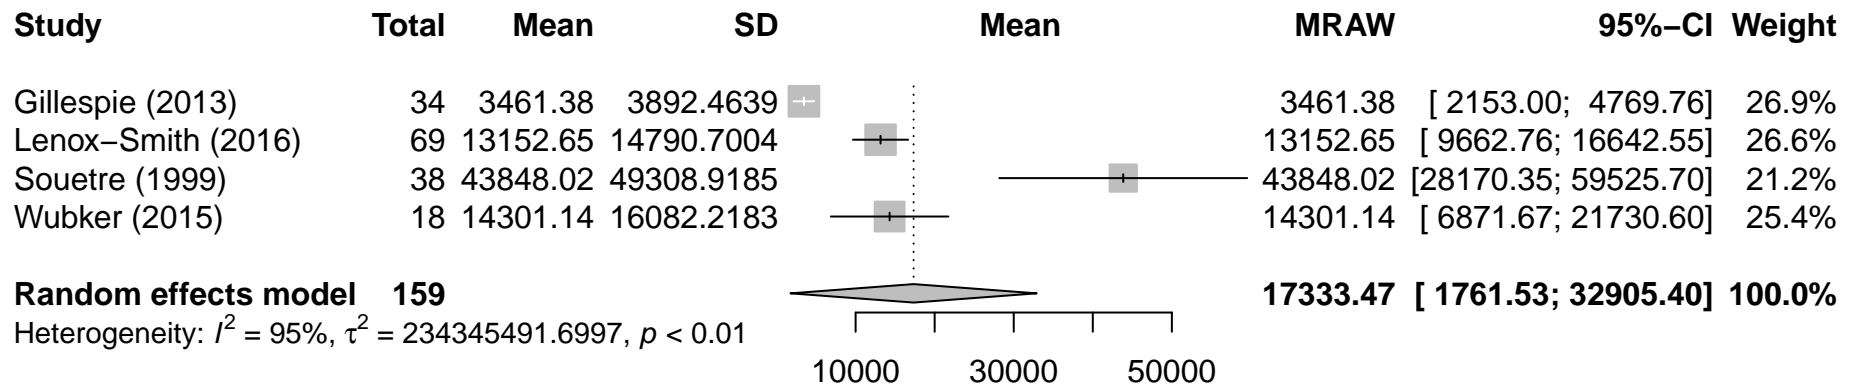

British Isles, Community, Moderate, Inpatient care

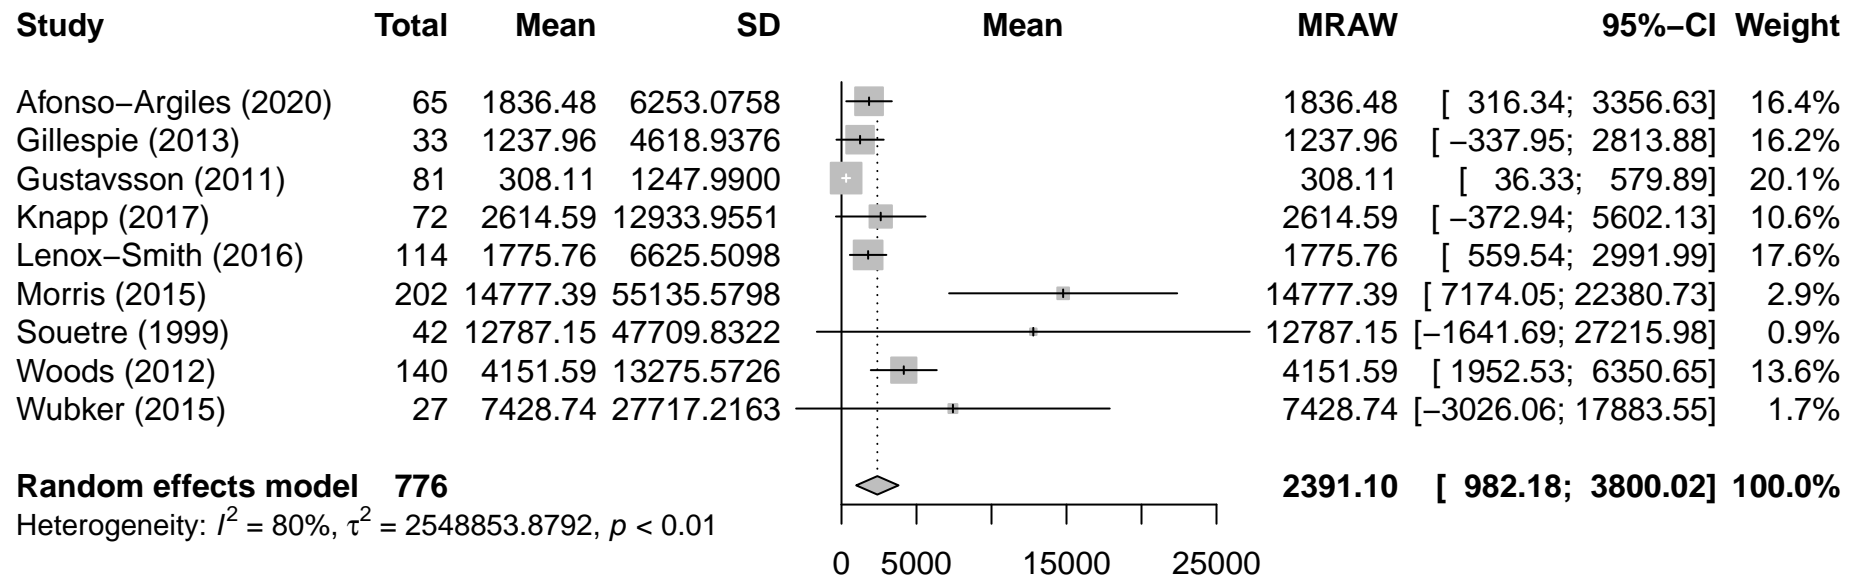



British Isles, Community, Moderate, Outpatient care

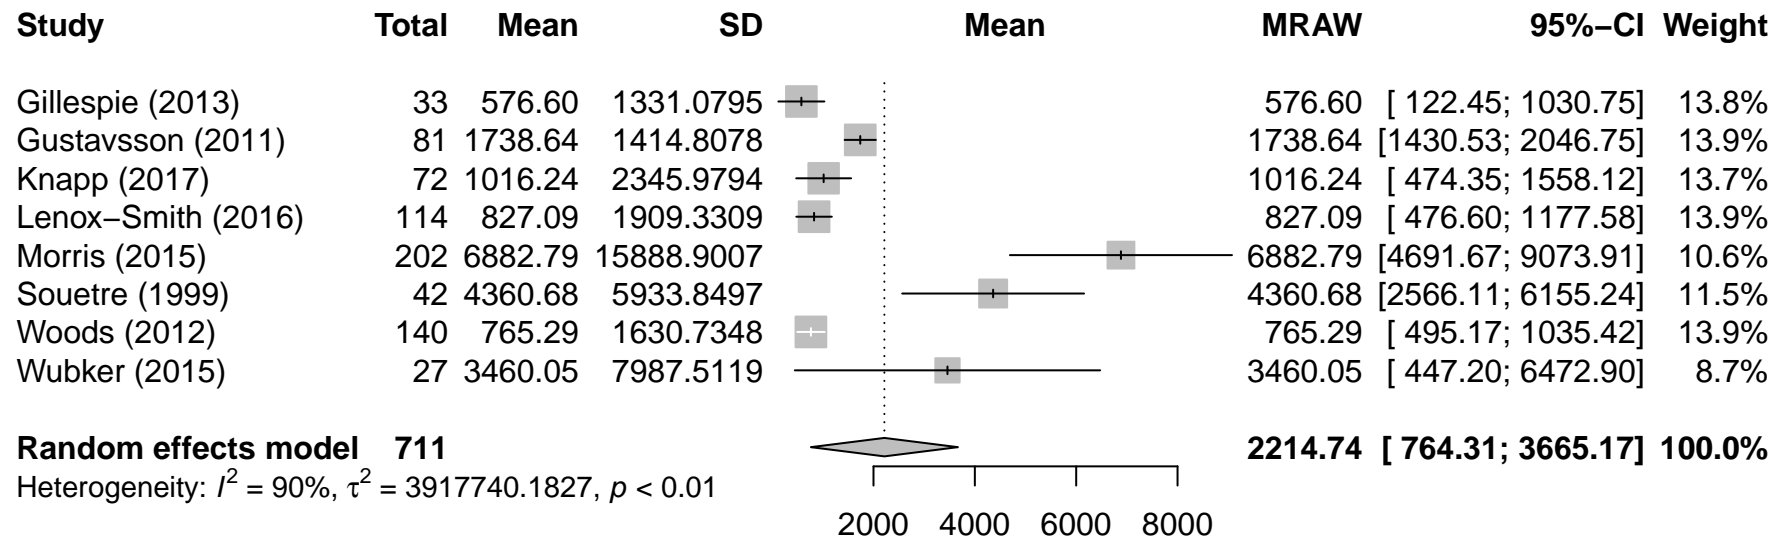

British Isles, Community, Moderate, Pharmaceuticals

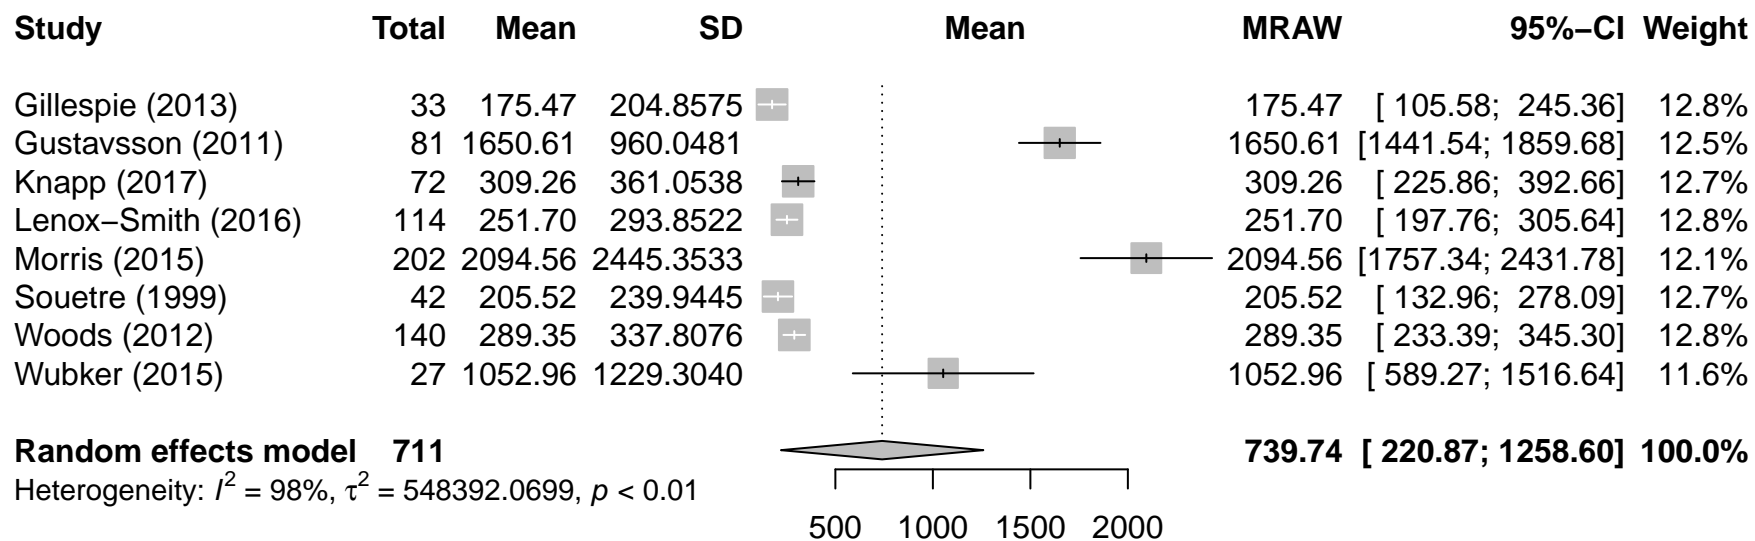

British Isles, Community, Moderate, Institutional care

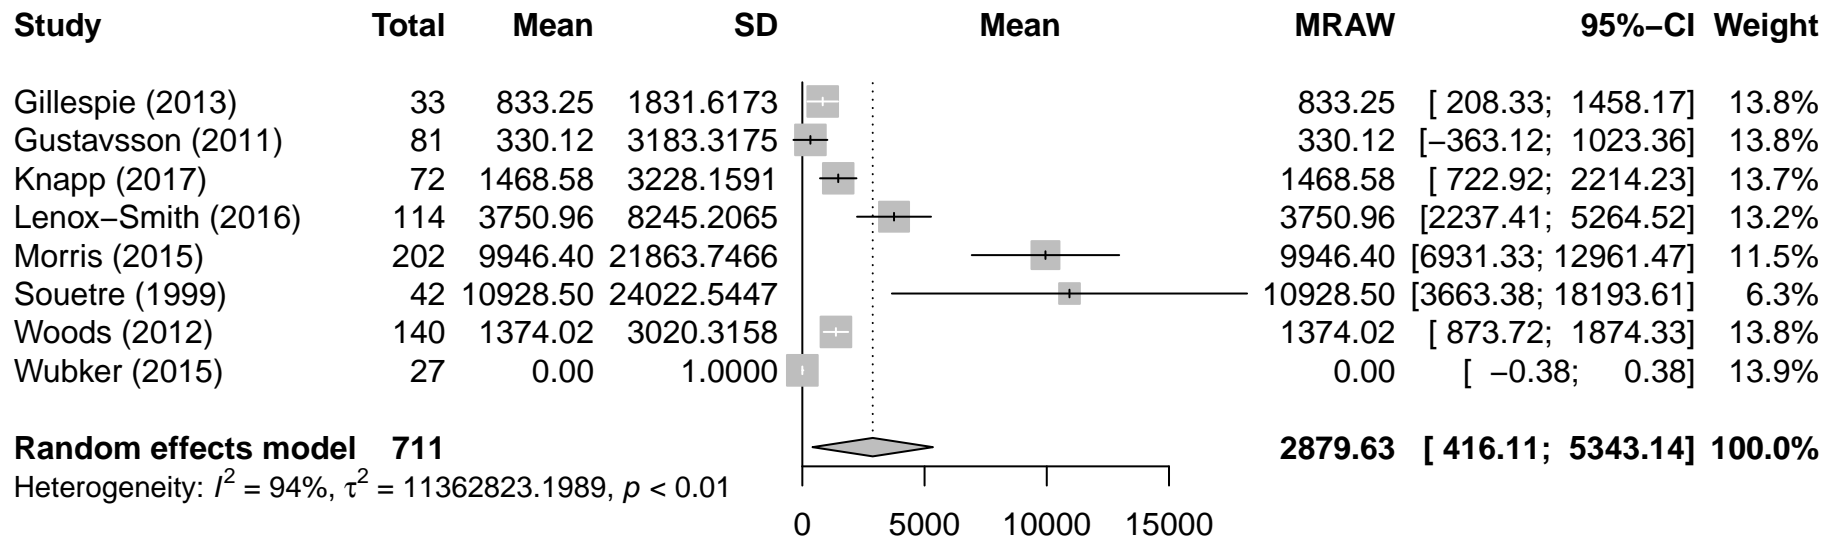

British Isles, Community, Moderate, Community care

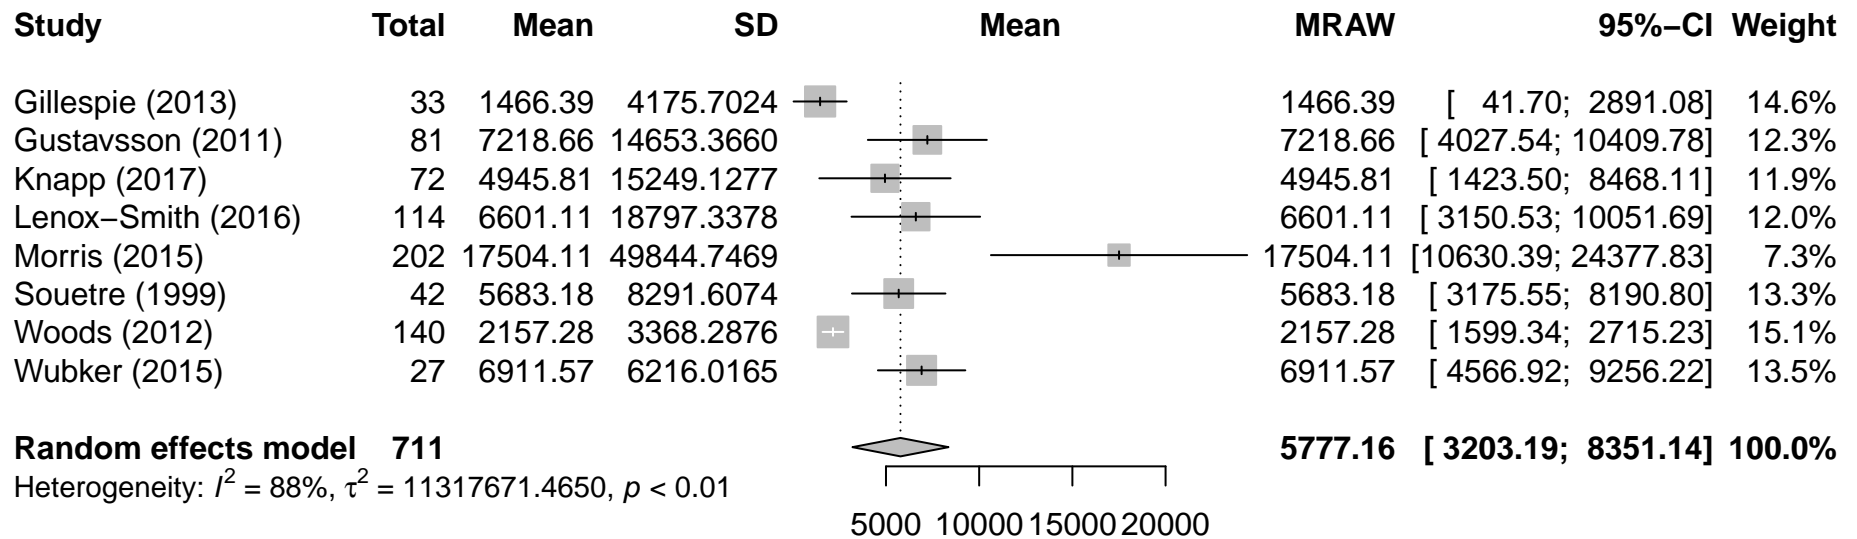

British Isles, Community, Moderate, Caregiver work loss

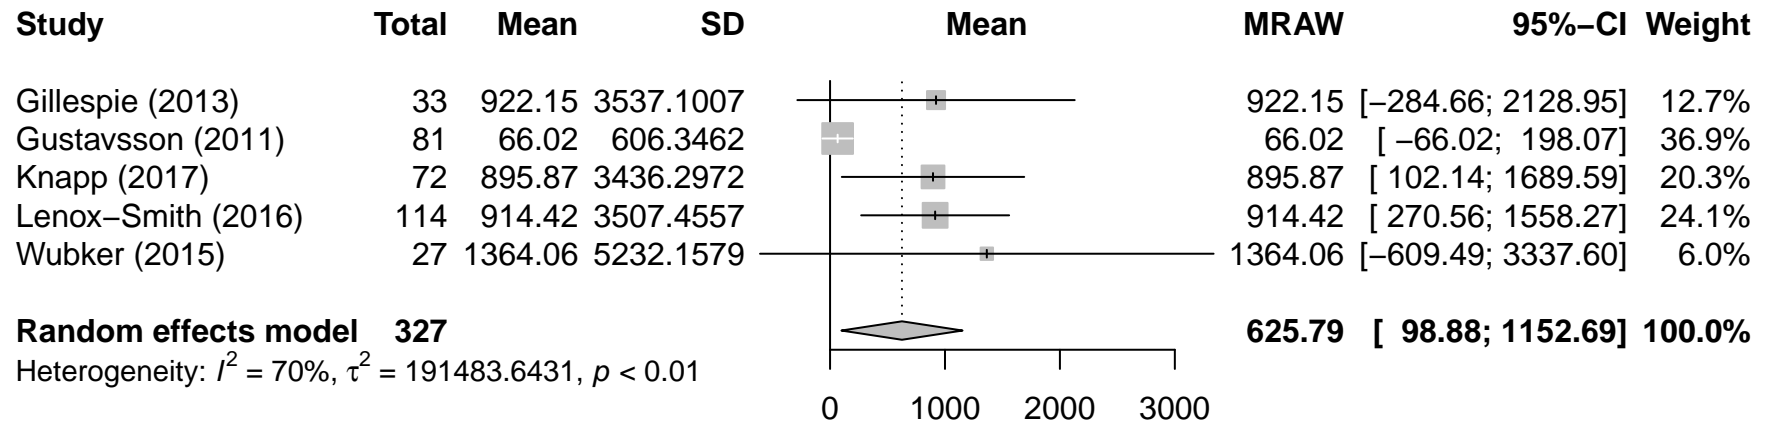

British Isles, Community, Moderate, Caregiver time

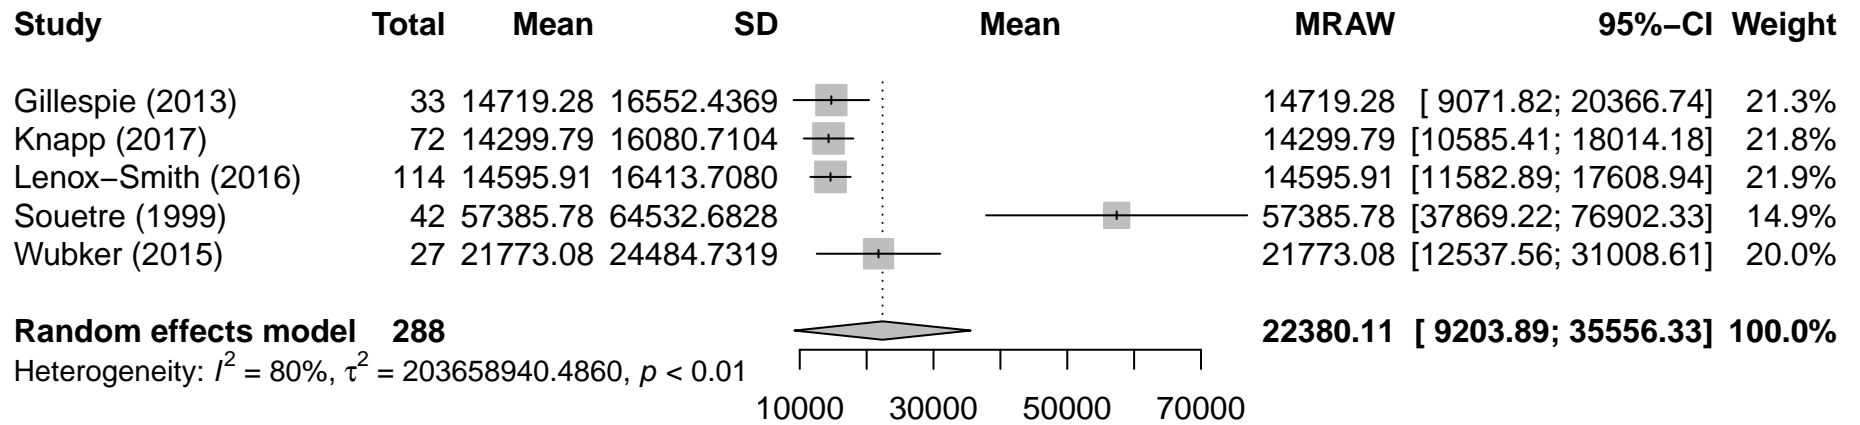

British Isles, Community, Severe, Inpatient care

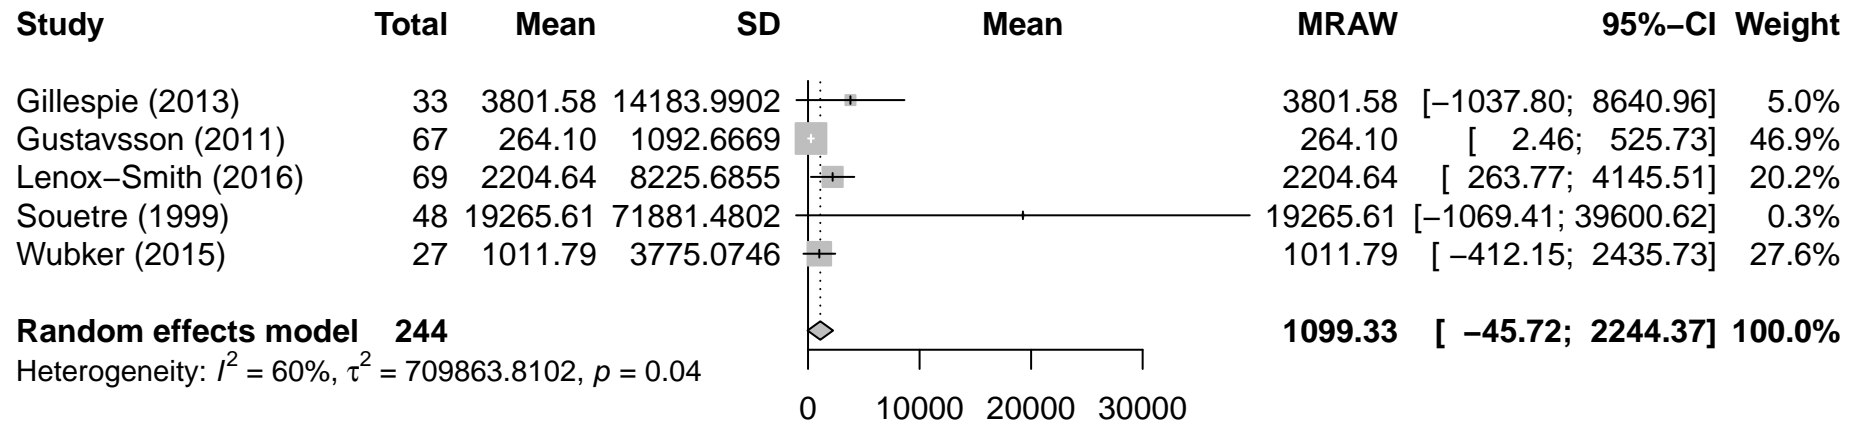

British Isles, Community, Severe, Outpatient care

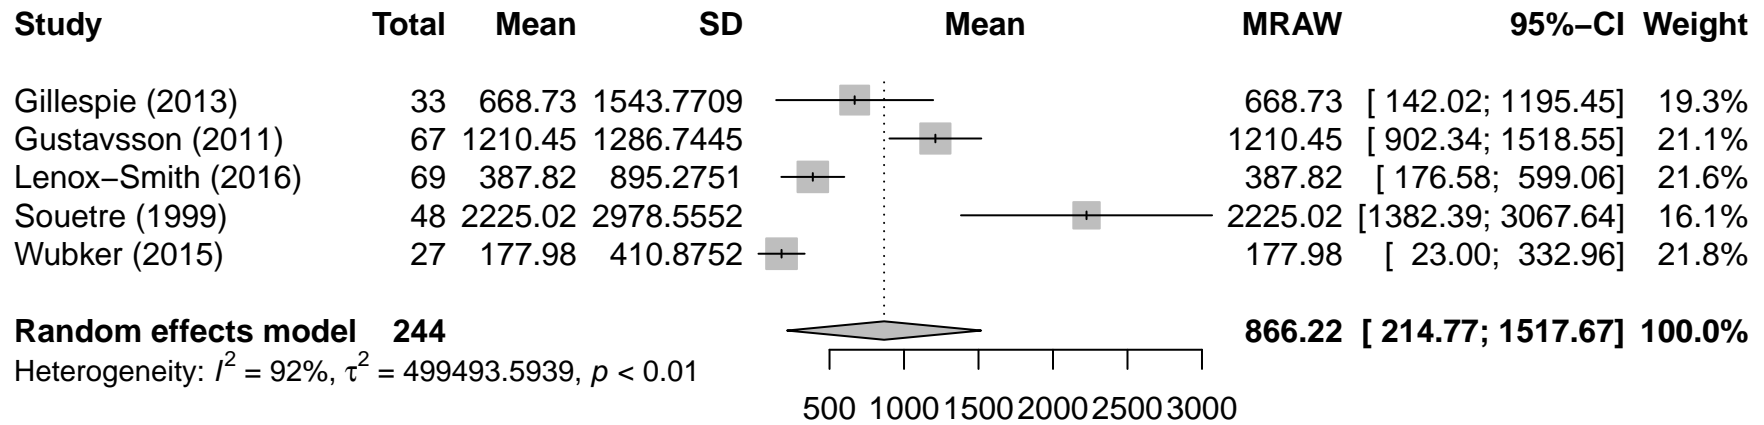



British Isles, Community, Severe, Pharmaceuticals

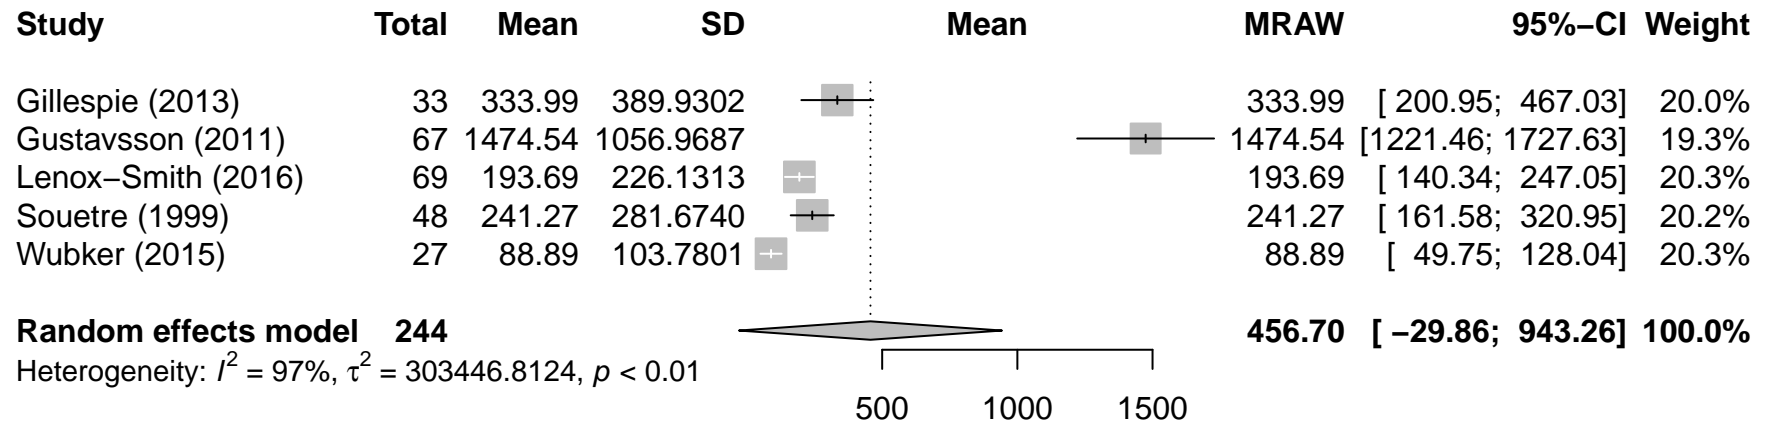

British Isles, Community, Severe, Institutional care

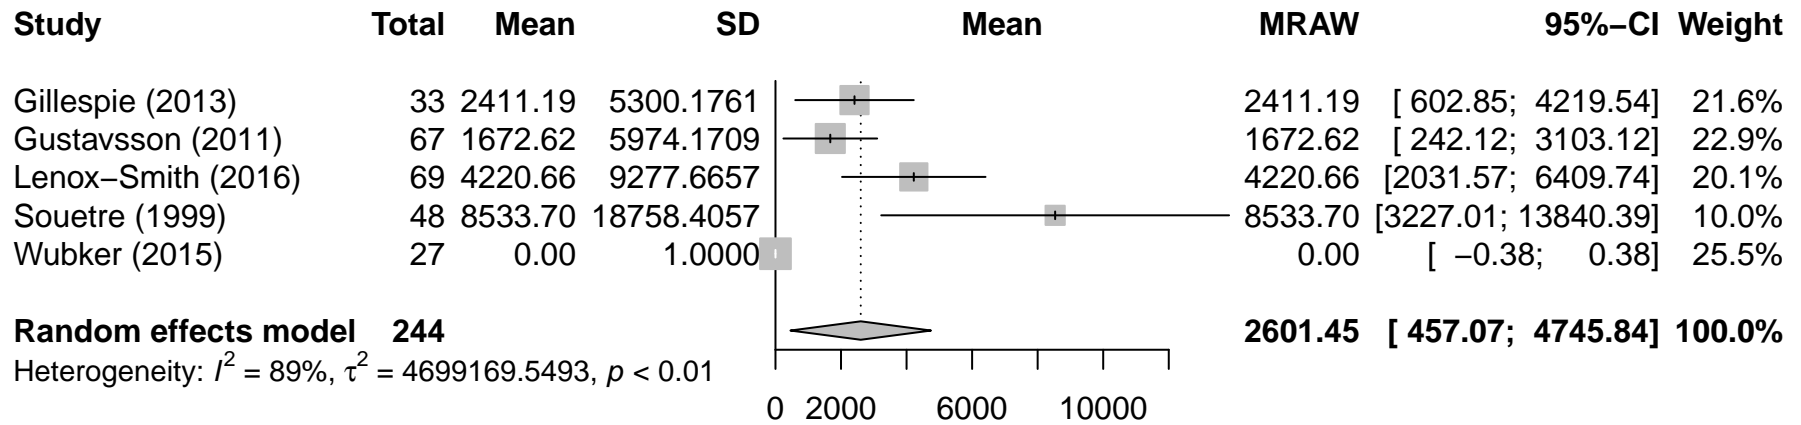

British Isles, Community, Severe, Community care

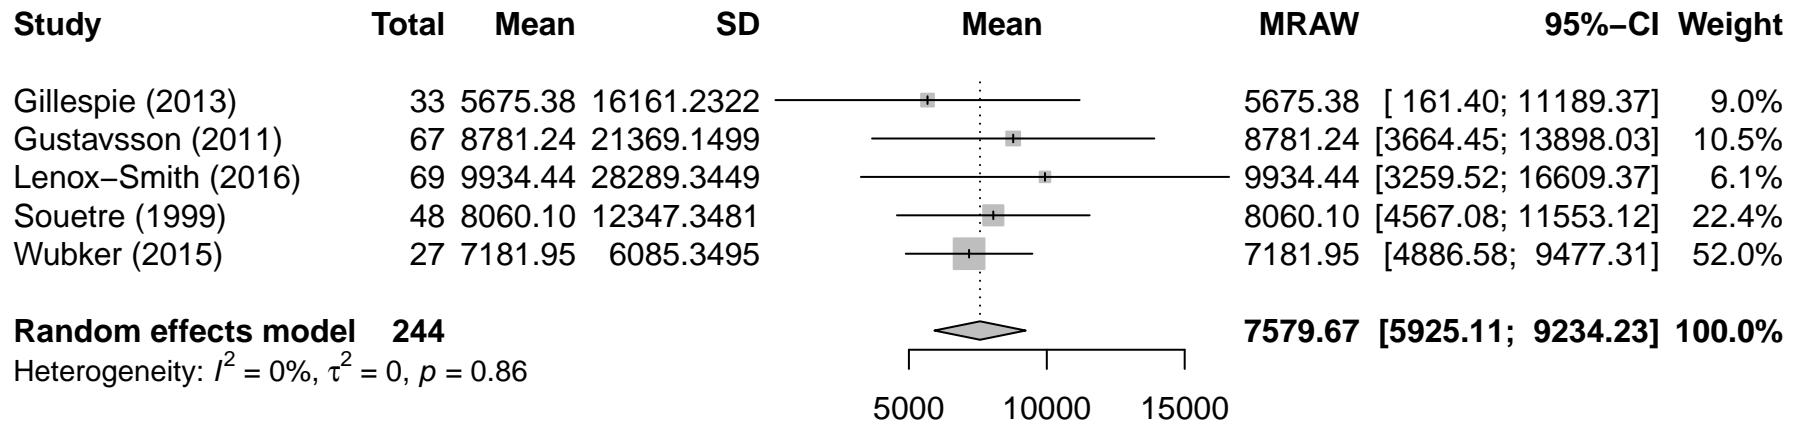

British Isles, Community, Severe, Caregiver work loss

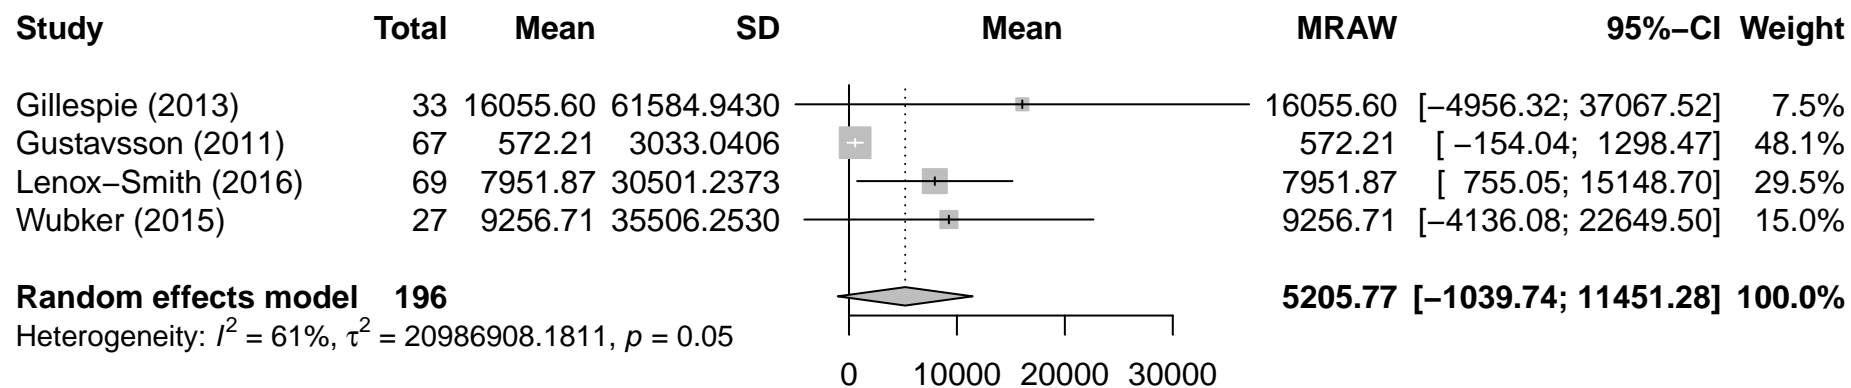

British Isles, Community, Severe, Caregiver time

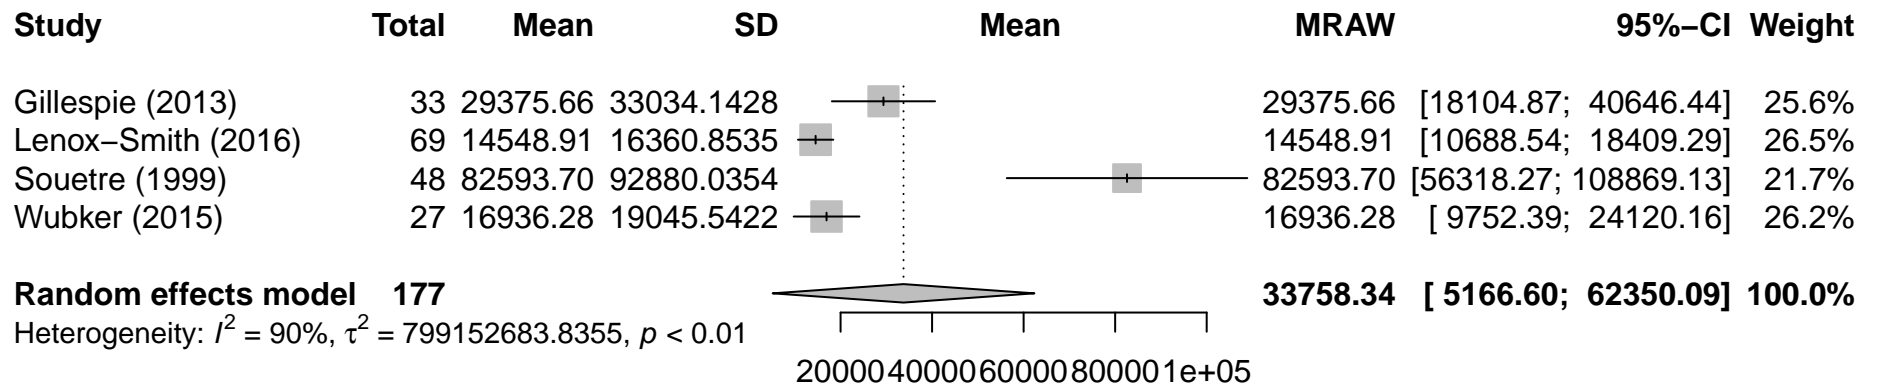

British Isles, Community, All, Inpatient care

| Study                       | Total       | Mean     | SD         | Mean | MRAW           | 95%-CI                    | Weight        |
|-----------------------------|-------------|----------|------------|------|----------------|---------------------------|---------------|
| Banerjee (2013)             | 84          | 816.45   | 3046.2304  |      | 816.45         | [ 165.01; 1467.88]        | 7.0%          |
| Dodel (2015)                | 526         | 281.65   | 2487.4615  |      | 281.65         | [ 69.07; 494.22]          | 7.1%          |
| Ferry (2018)                | 30          | 3404.90  | 11613.2302 |      | 3404.90        | [-750.76; 7560.57]        | 3.8%          |
| Gillespie (2013)            | 100         | 1956.70  | 5524.9144  |      | 1956.70        | [ 873.83; 3039.56]        | 6.7%          |
| Gustavsson (2010)           | 229         | 834.23   | 8439.4822  |      | 834.23         | [-258.83; 1927.30]        | 6.7%          |
| Gustavsson (2011)           | 234         | 271.25   | 1124.5139  |      | 271.25         | [ 127.16; 415.33]         | 7.1%          |
| Handels (2018)              | 43          | 9246.11  | 15048.6652 |      | 9246.11        | [4748.19; 13744.03]       | 3.5%          |
| Handels (2018)              | 76          | 110.43   | 199.8480   |      | 110.43         | [ 65.50; 155.36]          | 7.1%          |
| Howard (2021)               | 223         | 5998.20  | 17709.7978 |      | 5998.20        | [3673.81; 8322.59]        | 5.6%          |
| Lenox-Smith (2016)          | 252         | 1743.07  | 6652.7825  |      | 1743.07        | [ 921.68; 2564.46]        | 6.9%          |
| Livingston (2014)           | 67          | 4900.60  | 8584.0896  |      | 4900.60        | [2845.16; 6956.04]        | 5.9%          |
| Longo (2019)                | 323         | 6056.18  | 16935.1629 |      | 6056.18        | [4209.31; 7903.05]        | 6.1%          |
| Mueller (2018)              | 776         | 3140.28  | 63.6815    |      | 3140.28        | [3135.80; 3144.76]        | 7.1%          |
| Mueller (2018)              | 194         | 3707.40  | 77.3276    |      | 3707.40        | [3696.52; 3718.28]        | 7.1%          |
| Souetre (1999)              | 128         | 13155.33 | 53437.3690 |      | 13155.33       | [3897.95; 22412.71]       | 1.3%          |
| Walsh (2019)                | 253         | 97.22    | 351.2113   |      | 97.22          | [ 53.95; 140.50]          | 7.1%          |
| Wubker (2015)               | 72          | 3421.30  | 17513.5304 |      | 3421.30        | [-624.04; 7466.65]        | 3.9%          |
| <b>Random effects model</b> | <b>3610</b> |          |            |      | <b>2650.59</b> | <b>[1477.08; 3824.10]</b> | <b>100.0%</b> |

Heterogeneity:  $I^2 = 100\%$ ,  $\tau^2 = 5025442.5894$ ,  $p = 0$

0 5000 10000 15000 20000

British Isles, Community, All, Outpatient care

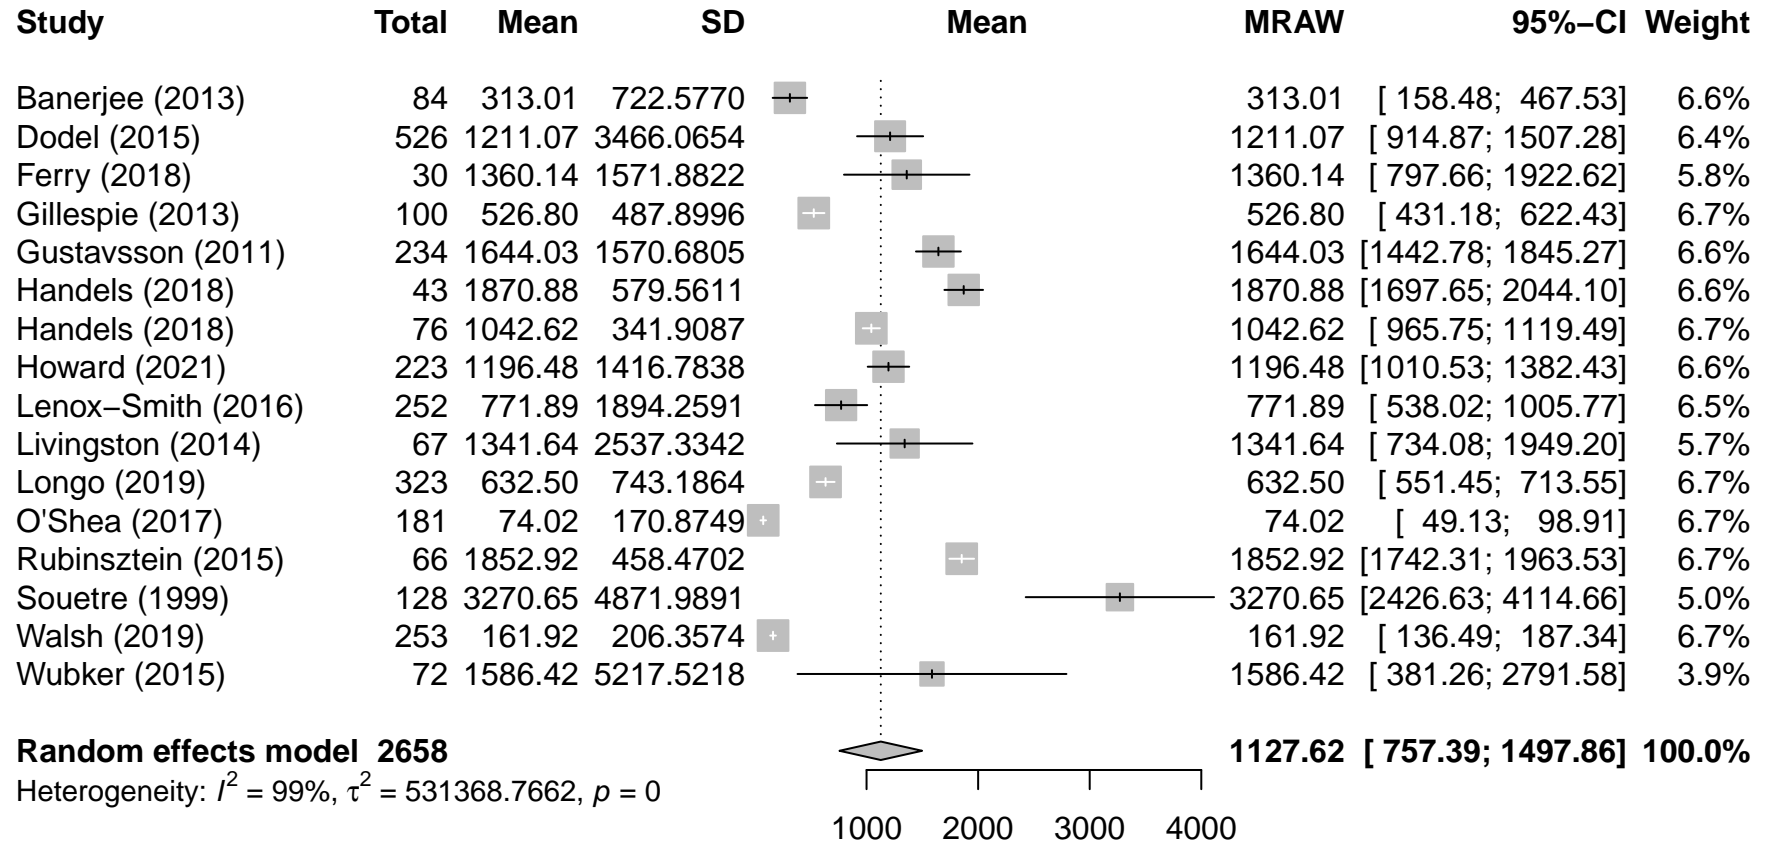

British Isles, Community, All, Pharmaceuticals

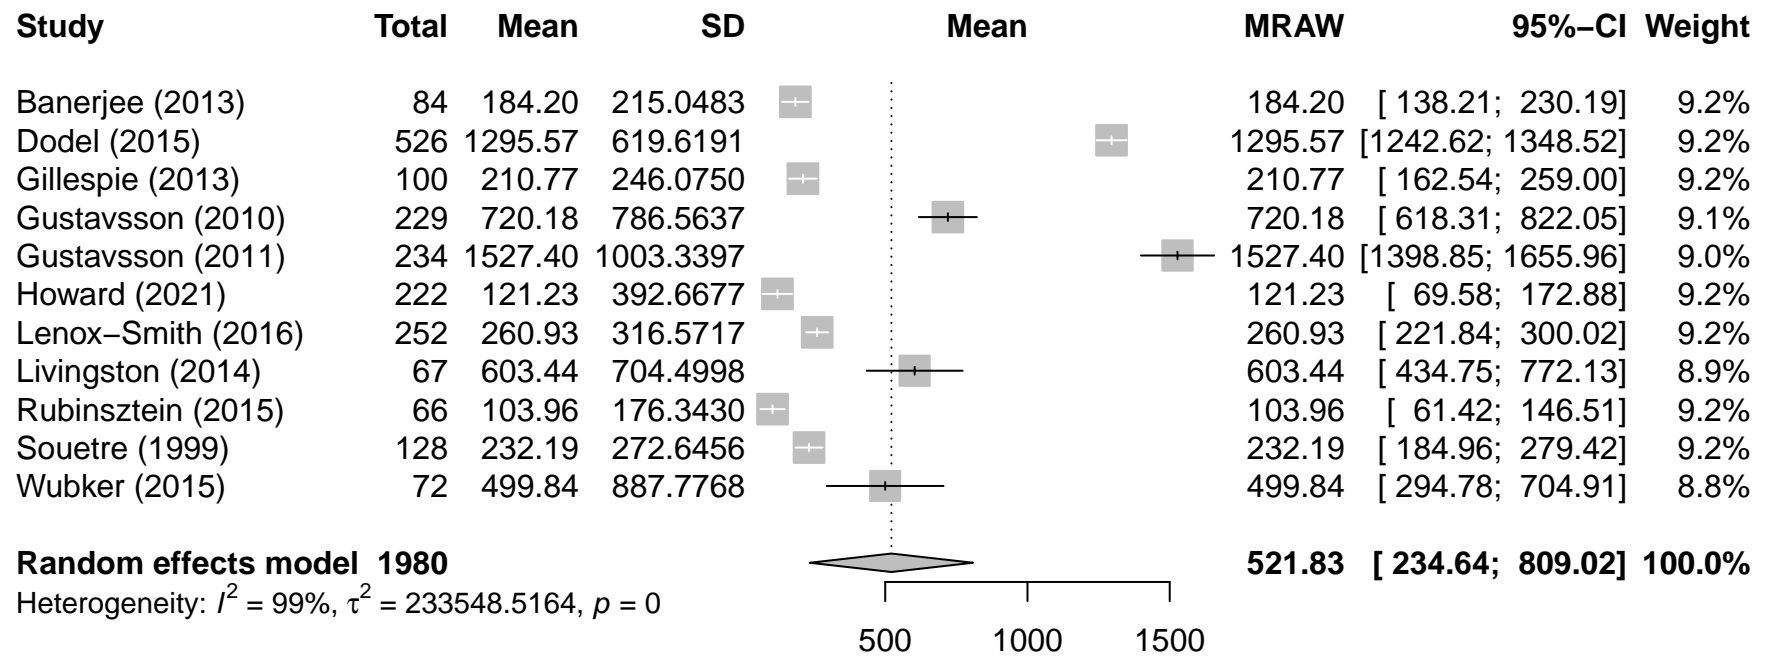



British Isles, Community, All, Institutional care

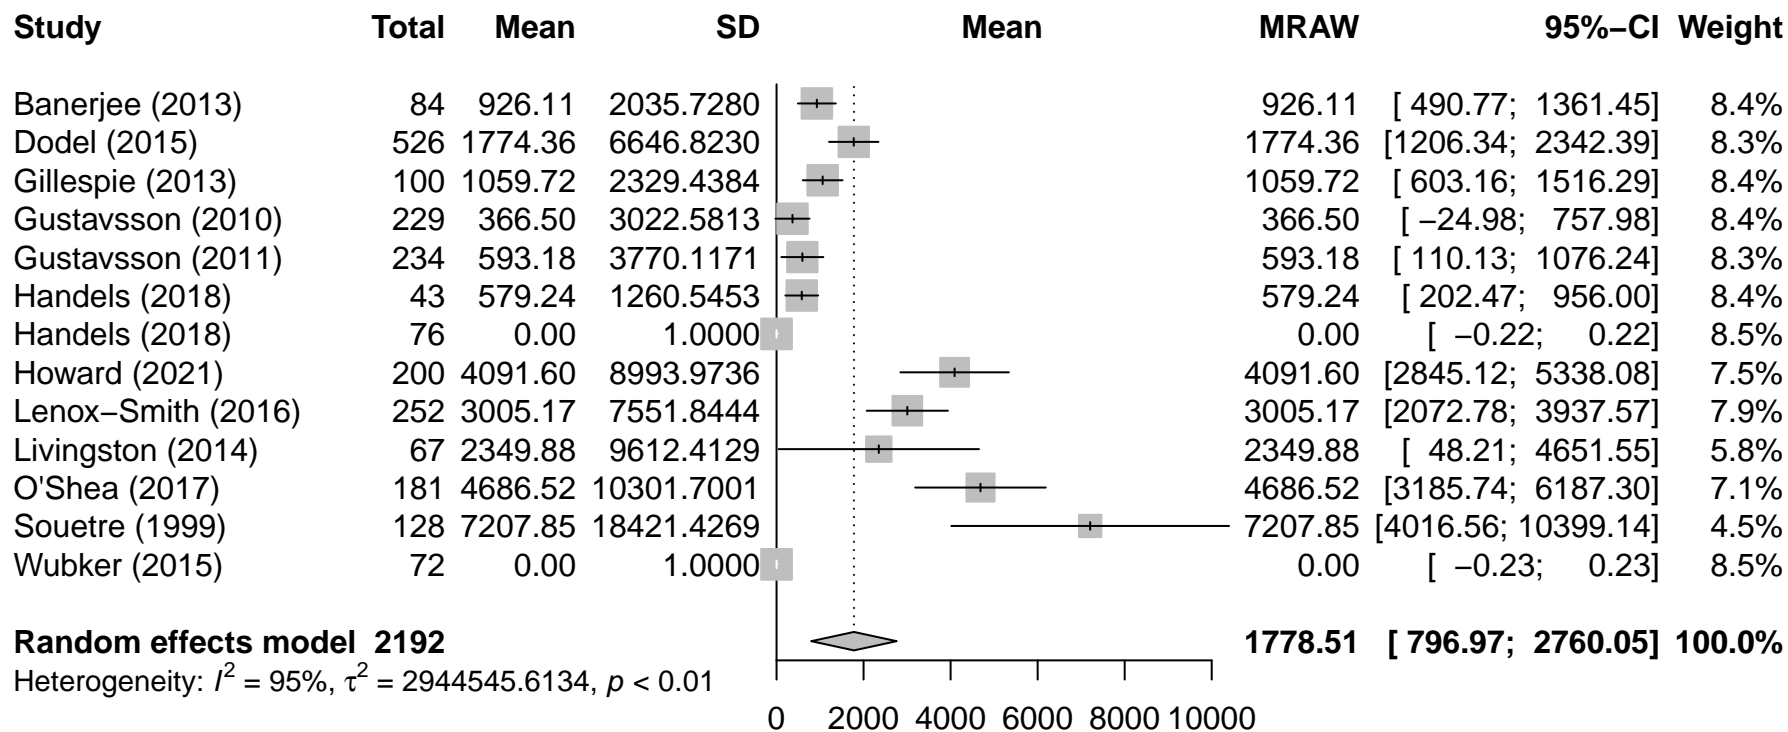

British Isles, Community, All, Community care

| Study              | Total | Mean     | SD         | Mean | MRAW     | 95%-CI              | Weight |
|--------------------|-------|----------|------------|------|----------|---------------------|--------|
| Banerjee (2013)    | 84    | 1674.53  | 4768.3916  |      | 1674.53  | [ 654.81; 2694.25]  | 6.1%   |
| Dodel (2015)       | 526   | 3717.71  | 6804.8758  |      | 3717.71  | [3136.18; 4299.25]  | 6.2%   |
| Ferry (2018)       | 30    | 426.88   | 734.9132   |      | 426.88   | [ 163.90; 689.86]   | 6.3%   |
| Gillespie (2013)   | 100   | 2799.09  | 6312.7532  |      | 2799.09  | [1561.82; 4036.37]  | 6.0%   |
| Gustavsson (2010)  | 229   | 2238.71  | 5949.2170  |      | 2238.71  | [1468.18; 3009.24]  | 6.2%   |
| Gustavsson (2011)  | 234   | 6137.35  | 15726.0109 |      | 6137.35  | [4122.43; 8152.27]  | 5.6%   |
| Handels (2018)     | 43    | 879.14   | 604.9169   |      | 879.14   | [ 698.33; 1059.94]  | 6.3%   |
| Handels (2018)     | 76    | 2223.83  | 1714.3590  |      | 2223.83  | [1838.40; 2609.26]  | 6.2%   |
| Howard (2021)      | 203   | 10963.32 | 31874.9439 |      | 10963.32 | [6578.52; 15348.11] | 4.1%   |
| Lenox-Smith (2016) | 252   | 7344.66  | 21472.0969 |      | 7344.66  | [4693.58; 9995.73]  | 5.2%   |
| Livingston (2014)  | 67    | 4089.19  | 6997.4188  |      | 4089.19  | [2413.68; 5764.71]  | 5.8%   |
| Longo (2019)       | 323   | 6071.99  | 4895.8708  |      | 6071.99  | [5538.07; 6605.91]  | 6.2%   |
| O'Shea (2017)      | 181   | 9952.38  | 14795.0104 |      | 9952.38  | [7797.00; 12107.77] | 5.5%   |
| Rubinsztein (2015) | 66    | 78.96    | 68.4316    |      | 78.96    | [ 62.45; 95.47]     | 6.3%   |
| Souetre (1999)     | 128   | 6144.77  | 9910.0932  |      | 6144.77  | [4427.96; 7861.57]  | 5.8%   |
| Walsh (2019)       | 253   | 997.92   | 1001.3066  |      | 997.92   | [ 874.54; 1121.30]  | 6.3%   |
| Wubker (2015)      | 72    | 7273.48  | 6453.4742  |      | 7273.48  | [5782.83; 8764.13]  | 5.9%   |

**Random effects model 2867**

Heterogeneity:  $I^2 = 99\%$ ,  $\tau^2 = 9113656.2029$ ,  $p < 0.01$

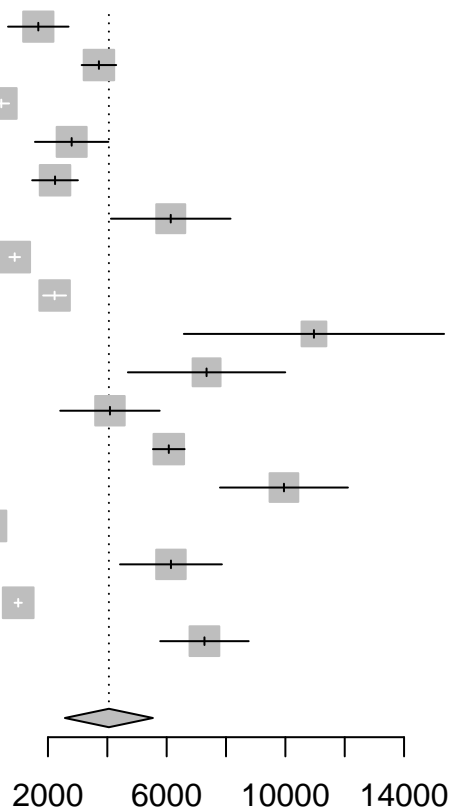

**4053.34 [2571.01; 5535.67] 100.0%**

British Isles, Community, All, Caregiver work loss

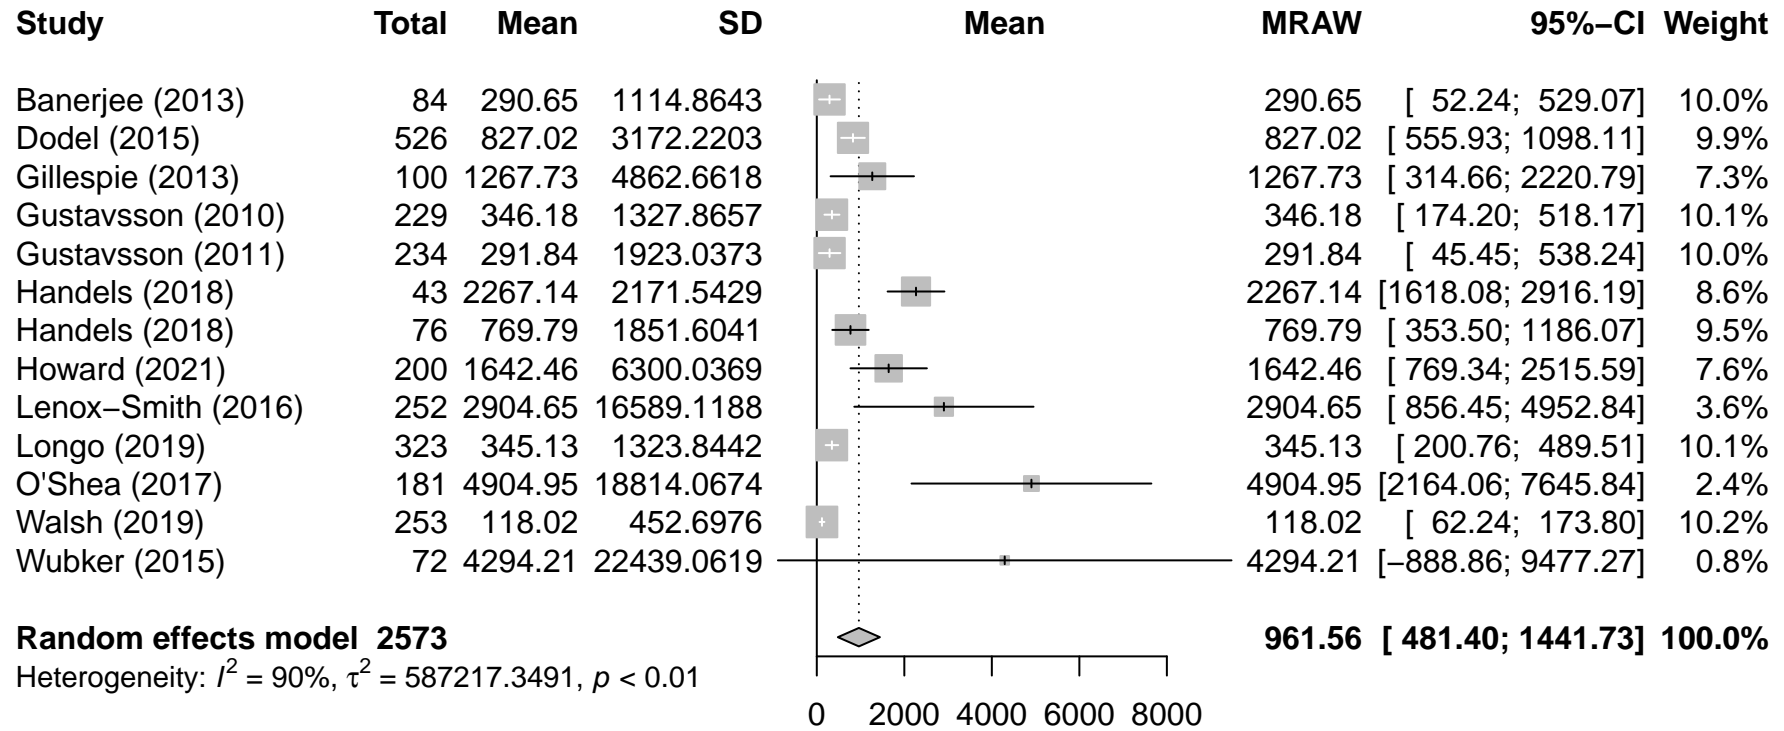

British Isles, Community, All, Caregiver time

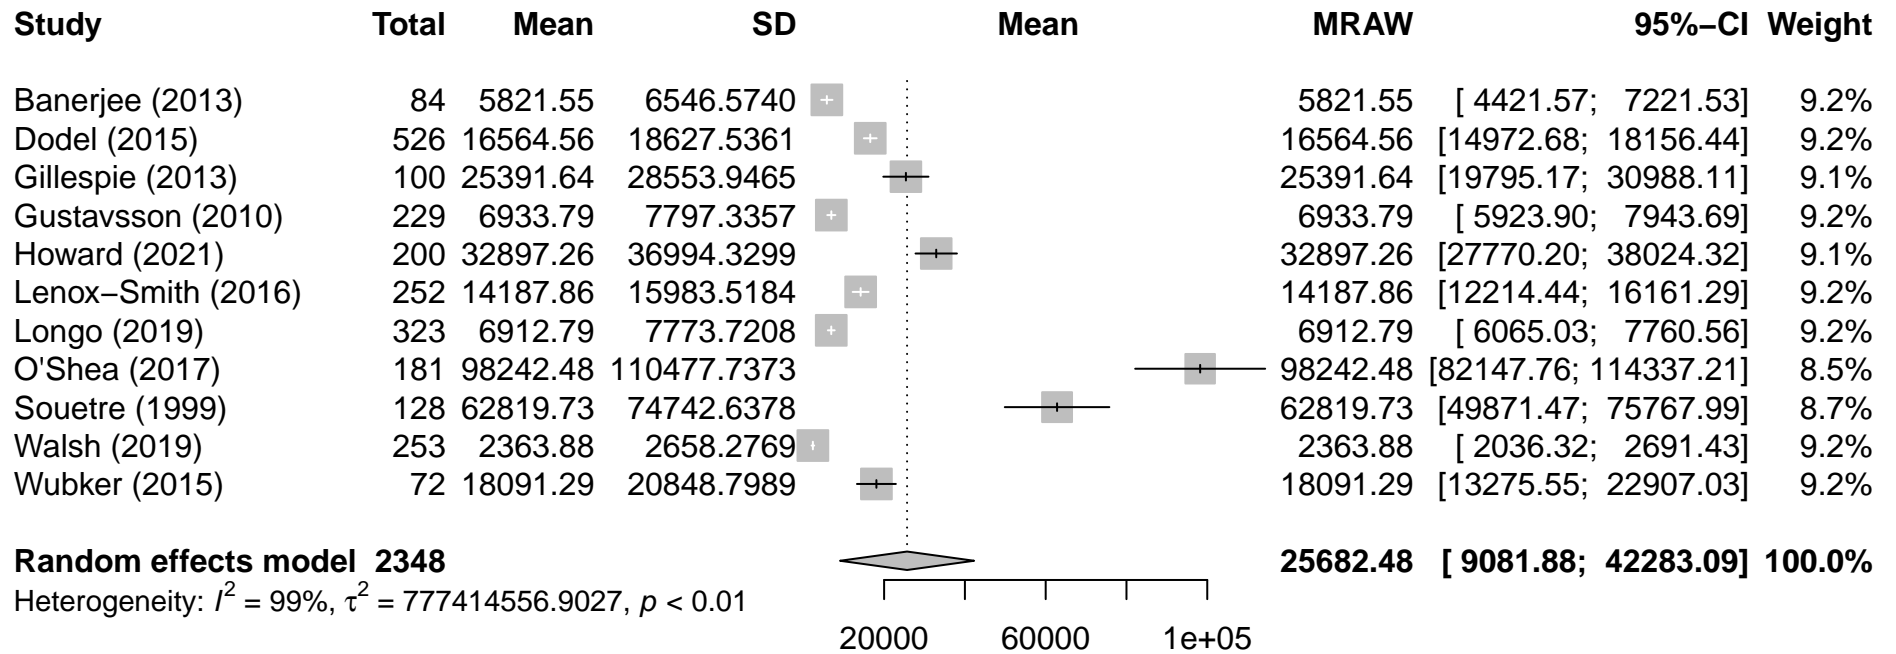

British Isles, Institution, Mild, Inpatient care

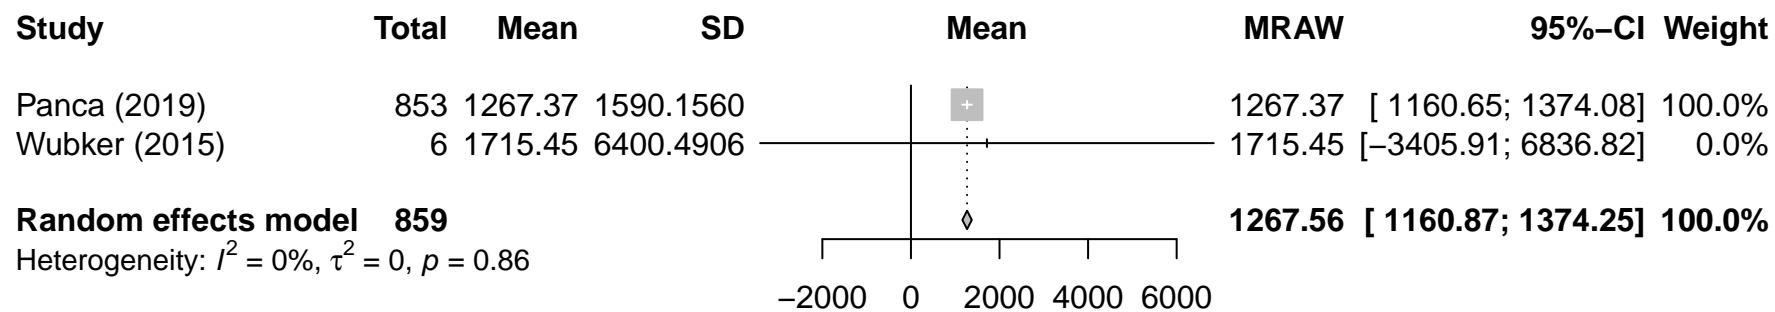

British Isles, Institution, Mild, Outpatient care

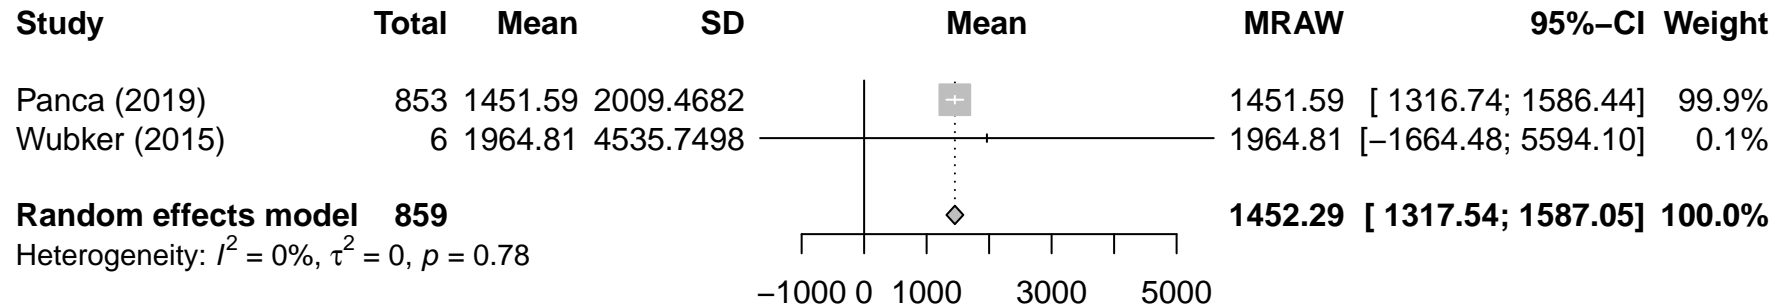

British Isles, Institution, Mild, Pharmaceuticals

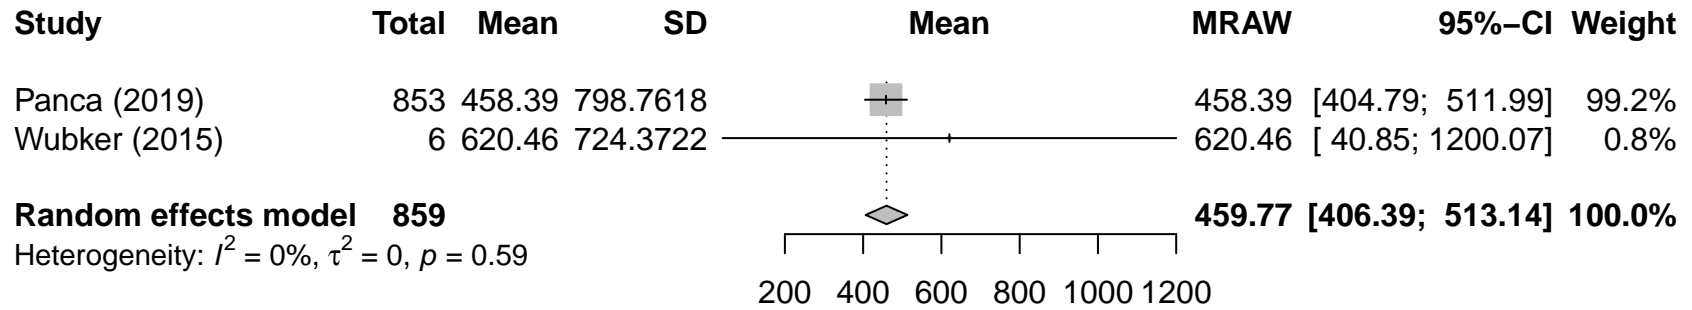

British Isles, Institution, Mild, Institutional care

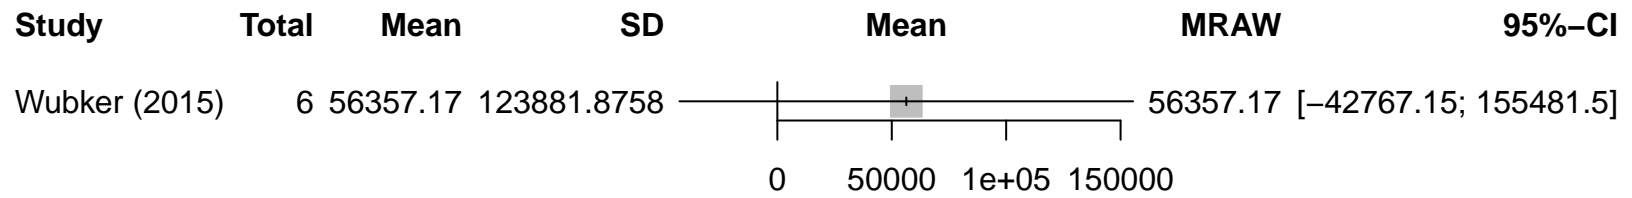



British Isles, Institution, Mild, Community care

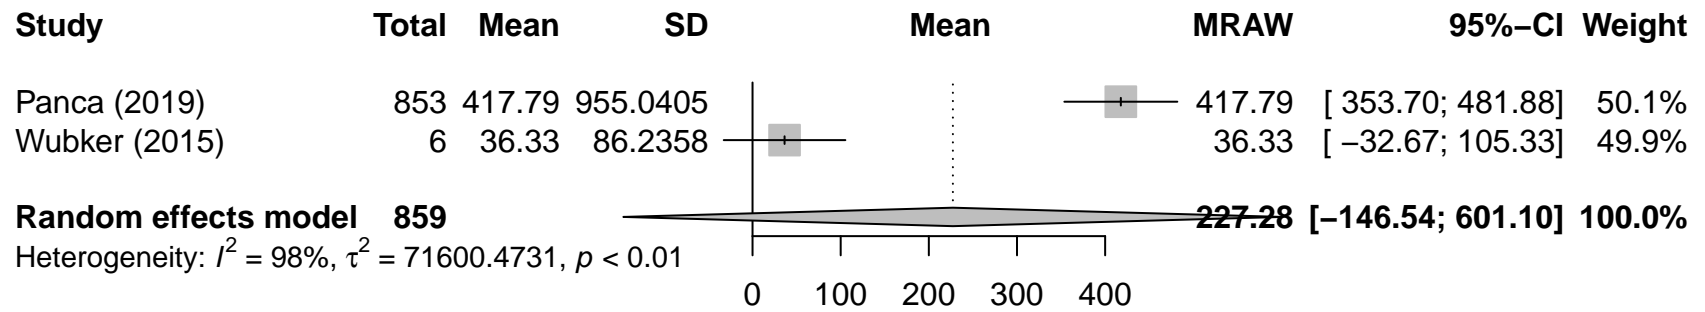

British Isles, Institution, Mild, Caregiver work loss

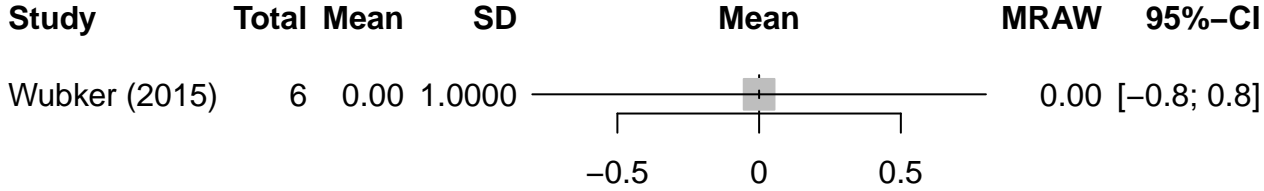

British Isles, Institution, Mild, Caregiver time

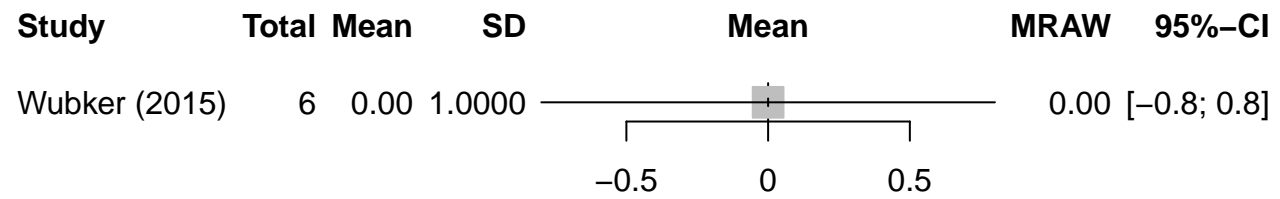

British Isles, Institution, Moderate, Inpatient care

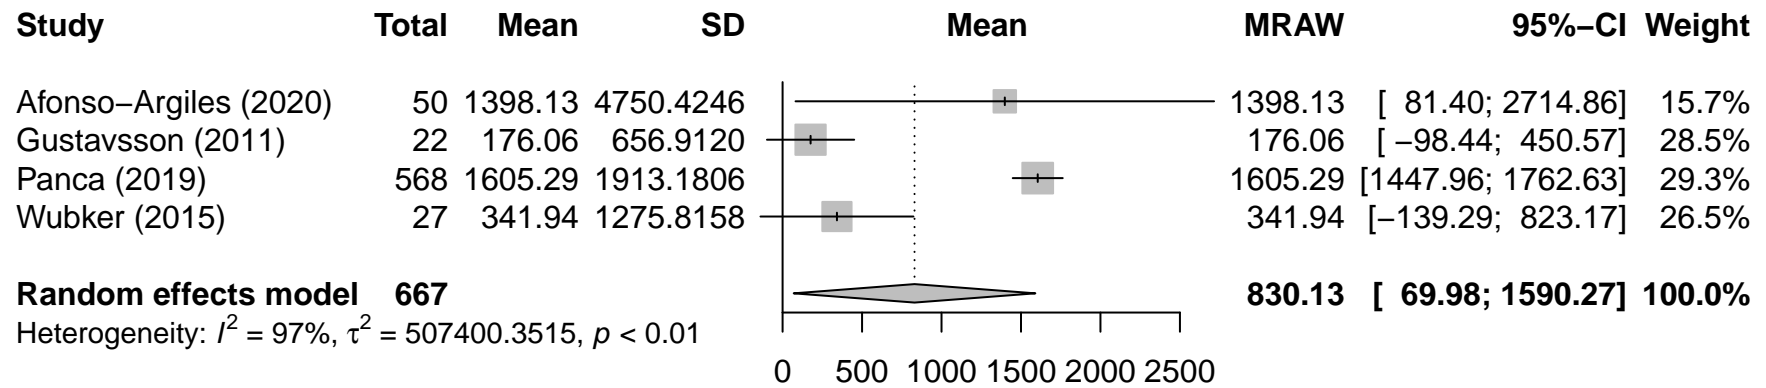

British Isles, Institution, Moderate, Outpatient care

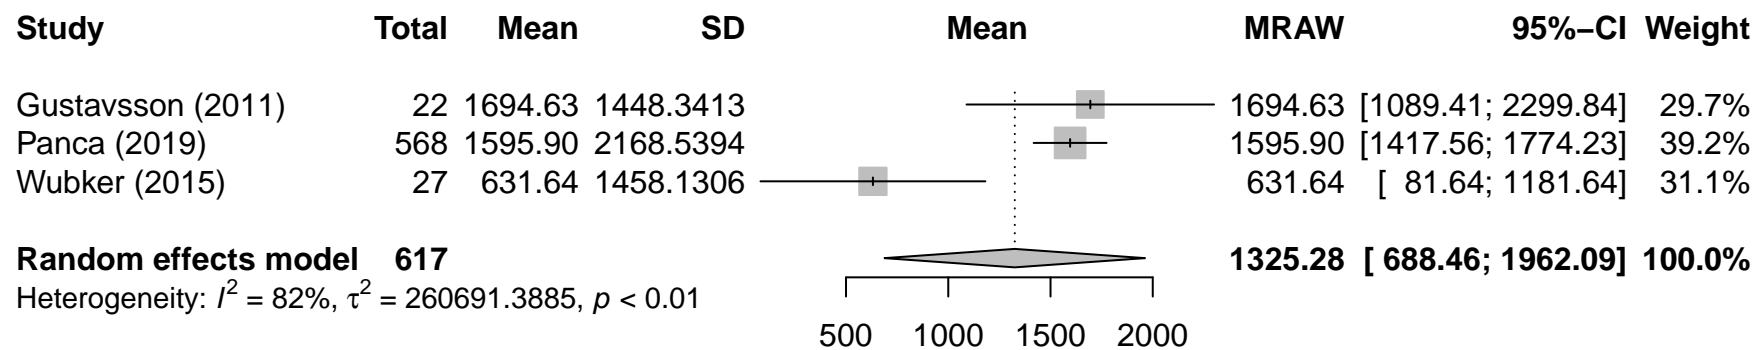

British Isles, Institution, Moderate, Pharmaceuticals

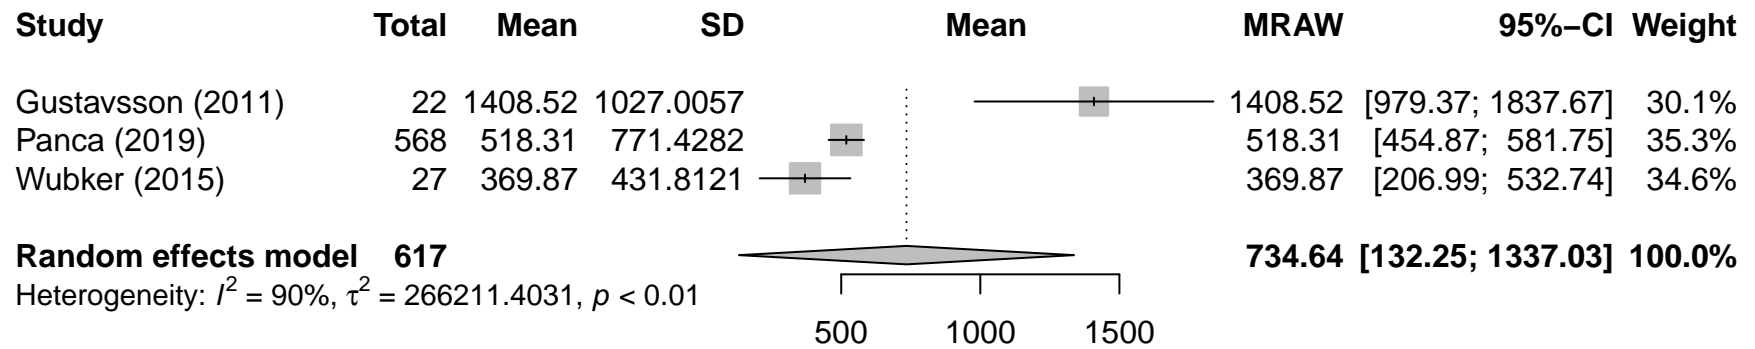

British Isles, Institution, Moderate, Institutional care

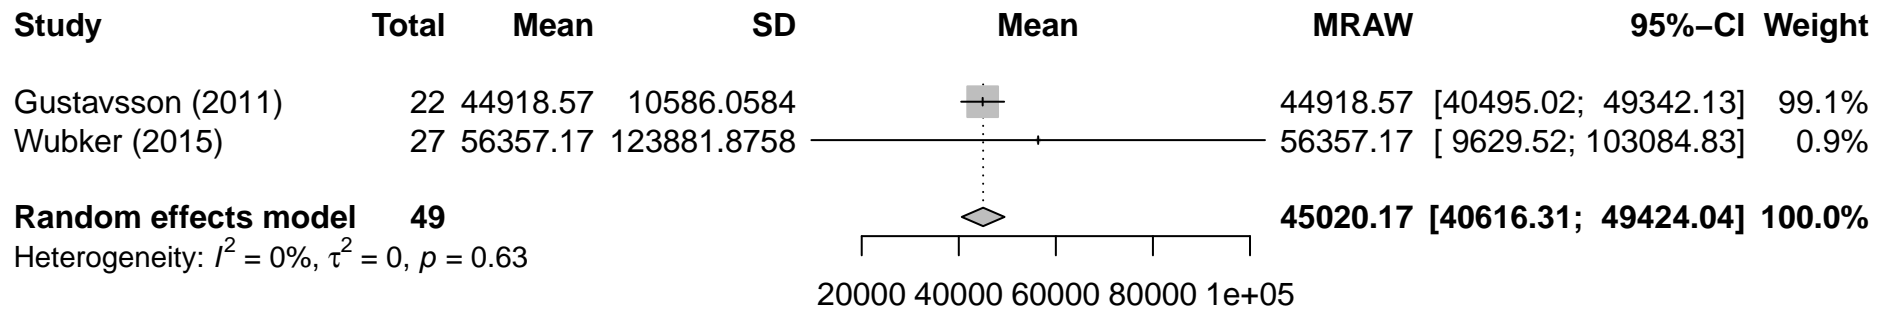

British Isles, Institution, Moderate, Community care

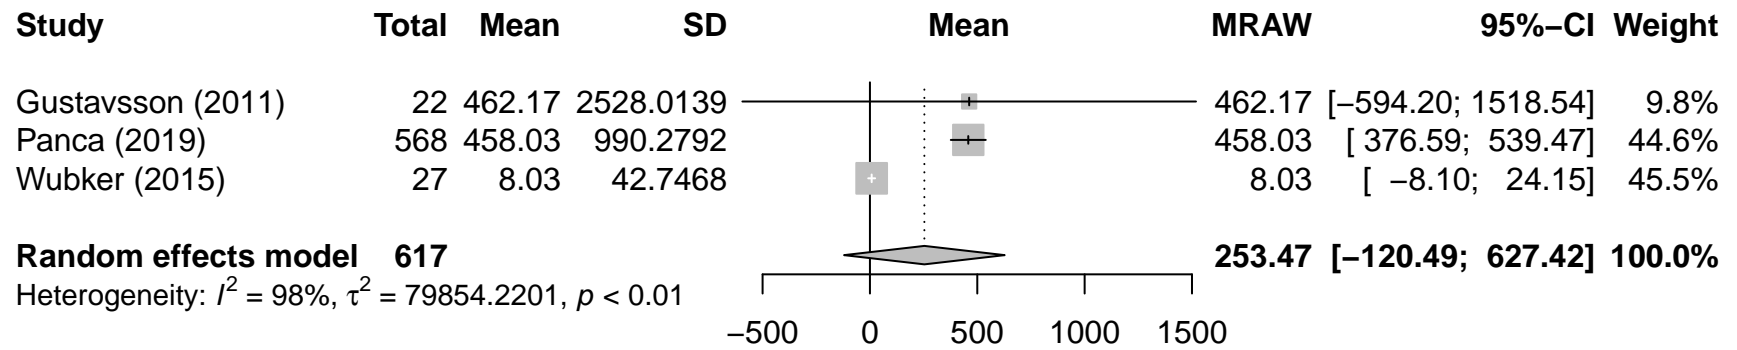



British Isles, Institution, Moderate, Caregiver work loss

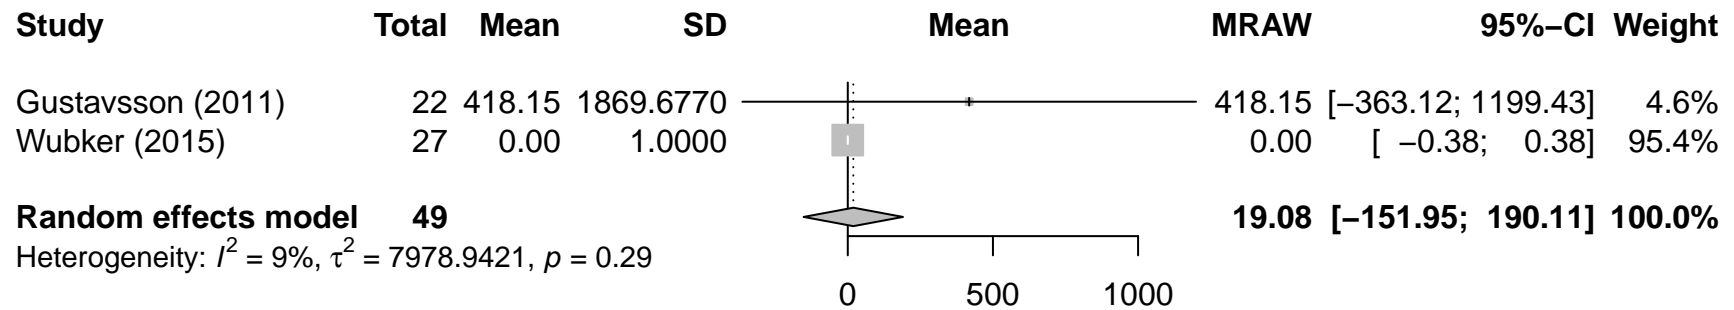

British Isles, Institution, Moderate, Caregiver time

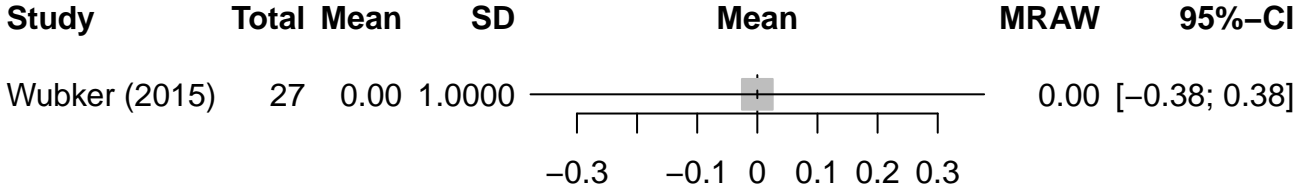

British Isles, Institution, Severe, Inpatient care

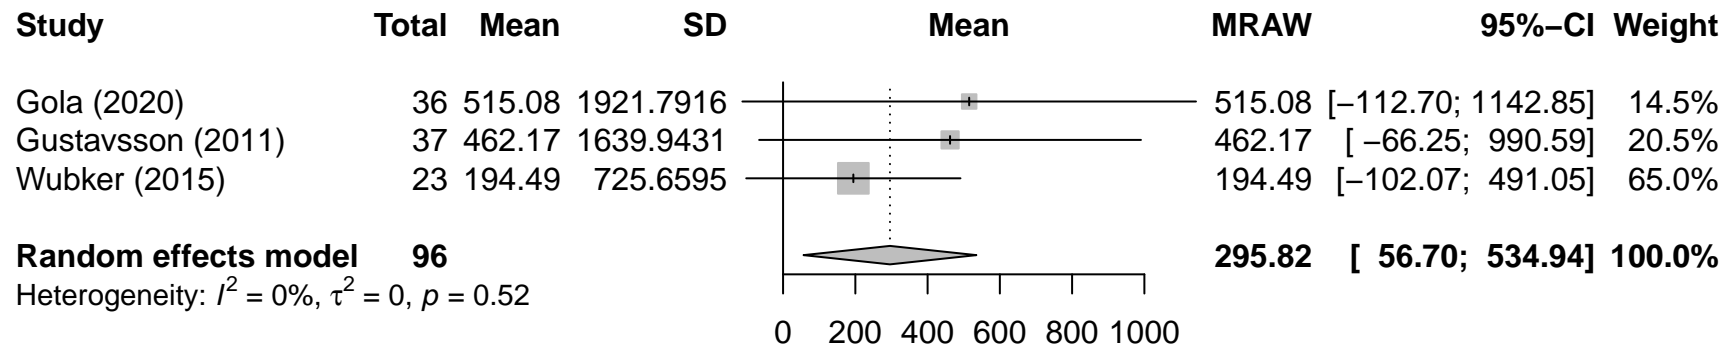

British Isles, Institution, Severe, Outpatient care

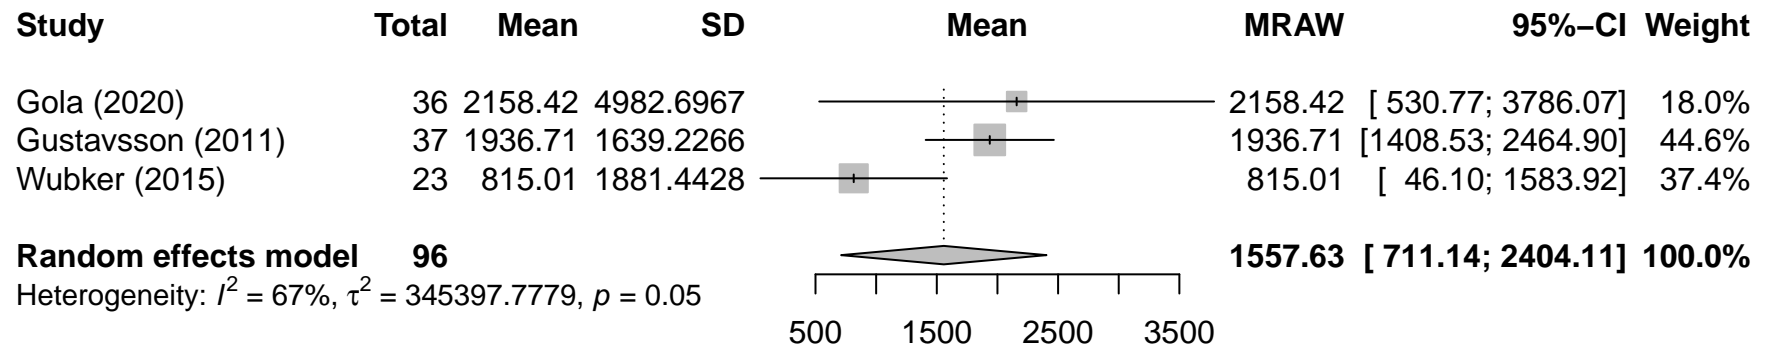

British Isles, Institution, Severe, Pharmaceuticals

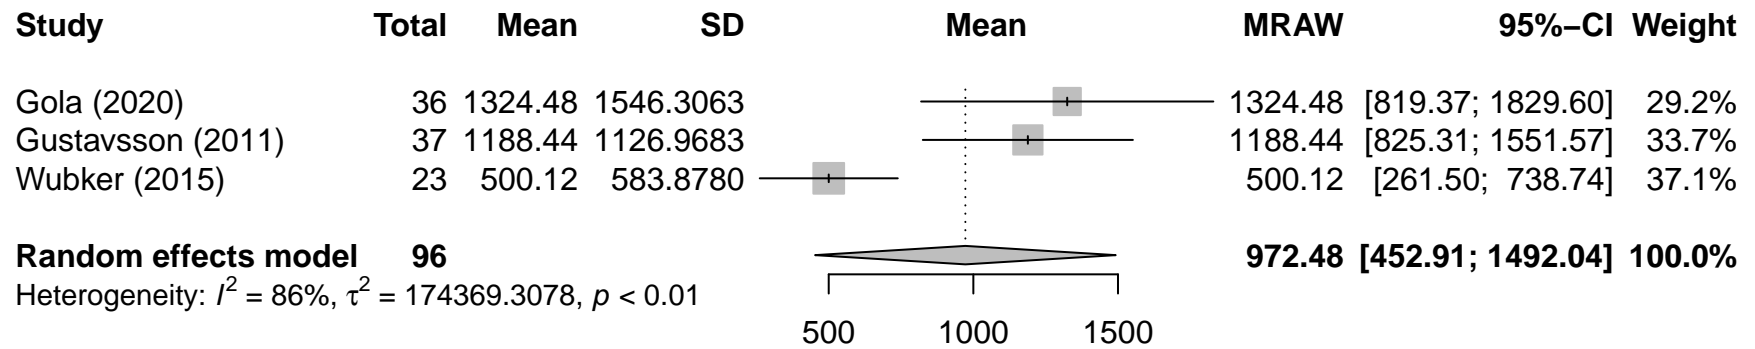

British Isles, Institution, Severe, Institutional care

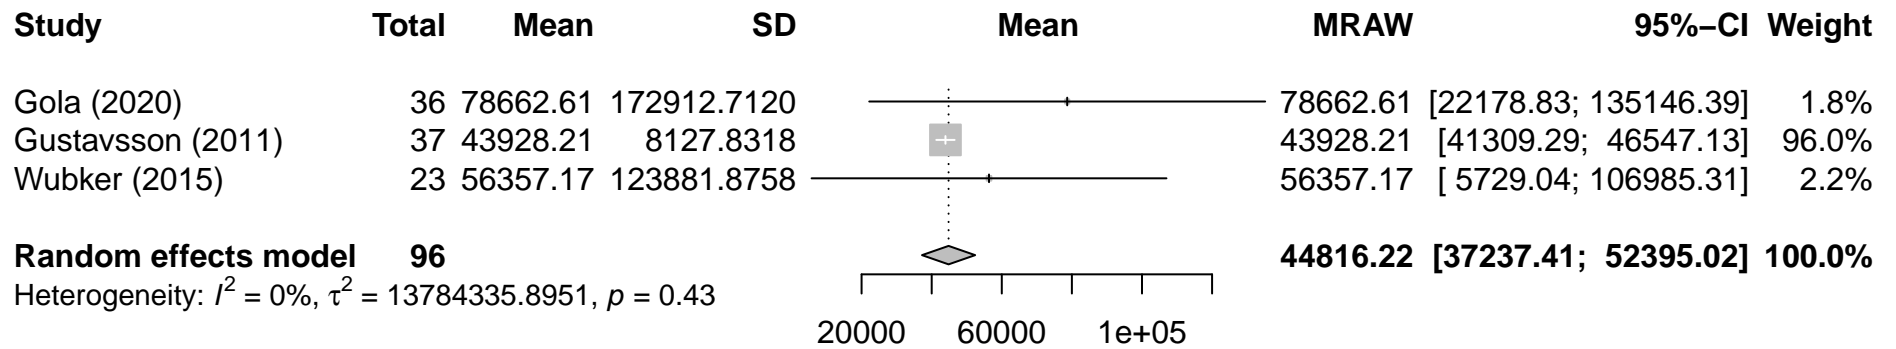

British Isles, Institution, Severe, Community care

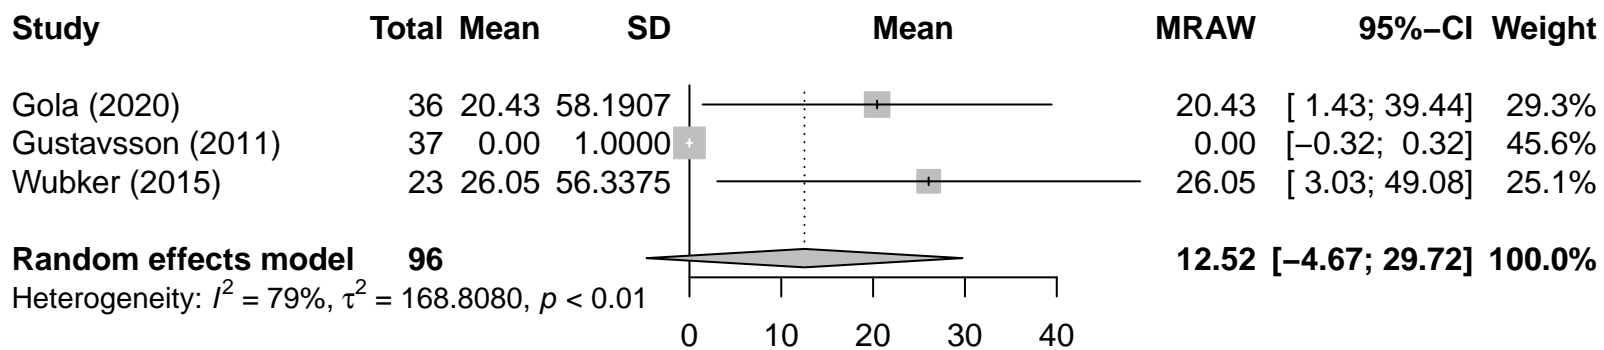

British Isles, Institution, Severe, Caregiver work loss

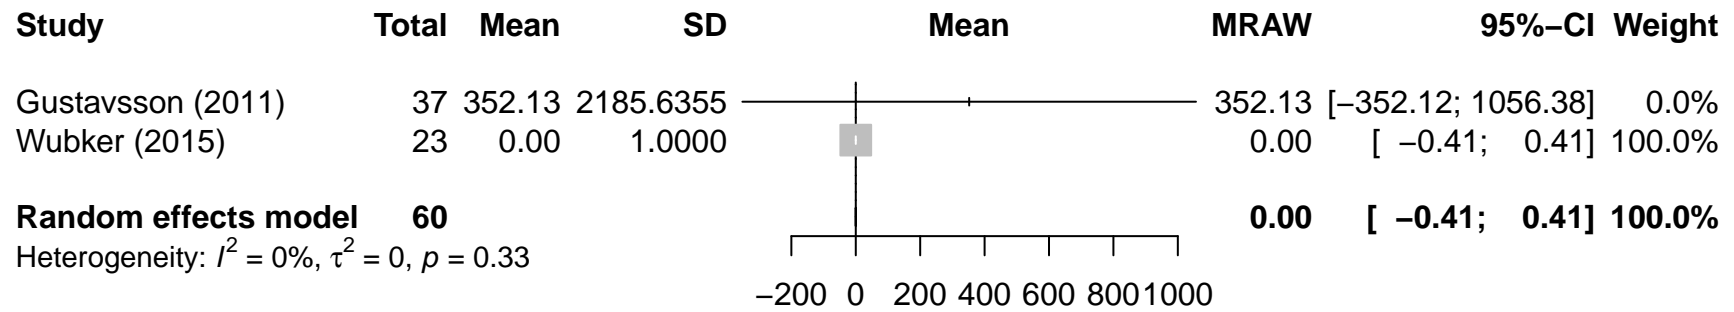



British Isles, Institution, Severe, Caregiver time



British Isles, Institution, All, Inpatient care

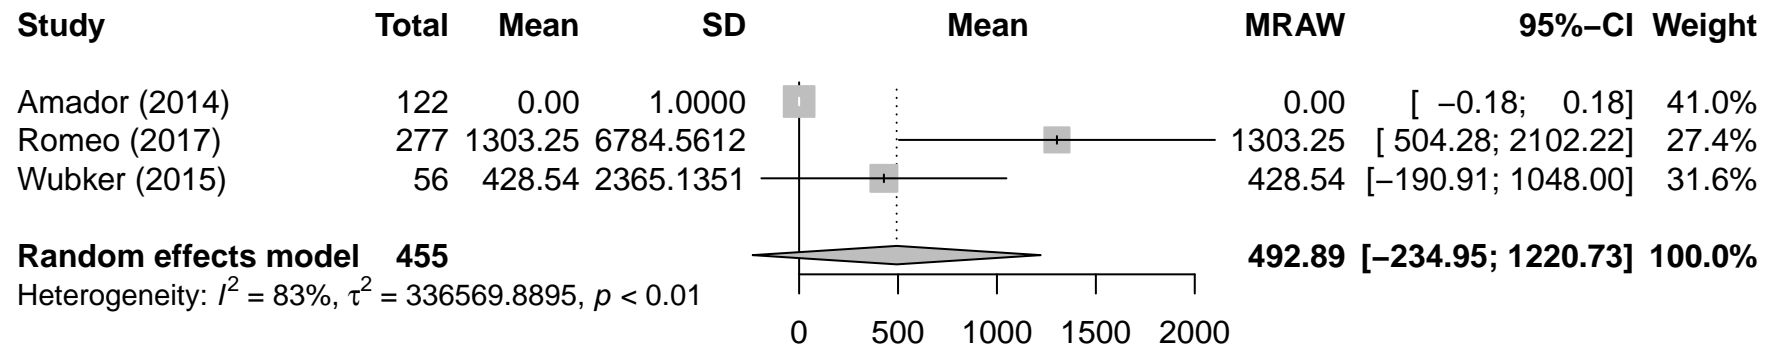

British Isles, Institution, All, Outpatient care

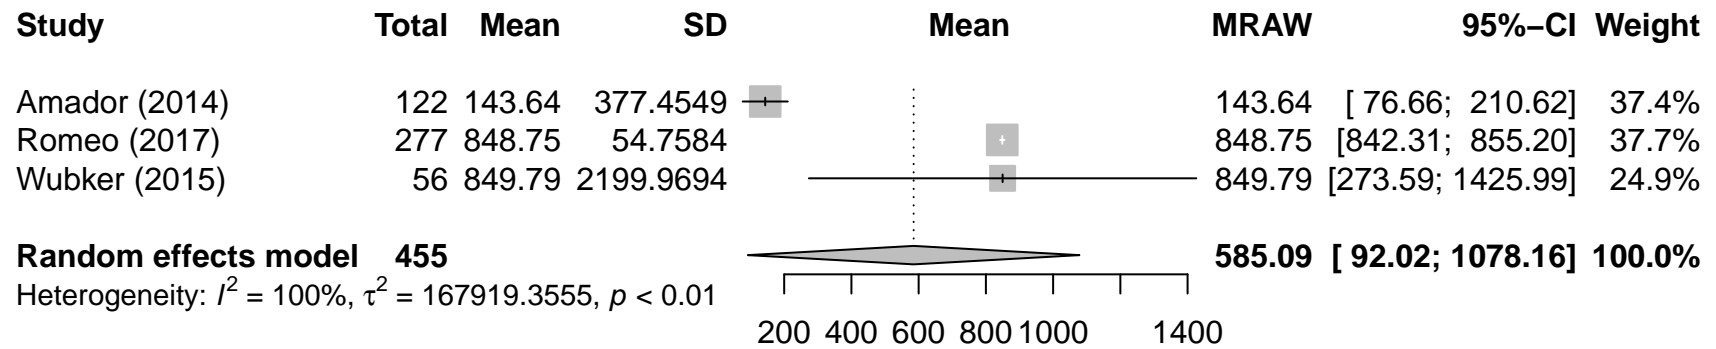

British Isles, Institution, All, Pharmaceuticals

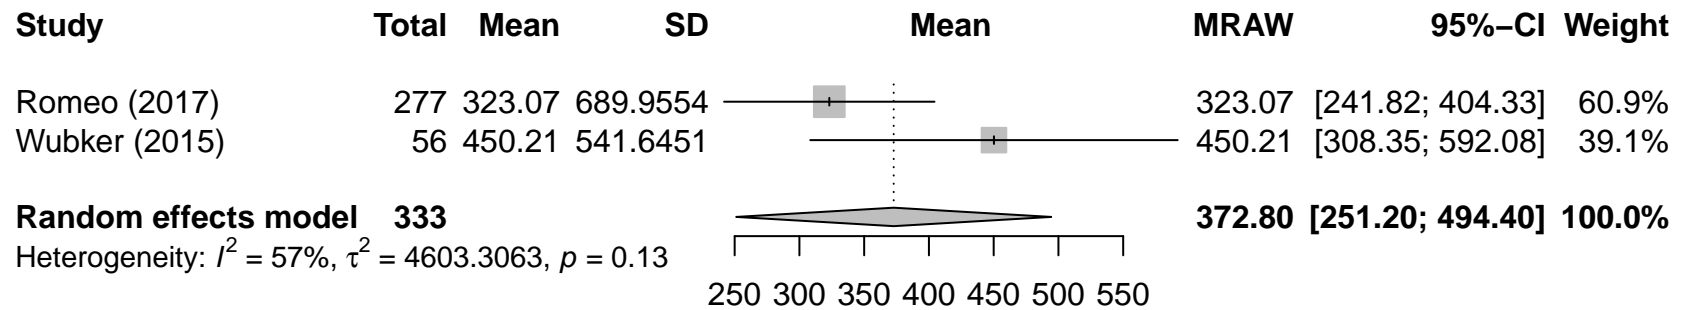

British Isles, Institution, All, Institutional care

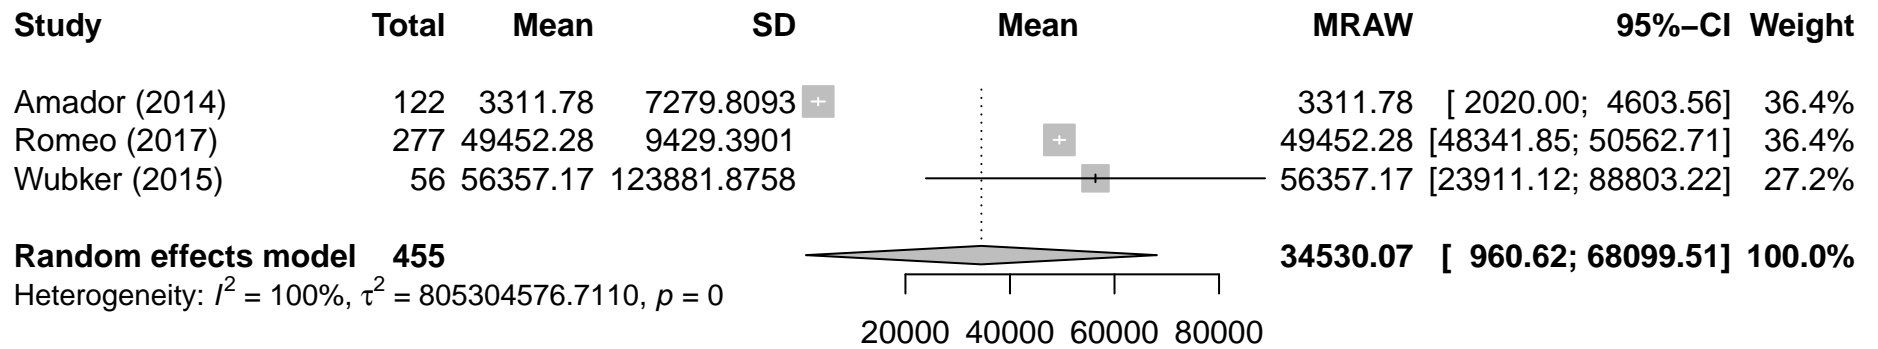

British Isles, Institution, All, Community care

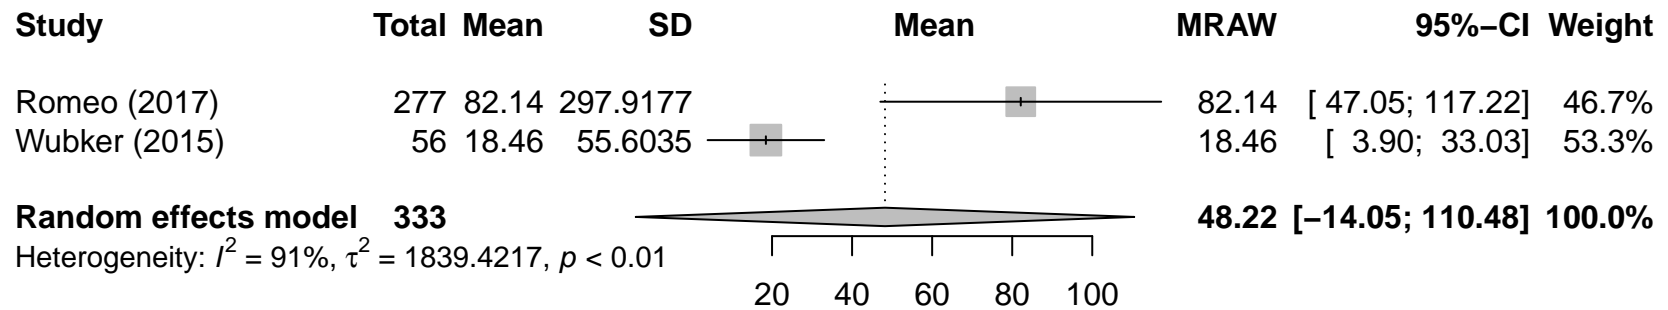

British Isles, Institution, All, Caregiver work loss



British Isles, Institution, All, Caregiver time





British Isles, All, Mild, Inpatient care

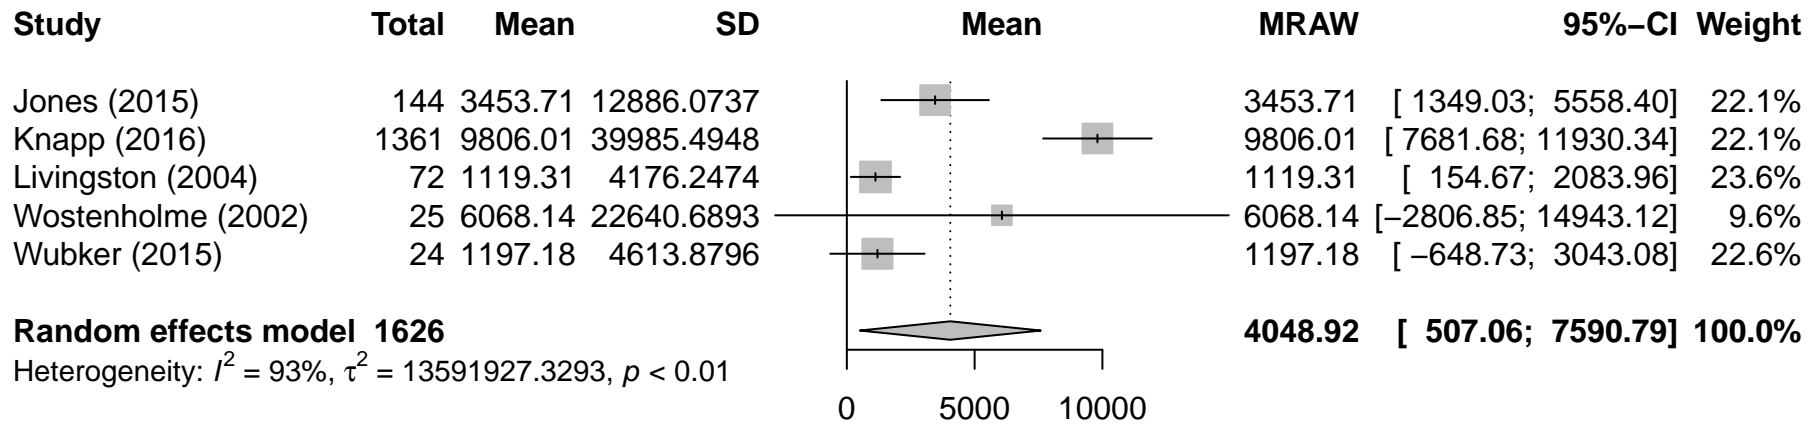

British Isles, All, Mild, Outpatient care

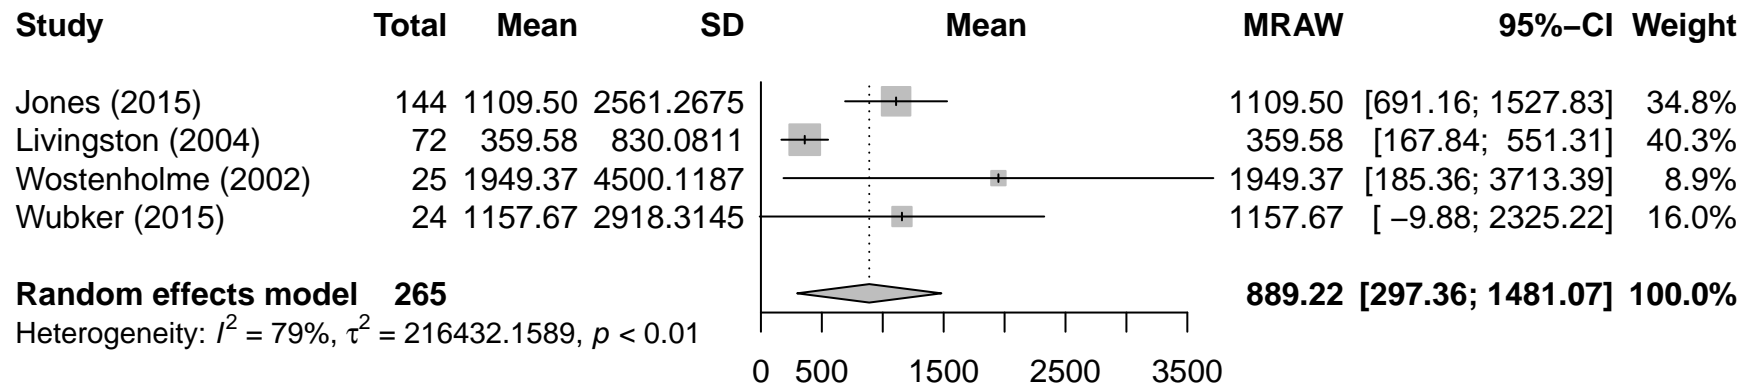

British Isles, All, Mild, Pharmaceuticals

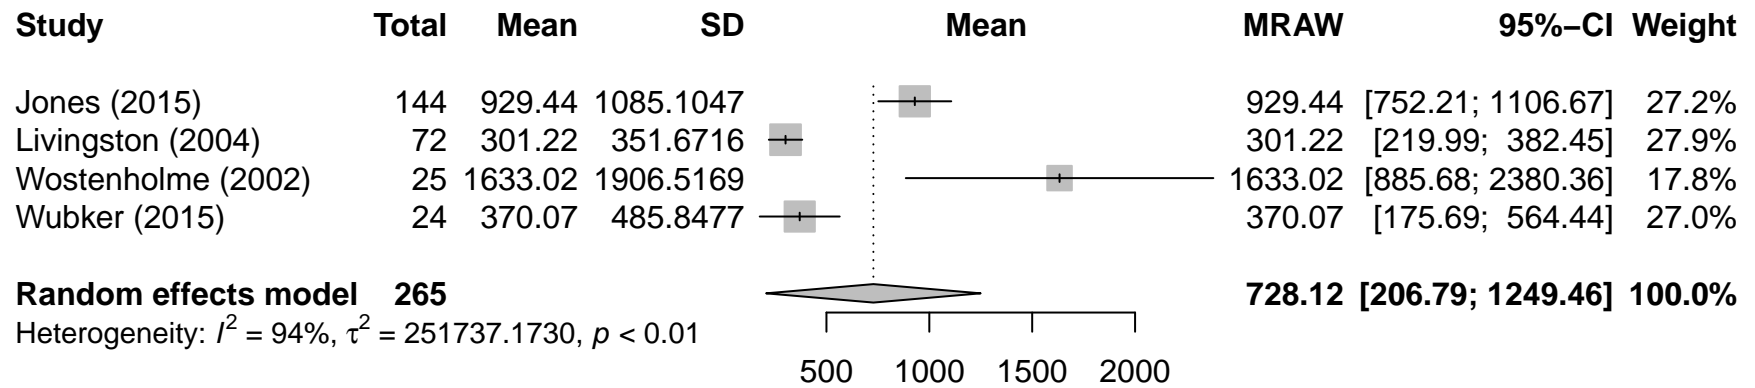

British Isles, All, Mild, Institutional care

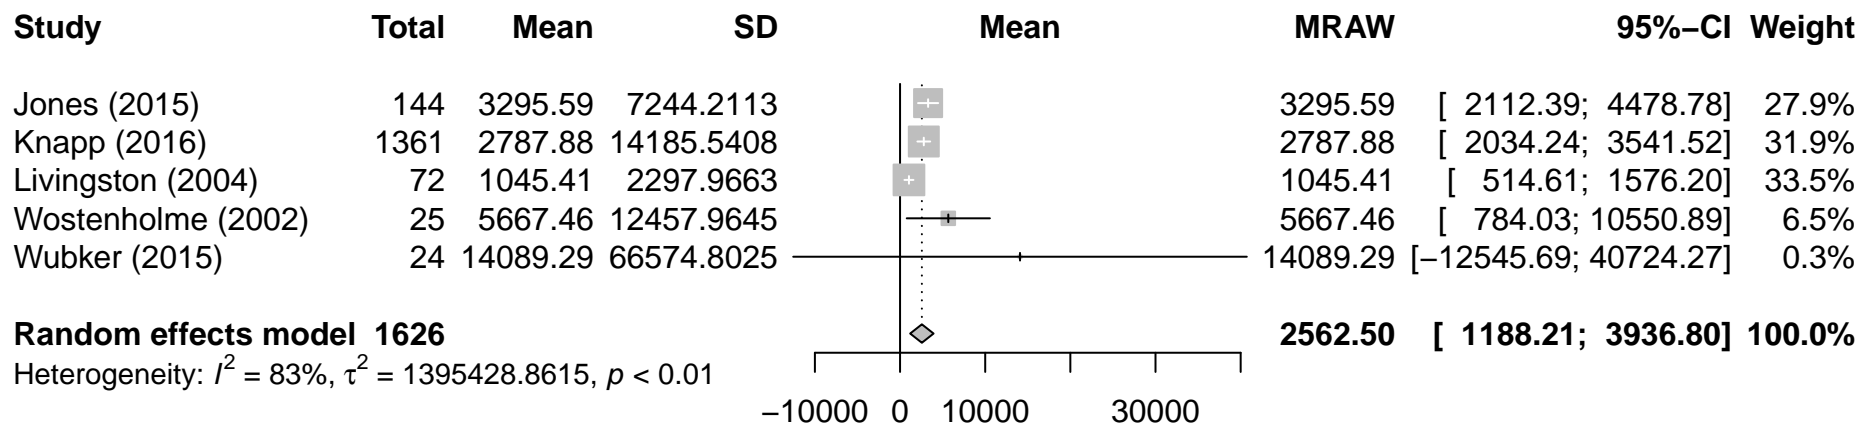

British Isles, All, Mild, Community care

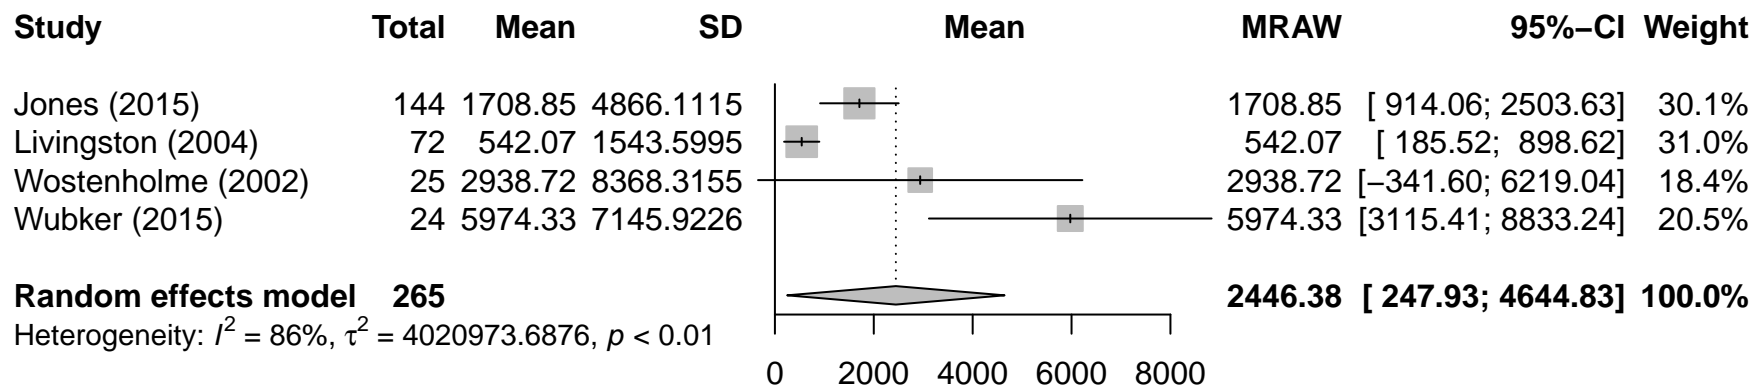

British Isles, All, Mild, Caregiver work loss

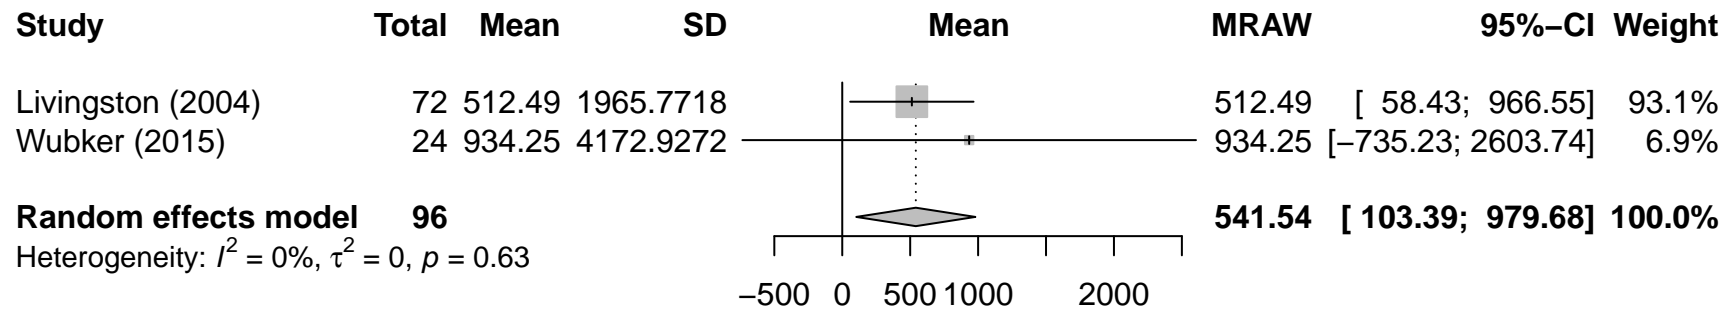

British Isles, All, Mild, Caregiver time

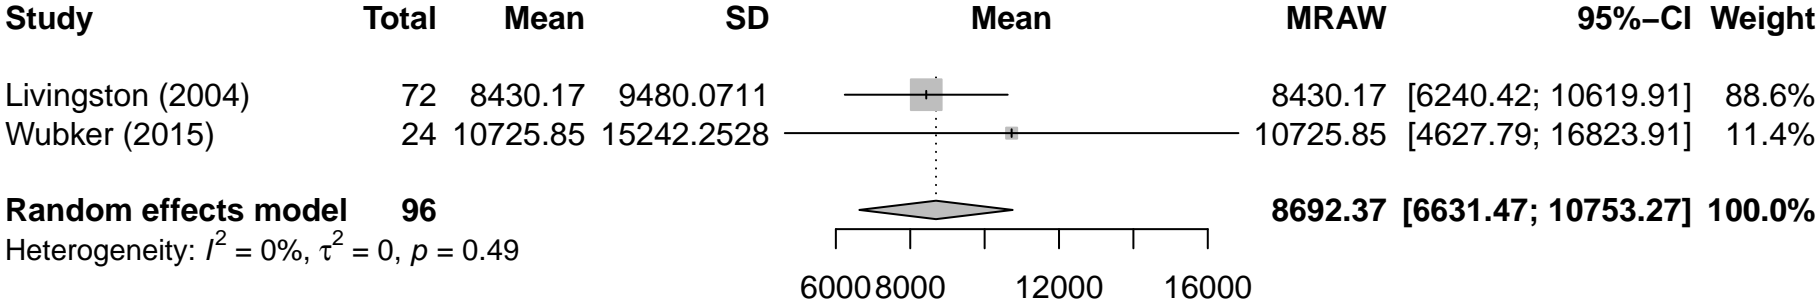

British Isles, All, Moderate, Inpatient care

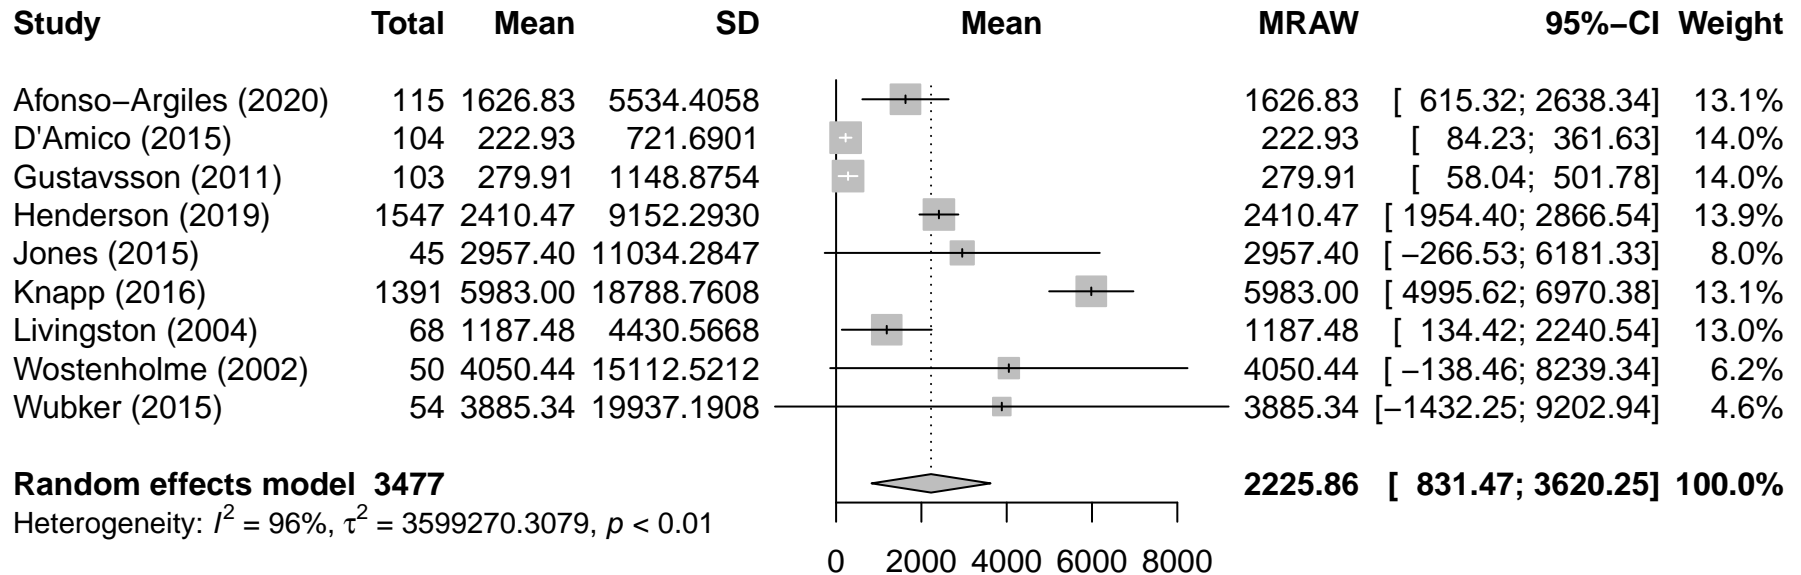



British Isles, All, Moderate, Outpatient care

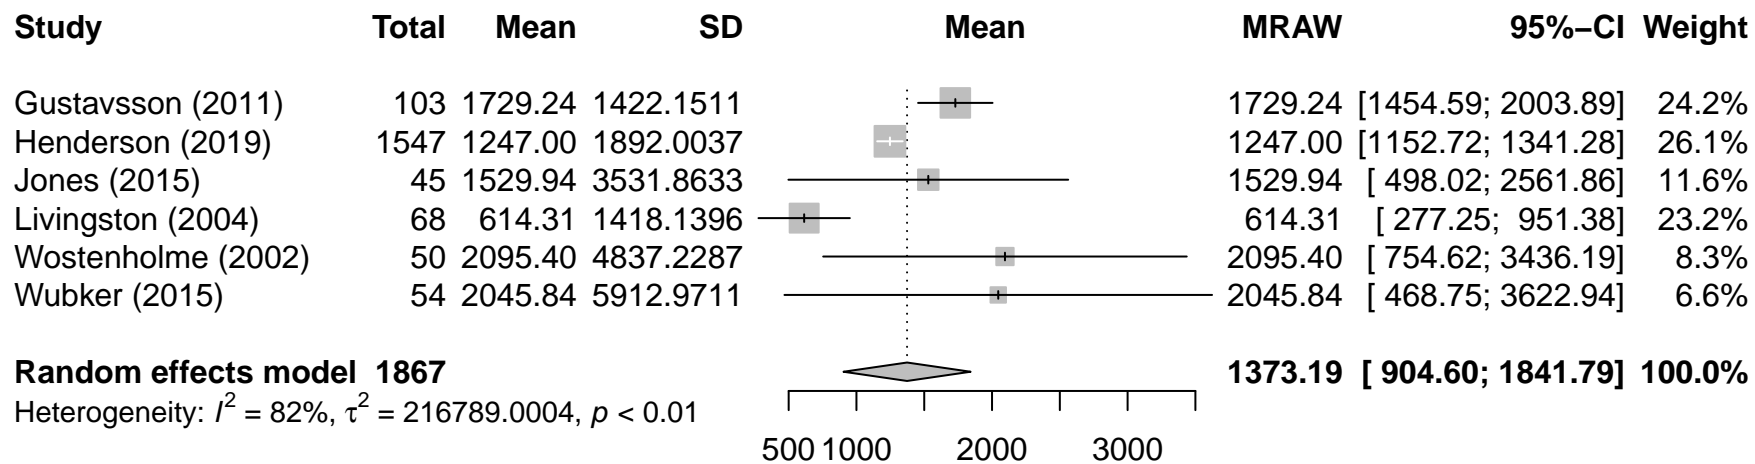

British Isles, All, Moderate, Pharmaceuticals

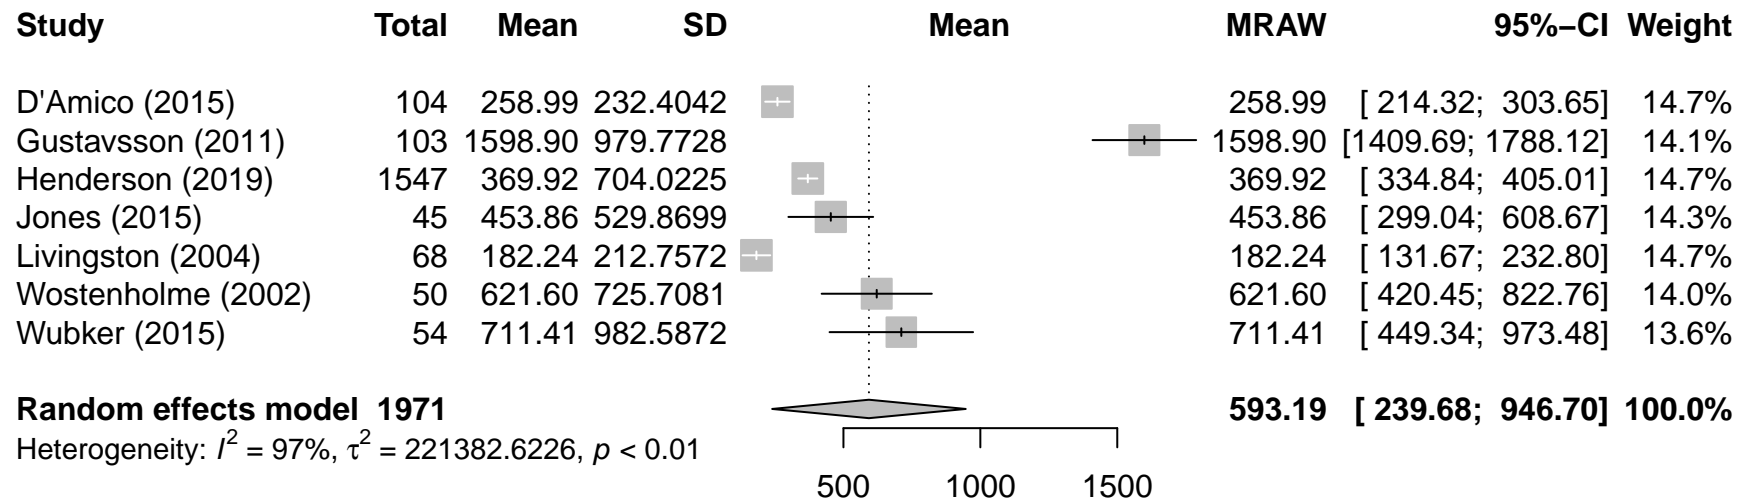

British Isles, All, Moderate, Institutional care

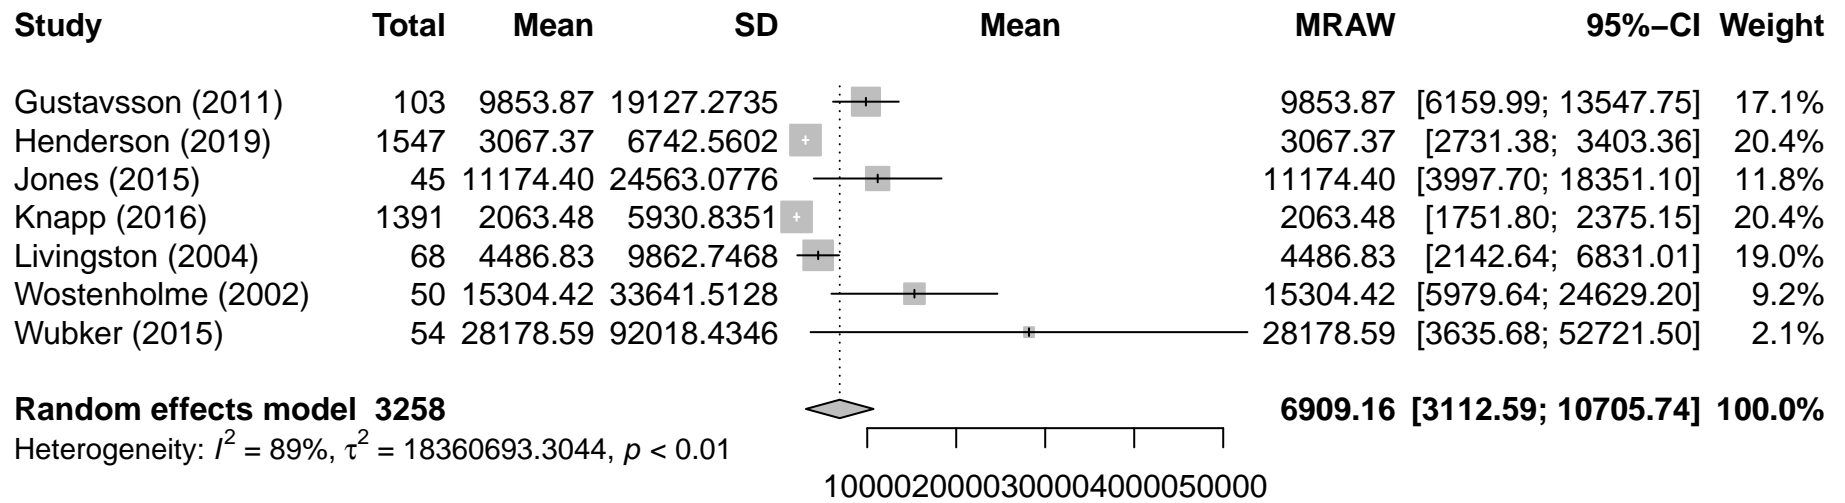

British Isles, All, Moderate, Community care

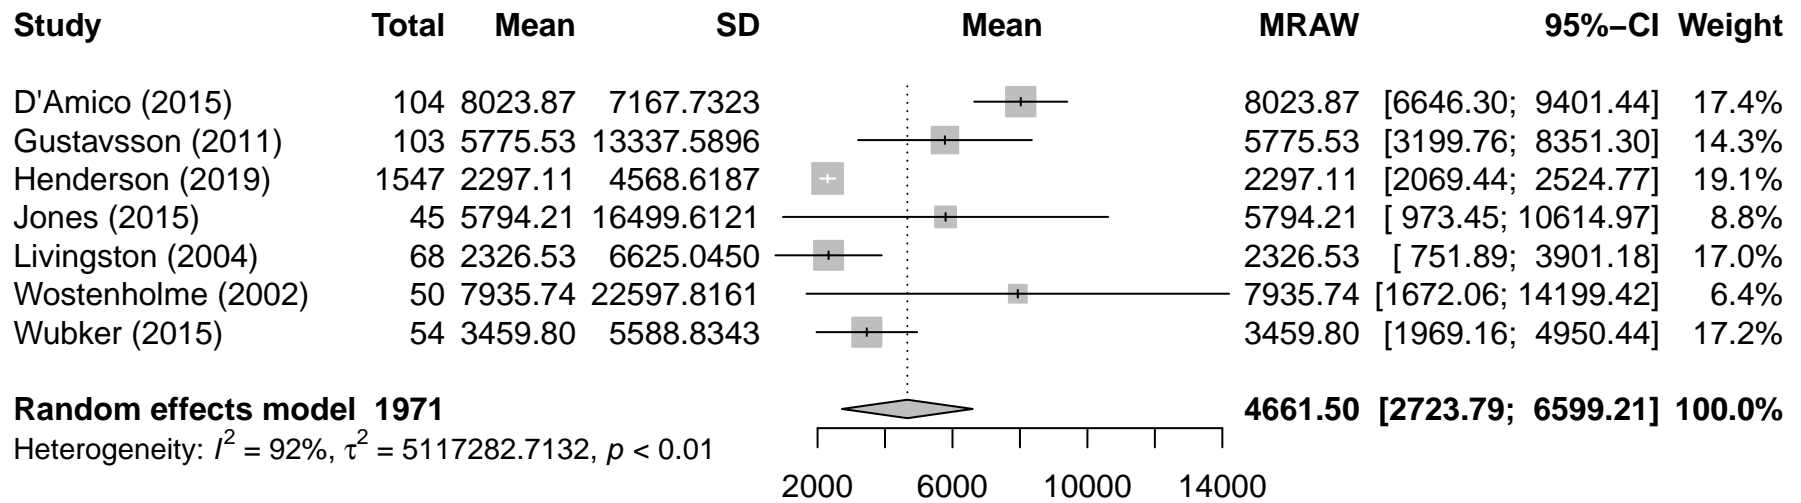

British Isles, All, Moderate, Caregiver work loss

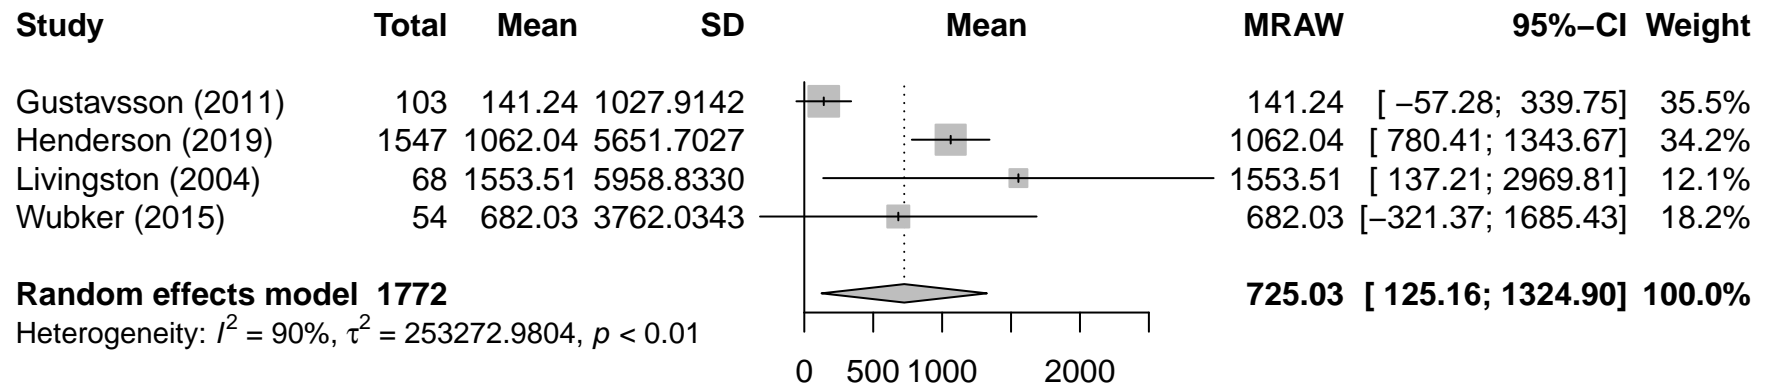

British Isles, All, Moderate, Caregiver time

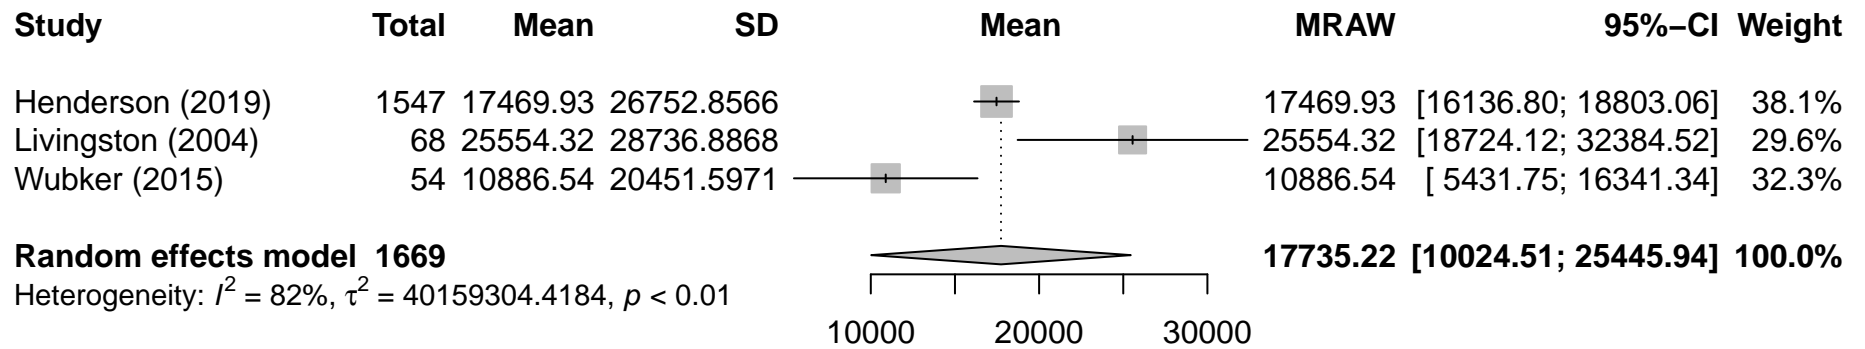

British Isles, All, Severe, Inpatient care

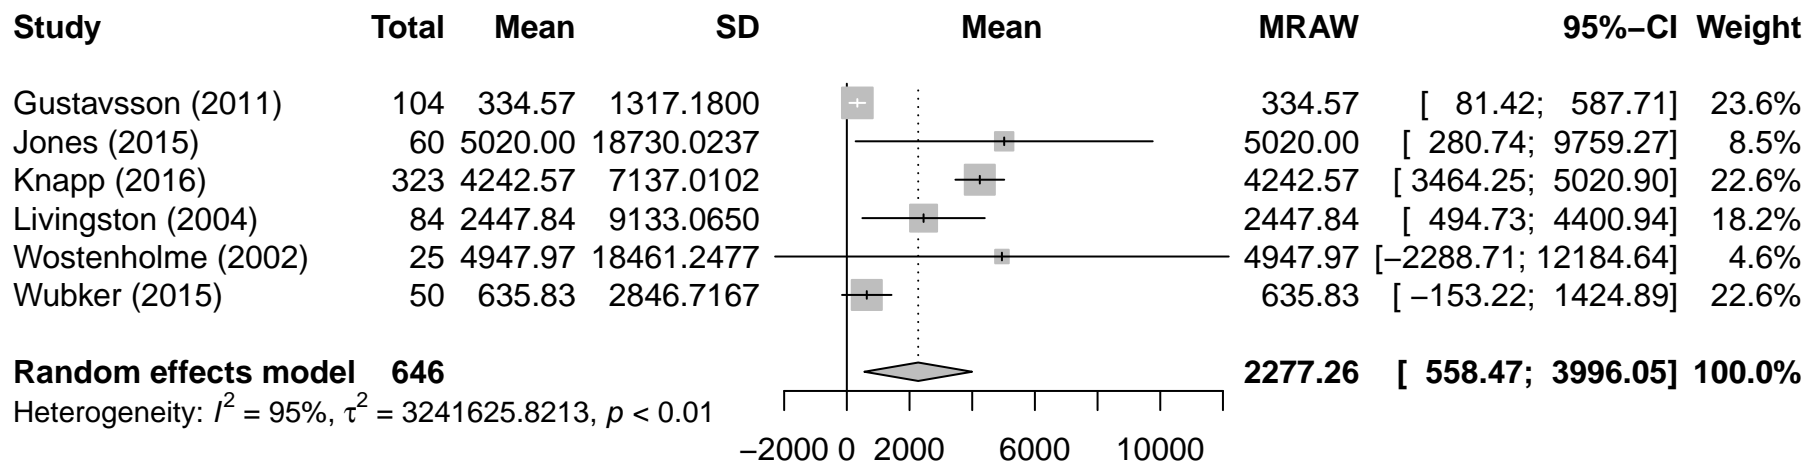

British Isles, All, Severe, Outpatient care

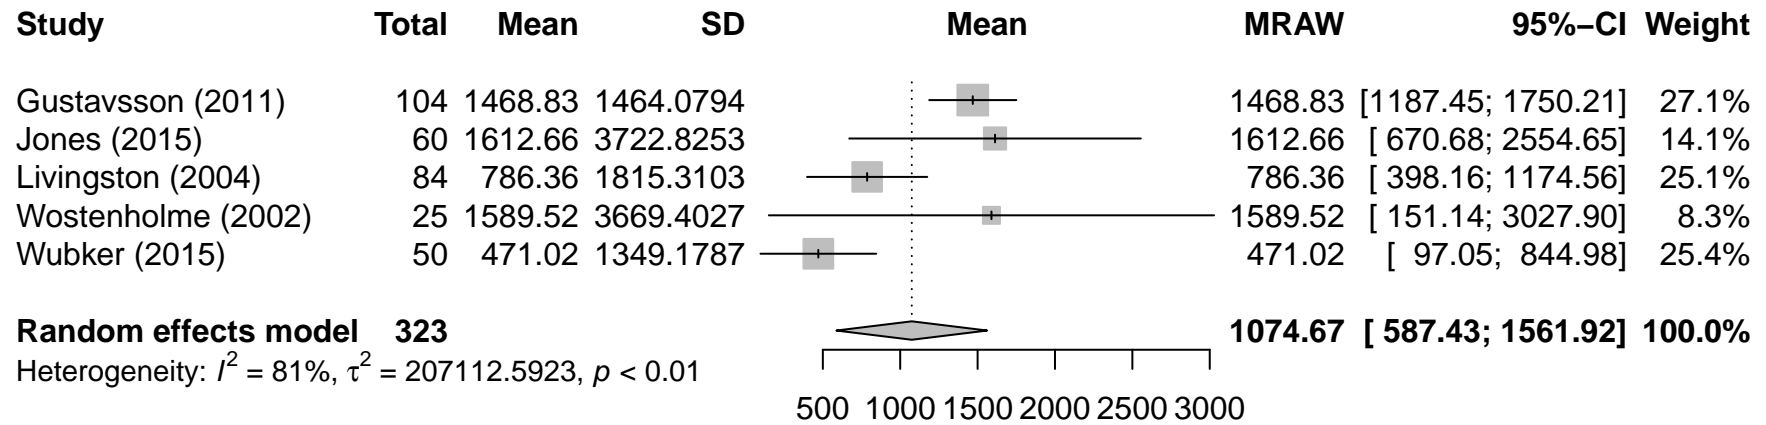



British Isles, All, Severe, Pharmaceuticals

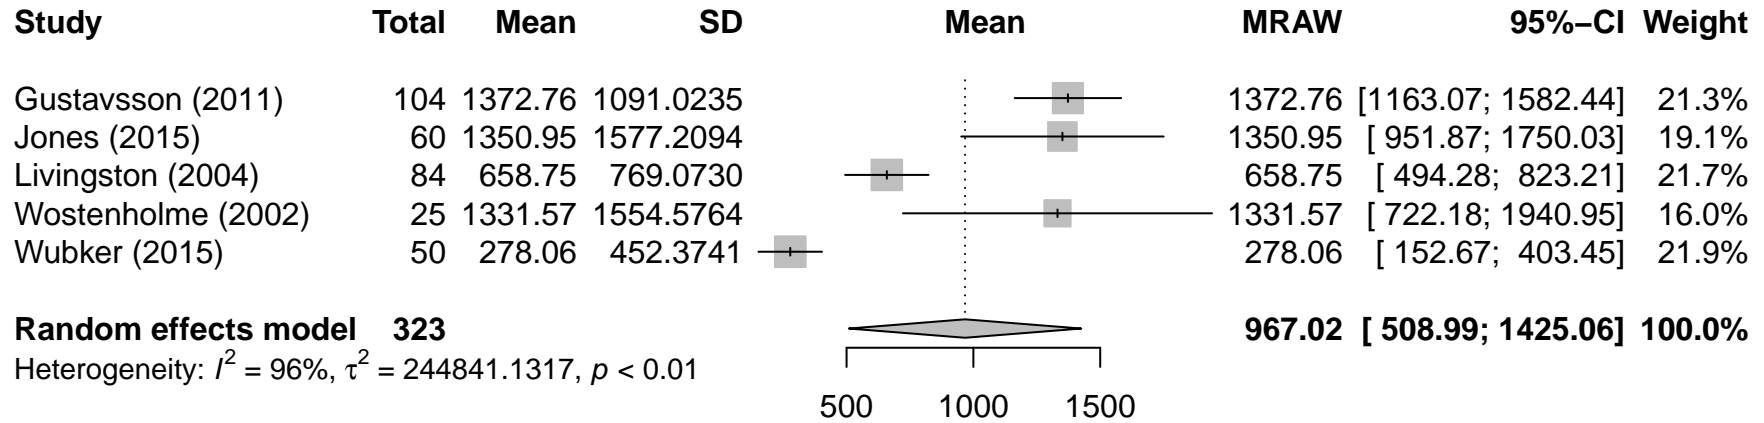

British Isles, All, Severe, Institutional care

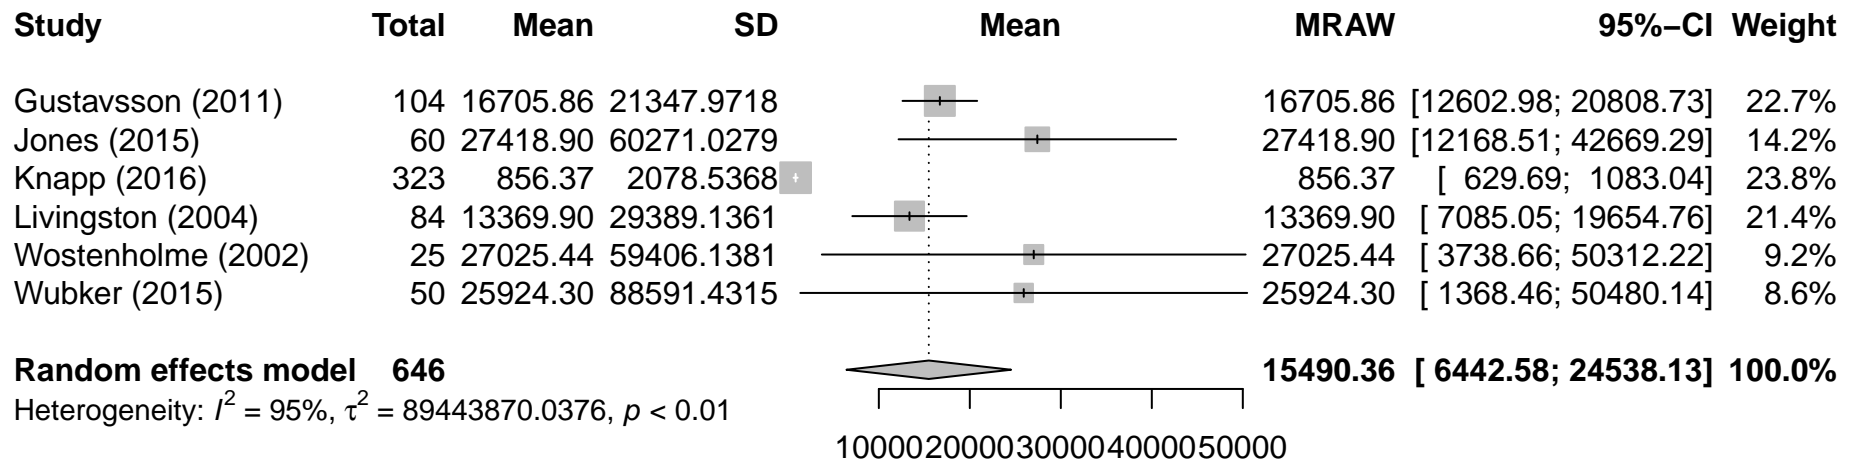

British Isles, All, Severe, Community care

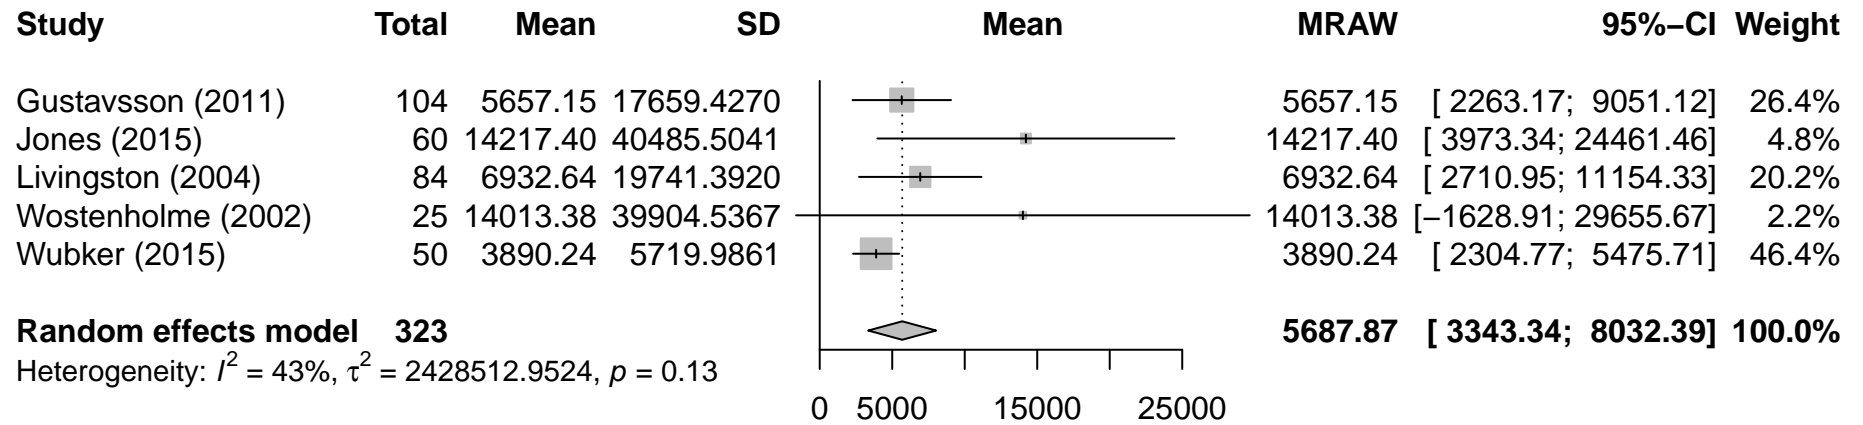

British Isles, All, Severe, Caregiver work loss

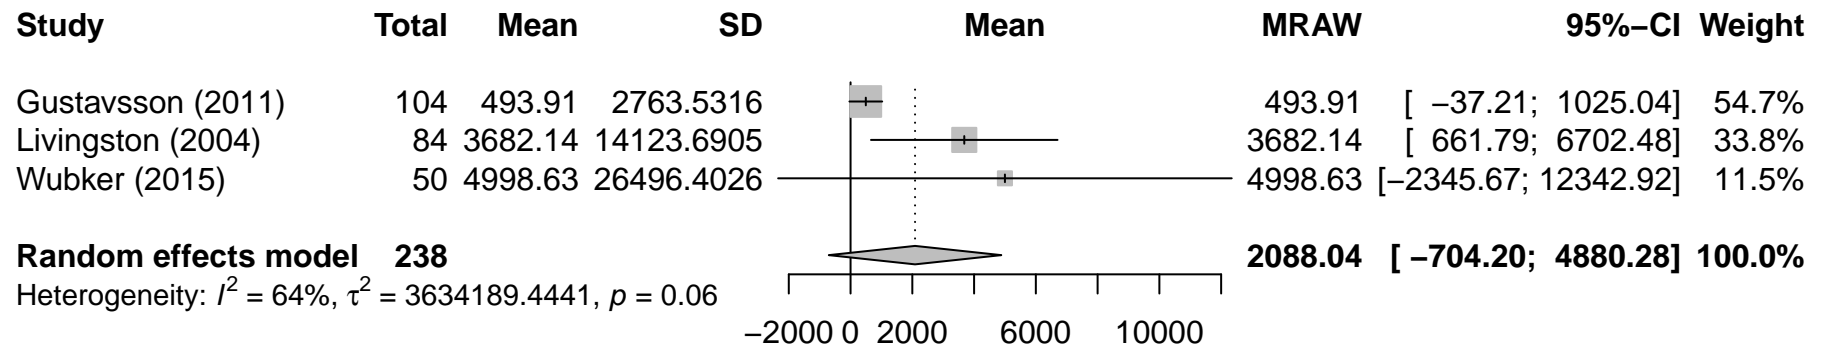

British Isles, All, Severe, Caregiver time

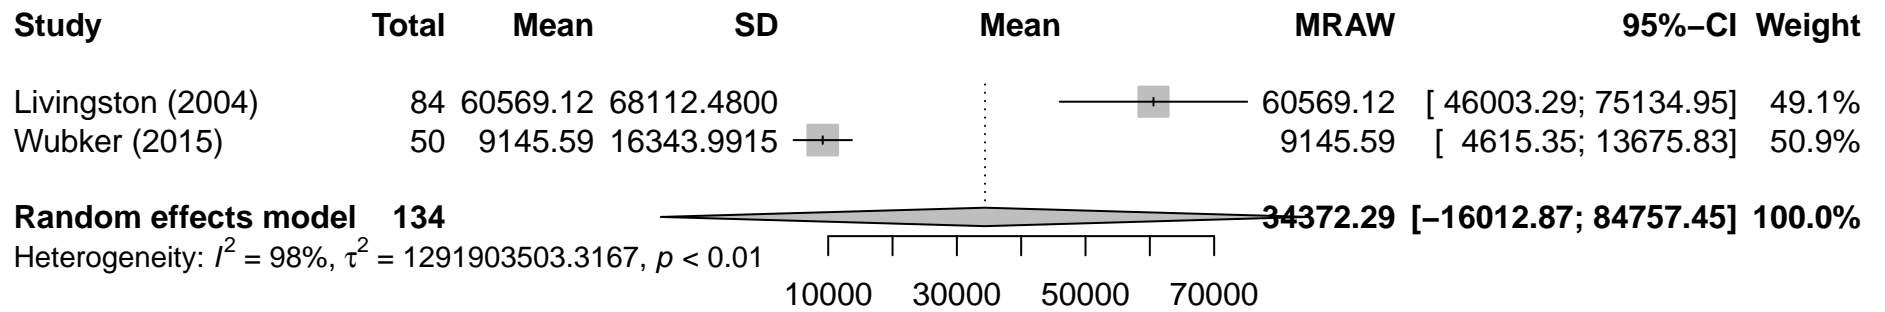

British Isles, All, All, Inpatient care

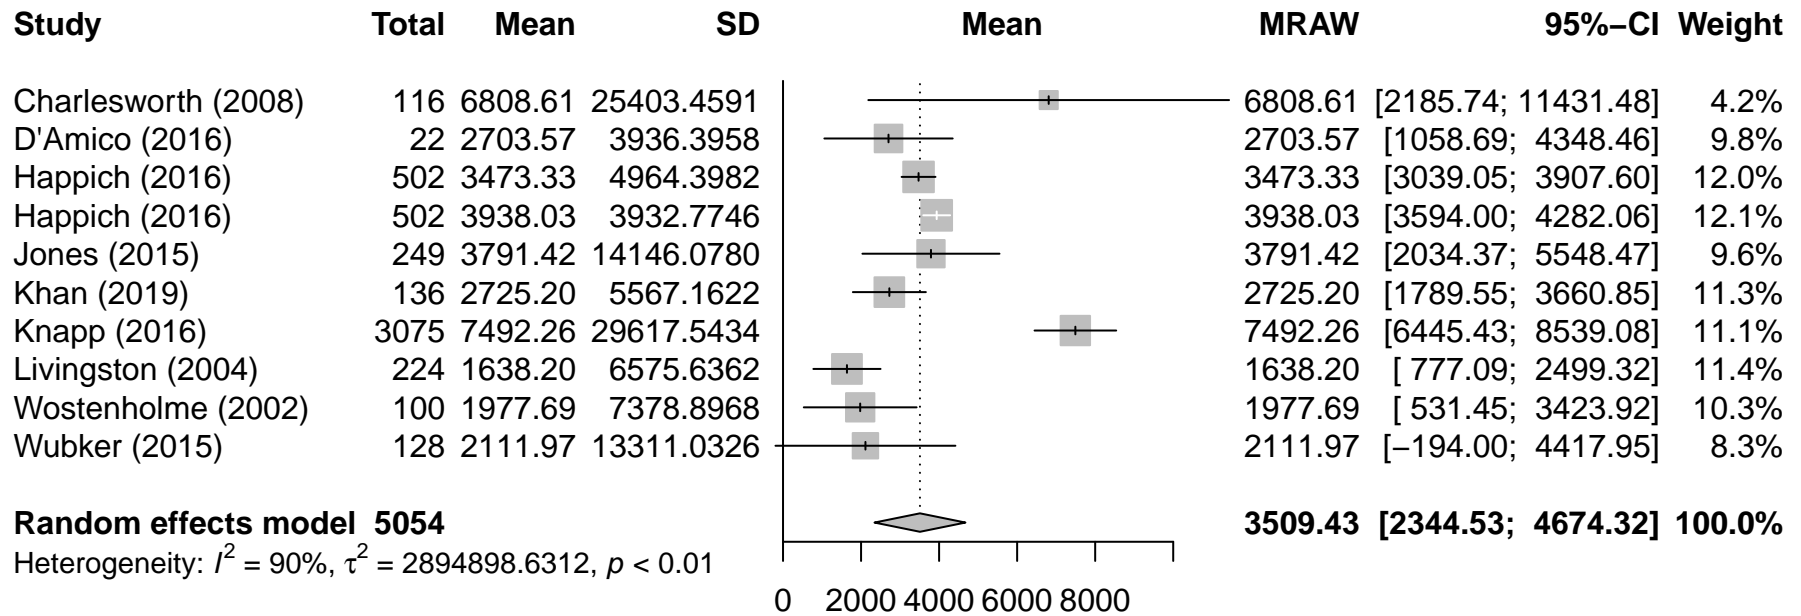

British Isles, All, All, Outpatient care

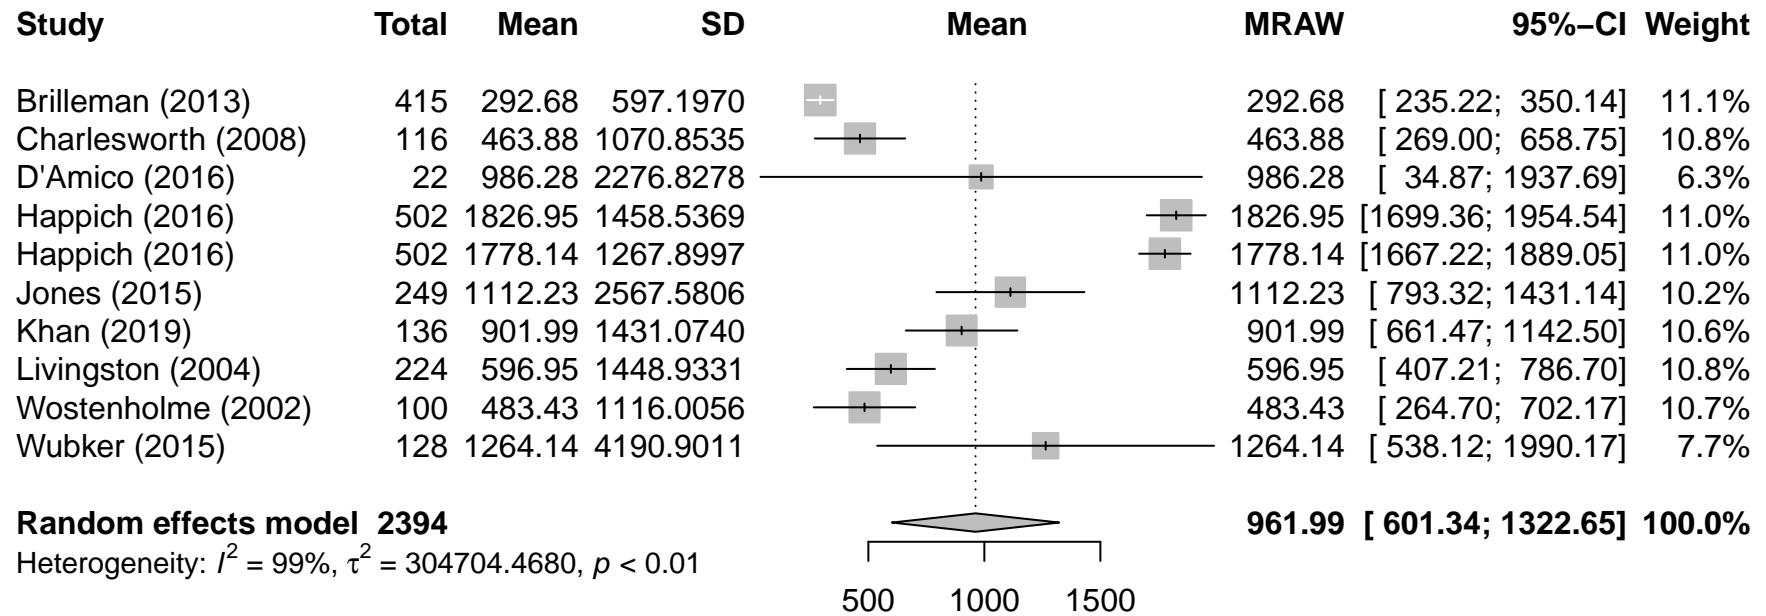

British Isles, All, All, Pharmaceuticals

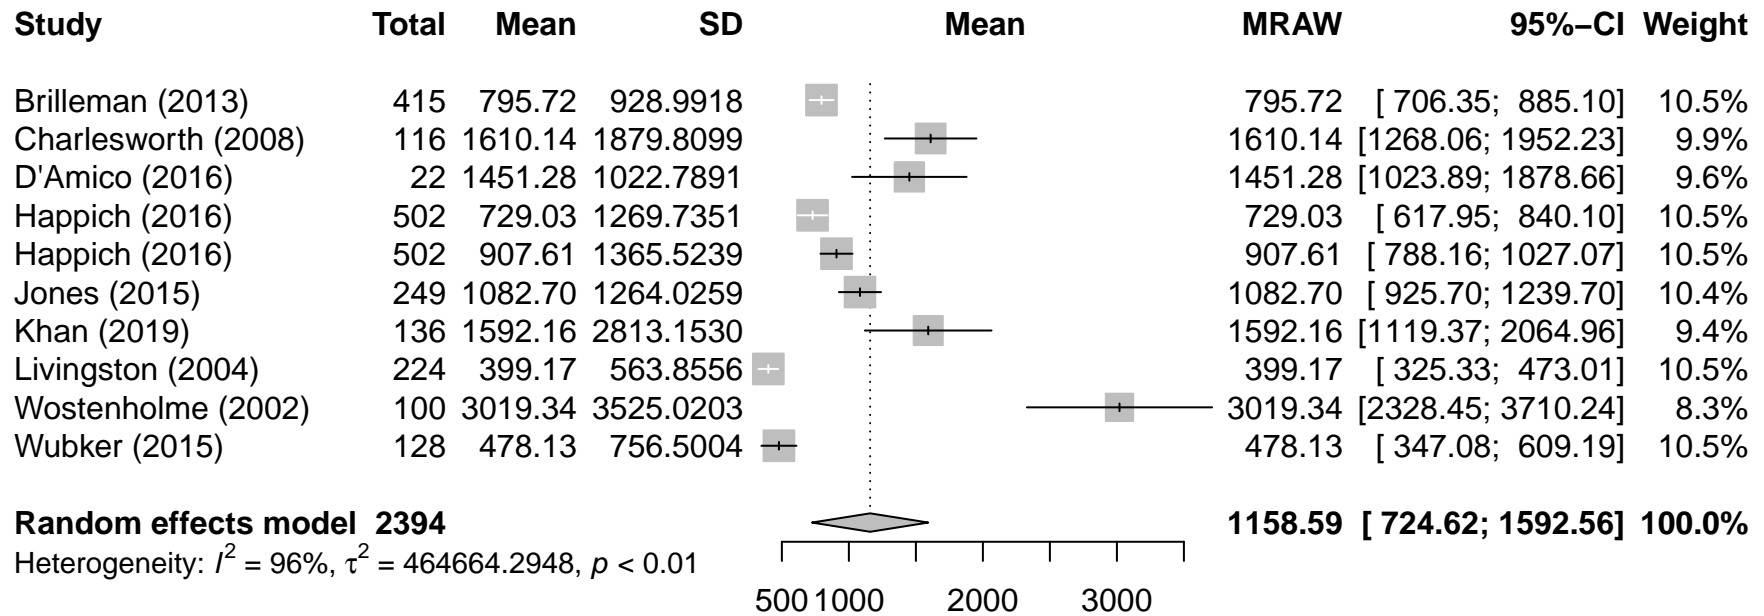



British Isles, All, All, Institutional care

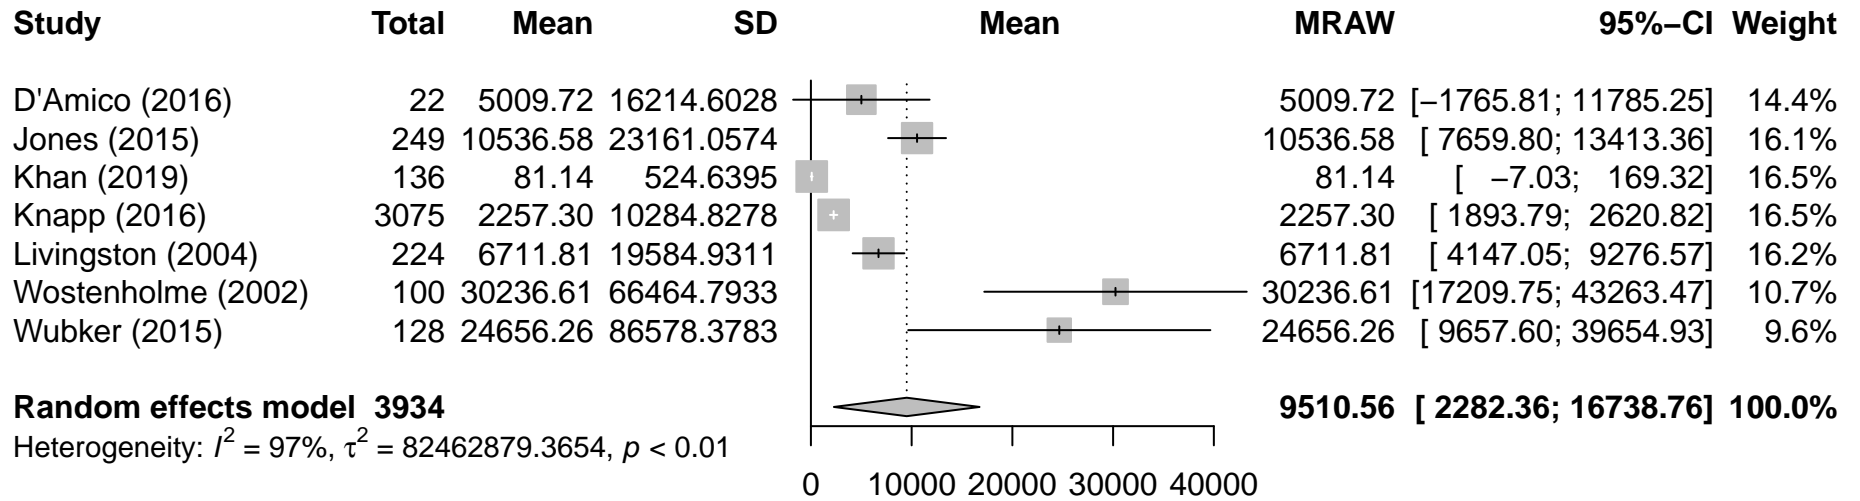

British Isles, All, All, Community care

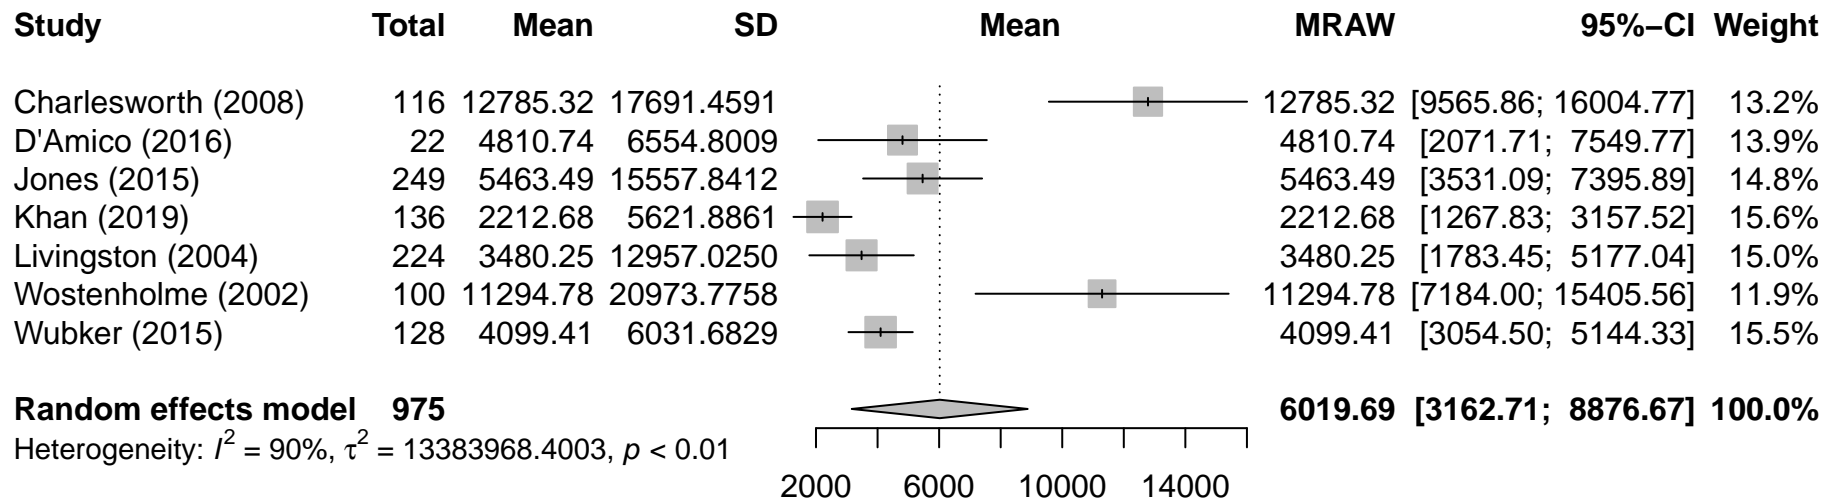

British Isles, All, All, Caregiver work loss

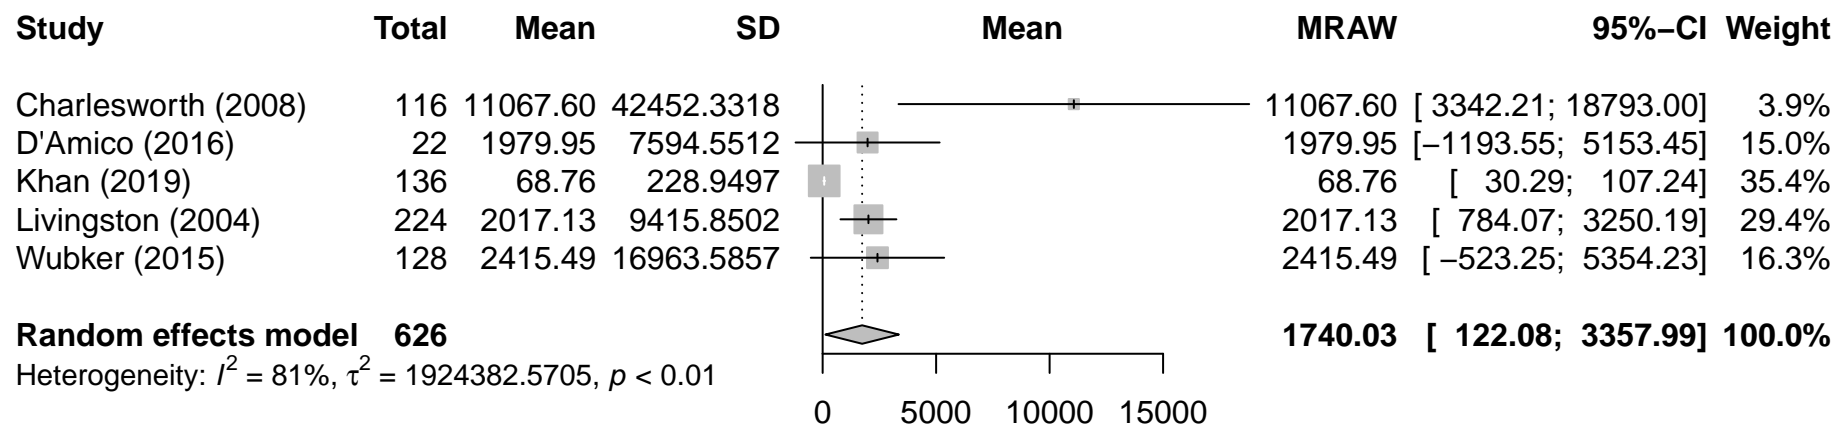

British Isles, All, All, Caregiver time

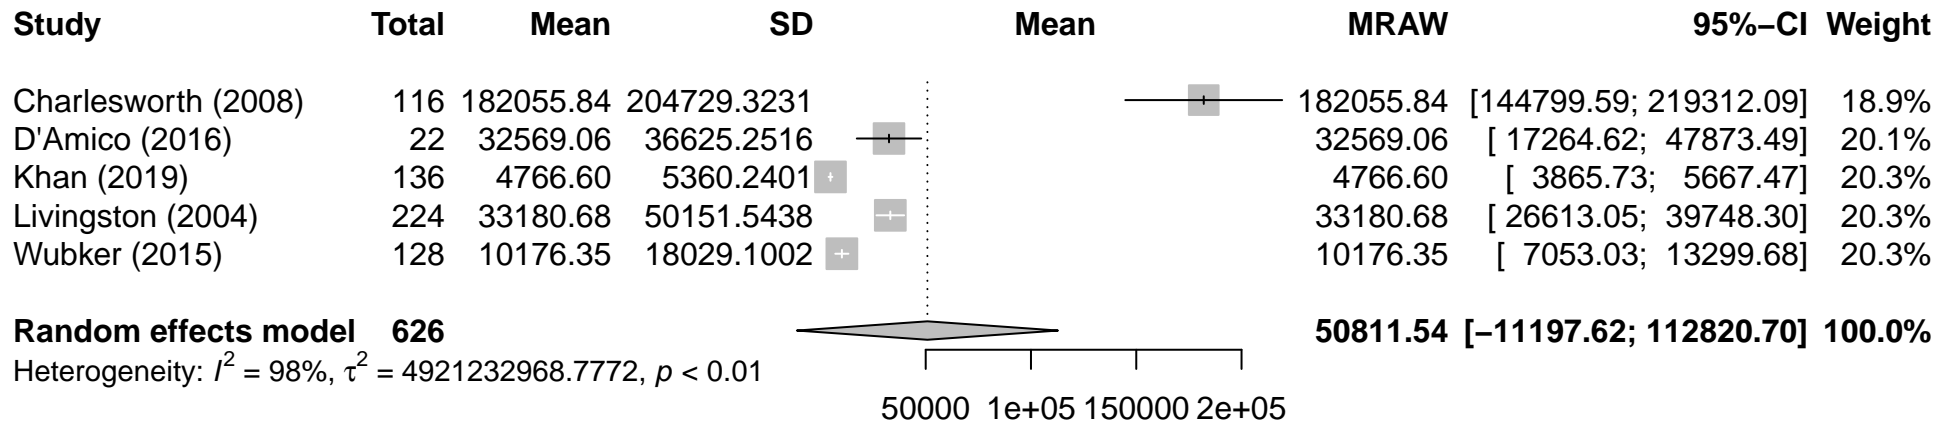

Supplement: 40273_2022_1212_MOESM1_ESM.pdf [file 40273_2022_1212_MOESM1_ESM.pdf]
